# Supplementary material for: The development of the oral resistome during the first decade of life
Source: Research Square preprint supplement (doi:10.21203/rs.3.rs-477787/v1), 2022-07-13
Supplement: Supplementary file 1 [file ce4194f73dc22a8fe24b90e7.xlsx]

## Sheet: S1 Sequencing Metrics
Table S1: Sequence metrics for all 535 samples.
Sequencing Batch	Sample	Raw_reads	Target_reads	%_host	Num_contgs	Tot_bp	Max_bp	Mean_bp	N50
9256	T1648B_03102014_Q2_Q3	58832538	21654922	63.192	165005	196814042	742178	1192	2039
9256	T1444A_03102014_Q2_Q3	52985080	19733436	62.757	157907	166321082	749550	1053	1543
9256	T1529B_01102014_Q2_Q3	54248752	20746674	61.756	90177	104611988	513623	1160	1768
9256	T1468A_30092014_Q2_Q3	56571040	22471262	60.278	140340	204245716	889784	1455	3424
9256	T1351B_03102014_Q2_Q3	52891834	21347724	59.639	134159	135746085	323244	1011	1401
9256	T1634B_01102014_Q2_Q3	56536682	22916198	59.467	160798	193956138	444966	1206	1940
9256	T1556B_30092014_Q2_Q3	58722832	24181682	58.821	127014	157561688	683481	1240	2122
9256	T1664A_30092014_Q2_Q3	56593646	23657002	58.198	125145	172606748	323188	1379	3185
9256	T1327A_29092014_Q2_Q3	55784722	24400046	56.26	149634	185299554	990113	1238	2301
9256	T1553A_02102014_Q2_Q3	56686950	25059988	55.792	130305	133693254	306388	1026	1403
9256	T1622A_30092014_Q2_Q3	52651510	23643116	55.095	132759	154883832	556485	1166	2210
9256	T1659A_29092014_Q2_Q3	68064798	31300092	54.014	175349	217383558	336418	1239	2211
9256	T1397A_29092014_Q2_Q3	64406770	29625800	54.002	125215	176338764	993188	1408	3405
9256	T1394A_30092014_Q2_Q3	58114980	26949298	53.628	139967	195507901	698902	1396	3019
9256	T1026B_03102014_Q2_Q3	48145378	22716988	52.816	64677	64945603	253561	1004	1336
9256	T1345A_29092014_Q2_Q3	59788598	28364246	52.559	129982	162458438	391095	1249	2244
9256	T1553B_02102014_Q2_Q3	54146040	25941208	52.09	74110	85772555	253561	1157	1958
9256	T1026A_03102014_Q2_Q3	53703912	25892506	51.787	159009	178455639	996540	1122	2000
9256	T1087A_03102014_Q2_Q3	61714740	30255886	50.975	72989	122800930	717749	1682	6788
9256	T1444B_03102014_Q2_Q3	48693950	24146134	50.412	133821	151971623	274985	1135	1755
9256	T1185A_02102014_Q2_Q3	57518426	28556048	50.353	175978	200558346	306888	1139	1787
9256	T1345B_29092014_Q2_Q3	60722392	30148168	50.351	91435	145198685	253561	1587	3715
9256	T1327B_29092014_Q2_Q3	53470892	26854382	49.778	79119	139636260	637406	1764	6040
9256	T1349B_30092014_Q2_Q3	45966500	23141754	49.655	120601	128391598	343994	1064	1546
9256	T1281A_02102014_Q2_Q3	49302322	24908688	49.478	181255	215741437	456687	1190	1986
9256	T1044B_15072014_Q2_Q3	61194590	31175902	49.054	141535	214705805	294844	1516	3418
9256	T1044A_15072014_Q2_Q3	76114374	39750124	47.776	159179	210864850	620484	1324	2804
9256	T1374B_02102014_Q2_Q3	60462760	31886492	47.263	177491	224583713	529021	1265	2255
9256	T1190A_01102014_Q2_Q3	56968774	30050608	47.251	173147	214136893	325059	1236	2282
9256	T1310B_30092014_Q2_Q3	56599016	30136586	46.754	168796	243801775	381181	1444	2956
9256	T1310A_30092014_Q2_Q3	57087234	31001018	45.695	157871	207438384	356024	1313	2436
9256	T1513B_29092014_Q2_Q3	23003168	12586546	45.283	107851	134969447	453867	1251	2261
9256	T1055B_29092014_Q2_Q3	62895006	35985786	42.784	85382	134158116	484673	1571	4086
9256	T1198B_15072014_Q2_Q3	60211428	34596844	42.541	244385	308267863	592981	1261	2456
9256	T1062B_30092014_Q2_Q3	64202362	37017516	42.342	202236	269142531	424073	1330	2765
9256	T1087B_03102014_Q2_Q3	56174680	32409992	42.305	113542	133141608	446650	1172	1865
9256	T1192A_9042015_Q2_Q3	54894978	31744454	42.172	124163	170581584	319790	1373	3106
9256	T1622B_30092014_Q2_Q3	56558266	32978502	41.691	133003	152421886	287331	1146	1917
9256	T1016A_03102014_Q2_Q3	65802446	38538186	41.434	193460	247398374	379516	1278	2376
9256	T1398A_01102014_Q2_Q3	57100614	33711864	40.961	124562	176575412	410051	1417	3161
9256	T1607B_01102014_Q2_Q3	56326494	33307144	40.868	50984	80107018	595965	1571	4115
9256	T1644B_30092014_Q2_Q3	50075114	29796154	40.497	46716	75476542	841639	1615	4548
9256	T1644A_30092014_Q2_Q3	48322752	28772980	40.457	34564	49145501	382243	1421	3586
9256	T1654A_29092014_Q2_Q3	56557282	33676572	40.456	175765	225217134	637840	1281	2499
9256	T1136B_02102014_Q2_Q3	46604616	27767776	40.418	108336	150747817	581453	1391	3443
9256	T1623B_03102014_Q2_Q3	54489176	32835890	39.739	151542	188654141	566415	1244	2210
9256	T1296A_02102014_Q2_Q3	56024394	33779460	39.706	135306	158132730	932819	1168	1871
9256	T1374A_02102014_Q2_Q3	53384870	32249274	39.591	107396	147548323	232319	1373	2824
9256	T1270B_8042015_Q2_Q3	63140272	38655882	38.778	163992	227242965	339318	1385	2903
9256	T1136A_02102014_Q2_Q3	53372964	33582846	37.079	115599	198086132	803432	1713	5103
9256	T1249A_01102014_Q2_Q3	48862286	30877438	36.807	92580	125080248	670004	1351	2836
9256	T1560A_02102014_Q2_Q3	52462460	33419062	36.299	114867	134033748	526592	1166	1889
9256	T1327C_29092014_Q2_Q3	67637004	43719746	35.361	203704	297459279	728738	1460	3805
9256	T1297A_01102014_Q2_Q3	60229620	39896722	33.759	103548	117615222	329071	1135	1975
9256	T1338A_29092014_Q2_Q3	58653730	38899630	33.679	92235	159907832	443426	1733	5783
9256	T1296B_02102014_Q2_Q3	55945348	37979092	32.114	117061	159403618	427107	1361	2830
9256	T1338B_29092014_Q2_Q3	52514638	35707262	32.005	191962	268755580	750193	1400	3073
9256	T1185B_02102014_Q2_Q3	46119152	31527240	31.64	138883	176847714	424793	1273	2592
9256	T1011B_9042015_Q2_Q3	72055242	49562452	31.216	122348	192841675	699938	1576	4448
9256	T1329A_02102014_Q2_Q3	56766702	39492050	30.431	92413	156321930	830486	1691	5308
9256	T1654B_29092014_Q2_Q3	53720108	37644772	29.924	148853	184130153	362194	1236	2093
9256	T1055A_29092014_Q2_Q3	59027970	41657104	29.428	149066	203369788	485419	1364	2537
9256	T1398B_01102014_Q2_Q3	46675992	33008590	29.281	89924	111662118	253561	1241	2123
9256	T1488B_15072014_Q2_Q3	62490544	44328612	29.063	129733	231833737	516114	1787	5017
9256	T1529A_01102014_Q2_Q3	51962214	36890284	29.006	139759	171122784	904223	1224	2051
9256	T1349A_30092014_Q2_Q3	57397818	41023122	28.528	172887	224143698	348404	1296	2668
9256	T1397B_29092014_Q2_Q3	65703596	47187016	28.182	74672	107397210	993200	1438	3763
9256	T1013A_03102014_Q2_Q3	56024868	40316646	28.038	111358	151454679	461007	1360	2897
9256	T1629B_17072014_Q2_Q3	62215322	44913250	27.81	144279	184348295	595174	1277	2657
9256	T1607A_01102014_Q2_Q3	50742242	36646086	27.78	43143	66277100	348705	1536	4564
9256	T1249B_01102014_Q2_Q3	54239784	39211162	27.708	68113	71118079	253561	1044	1480
9256	T1297B_01102014_Q2_Q3	48125796	34853122	27.579	109267	111387909	232319	1019	1495
9256	T1319B_03102014_Q2_Q3	58307358	42830496	26.544	221155	283263387	458072	1280	2445
9256	T1192B_9042015_Q2_Q3	65435674	48325230	26.148	148863	202724774	414799	1361	2893
9256	T1560B_02102014_Q2_Q3	47994022	35529206	25.972	99339	106561739	352511	1072	1708
9256	T1513A_29092014_Q2_Q3	58489702	43648306	25.374	98778	135479169	471981	1371	3174
9256	T1648A_03102014_Q2_Q3	62158900	46475828	25.231	107037	152830773	278678	1427	3739
9256	T1659B_29092014_Q2_Q3	59181332	44417066	24.948	176042	241128978	396139	1369	3040
9256	T1062A_30092014_Q2_Q3	49830208	37817560	24.107	194724	279719125	413947	1436	3534
9256	T1500A_29092014_Q2_Q3	51109666	38801446	24.082	164955	215219144	739671	1304	2451
9256	T1351A_03102014_Q2_Q3	53782430	40840998	24.063	285661	313388246	350287	1097	1800
9256	T1488A_15072014_Q2_Q3	79891380	61548904	22.959	95947	156693576	688487	1633	4601
9256	T1615B_02102014_Q2_Q3	46336362	36172194	21.936	49057	63857132	336603	1301	2491
9256	T1071B_01102014_Q2_Q3	67435554	53169844	21.155	144727	201224961	701340	1390	3178
9256	T1664B_30092014_Q2_Q3	49158120	38897538	20.873	92300	141716851	487066	1535	4700
9256	T1236A_26032007_D1_D2	64157586	50788778	20.837	52849	108434885	486802	2051	8428
9256	T1270A_8042015_Q2_Q3	70418646	55939408	20.562	140519	182751014	618387	1300	2512
9256	T1123B_8042015_Q2_Q3	57306364	46099420	19.556	217128	289169357	561265	1331	2846
9256	T1634A_01102014_Q2_Q3	57063066	46107136	19.2	118601	163951088	936230	1382	2905
9256	T1669A_26092010_D1_D2	71432938	57901460	18.943	173852	181549163	219471	1044	1766
9256	T1468B_30092014_Q2_Q3	61515908	49927304	18.838	152718	226154732	999266	1480	3616
9256	T1629B_18012008_D1_D2	72137182	59064288	18.122	72638	89252420	578398	1228	2539
9256	T1620B_9042015_Q2_Q3	60460350	50290630	16.82	138235	180507068	252827	1305	2540
9256	T1018B_1032005_D1_D2	56625546	47701318	15.76	56909	73126762	341015	1284	3085
9256	T1329B_02102014_Q2_Q3	58999426	49774248	15.636	56777	70489875	400245	1241	2160
9256	T1013B_03102014_Q2_Q3	43893330	37414152	14.761	86966	113955937	253561	1310	2486
9256	T1190B_01102014_Q2_Q3	61017790	52132864	14.561	157302	233402407	369366	1483	3388
9256	T1071A_01102014_Q2_Q3	53439002	45696410	14.489	106134	166848085	600249	1572	3889
9256	T1319A_03102014_Q2_Q3	58335488	49914516	14.435	248584	274325663	723919	1103	1768
9256	T1321B_11042015_Q2_Q3	67533798	57885430	14.287	160740	200521778	743293	1247	2308
9256	T1006A_1032005_D1_D2	59312910	51035636	13.955	86304	106940894	414634	1239	2573
9256	T1018A_1032005_D1_D2	54959466	47385752	13.781	105577	117925617	390166	1116	2089
9256	T1409A_20052007_D1_D2	60434380	52140420	13.724	100793	122288153	550782	1213	2268
9256	T1622A_19102007_D1_D2	50973236	44357622	12.979	93275	121695297	449049	1304	2483
9256	T1011A_9042015_Q2_Q3	62998176	54824122	12.975	127884	223185831	829807	1745	5303
9256	T1500B_29092014_Q2_Q3	51774608	45425790	12.262	94610	107330919	380825	1134	1717
9256	T1349B_30042007_D1_D2	64118484	56429652	11.992	149706	178948503	420552	1195	2353
9256	T1623A_03102014_Q2_Q3	62014822	54779762	11.667	63220	73824546	232226	1167	1946
9256	T1604A_7102007_D1_D2	54135494	48170104	11.019	42912	71885099	276030	1675	5689
9256	T1658A_20052010_D1_D2	61436434	54745310	10.891	190477	217294621	557880	1140	2294
9256	T1620A_9042015_Q2_Q3	60546538	54056310	10.719	167686	217321364	389558	1296	2573
9256	T1357B_29112006_D1_D2	51262276	45883240	10.493	52131	76472544	426332	1466	5767
9256	T1016B_03102014_Q2_Q3	58069438	52078526	10.317	140327	210527480	681280	1500	4373
9256	T1623A_18102007_D1_D2	52112420	46873314	10.053	64033	91598689	912687	1430	3261
9256	T1321A_11042015_Q2_Q3	79476668	71554492	9.968	268478	334278640	417286	1245	2715
9256	T1648A_16062009_D1_D2	76423588	68994600	9.721	140721	150361250	855560	1068	1683
9256	T1654B_08092008_D1_D2	62477050	56425914	9.685	45813	125420745	943695	2737	12745
9256	T1553B_30052008_D1_D2	67750078	61356508	9.437	283026	292314006	347071	1032	1652
9256	T1026B_28042005_D1_D2	52050382	47179156	9.359	47539	81141255	652124	1706	5820
9256	T1615A_02102014_Q2_Q3	58702646	53389826	9.05	54406	94912672	692803	1744	5784
9256	T1472A_25022007_D1_D2	12258194	11215924	8.503	13883	31669637	260054	2281	9019
9256	T1123A_8042015_Q2_Q3	70630686	64877144	8.146	192173	282350602	550562	1469	3877
9256	T1026A_28042005_D1_D2	55545116	51289418	7.662	73221	102826197	267132	1404	3358
9256	T1522A_12042015_Q2_Q3	58311894	53972124	7.442	270317	344827738	379598	1275	2374
9256	T1604B_7102007_D1_D2	70469914	65577078	6.943	56621	105978570	364451	1871	6624
9256	T1016B_28042005_D1_D2	16274962	15257972	6.249	32664	50835322	563310	1556	4087
9256	T1644A_21042008_D1_D2	68813864	64538796	6.213	58771	114736813	904031	1952	7957
9256	T1327B_13112006_D1_D2	58906546	55344644	6.047	35445	108520582	669990	3061	15224
9256	T1472A_22062008_D1_D2	71825778	67631880	5.839	294910	340670433	997528	1155	2034
9256	T1607B_23072007_D1_D2	51199880	48284030	5.695	59101	102290339	878281	1730	5005
9256	T1013B_12042005_D1_D2	44016966	41669432	5.333	75151	105464088	959417	1403	3335
9256	T1622B_19102007_D1_D2	73143902	69294526	5.263	91164	120537480	516257	1322	2929
9256	T1297B_14052007_D1_D2	55589732	52754234	5.101	189392	220789657	481798	1165	2337
9256	T1349A_30042007_D1_D2	55759524	52923474	5.086	177568	218783821	780229	1232	2500
9256	T1297A_14052007_D1_D2	60137400	57095226	5.059	198595	265863878	681096	1338	3235
9256	T1329A_23112007_D1_D2	52689654	50047090	5.015	163515	153712256	280533	940	1502
9256	T1535B_29042007_D1_D2	55337788	52631996	4.89	12740	33217674	900305	2607	22197
9256	T1644B_21042008_D1_D2	13903110	13248502	4.708	51211	75296894	1052975	1470	3286
9256	T1529A_13042007_D1_D2	71688280	68347522	4.66	11843	39661133	520382	3348	19064
9256	T1664A_04122008_D1_D2	54790616	52239656	4.656	93351	119287693	396479	1277	2477
9256	T1444B_08032007_D1_D2	51870886	49464100	4.64	60282	82866856	575789	1374	3683
9256	T1060A_1072005_D1_D2	52631784	50225386	4.572	21208	35352502	1090632	1666	5766
9256	T1310A_30042007_D1_D2	57049254	54478188	4.507	235830	261370999	305462	1108	2041
9256	T1469B_8072007_D1_D2	57893012	55378900	4.343	77366	113126124	371043	1462	4133
9256	T1472B_25022007_D1_D2	6731196	6447160	4.22	20547	27134407	124666	1320	3017
9256	T1394A_15102007_D1_D2	54418556	52130800	4.204	265531	279784926	289967	1053	1949
9256	T1327C_13112006_D1_D2	70178400	67357582	4.019	19212	41173039	342267	2143	15613
9256	T1246A_12062006_D1_D2	67053234	64379752	3.987	22016	46514185	1151458	2112	8767
9256	T1001B_14042014_Q2_Q3	55697286	53506106	3.934	182105	200550561	293147	1101	1840
9256	T1659B_17072009_D1_D2	60616454	58347210	3.744	192076	202666947	564967	1055	1706
9256	T1329A_06112006_D1_D2	22306190	21487086	3.672	9186	32916592	1003318	3583	37466
9256	T1500A_23042007_D1_D2	56745776	54758748	3.502	83375	158855209	914064	1905	6738
9256	T1529B_08052008_D1_D2	55270128	53335324	3.501	196110	223745221	408932	1140	1941
9256	T1472B_22062008_D1_D2	66628168	64314010	3.473	346734	359699989	345253	1037	1793
9256	T1420A_11092007_D1_D2	67429194	65121654	3.422	338592	322157466	383082	951	1814
9256	T1327A_13112006_D1_D2	67009138	64738618	3.388	41109	51313943	473590	1248	2734
9256	T1409B_20052007_D1_D2	63442902	61303000	3.373	90665	125708139	349086	1386	3518
9256	T1049B_15042014_Q2_Q3	57578736	55643984	3.36	271155	332602422	307979	1226	2224
9256	T1535A_29042007_D1_D2	17750252	17174434	3.244	24400	40399403	340019	1655	7343
9256	T1329B_23112007_D1_D2	61722342	59766238	3.169	197694	202228651	347527	1022	1854
9256	T1472A_15042014_Q2_Q3	67189588	65070150	3.154	206232	269748266	520436	1307	2642
9256	T1060A_16042014_Q2_Q3	56341576	54635624	3.028	331427	347924797	441031	1049	1718
9256	T1249A_02112007_D1_D2	51415460	49918276	2.912	354241	317756318	438376	897	1357
9256	T1249B_02112007_D1_D2	50270652	48879042	2.768	312091	319033539	367015	1022	1837
9256	T1615B_13112008_D1_D2	66805038	64970510	2.746	80211	116713048	399110	1455	5594
9256	T1659A_17072009_D1_D2	71960166	70061686	2.638	191958	225966547	454239	1177	2224
9256	T1469B_12122007_D1_D2	70601114	68789854	2.565	186455	254339059	479435	1364	3175
9256	T1327A_28082007_D1_D2	76867492	74938768	2.509	84267	95467023	670465	1132	1813
9256	T1529A_08052008_D1_D2	66930250	65276302	2.471	263633	273894996	268918	1038	1762
9256	T1472B_15042014_Q2_Q3	58812396	57370682	2.451	194124	272309837	574798	1402	2891
9256	T1345A_08012008_D1_D2	60254966	58809870	2.398	160982	197769206	590081	1228	2455
9256	T1044B_23012007_D1_D2	58734988	57415060	2.247	260620	276859703	791315	1062	1892
9256	T1236A_6072006_D1_D2	66625924	65159736	2.201	43210	66964152	564710	1549	7306
9256	T1317A_15042014_Q2_Q3	26211724	25636954	2.193	127285	173993748	469899	1366	2551
9256	T1236B_26032007_D1_D2	85983106	84104462	2.185	84794	108837385	273073	1283	2580
9256	T1074B_31072005_D1_D2	68369898	66893032	2.16	27762	33270351	1183904	1198	2662
9256	T1469A_12122007_D1_D2	66371374	64974062	2.105	180938	227861784	431882	1259	2701
9256	T1556B_17122007_D1_D2	75435342	73858408	2.09	201110	291070456	1272264	1447	3503
9256	T1654A_08092008_D1_D2	89089218	87268188	2.044	38945	77754369	639283	1996	9435
9256	T1409B_16012008_D1_D2	59559854	58387706	1.968	168061	159869644	463580	951	1418
9256	T1420B_11092007_D1_D2	77382312	75860656	1.966	180439	166306258	566005	921	1312
9256	T1669B_8072009_D1_D2	11585472	11361062	1.937	47183	69157232	167032	1465	2896
9256	T1615A_13112008_D1_D2	57868014	56751516	1.929	117135	159390395	781519	1360	3209
9256	T1296A_23042008_D1_D2	62360040	61157736	1.928	124418	172858327	337326	1389	3334
9256	T1525A_10052007_D1_D2	51572396	50592286	1.9	55464	82949375	432939	1495	4194
9256	T1117A_14042014_Q2_Q3	55821596	54790542	1.847	182087	236831800	535880	1300	2465
9256	T1525B_10052007_D1_D2	72701320	71420818	1.761	95121	113638426	398379	1194	2883
9256	T1529B_13042007_D1_D2	68761446	67564642	1.741	19418	26696854	249460	1374	7757
9256	T1338B_04022008_D1_D2	63594318	62493988	1.73	274953	284634631	534176	1035	1742
9256	T1513B_19042007_D1_D2	66810604	65666440	1.713	86356	136635169	723699	1582	4345
9256	T1345A_22012007_D1_D2	60914118	59873618	1.708	85613	122823017	872117	1434	2853
9256	T1409A_16012008_D1_D2	75749980	74476080	1.682	128913	157012847	579104	1217	2875
9256	T1644B_11082009_D1_D2	63845716	62792246	1.65	212294	267567571	956333	1260	2807
9256	T1412B_4012008_D1_D2	65288474	64212456	1.648	179126	208591028	720202	1164	1972
9256	T1357A_29112006_D1_D2	68542630	67438542	1.611	33214	52379543	530852	1577	4296
9256	T1662A_31102008_D1_D2	61133890	60174274	1.57	13189	30370055	650904	2302	8197
9256	T1556A_17122007_D1_D2	76383364	75185398	1.568	174521	230197759	558176	1319	2598
9256	T1394B_15102007_D1_D2	69599658	68518182	1.554	165899	165011477	818218	994	1571
9256	T1329B_06112006_D1_D2	75911258	74778772	1.492	33834	60205009	529844	1779	5450
9256	T1296A_18092006_D1_D2	56608312	55776732	1.469	43751	69021294	833530	1577	4819
9256	T1488A_25102007_D1_D2	75163576	74061658	1.466	126908	167638578	630714	1320	2965
9256	T1185B_22102007_D1_D2	52172976	51414324	1.454	207852	264858955	683956	1274	3124
9256	T1623B_14042008_D1_D2	54760554	53982942	1.42	192625	228710321	592039	1187	2272
9256	T1229A_14032007_D1_D2	63926618	63019632	1.419	108256	151049499	688889	1395	3623
9256	T1026A_27022007_D1_D2	47441572	46770734	1.414	295056	314784162	487464	1066	1851
9256	T1136B_02032007_D1_D2	47408382	46738302	1.413	222394	247898413	298669	1114	1937
9256	T1310B_30042007_D1_D2	60130172	59284244	1.407	334006	366639317	524647	1097	2055
9256	T1648B_14042008_D1_D2	64356026	63464894	1.385	28431	43482452	925564	1529	6126
9256	T1469A_8072007_D1_D2	51984272	51269206	1.376	46995	80540733	499213	1713	4847
9256	T1236A_15042014_Q2_Q3	61896110	61046894	1.372	119475	202310316	434456	1693	5647
9256	T1488B_25102007_D1_D2	61397312	60561428	1.361	91457	110061822	858390	1203	2309
9256	T1185A_22102007_D1_D2	50216606	49541280	1.345	312945	305565530	311352	976	1666
9256	T1412A_4012008_D1_D2	66098000	65226662	1.318	180640	212877690	698362	1178	2082
9256	T1623B_18102007_D1_D2	73737052	72777222	1.302	91220	137156619	1052164	1503	5015
9256	T1246A_7032008_D1_D2	67309512	66449864	1.277	215935	286865959	573411	1328	3121
9256	T1327B_28082007_D1_D2	81326158	80319238	1.238	67997	119810852	613714	1762	6617
9256	T1644A_11082009_D1_D2	69209894	68374838	1.207	201763	251308915	704895	1245	2635
9256	T1669A_8072009_D1_D2	70388288	69544766	1.198	91943	125227062	430976	1362	2906
9256	T1658A_6012009_D1_D2	118719780	117369122	1.138	47872	74859558	627649	1563	4557
9256	T1337B_22102007_D1_D2	68525704	67750946	1.131	234914	273302453	456786	1163	2457
9256	T1669B_16042014_Q2_Q3	61430944	60746932	1.113	143647	162506530	443024	1131	1963
9256	T1337A_15112006_D1_D2	69519722	68749960	1.107	141620	189597292	530561	1338	2882
9256	T1412B_14042014_Q2_Q3	53741352	53149242	1.102	218192	285527248	816482	1308	2557
9256	T1659B_29092008_D1_D2	53943634	53355668	1.09	51249	126905361	777272	2476	10752
9256	T1018B_15042014_Q2_Q3	44134204	43676276	1.038	207522	251869832	318873	1213	2252
9256	T1658B_6012009_D1_D2	58158532	57563012	1.024	26840	44205224	380639	1646	7464
9256	T1026B_27022007_D1_D2	58785586	58185118	1.021	237930	252444089	683281	1061	2011
9256	T1317B_15042014_Q2_Q3	55162024	54606204	1.008	122261	168781552	241295	1380	3065
9256	T1398B_04022008_D1_D2	58925048	58348150	0.979	226906	300429736	533739	1324	3156
9256	T1623A_14042008_D1_D2	66625604	65973934	0.978	174019	236793888	1210438	1360	3157
9256	T1074A_31072005_D1_D2	54727400	54193358	0.976	15891	21795490	916802	1371	3931
9256	T1662B_1022010_D1_D2	65257926	64625588	0.969	252571	290990513	383908	1152	2107
9256	T1044A_23012007_D1_D2	57652416	57096128	0.965	290079	269469413	316372	928	1476
9256	T1662A_1022010_D1_D2	64762700	64140738	0.96	174578	202817719	357029	1161	2011
9256	T1648B_16062009_D1_D2	60273614	59714514	0.928	46843	60457763	353644	1290	3248
9256	T1337A_22102007_D1_D2	69385994	68754626	0.91	191381	258398246	839755	1350	3030
9256	T1607A_15012009_D1_D2	59624562	59082896	0.908	273023	316599550	500122	1159	2034
9256	T1229B_14032007_D1_D2	63678450	63102588	0.904	75867	97170214	784508	1280	2476
9256	T1338A_04022008_D1_D2	63655616	63086318	0.894	345592	361358824	544727	1045	1867
9256	T1662B_31102008_D1_D2	65551558	64966966	0.892	22036	41908698	658120	1901	7325
9256	T1468A_04122007_D1_D2	56288420	55798420	0.871	142218	175930860	391184	1237	2494
9256	T1553A_30052008_D1_D2	74411952	73784104	0.844	259984	219464676	503119	844	1174
9256	T1658A_16042014_Q2_Q3	56083572	55617240	0.831	104038	137977740	156070	1326	2735
9256	T1136A_02032007_D1_D2	58096028	57615114	0.828	191506	191705176	340898	1001	1588
9256	T1669B_26092010_D1_D2	60681816	60209202	0.779	186220	205048316	647775	1101	1894
9256	T1398A_04022008_D1_D2	63219676	62735906	0.765	56937	118467939	680262	2080	10708
9256	T1337A_16042014_Q2_Q3	57013778	56593358	0.737	123140	132093302	692143	1072	1666
9256	T1604A_15042014_Q2_Q3	45383630	45051742	0.731	237826	279171259	487321	1173	1965
9256	T1246B_14042014_Q2_Q3	42939444	42628698	0.724	181308	268688206	519880	1481	3467
9256	T1060B_14022007_D1_D2	56405838	56012126	0.698	305391	354331970	558729	1160	2170
9256	T1513A_19042007_D1_D2	59963454	59547898	0.693	78632	144641282	743455	1839	5225
9256	T1337B_15112006_D1_D2	46547146	46235524	0.669	118235	167779885	738805	1419	3239
9256	T1319B_27102006_D1_D2	16640728	16529754	0.667	41308	61129658	267153	1479	3557
9256	T1345B_08012008_D1_D2	56274816	55905144	0.657	160831	191117860	1061277	1188	2533
9256	T1236B_15042014_Q2_Q3	52963042	52615830	0.656	175788	263515264	388807	1499	4130
9256	T1049B_7112006_D1_D2	71583588	71144730	0.613	251404	282040434	446678	1121	2045
9256	T1117A_16102006_D1_D2	66700408	66291340	0.613	274110	291740176	448030	1064	1640
9256	T1420A_25022007_D1_D2	50109482	49806682	0.604	37317	65636598	811783	1758	5221
9256	T1604B_15042014_Q2_Q3	48115028	47837116	0.578	234650	292776646	563384	1247	2311
9256	T1607B_15012009_D1_D2	67381912	66995702	0.573	175503	206465333	333685	1176	1973
9256	T1420B_25022007_D1_D2	11849820	11783228	0.562	15014	33270909	513329	2215	9821
9256	T1658B_16042014_Q2_Q3	55285508	54986814	0.54	130948	134531947	359076	1027	1670
9256	T1281A_04022008_D1_D2	58416306	58106680	0.53	308996	373037374	505876	1207	2154
9256	T1074A_15042014_Q2_Q3	74371456	73980692	0.525	204944	321386600	834579	1568	3935
9256	T1117B_16102006_D1_D2	79520814	79146804	0.47	239684	260079544	477039	1085	1819
9256	T1664A_26032009_D1_D2	61544866	61259162	0.464	222474	270126682	495288	1214	2491
9256	T1420B_16042014_Q2_Q3	57625816	57363356	0.455	246232	330304583	705075	1341	2874
9256	T1049A_7112006_D1_D2	64719016	64425842	0.453	219782	287078121	638432	1306	3021
9256	T1669A_16042014_Q2_Q3	71375792	71054128	0.451	144247	187697558	470445	1301	2776
9256	T1351B_08022008_D1_D2	55368694	55133394	0.425	300472	401904878	1025127	1337	2784
9256	T1468B_04122007_D1_D2	60265450	60013228	0.419	220838	279157963	443112	1264	2873
9256	T1281B_04022008_D1_D2	63173688	62913146	0.412	273066	321207096	568886	1176	2052
9256	T1469B_16042014_Q2_Q3	55826752	55596740	0.412	288095	396896404	704265	1377	3207
9256	T1500B_21012008_D1_D2	65045672	64778102	0.411	148993	203400519	697153	1365	3930
9256	T1338B_05012007_D1_D2	58021932	57786186	0.406	159541	209210290	638696	1311	2847
9256	T1296B_23042008_D1_D2	67970382	67698260	0.4	165165	185244394	294952	1121	2441
9256	T1062B_01062006_D1_D2	64923238	64668270	0.393	223627	258005557	467615	1153	2360
9256	T1327C_28082007_D1_D2	61830094	61588724	0.39	83434	132988811	1907792	1593	5767
9256	T1117B_14042014_Q2_Q3	67665756	67402734	0.389	154413	221170584	387729	1432	3286
9256	T1357B_14042014_Q2_Q3	54231356	54020214	0.389	164427	260521139	626875	1584	4172
9256	T1500A_21012008_D1_D2	57952170	57728062	0.387	189443	261055543	400862	1378	3633
9256	T1246B_12062006_D1_D2	75998774	75716342	0.372	13266	31675261	934208	2387	22778
9256	T1060B_16042014_Q2_Q3	50206970	50023710	0.365	260131	310040397	523665	1191	2248
9256	T1525B_20042008_D1_D2	71306932	71047540	0.364	348697	363208932	580505	1041	1988
9256	T1664B_26032009_D1_D2	71602582	71341776	0.364	140380	189472728	480904	1349	3373
9256	T1060A_14022007_D1_D2	66979942	66745812	0.35	269511	294315546	478029	1092	1968
9256	T1049A_15042014_Q2_Q3	62390690	62172786	0.349	308742	383623725	798682	1242	2270
9256	T1560A_21012008_D1_D2	65754452	65525282	0.349	318915	368686834	761355	1156	2127
9256	T1006A_16042014_Q2_Q3	54051730	53865222	0.345	199092	204350996	723501	1026	1703
9256	T1357A_14042014_Q2_Q3	48077138	47911226	0.345	76673	93680916	604498	1221	2371
9256	T1420A_16042014_Q2_Q3	55305218	55119624	0.336	225025	289755251	752615	1287	2421
9256	T1337B_16042014_Q2_Q3	55744488	55573626	0.307	231020	315160281	817749	1364	2925
9256	T1664B_04122008_D1_D2	53722876	53562208	0.299	64193	97651336	306129	1521	3615
9256	T1246B_7032008_D1_D2	62434564	62262158	0.276	213010	293754017	791426	1379	3060
9256	T1351A_08022008_D1_D2	62198612	62027704	0.275	313173	398677988	1220807	1273	2656
9256	T1013B_18082006_D1_D2	56048580	55901928	0.262	149038	200443379	778349	1344	2779
9256	T1525A_20042008_D1_D2	56182782	56035920	0.261	304320	294409776	317165	967	1573
9256	T1560B_21012008_D1_D2	69505688	69324170	0.261	212252	269660265	1033386	1270	2363
9256	T1525A_16042014_Q2_Q3	51345514	51211970	0.26	311289	356196277	521774	1144	2128
9256	T1229B_16042014_Q2_Q3	60226628	60075564	0.251	283782	335848171	438849	1183	2222
9256	T1190A_01022008_D1_D2	61862032	61710522	0.245	206716	312512325	455777	1511	4206
9256	T1002A_14042014_Q2_Q3	55572410	55437918	0.242	100663	129823977	144684	1289	2526
9256	T1018A_26112006_D1_D2	57909828	57774548	0.234	249576	276487647	744084	1107	1969
9256	T1087B_06112006_D1_D2	61280412	61154252	0.206	430737	409567089	499348	950	1586
9256	T1018A_15042014_Q2_Q3	49217828	49118968	0.201	249710	319503534	693491	1279	2443
9256	T1469A_16042014_Q2_Q3	63551154	63424414	0.199	262670	332901107	677290	1267	2360
9256	T1198B_15052006_D1_D2	67139416	67008554	0.195	75263	130000408	1203937	1727	4806
9256	T1006B_16042014_Q2_Q3	49242638	49147808	0.193	112831	168113245	600598	1489	3382
9256	T1198B_10112006_D1_D2	59270128	59156884	0.191	218408	240831501	321796	1102	1897
9256	T1246A_14042014_Q2_Q3	54378372	54276362	0.188	199761	264817509	542158	1325	2571
9256	T1535B_14042014_Q2_Q3	62039448	61922782	0.188	142083	184269505	913200	1296	2580
9256	T1409A_16042014_Q2_Q3	71919208	71799100	0.167	111424	108656993	351096	975	1451
9256	T1229A_16042014_Q2_Q3	51354114	51269106	0.166	252966	338580014	530762	1338	2805
9256	T1071B_19102006_D1_D2	55763320	55673066	0.162	106498	141210853	543929	1325	3154
9256	T1236B_6072006_D1_D2	69101674	68989736	0.162	50948	77629412	1091786	1523	3834
9256	T1317A_15012007_D1_D2	69276240	69164664	0.161	184274	223492320	462090	1212	2193
9256	T1087A_06112006_D1_D2	56806794	56717186	0.158	329543	348937300	554444	1058	1850
9256	T1525B_16042014_Q2_Q3	51733602	51652174	0.157	301073	384779817	801258	1278	2515
9256	T1662A_14042014_Q2_Q3	62518722	62420764	0.157	170758	235106711	458675	1376	3171
9256	T1497A_15042014_Q2_Q3	63243846	63145454	0.156	123148	183056262	728359	1486	3761
9256	T1060B_1072005_D1_D2	73372858	73259510	0.154	14419	41575402	451036	2883	33568
9256	T1198A_10112006_D1_D2	79815044	79698632	0.146	150588	185158408	465585	1229	2492
9256	T1444B_21112007_D1_D2	65278102	65182844	0.146	129102	228003708	958931	1766	6179
9256	T1018B_26112006_D1_D2	85769648	85645966	0.144	354683	430006596	496645	1212	2423
9256	T1345B_22012007_D1_D2	52739886	52664864	0.142	77054	112710075	913961	1462	3636
9256	T1001A_14042014_Q2_Q3	66857562	66764386	0.139	249229	368054719	578012	1476	3679
9256	T1055B_25092006_D1_D2	52721958	52649184	0.138	111193	147210826	448448	1323	2600
9256	T1055A_25092006_D1_D2	52348794	52277236	0.137	135209	195196708	717015	1443	3961
9256	T1535A_14042014_Q2_Q3	58693432	58616090	0.132	183361	240405964	498649	1311	2630
9256	T1190B_30032006_D1_D2	60006796	59930530	0.127	30327	75838540	619075	2500	21495
9256	T1074B_15042014_Q2_Q3	54471332	54408150	0.116	201482	283298911	745571	1406	2833
9256	T1497B_15042014_Q2_Q3	55961082	55896746	0.115	228718	313407912	761975	1370	2607
9256	T1662B_14042014_Q2_Q3	56170440	56109216	0.109	212616	287710023	557251	1353	2881
9256	T1071A_19102006_D1_D2	61512900	61446232	0.108	95136	150198009	711113	1578	3999
9256	T1062A_26092005_D1_D2	77008896	76927634	0.106	23210	95750502	667301	4125	41689
9256	T1444A_21112007_D1_D2	67498382	67430634	0.1	116513	150556988	679003	1292	2548
9256	T1198A_15052006_D1_D2	62707550	62650232	0.091	69902	129117091	815309	1847	7562
9256	T1409B_16042014_Q2_Q3	68130846	68068788	0.091	73039	82502460	447615	1129	1885
9256	T1338A_05012007_D1_D2	53423470	53375162	0.09	163218	199796259	722086	1224	2367
9256	T1412A_14042014_Q2_Q3	68885436	68825592	0.087	130193	173402089	816914	1331	2602
9256	T1117A_24112005_D1_D2	71424312	71363444	0.085	45548	86713805	548116	1903	7260
9256	T1317B_15012007_D1_D2	70595132	70535562	0.084	141645	160866244	193346	1135	1906
9256	T1185B_27032006_D1_D2	70783270	70741472	0.059	24386	53768817	822862	2204	15105
9256	T1013A_18082006_D1_D2	67267694	67230208	0.056	92412	139619084	482339	1510	4129
9256	T1002B_17102005_D1_D2	72111138	72073590	0.052	71772	97231859	1176538	1354	3676
9256	T1016B_14062006_D1_D2	59158816	59127796	0.052	65212	91686941	387648	1405	7194
9256	T1062A_01062006_D1_D2	65431050	65399616	0.048	122107	164167325	1157038	1344	3824
9256	T1002A_17102005_D1_D2	75888468	75852964	0.047	47896	88167946	805860	1840	9145
9256	T1229A_2072006_D1_D2	70494114	70462584	0.045	25789	64372423	2646954	2496	15565
9256	T1229B_2072006_D1_D2	80057038	80022862	0.043	18785	48712605	1783845	2593	42532
9256	T1190B_01022008_D1_D2	70970510	70945200	0.036	65922	85705637	669026	1300	2778
9256	T1374A_27102008_D1_D2	78727500	78699496	0.036	26243	46319134	321116	1765	13858
9256	T1374B_27102008_D1_D2	65716116	65693908	0.034	83185	108822785	236653	1308	3167
9256	T1049B_4102005_D1_D2	61339294	61323798	0.025	17411	38977072	684889	2238	36050
9256	T1016A_14062006_D1_D2	69780804	69763732	0.024	56980	95262108	259188	1671	8029
9256	T1049A_4102005_D1_D2	67852766	67840226	0.018	24895	52417615	632659	2105	14056
9256	T1062B_26092005_D1_D2	64571370	64562878	0.013	4996	29986082	574709	6002	47194
6685	T1023A_1082005_D1_D2	54620816	54554244	0.122	125045	163916771	862954	1310	2533
6685	T1023A_30062015_Q2_Q3	55178658	44564016	19.237	252023	300586382	583612	1192	2304
6685	T1023A_30102006_D1_D2	62645600	62543970	0.162	286901	307562151	1395694	1072	1804
6685	T1023B_1082005_D1_D2	44999616	44973710	0.058	131386	237483147	707432	1807	7099
6685	T1023B_30062015_Q2_Q3	64685566	60399324	6.626	320418	391619574	325525	1222	2236
6685	T1023B_30102006_D1_D2	59923412	59762136	0.269	184437	186796914	864789	1012	1581
6685	T1028A_21072005_D1_D2	67554242	67541512	0.019	26649	54074481	1099228	2029	18165
6685	T1028A_3102006_D1_D2	64054628	63986300	0.107	83126	123522551	371067	1485	4566
6685	T1028A_8072015_Q2_Q3	65483210	31686076	51.612	142883	186723260	471612	1306	2417
6685	T1028B_21072005_D1_D2	74174844	74160982	0.019	34674	67538341	813787	1947	5647
6685	T1028B_3102006_D1_D2	68284554	68170272	0.167	208440	278421106	514864	1335	2852
6685	T1028B_8072015_Q2_Q3	51200920	30797646	39.849	311441	325108666	404330	1043	1778
6685	T1051A_15052006_D1_D2	74767644	74736514	0.042	55948	90847519	470193	1623	11116
6685	T1051A_2072015_Q2_Q3	77516870	46434294	40.098	223958	280554571	545319	1252	2430
6685	T1051A_9022006_D1_D2	66219034	66199126	0.03	152278	175368501	665122	1151	1958
6685	T1051B_15052006_D1_D2	62362306	62320128	0.068	89915	138838204	716125	1544	4932
6685	T1051B_2072015_Q2_Q3	55643164	40360520	27.465	162600	221342646	614647	1361	3096
6685	T1051B_9022006_D1_D2	75497984	75465778	0.043	86612	124647170	908511	1439	3991
6685	T1056A_07032007_D1_D2	50537468	50069120	0.927	370695	361141667	684355	974	1702
6685	T1056A_26072005_D1_S7	71368432	63579712	10.913	18416	32448779	525263	1761	5784
6685	T1056A_30092014_Q2_Q3	51079822	30112536	41.048	170973	239311435	382874	1399	3453
6685	T1056B_07032007_D1_D2	63075532	62103430	1.541	380134	409881367	621365	1078	2076
6685	T1056B_26072005_D1_D2	51444012	49371426	4.029	45865	64059304	1019028	1396	3308
6685	T1056B_30092014_Q2_Q3	71420766	57404856	19.624	137887	212750382	449066	1542	3925
6685	T1066A_1112005_D1_D2	53339904	53163196	0.331	116279	132585758	848151	1140	1894
6685	T1066A_2032007_D1_D2	76213696	76026268	0.246	213696	235662846	869084	1102	1951
6685	T1066A_6072015_Q2_Q3	66655042	23542896	64.679	186044	227957092	495601	1225	2187
6685	T1066B_1112005_D1_D2	34911378	34870696	0.117	73646	104007868	623218	1412	3728
6685	T1066B_2032007_D1_D2	57590178	57475500	0.199	241558	241016295	867856	997	1625
6685	T1066B_6072015_Q2_Q3	68837172	38562130	43.981	222464	265336866	360086	1192	2008
6685	T1121A_21092006_D1_D2	60095628	59906054	0.315	178181	236424077	436873	1326	2651
6685	T1121A_3072015_Q2_Q3	54544566	41178418	24.505	159223	191744666	454223	1204	2142
6685	T1121A_9032006_D1_D2	69318890	69261370	0.083	148720	159891830	591406	1075	1837
6685	T1121B_21092006_D1_D2	59216820	59190168	0.045	133906	152304530	431399	1137	2108
6685	T1121B_3072015_Q2_Q3	43705258	19719740	54.88	199343	224147322	510489	1124	1814
6685	T1121B_9032006_D1_D2	75871160	75833286	0.05	105755	137760533	948344	1302	2557
6685	T1135A_22122005_D1_D2	39390060	39376234	0.035	44950	70307031	1179596	1564	2712
6685	T1135A_7072015_Q2_Q3	55694392	39888968	28.379	141595	171345043	696164	1210	2188
6685	T1135A_9052007_D1_D2	78210160	77398546	1.038	332930	284521794	635205	854	1245
6685	T1135B_22122005_D1_D2	48287228	47931014	0.738	36168	75370483	813829	2083	10920
6685	T1135B_7072015_Q2_Q3	67892618	33327638	50.911	171226	197346168	802364	1152	2014
6685	T1135B_9052007_D1_D2	52585740	52374868	0.401	424616	312981678	541088	737	1067
6685	T1166A_2022006_D1_D2	66187958	66180598	0.011	46517	61414050	856780	1320	2394
6685	T1166A_29062007_D1_D2	76942072	76580510	0.47	187403	186801226	699867	996	1438
6685	T1166A_6072015_Q2_Q3	70157600	42526216	39.385	260383	270923361	702493	1040	1834
6685	T1166B_2022006_D1_D2	67034816	67022966	0.018	41292	72786154	786890	1762	7867
6685	T1166B_29062007_D1_D2	47364342	47106274	0.545	211868	261500662	423223	1234	2295
6685	T1166B_6072015_Q2_Q3	64121968	44733022	30.238	225691	262709904	687363	1164	2123
6685	T1183A_11032008_D1_D2	80390732	79174426	1.513	236281	253771539	605330	1074	1877
6685	T1183A_15032006_D1_D2	62264044	62216918	0.076	8176	27596239	369278	3375	13966
6685	T1183A_2072015_Q2_Q3	57815428	34030586	41.139	271106	295871902	306445	1091	1982
6685	T1183B_11032008_D1_D2	61414002	60612990	1.304	222889	224490083	473871	1007	1649
6685	T1183B_15032006_D1_D2	29092588	27916744	4.042	20654	38321365	423820	1855	17597
6685	T1183B_2072015_Q2_Q3	46303878	31585822	31.786	269811	298239233	393701	1105	1698
6685	T1215A_1072015_Q2_Q3	66569398	54657480	17.894	187907	263917125	297825	1404	3554
6685	T1215A_31052006_D1_D2	64787490	64731748	0.086	67970	134669729	495738	1981	9142
6685	T1215A_31052007_D1_D2	69748954	69035938	1.022	139270	176576881	681782	1267	3195
6685	T1215B_1072015_Q2_Q3	55188000	39462068	28.495	187573	224568881	364700	1197	2546
6685	T1215B_31052006_D1_D2	69494990	69451640	0.062	66049	109857037	443245	1663	5693
6685	T1215B_31052007_D1_D2	76187036	75378896	1.061	233043	270444860	857680	1160	2323
6685	T1230A_1072015_Q2_Q3	54203834	25782642	52.434	179652	192706996	350472	1072	1716
6685	T1230A_14032007_D1_D2	65438900	65068988	0.565	293604	293258949	546120	998	1686
6685	T1230A_8062006_D1_D2	58088674	58054638	0.059	26972	44876900	710421	1663	6770
6685	T1230B_1072015_Q2_Q3	54706068	40607574	25.771	250149	251530307	401292	1005	1861
6685	T1230B_14032007_D1_D2	58583406	58327306	0.437	263280	231854347	368450	880	1438
6685	T1230B_8062006_D1_D2	65747858	65674980	0.111	74571	105972913	620651	1421	2921
6685	T1247A_30102006_D1_D2	22942674	21040730	8.29	55461	88271484	1155079	1591	4139
6685	T1247A_6082007_D1_D2	55361898	53108976	4.069	208761	220997721	658923	1058	1864
6685	T1247A_9072015_Q2_Q3	55946876	36349996	35.028	137325	184296658	499022	1342	2992
6685	T1247B_30102006_D1_D2	72870388	72762960	0.147	41775	80675445	1136189	1931	16383
6685	T1247B_6082007_D1_D2	57612810	57493000	0.208	54540	49433461	1066589	906	1166
6685	T1247B_9072015_Q2_Q3	70323350	39704578	43.54	142683	178294481	343216	1249	2830
6685	T1261A_10072015_Q2_Q3	67347590	29960534	55.514	192697	273957104	702854	1421	3046
6685	T1261A_19072006_D1_D2	39586650	23644050	40.273	58549	76053893	704524	1298	1913
6685	T1261A_7082007_D1_D2	50492490	50043032	0.89	185564	202019956	771063	1088	1847
6685	T1261B_10072015_Q2_Q3	55091522	24099740	56.255	163093	206733366	1000074	1267	2606
6685	T1261B_19072006_D1_D2	47871592	31625468	33.937	13429	65502009	945983	4877	84890
6685	T1261B_7082007_D1_D2	53670390	51458520	4.121	261730	257821774	417763	985	1559
6685	T1284A_16032007_D1_D2	70117958	68980368	1.622	187767	204223769	901023	1087	1996
6685	T1284A_28062007_D1_D2	58454000	56431056	3.461	103686	116925012	329509	1127	1803
6685	T1284A_8072015_Q2_Q3	56221384	38201596	32.051	301438	340476613	340727	1129	1872
6685	T1284B_16032007_D1_D2	46350246	43848020	5.399	136264	156834465	714903	1150	2021
6685	T1284B_28062007_D1_D2	48788898	47930520	1.759	106480	133853343	597290	1257	2826
6685	T1284B_8072015_Q2_Q3	54449832	40346074	25.902	233015	285900791	243372	1226	2088
6685	T1291A_14042014_Q2_Q3	78053580	77952668	0.129	131205	192116817	760055	1464	3377
6685	T1291A_16032008_D1_D2	50818182	49244262	3.097	272731	303994305	530525	1114	2029
6685	T1291A_26082006_D1_D2	56947368	56506718	0.774	14536	44907622	550585	3089	19227
6685	T1291B_14042014_Q2_Q3	57326712	57181484	0.253	203788	315213039	1018760	1546	4179
6685	T1291B_16032008_D1_D2	62711372	62150266	0.895	334600	364032800	548343	1087	2037
6685	T1291B_26082006_D1_D2	45965166	45440018	1.142	19060	36158811	533407	1897	15794
6685	T1366A_10122007_D1_D2	60848620	59178236	2.745	149405	197286186	519709	1320	2684
6685	T1366A_21122006_D1_D2	77657266	74875862	3.582	27163	63672658	410182	2344	14545
6685	T1366A_30062015_Q2_Q3	69617888	51930304	25.407	262671	323726239	630742	1232	2547
6685	T1366B_10122007_D1_D2	52480496	51684574	1.517	185847	211463140	475496	1137	2034
6685	T1366B_21122006_D1_D2	60423600	54287312	10.155	53443	97573216	560257	1825	6914
6685	T1366B_30062015_Q2_Q3	48402042	28496100	41.126	231882	286124745	228662	1233	2234
6685	T1389A_22012007_D1_D2	59990450	59859374	0.218	282524	280442687	409415	992	1771
6685	T1389A_23072007_D1_D2	51238352	50579084	1.287	299858	287118190	296967	957	1402
6685	T1389A_9042015_Q2_Q3	71455272	59912004	16.155	106761	176250553	1021971	1650	5246
6685	T1389B_22012007_D1_D2	64535602	64277882	0.399	221966	256925699	480251	1157	2449
6685	T1389B_23072007_D1_D2	45204298	45025088	0.396	204176	231330328	467940	1132	1785
6685	T1389B_9042015_Q2_Q3	63237882	54733412	13.448	207735	262474190	401752	1263	2651
6685	T1393A_23012007_D1_D2	63305740	62703104	0.952	213568	224355879	288041	1050	1959
6685	T1393A_3072015_Q2_Q3	86200104	73442298	14.8	183708	276859029	415476	1507	4022
6685	T1393A_3102007_D1_D2	56615158	56003034	1.081	176045	211482626	454024	1201	2399
6685	T1393B_23012007_D1_D2	60471690	59421118	1.737	201131	230163460	697060	1144	2242
6685	T1393B_3072015_Q2_Q3	59658044	35652366	40.239	127715	183203015	385512	1434	3328
6685	T1393B_3102007_D1_D2	59298820	56729186	4.333	211757	264466798	517015	1248	2311
6685	T1416A_15042014_Q2_Q3	73392558	71093806	3.132	105899	150843923	486834	1424	3416
6685	T1416A_20112007_D1_D2	68330482	64932404	4.973	85130	116331875	504432	1366	3455
6685	T1416A_21042007_D1_D2	68754022	67992994	1.107	36348	66509367	694776	1829	10614
6685	T1416B_15042014_Q2_Q3	81581856	81458686	0.151	119685	124666583	323195	1041	1458
6685	T1416B_20112007_D1_D2	57599000	55395388	3.826	138010	166541946	390673	1206	2353
6685	T1416B_21042007_D1_D2	51470438	48177800	6.397	52756	98853055	543425	1873	8684
6685	T1447A_15032007_D1_D2	61916054	56779716	8.296	39744	60032393	594358	1510	5353
6685	T1447A_4082008_D1_D2	63411730	63241800	0.268	346779	445022132	453378	1283	2531
6685	T1447B_15032007_D1_D2	55224706	50583186	8.405	53493	76543923	1051820	1430	3655
6685	T1447B_4082008_D1_D2	48004698	47781474	0.465	256620	309483455	435993	1205	2565
6685	T1459A_14112007_D1_D2	49687608	49487476	0.403	213505	221314371	837190	1036	1845
6685	T1459A_22052015_Q2_Q3	58865928	51308338	12.839	265965	335459403	473563	1261	3129
6685	T1459A_7032007_D1_D2	48642402	35878282	26.241	58569	88573658	249027	1512	3950
6685	T1459B_14112007_D1_D2	73886476	73662262	0.303	233789	272925020	526934	1167	2164
6685	T1459B_22052015_Q2_Q3	67599714	59660550	11.744	188039	248189086	780451	1319	2882
6685	T1459B_7032007_D1_D2	67287908	66269286	1.514	107295	190482081	730265	1775	6390
6685	T1512A_10042007_D1_D2	60668580	58588652	3.428	112239	177467267	707884	1581	5769
6685	T1512A_14042008_D1_D2	61365198	60054680	2.136	342839	330498905	427409	964	1434
6685	T1512A_29092014_Q2_Q3	66622800	35676752	46.45	102299	119158186	334091	1164	1852
6685	T1512B_10042007_D1_D2	74719358	73470574	1.671	125094	189426312	718703	1514	4119
6685	T1512B_14042008_D1_D2	62471040	61498376	1.557	313422	303813410	349684	969	1561
6685	T1512B_29092014_Q2_Q3	58798014	23440386	60.134	218298	222532385	461607	1019	1496
6685	T1567A_01102014_Q2_Q3	56118418	38793352	30.872	165119	230743376	923322	1397	3613
6685	T1567A_07062007_D1_D2	54502388	53633730	1.594	33163	50666354	578887	1527	4292
6685	T1567A_26112007_D1_D2	88093976	87140882	1.082	78430	96061230	399642	1224	2133
6685	T1567B_01102014_Q2_Q3	68434768	53627832	21.637	98328	150356586	406617	1529	4775
6685	T1567B_07062007_D1_D2	63028400	58729250	6.821	41697	68201006	303679	1635	4751
6685	T1567B_26112007_D1_D2	89997862	89678704	0.355	104018	123221766	671356	1184	2486
6685	T1593A_13052008_D1_D2	43016394	41298580	3.993	266945	235548276	274949	882	1469
6685	T1593A_15042014_Q2_Q3	71324238	70538638	1.101	178817	242356904	828375	1355	2750
6685	T1593A_2092007_D1_D2	53383462	47461386	11.093	106760	121399825	324570	1137	2449
6685	T1593B_13052008_D1_D2	56592000	55627432	1.704	247110	279520872	432730	1131	2178
6685	T1593B_15042014_Q2_Q3	75320436	74655612	0.883	275089	314704262	607936	1144	2154
6685	T1593B_2092007_D1_D2	48013370	43453452	9.497	101588	124952240	499992	1229	2539
6685	T1594A_23072007_D1_D2	49674492	47823518	3.726	41856	75522268	499939	1804	6719
6685	T1594A_24042015_Q2_Q3	58780680	34190898	41.833	235521	285356357	490012	1211	2416
6685	T1594A_4072008_D1_D2	53250234	52195398	1.981	465929	406324605	416107	872	1410
6685	T1594B_23072007_D1_D2	51896584	47679946	8.125	34245	60786449	292207	1775	4867
6685	T1594B_24042015_Q2_Q3	70069738	27968212	60.085	195700	226336248	403226	1156	2063
6685	T1594B_4072008_D1_D2	53139824	52134048	1.893	203270	178302819	269284	877	1302
6685	T1602A_10082007_D1_D2	62440774	61895642	0.873	20082	49609994	965208	2470	23518
6685	T1602A_18072014_Q2_Q3	83670990	42575070	49.116	194528	274158557	589837	1409	3448
6685	T1602A_28032008_D1_D2	58339926	58261262	0.135	162576	184130588	395438	1132	2072
6685	T1602B_10082007_D1_D2	67821660	67580562	0.355	36377	62355167	612318	1714	7406
6685	T1602B_18072014_Q2_Q3	71545840	58199780	18.654	178858	254060482	547785	1420	3643
6685	T1602B_28032008_D1_D2	69332866	68720870	0.883	180707	211930069	538370	1172	2371
6685	T1636A_30062015_Q2_Q3	65592220	52883422	19.375	274435	318351329	1087018	1160	2614
6685	T1636A_7012008_D1_D2	55684794	55213098	0.847	94284	134980634	433307	1431	3614
6685	T1636A_8072008_D1_D2	66481316	65906062	0.865	157362	180798888	325358	1148	1986
6685	T1636B_30062015_Q2_Q3	55068444	25079658	54.457	214944	235296306	312094	1094	2041
6685	T1636B_7012008_D1_D2	47062006	46839250	0.473	106349	150903979	342221	1418	3113
6685	T1636B_8072008_D1_D2	54684828	54146678	0.984	102493	156947300	944041	1531	4397
6685	T1653A_12082008_D1_D2	35073244	34572820	1.427	54689	90608663	637326	1656	4084
6685	T1653A_14052009_D1_D2	82565936	80938474	1.971	172798	234648318	728784	1357	3375
6685	T1653A_15042014_Q2_Q3	69059854	68975198	0.123	304872	353515757	579177	1159	2161
6685	T1653B_12082008_D1_D2	60048204	57142936	4.838	30457	75328069	1567846	2473	16721
6685	T1653B_14052009_D1_D2	73226844	72355108	1.19	171057	192590693	728608	1125	1979
6685	T1653B_15042014_Q2_Q3	77040324	76871528	0.219	279578	347574130	899244	1243	2788
6685	T1657A_14042014_Q2_Q3	63580516	60431844	4.952	149601	152541372	308547	1019	1800
6685	T1657A_22072008_D1_D2	72427834	71730794	0.962	55663	89000315	487783	1598	4490
6685	T1657A_30092010_D1_D2	64693742	64621522	0.112	216302	217308914	670982	1004	1700
6685	T1657B_14042014_Q2_Q3	385400	339702	11.857	7831	5556493	7015	709	819
6685	T1657B_22072008_D1_D2	60559298	59522528	1.712	63409	101454725	584808	1600	4886
6685	T1657B_30092010_D1_D2	60788918	60401748	0.637	214371	220981502	736508	1030	1532
6685	T1671A_15122010_D1_D2	62475894	62005136	0.754	217224	300085343	799318	1381	3618
6685	T1671A_20042015_Q2_Q3	51484046	39967510	22.369	193063	195526107	267811	1012	1577
6685	T1671A_22032010_D1_D2	79627800	77889840	2.183	91765	160791022	591682	1752	6705
6685	T1671B_15122010_D1_D2	66255730	65475864	1.177	185015	259170102	640074	1400	3666
6685	T1671B_20042015_Q2_Q3	63920710	35176038	44.969	221871	263616569	373425	1188	2446
6685	T1671B_22032010_D1_D2	63476116	62543862	1.469	105472	167438530	747128	1587	5505
Min		385400	339702	0.011	4996	5556493	7015	709	819
Max		118719780	117369122	90.216	465929	445022132	2646954	6002	84890
Mean		6.00662e+07	5.31005e+07	12.0324	150280	1.87104e+08	582257	1392.38	4244.01

## Sheet: S2 ARGs identified
Table S2: Antimicrobial resitsance genes identified in our cohort. Genes were filtered by coverage (>70% ) and identity (80%) and manually curated to avoid duplication across databases.
Gene	Drug Class	Mechanism
mef(A)	Macrolide	efflux
msr(D)	Macrolide	target protection
RlmA(II)	Macrolide/Lincosamide	target alteration
patA	Fluoroquinolone	efflux
pmrA	MDR	efflux
patB	Fluoroquinolone	efflux
tetB(46)	Tetracycline	efflux
tetA(46)	Tetracycline	efflux
emrR	MDR	efflux
mtrD	MDR	efflux
marA	MDR	efflux
oqxA10	Phenicol/Quinolone	efflux
blaTEM-1	Beta-Lactam	inactivation
msbA	MDR	efflux
cpxA	MDR	efflux
ramA	MDR	efflux
penA	Beta-Lactam	inactivation
macB	Macrolide	efflux
bacA	Peptide	target alteration
baeR	MDR	efflux
cfxA3	Beta-Lactam	inactivation
acrD	MDR	efflux
acrA	MDR	efflux
mdtC	MDR	efflux
acrB	MDR	efflux
mdtB	MDR	efflux
KpnH	MDR	efflux
mef(E)	Macrolide	efflux
aadA27	Aminoglycoside	inactivation
tetA(60)	Tetracycline	efflux
MexF	MDR	efflux
tetB(60)	Tetracycline	efflux
dfrE	Trimethoprim	target replacement
KpnG	MDR	efflux
blaI	Beta-Lactam	inactivation
mexQ	MDR	efflux
blaCIA-4	Beta-Lactam	inactivation
tet(O)	Tetracycline	target protection
KpnE	MDR	efflux
lsa(A)	Lincosamide/Streptogramin	target protection
KpnF	MDR	efflux
blaOXA-282	Beta-Lactam	inactivation
dfrC	Trimethoprim	target replacement
mgrA	MDR	efflux
blaSPR-1	Beta-Lactam	inactivation
blaADC-32	Beta-Lactam	inactivation
mdfA	MDR	efflux
tolC	MDR	efflux
blaOXA-64	Beta-Lactam	inactivation
lsa(C)	Lincosamide/Streptogramin	target protection
emrB	MDR	efflux
emrE	MDR	efflux
emeA	MDR	efflux
efrB	MDR	efflux
blaOXA-284	Beta-Lactam	inactivation
hmrM	MDR	efflux
blaR1	Beta-Lactam	inactivation
efrA	MDR	efflux
ampH	Beta-Lactam	inactivation
acrS	MDR	efflux
sul2	Sulfonamide	target replacement
blaOXY-6-1	Beta-Lactam	inactivation
gadW	MDR	efflux
kdpE	Aminoglycoside	efflux
catP	Chloramphenicol	inactivation
qacA	MDR	efflux
tet(42)	Tetracycline	efflux
MexD	MDR	efflux
abeS	MDR	efflux
blaOXY-2-1	Beta-Lactam	inactivation
fusC	Fusidic Acid	target protection
CpxR	MDR	efflux
ant(3'')-IIa	Aminoglycoside	inactivation
blaSHV-178	Beta-Lactam	inactivation
blaOXA-212	Beta-Lactam	inactivation
vanZ-F	Vancomycin	target alteration
pmrF	MDR	efflux
catA16	Chloramphenicol	inactivation
vanR-O	Vancomycin	target alteration
eptA	Peptide	efflux
emrA	MDR	efflux
mdtH	MDR	efflux
blaOXY-1-3	Beta-Lactam	inactivation
mdtA	MDR	efflux
mdtP	MDR	efflux
msr(C)	MLS	target protection
mdtN	MDR	efflux
mdtG	MDR	efflux
blaCMY-72	Beta-lactam	inactivation
acrE	MDR	efflux
cfxA4	Beta-Lactam	inactivation
mdtE	MDR	efflux
acrF	MDR	efflux
ugd	Peptide	efflux
baeS	MDR	efflux
blaIND-11	Beta-Lactam	inactivation
msr(A)	MLS	target protection
MexB	MDR	efflux
abeM	MDR	efflux
evgA	MDR	efflux
emrK	MDR	efflux
evgS	MDR	efflux
mdtO	MDR	efflux
emrY	MDR	efflux
tet(32)	Tetracycline	target protection
mdtF	MDR	efflux
mecA	Beta-Lactam	inactivation
erm(C)	MLS	target alteration
APH(6)-Id	Aminoglycoside	inactivation
tet(B)	Tetracycline	efflux
adeL	MDR	efflux
AbaF	MDR	efflux
blaOXY-1-1	Beta-Lactam	inactivation
blaOXA-816	Beta-Lactam	inactivation
adeN	MDR	efflux
fosB	Fosfomycin	inactivation
smeE	MDR	efflux
blaOXY-2-10	Beta-lactam	inactivation
tet(W)	Tetracycline	target protection
adeK	MDR	efflux
AbaQ	MDR	efflux
adeI	MDR	efflux
AmvA	MDR	efflux
mecR1	Beta-Lactam	inactivation
bla2	Beta-Lactam	inactivation
blaROB-1	Beta-Lactam	inactivation
adeH	MDR	efflux
blaACT-12	Beta-Lactam	inactivation
adeJ	MDR	efflux
mecI	Beta-Lactam	inactivation
lnu(A)	Lincosamide	inactivation
AAC(6')-Ie-APH(2'')-Ia	Aminoglycoside	inactivation
blaSHV-40	Beta-lactam	inactivation
smeD	MDR	efflux
macA	Macrolide	efflux
adeS	MDR	efflux
FosA2	Fosfomycin	inactivation
adeG	MDR	efflux
farA	MDR	efflux
mexW	MDR	efflux
adeF	MDR	efflux
bla1	Beta-Lactam	inactivation
mtrE	MDR	efflux
norA	MDR	efflux
blaOXY-6-4	Beta-Lactam	inactivation
blaSHV-187	Beta-Lactam	inactivation
blaOXA-285	Beta-Lactam	inactivation
farB	MDR	efflux
mdtM	MDR	efflux
blaLEN-10	Beta-lactam	inactivation
mupA	Mupirocin	target alteration
tet(45)	Tetracycline	efflux
adeR	MDR	efflux
erm(F)	MLS	target alteration
satA	Streptothricin	inactivation
blaOXA-362	Beta-Lactam	inactivation
smeF	MDR	efflux
blaTER-2	Beta-Lactam	inactivation
ar0	#N/A	#N/A
sat4	Streptothricin	inactivation
blaPLA-3	Beta-Lactam	inactivation
smeC	MDR	efflux
mexK	MDR	efflux
blaSHV-36	Beta-Lactam	inactivation
tet(38)	Tetracycline	efflux
blaBPU-1	Beta-Lactam	inactivation
smeS	MDR	efflux
smeB	MDR	efflux
FosA6	Fosfomycin	inactivation
smeA	MDR	efflux
dfrG	Trimethoprim	target replacement
vanR-C	Vancomycin	target alteration
str	Aminoglycoside	target alteration
CfxA5	Beta-Lactam	inactivation
smeR	MDR	efflux
gadX	MDR	efflux
blaOXA-651	Beta-Lactam	inactivation
vanR-A	Vancomycin	target alteration
blaCMY-51	Beta-Lactam	inactivation
vanS-C	Vancomycin	target alteration
catA8	Chloramphenicol	inactivation
blaMIR-18	Beta-Lactam	inactivation
mcr-9.1	Peptide	inactivation
APH(3')-IIIa	Aminoglycoside	inactivation
mphB	Macrolide	inactivation
OprZ	MDR	efflux
catA2	Chloramphenicol	inactivation
AxyX	MDR	efflux
mepR	MDR	efflux
vanC	Vancomycin	target alteration
blaSHV-107	Beta-lactam	inactivation
tet(K)	Tetracycline	efflux
vanT-C	Vancomycin	target alteration
AxyY	MDR	efflux
arlR	MDR	efflux
blaCIA-3	Beta-Lactam	inactivation
vanY-Pt	Vancomycin	target alteration
arlS	MDR	efflux
cfr(B)	MDR	efflux
blaOXA-334	Beta-Lactam	inactivation
blaOXA-283	Beta-Lactam	inactivation
mepA	MDR	efflux
mexI	MDR	efflux
TriC	MDR	efflux
mphL	Macrolide	inactivation
mph(C)	MDR	inactivation
fusD	Fusidic Acid	target protection
LmrS	MDR	efflux
blaESP-1	Beta-Lactam	inactivation
vanXY-C	Vancomycin	target alteration
lsa(B)	Lincosamide/Streptogramin	target protection
blaACT-67	Beta-Lactam	inactivation
aadS	Aminoglycoside	inactivation
erm(B)	MLS	target alteration
blaCMY-82	Beta-lactam	inactivation
blaSHV-75	Beta-Lactam	inactivation
catA7	Chloramphenicol	inactivation
blaOXY-1-4	Beta-Lactam	inactivation
aph(3')-IIc	Aminoglycoside	inactivation
blaIND-2a	Beta-Lactam	inactivation
blaOXA-361	Beta-Lactam	inactivation
blaL2	Beta-Lactam	inactivation
blaCSP-1	Beta-Lactam	inactivation
tet(Q)	Tetracycline	target protection
bla-C	Beta-Lactam	inactivation
FosA7	Fosfomycin	inactivation
aadA2	Aminoglycoside	inactivation
blaOXA-50	Beta-lactam	inactivation
cfr-Cb	MLS	target alteration
OpmH	MDR	efflux
blaHER-1	Beta-lactam	inactivation
mdtK	MDR	efflux
mexN	MDR	efflux
soxR	MDR	efflux
OprM	MDR	efflux
catA1	Chloramphenicol	inactivation
OprJ	MDR	efflux
PmpM	MDR	efflux
APH(3')-IIb	Aminoglycoside	inactivation
qnrE1	Fluoroquinolone	target protection
MexC	MDR	efflux
MexE	MDR	efflux
OprN	MDR	efflux
ArmR	MDR	efflux
catB	Chloramphenicol	inactivation
lnu(AN2)	Lincosamide	inactivation
blaACT-55	Beta-Lactam	inactivation
blaACT-4	Beta-Lactam	inactivation
MuxC	MDR	efflux
blaOXY-2-8	Beta-lactam	inactivation
MuxB	MDR	efflux
erm(X)	MLS	target alteration
fosA	Fosfomycin	inactivation
blaOXY-6-2	Beta-Lactam	inactivation
blaSHV-211	Beta-lactam	inactivation
blaACT-15	Beta-Lactam	inactivation
Mef(En2)	Macrolide	efflux
APH(3')-VI	Aminoglycoside	inactivation
aac(6')-Iid	Aminoglycoside	inactivation
blaL1	Beta-Lactam	inactivation
cfxA	Beta-Lactam	inactivation
sul1	Sulfonamide	target replacement
mexL	MDR	efflux
blaRm3	Beta-lactam	inactivation
mexG	MDR	efflux
FosA5	Fosfomycin	inactivation
basS	Peptide	efflux
mexH	MDR	efflux
MexA	MDR	efflux
bcr-1	MDR	efflux
blaOXA-217	Beta-lactam	inactivation
TriA	MDR	efflux
mexV	MDR	efflux
fusB	Fusidic Acid	target protection
blaTHIN-B	Beta-lactam	inactivation
ampC	Beta-Lactam	inactivation
mexX	MDR	efflux
blaCPS-1	Beta-Lactam	inactivation
MuxA	MDR	efflux
mexY	MDR	efflux
blaOXA-494	Beta-Lactam	inactivation
opmE	MDR	efflux
mexJ	MDR	efflux
AAC(6')-Iy	Aminoglycoside	inactivation
blaOXY-1-2	Beta-Lactam	inactivation
TriB	MDR	efflux
blaACC-1a	Beta-Lactam	inactivation
OpmB	MDR	efflux
opmD	MDR	efflux
mexP	MDR	efflux
mexM	MDR	efflux
ANT(3'')-IIc	Aminoglycoside	inactivation
blaTEM-2	Beta-Lactam	inactivation
blaCSA-2	Beta-lactam	inactivation
blaOCH-5	Beta-Lactam	inactivation
blaOXA-85	Beta-Lactam	inactivation
blaTEM-19	Beta-Lactam	inactivation
ileS	Mupirocin	target alteration
aph(3'')-Ib	Aminoglycoside	inactivation
oqxB5	Phenicol/Quinolone	efflux
lmrP	MDR	efflux
tet(A)	Tetracycline	efflux
blaOXA-496	Beta-lactam	inactivation
blaACT-13	Beta-Lactam	inactivation
blaOXA-646	Beta-lactam	inactivation
ant(6)-Ia	Aminoglycoside	inactivation
blaPDC-374	Beta-Lactam	inactivation
aph(3')-Ia	Aminoglycoside	inactivation
aac(3)-II	Aminoglycoside	inactivation
AAC(3)-IId	Aminoglycoside	inactivation
AAC(6')-Iih	Aminoglycoside	inactivation
AAC(6')-Iz	Aminoglycoside	inactivation
aacA-ACI7	Aminoglycoside	inactivation
aadA5	Aminoglycoside	inactivation
aadA6	Aminoglycoside	inactivation
adeA	Tetracycline	efflux
adeB	MDR	efflux
adeC	Tetracycline	efflux
amrA	Aminoglycoside	efflux
amrB	Aminoglycoside	efflux
ant(9)-Ia	Aminoglycoside	inactivation
APH(2'')-If	Aminoglycoside	inactivation
APH(3')-Ib	Aminoglycoside	inactivation
APH(3')-VIa	Aminoglycoside	inactivation
arr	Rifampicin	inactivation
bla-A	Beta-Lactam	inactivation
blaACI-1	Beta-Lactam	inactivation
blaACT-1	Beta-Lactam	inactivation
blaACT-10	Beta-lactam	inactivation
blaACT-2	Beta-Lactam	inactivation
blaACT-28	Beta-Lactam	inactivation
blaACT-37	Beta-Lactam	inactivation
blaACT-59	Beta-Lactam	inactivation
blaADC-8	Beta-Lactam	inactivation
blaCARB-16	Beta-Lactam	inactivation
blaCARB-8	Beta-Lactam	inactivation
blaCFE-1	Beta-Lactam	inactivation
blaCGA-1	Beta-Lactam	inactivation
blaCGB-1	Beta-Lactam	inactivation
blaCTX-M-115	Beta-Lactam	inactivation
blaCTX-M-177	Beta-Lactam	inactivation
blaEBR-1	Beta-Lactam	inactivation
blaFOX-4	Beta-Lactam	inactivation
blaGPC-1	Beta-Lactam	inactivation
blaHER-5	Beta-Lactam	inactivation
blaIND-1	Beta-lactam	inactivation
blaIND-2	Beta-Lactam	inactivation
blaLEN-13	Beta-Lactam	inactivation
blaLEN-2	Beta-Lactam	inactivation
blaMIR-15	Beta-Lactam	inactivation
blaMIR-22	Beta-Lactam	inactivation
blaMIR-3	Beta-Lactam	inactivation
blaMOX-12	Beta-Lactam	inactivation
blaMOX-13	Beta-Lactam	inactivation
blaMOX-8	Beta-Lactam	inactivation
blaORN-1	Beta-lactam	inactivation
blaOXA-1	Beta-Lactam	inactivation
blaOXA-120	Beta-Lactam	inactivation
blaOXA-134	Beta-Lactam	inactivation
blaOXA-211	Beta-Lactam	inactivation
blaOXA-275	Beta-Lactam	inactivation
blaOXA-276	Beta-Lactam	inactivation
blaOXA-278	Beta-Lactam	inactivation
blaOXA-280	Beta-lactam	inactivation
blaOXA-281	Beta-lactam	inactivation
blaOXA-293	Beta-lactam	inactivation
blaOXA-309	Beta-lactam	inactivation
blaOXA-333	Beta-lactam	inactivation
blaOXA-355	Beta-Lactam	inactivation
blaOXA-427	Beta-Lactam	inactivation
blaOXA-459	Beta-lactam	inactivation
blaOXA-488	Beta-Lactam	inactivation
blaOXA-500	Beta-lactam	inactivation
blaOXA-669	Beta-Lactam	inactivation
blaOXA-674	Beta-Lactam	inactivation
blaOXA-78	Beta-Lactam	inactivation
blaOXY-2-11	Beta-lactam	inactivation
blaOXY-2-7	Beta-lactam	inactivation
blaOXY-3-1	Beta-lactam	inactivation
blaOXY-5-1	Beta-Lactam	inactivation
blaOXY-5-2	Beta-Lactam	inactivation
blaPDC-34	Beta-Lactam	inactivation
blaPDC-55	Beta-Lactam	inactivation
blaPLA-2a	Beta-lactam	inactivation
blaRAHN	Beta-Lactam	inactivation
blaSGM-7	Beta-Lactam	inactivation
blaSHV-110	Beta-Lactam	inactivation
blaTEM-150	Beta-Lactam	inactivation
blaTEM-160	Beta-Lactam	inactivation
catA4	Chloramphenicol	inactivation
ceoA	Aminoglycoside/Fluoroquinolone	efflux
ceoB	MDR	efflux
cepA	Beta-Lactam	inactivation
cmlA1	Phenicol	efflux
cmlB1	Chloramphenicol	efflux
cmx	Phenicol	efflux
cphA5	Beta-Lactam	inactivation
erm(A)	Macrolide	target alteration
erm(T)	MLS	target alteration
floR	Chloramphenicol	efflux
FosD	Fosfomycin	inactivation
iri	Rifampicin	inactivation
lmrD	Lincosamide	efflux
lnu(C)	Lincosamide	inactivation
lnu(D)	Lincosamide	inactivation
lsa(E)	Lincosamide/Streptogramin	target protection
mcr-3.1	Peptide	target alteration
mcr-3.17	Peptide	target alteration
mef(B)	Macrolide	efflux
mph(E)	Macrolide	inactivation
mphO	Macrolide	inactivation
mprF	Peptide	target alteration
msr(E)	Macrolide	target protection
mtrA	MDR	efflux
opcM	Aminoglycoside/Fluoroquinolone	efflux
oqxB	Phenicol/Quinolone	efflux
qacH	MDR	efflux
qnrB11	Fluoroquinolone	target protection
QnrB33	Fluoroquinolone	target protection
QnrB35	Fluoroquinolone	target protection
rosA	Peptide	efflux
rosB	Peptide	efflux
rpoB	Rifampicin	target alteration and replacement
sal(A)	MLS	target protection
sat2	Streptothricin	inactivation
tet(30)	Tetracycline	efflux
tet(41)	Tetracycline	efflux
tet(H)	Tetracycline	efflux
tet(J)	Tetracycline	efflux
tet(L)	Tetracycline	efflux
tet(S)	Tetracycline	target protection
tet(X)	Tetracycline	inactivation
tetA(P)	Tetracycline	efflux
tetB(P)	Tetracycline	target protection
vanR-I	Vancomycin	target alteration
vanZ-A	Vancomycin	target alteration
vat(F)	Streptogramin	inactivation

## Sheet: S3 DAA Time
Table S3: Differential abundance analysis (MaAsLin2) of the impact of time/stage of dental development on the abundance (TPM) of ARGs. Analysis was performed on ARGs above a minimum prevalence of 0.01%, present in at least 20% of the samples, which had been normalised by total sum scaling (TSS) and log transformed.
ARG	Time point	coef	st derr	N	N.not.0	pval	qval
mef(A)	T3	-0.0416978	0.00897881	535	520	4.70013e-06	1.7918e-05		Note: Reference level is T1, resulting in comparison of T1 vs T2 and T1 vs T3.
msr(D)	T3	-0.0313396	0.00641472	535	510	1.51441e-06	6.96629e-06		Note: Negative coefficient values indicate ARG is more abundant at T1 compared to either T2 or T3.
tetA(46)	T3	-0.0259678	0.00206306	535	267	5.55846e-31	6.39223e-30		Note: Positive coefficient values indicate ARG is more abundant at T2 or T3 compared to T1.
tetB(46)	T3	-0.0257142	0.0021199	535	266	4.57159e-30	4.20586e-29
bacA	T3	-0.0229469	0.00574383	535	147	7.37913e-05	0.00019967
RlmA(II)	T2	-0.0214425	0.00656323	535	517	0.0011821	0.00258935
tetA(46)	T2	-0.0186669	0.00213914	535	267	6.41473e-17	4.91796e-16
tetB(46)	T2	-0.0185869	0.00219798	535	266	2.67007e-16	1.75462e-15
patA	T2	-0.0156213	0.00486756	535	492	0.00141101	0.0029503
patB	T2	-0.0119605	0.0039454	535	496	0.00255197	0.00489128
mef(E)	T3	-0.00651468	0.00140585	535	138	5.06377e-06	1.7918e-05
tetA(60)	T3	-0.00530422	0.00112477	535	261	3.07989e-06	1.28795e-05
mef(E)	T2	-0.00321133	0.00145792	535	138	0.028261	0.0448279
tet(Q)	T3	0.000959181	0.000267466	535	193	0.000366478	0.000936554
APH(6)-Id	T3	0.0071428	0.00308377	535	138	0.0209234	0.0356473
penA	T2	0.0107203	0.00476645	535	354	0.0249129	0.0409283
APH(6)-Id	T2	0.0112761	0.00319736	535	138	0.000457127	0.00110673
blaCSP-1	T3	0.0113766	0.001993	535	162	2.3185e-08	1.18501e-07
sul2	T2	0.0114278	0.0040517	535	184	0.00497407	0.00880028
penA	T3	0.0153465	0.00459712	535	354	0.000902016	0.00207464
sul2	T3	0.0164142	0.00390776	535	184	3.12382e-05	8.98098e-05
macB	T2	0.0174483	0.00549743	535	441	0.00159099	0.00318199
tet(32)	T3	0.0201534	0.0029608	535	152	2.70043e-11	1.55275e-10
blaTEM-1	T2	0.0209614	0.00734127	535	242	0.00446762	0.00822042
cfxA3	T3	0.0305052	0.00677045	535	300	8.14126e-06	2.49665e-05
cfxA3	T2	0.0320264	0.00701983	535	300	6.28848e-06	2.06621e-05
macB	T3	0.0795422	0.00530214	535	441	1.10797e-42	1.69888e-41
macA	T3	0.0887195	0.00485744	535	388	3.24254e-58	1.49157e-56
lsa(C)	T3	0.100662	0.00621046	535	371	2.79029e-44	6.41767e-43

## Sheet: S4 a_div predictor & pairwise
Table S4.1: Relationship between resistome composition (Shannon ARG) and Microbiome/species composition (Shannon SP). Age and gender were not adjusted for because neither were found to have a significant effect.
	Shannon SP	N	Coef	se	p-value
Shannon ARG	(Predictor)
(Outcome)
Time 1	Time 1	139	0.316	0.049	<0.001
Time 2	Time 1	121	-0.075	0.051	0.144
Time 3	Time 1	136	-0.05	0.037	0.185
Time 2	Time 2	178	0.514	0.117	<0.001
Time 3	Time 2	172	-0.027	0.076	0.728
Time 3	Time 3	207	0.323	0.088	<0.001
Table S4.2: Summary statistics for changes over time.
	T2 – T1 (N = 110)				T3 – T1 (N = 122)				T3 – T2 (N =166)
	Mean	SD	% change	p-value	Mean	SD	% change	p-value	Mean	SD	% change	p-value
Richness nomdep	5.65	7.68	33.7	<0.0001	-2.11	7.03	-12.8	0.0012	-8.99	7.29	-39.6	<0.0001
TPM nomdep	0.06	0.89	0.51	0.45	-0.2	1.03	-1.6	0.0302	-0.12	0.82	-0.98	0.0506
Shannon ARG	0.33	0.52	16.7	<0.0001	0.17	0.56	8.5	0.0014	-0.19	0.53	-8.35	<0.0001
Shannon SP	0.7	0.69	20.4	<0.0001	0.94	0.7	28.2	<0.0001	0.15	0.43	3.56	<0.0001
Percent resistome	-0.01	0.04	-10.9	0.003	-0.05	0.03	-53	<0.0001	-0.04	0.03	-48.6	<0.0001
IS richness	0.81	0.74	13.6	<0.0001	0.77	0.8	12.9	<0.0001	-0.11	0.64	-1.66	0.0243

## Sheet: S5 Phylogenetic tree
Table S5: Species names and reference sequences used to generate 16S phylogeny.
Names	TaxID	Reference strain	Sequences_aligned_trimmed
Acetobacterium_woodii	931626	Acetobacterium_woodii_DSM_1030_16S_ribosomal_RNA,_partial_sequence	aacgggtgagtaacgcgtggtaacctaccctatggaaaggaatagccccgggaaactgggtgtaataccttataaggatgtattaaacgctcgccataggatggacccgcgtcccattagctagttggtgagataacagcccaccaaggcgacgatgggtaaccggtctgagagggcgaacggtcacactggaactgagacacggtccagactcctacgggaggcagcagtggggaatattgcgcaatgggggcaaccctgacgcagcaataccgcgtgagtgaagaaggttttcggatcgtaaagctctgttattggggaagaaagacggtacccaagaagaaagtcccggctaactacgtgccagcagccgcggtaatacgtaggggacaagcgttg…
Acholeplasma_palmae	1318466	Acholeplasma_palmae_(T);_ATCC49389;_J233;_L33734	aacgggtgagtaacacgtggtaacctgcccctaagacgaggataacagttggaaacgactgctaagactggataggaatactttaaaagactgcttagggaggggcctgcggcgcattagttagttggtgaggtaaaggcttaccaagacgatgatgcgtagccggactgagaggttgaacggccacattgggactgagacacggcccaaactcctacgggaggcagcagtagggaattttcgtcaatgggggaaaccctgaacgagcaacgccgcgtgaacgaagaagtacttcggtacgtaaagttcttttattagggaagaatgacggtacctaatgaataagccccggctaactatgtgccagcagccgcggtaatacatagggggcaagcgtta…
Achromobacter_spanius	217203	Achromobacter_spanius_strain_LMG_5911_16S_ribosomal_RNA,_partial_sequence	aacgggtgagtaatgtatcggaacgtgcctagtagcgggggataactacgcgaaagcgtagctaataccgcatacgtacgggggaaagcagcactattagagcggccgatatcggattagctagttggtggggtaacggctcaccaaggcgacgatccgtagctggtttgagaggacgaccagccacactgggactgagacacggcccagactcctacgggaggcagcagtggggaattttggacaatgggggaaaccctgatccagccatcccgcgtgtgcgatgaaggccttcgggttgtaaagcacttttggcaggaaagaatgacggtacctgcagaataagcaccggctaactacgtgccagcagccgcggtaatacgtagggtgcaagcgtta…
Acidaminococcus_intestini	568816	Acidaminococcus_intestini_RyC-MR95;_CP003058	aacgggtgagtaacgcgtggcaacctgccctccagttggggacaacattccgaaagggatgctaataccgaatgtcgagggaggaaagatgcgctggaagatgggcccgcgtctgattagctagttggtggggtaacggctcaccaaggcgatgatcagtagccggtctgagaggatgaacggccacattgggactgagacacggcccaaactcctacgggaggcagcagtggggaatcttccgcaatggacgaaagtctgacggagcaacgccgcgtgagtgatgaaggtcttcggattgtaaaactctgttgttagggacgattgacggtacctaacgaggaagccacggctaactacgtgccagcagccgcggtaatacgtaggtggcaagcgttg…
Acinetobacter_baumannii	470	Acinetobacter_baumannii_strain_DSM_30007_16S_ribosomal_RNA,_partial_sequence	gacgggtgagtaatgcttaggaatctgcctattagtgggggacaacatctcgaaagggatgctaataccgcatacgtacgggagaaagcagcgctaatagatgagcctaagtcggattagctagttggtggggtaaaggcctaccaaggcgacgatctgtagcgggtctgagaggatgatccgccacactgggactgagacacggcccagactcctacgggaggcagcagtggggaatattggacaatggggggaaccctgatccagccatgccgcgtgtgtgaagaaggccttatggttgtaaagcactttaagcgaggaggaatgacgttactcgcagaataagcaccggctaactctgtgccagcagccgcggtaatacagagggtgcgagcgtta…
Acinetobacter_baylyi	62977	Acinetobacter_baylyi_ADP1,_complete_sequence_16S	-------------------------------------------------------------------------------------------------------------------attagctagttggtggggtaaaggcctaccaaggcgacgatctgtagcgggtctgagaggatgatccgccacactgggactgagacacggcccagactcctacgggaggcagcagtggggaatattggacaatggggggaaccctgatccagccatgccgcgtgtgtgaagaaggccttatggttgtaaagcactttaagcgaggaggaatgacgttactcgcagaataagcaccggctaactctgtgccagcagccgcggtaatacagagggtgcaagcgtta…
Acinetobacter_bereziniae	106648	Acinetobacter_bereziniae_strain_ATCC_17924_16S_ribosomal_RNA,_partial_sequence	gacgggtgagtaatacttaggaatctgcctattaatgggggacaacatctcgaaagggatgctaataccgcatacgtacgggggaaagcagcgttaatagatgagcctaagtcggattagctagttggtggggtaaaggcctaccaaggcgacgatctgtagcgggtctgagaggatgatccgccacactgggactgagacacggcccagactcctacgggaggcagcagtggggaatattggacaatggggggaaccctgatccagccatgccgcgtgtgtgaagaaggccttatggttgtaaagcactttaagcgaggaggaatgacgttactcgcagaataagcaccggctaactctgtgccagcagccgcggtaatacagagggtgcgagcgtta…
Acinetobacter_chinensis	2004650	Acinetobacter_chinensis_strain_WCHAc010005_16S_ribosomal_RNA,_complete_sequence	gacgggtgagtaatgcttaggaatctgcctattagtgggggacaacattccgaaaggaatgctaataccgcatacgtacgggggaaagcagcgctaatagatgagcctaagtcggattagctagttggtggggtaaaggcctaccaaggcgacgatctgtagcgggtctgagaggatgatccgccacactgggactgagacacggcccagactcctacgggaggcagcagtggggaatattggacaatggggggaaccctgatccagccatgccgcgtgtgtgaagaaggccttttggttgtaaagcactttaagcgaggaggaatgacgttactcgcagaataagcaccggctaactctgtgccagcagccgcggtaatacagagggtgcgagcgtta…
Acinetobacter_cumulans	2136182	Acinetobacter_cumulans_strain_WCHAc060092_chromosome,_complete_genome_16S	-------------------------------------------------------------------------------------------------------------------attagctagttggtggggtaaaggcctaccaaggcgacgatctgtagcgggtctgagaggatgatccgccacactgggactgagacacggcccagactcctacgggaggcagcagtggggaatattggacaatggggggaaccctgatccagccatgccgcgtgtgtgaagaaggccttttggttgtaaagcactttaagcgaggaggaatgacgttactcgcagaataagcaccggctaactctgtgccagcagccgcggtaatacagagggtgcgagcgtta…
Acinetobacter_guillouiae	106649	Acinetobacter_guillouiae_strain_ATCC_11171_16S_ribosomal_RNA,_partial_sequence	gacgggtgagtaatacttaggaatctgcctattaatgggggacaacatctcgaaagggatgctaataccgcatacgtacgggggaaagcagcgttaatagatgagcctaagtcggattagctagttggtggggtaaaggcctaccaaggcgacgatctgtagcgggtctgagaggatgatccgccacactgggactgagacacggcccagactcctacgggaggcagcagtggggaatattggacaatggggggaaccctgatccagccatgccgcgtgtgtgaagaaggccttatggttgtaaagcactttaagcgaggaggaatgacgttactcgcagaataagcaccggctaactctgtgccagcagccgcggtaatacagagggtgcgagcgtta…
Acinetobacter_haemolyticus	29430	Acinetobacter_haemolyticus_strain_DSM_6962_16S_ribosomal_RNA,_partial_sequence	gacgggtgagtaatgcttaggaatctgcctattagtgggggacaacattccgaaaggaatgctaataccgcatacgtacgggagaaagcagcgctaatagatgagcctaagtcggattagctagttggtggggtaaaggcctaccaaggcgacgatctgtagcgggtctgagaggatgatccgccacactgggactgagacacggcccagactcctacgggaggcagcagtggggaatattggacaatgggcggaagcctgatccagccatgccgcgtgtgtgaagaaggccttttggttgtaaagcactttaagcgaggaggaatgacgttactcgcagaataagcaccggctaactctgtgccagcagccgcggtaatacagagggtgcgagcgtta…
Acinetobacter_johnsonii	40214	Acinetobacter_johnsonii_strain_Mannheim_3865/60_16S_ribosomal_RNA,_partial_sequence	gacgggtgagtaatgcttaggaatctgcctattagtgggggacaacattccgaaaggaatgctaataccgcatacgtacgggngaaagcagcgctaatagatgagcctaagtcagattagctagttggtggggtaaaggcctaccaaggcgacgatctgtagcgggtctgagaggatgatccgccacactgggactgagacacggcccagactcctacgggaggcagcagtggggaatattggacaatgggcggaagcctgatccagccatgccgcgtgtgtgaagaaggccttttggttgtaaagcactttaagcgaggaggaatgacgttactcgcagaataagcaccggctaactctgtgccagcagccgcggtaatacagagggtgcgagcgtta…
Acinetobacter_junii	40215	Acinetobacter_junii_strain_DSM_6964_16S_ribosomal_RNA,_partial_sequence	gacgggtgagtaatgcttaggaatctgcctattagtgggggacaacattccgaaaggaatgctaataccgcatacgtacgggagaaagcagcgctaatagatgagcctaagtcggattagctagttggtggggtaaaggcctaccaaggcgacgatctgtagcgggtctgagaggatgatccgccacactgggactgagacacggcccagactcctacgggaggcagcagtggggaatattggacaatggggggaaccctgatccagccatgccgcgtgtgtgaagaaggccttatggttgtaaagcactttaagcgaggaggaatgacgttactcgcagaataagcaccggctaactctgtgccagcagccgcggtaatacagagggtgcgagcgtta…
Acinetobacter_lwoffii	28090	Acinetobacter_lwoffii_strain_DSM_2403_16S_ribosomal_RNA,_partial_sequence	gacgggtgagtaatgcttaggaatctgcctattagtgggggacaacatctcgaaagggatgctaataccgcatacgtacgggagaaagcagcgctaatagatgagcctaagtcggattagctagttggtggggtaaaggcctaccaaggcgacgatctgtagcgggtctgagaggatgatccgccacactgggactgagacacggcccagactcctacgggaggcagcagtggggaatattggacaatggggggaaccctgatccagccatgccgcgtgtgtgaagaaggccttttggttgtaaagcactttaagcgaggaggaatgacgttactcgcagaataagcaccggctaactctgtgccagcagccgcggtaatacagagggtgcaagcgtta…
Acinetobacter_nosocomialis	106654	Acinetobacter_nosocomialis_strain_RUH_2376_16S_ribosomal_RNA,_partial_sequence	gacgggtgagtaatgcttaggaatctgcctattagtgggggacaacatctcgaaagggatgctaataccgcatacgtacgggagaaagcagcgctaatagatgagcctaagtcggattagctagttggtggggtaaaggcctaccaaggcgacgatctgtagcgggtctgagaggatgatccgccacactgggactgagacacggcccagactcctacgggaggcagcagtggggaatattggacaatgggcgcaagcctgatccagccatgccgcgtgtgtgaagaaggccttatggttgtaaagcactttaagcgaggaggaatgacgttactcgcagaataagcaccggctaactctgtgccagcagccgcggtaatacagagggtgcaagcgtta…
Acinetobacter_oleivorans	436717	Acinetobacter_oleivorans_DR1;_CP002080	gacgggtgagtaatgcttaggaatctgcctattagtgggggacaacatttcgaaaggaatgctaataccgcatacgtacgggagaaagcagcgctaatagatgagcctaagtcggattagctagttggtggggtaaaggcctaccaaggcgacgatctgtagcgggtctgagaggatgatccgccacactgggactgagacacggcccagactcctacgggaggcagcagtggggaatattggacaatgggcggaagcctgatccagccatgccgcgtgtgtgaagaaggccttatggttgtaaagcactttaagcgaggaggaatgacgttactcgcagaataagcaccggctaactctgtgccagcagccgcggtaatacagagggtgcaagcgtta…
Acinetobacter_pittii	48296	Acinetobacter_pittii_strain_LMG_1035_16S_ribosomal_RNA,_partial_sequence	gacgggtgagtaatgcttaggaatctgcctattagtgggggacaacatttcgaaaggaatgctaataccgcatacgtacgggagaaagcagcgctaatagatgagcctaagtcggattagctagttggtggggtaaaggcctaccaaggcgacgatctgtagcgggtctgagaggatgatccgccacactgggactgagacacggcccagactcctacgggaggcagcagtggggaatattggacaatgggcgcaagcctgatccagccatgccgcgtgtgtgaagaaggccttatggttgtaaagcactttaagcgaggaggaatgacgttactcgcagaataagcaccggctaactctgtgccagcagccgcggtaatacagagggtgcaagcgtta…
Acinetobacter_radioresistens	981334	Acinetobacter_radioresistens_(T);_DSM_6976;_X81666	gacgggtgagtaatgcttaggaatctgcctattagtgggggacaacgttccgaaaggnncgctaataccgcatacgtacgggagaaagcagcgctaatagatgagcctaagtcggattagctagttggtagggtaaaggcctaccaaggcgacgatctgtagcgggtctgagaggatgatccgccacactgggactgagacacggcccagactcctacgggaggcagcagtggggaatattggacaatggggggaaccctgatccagccatgccgcgtgtgtgaagaaggccttttggttgtaaagcactttaagcgaggaggaatgacgttactcgcagaataagcaccggctaactctgtgccagcagccgcggtaatacagagggtgcgagcgtta…
Acinetobacter_schindleri	108981	Acinetobacter_schindleri_strain_LUH5832_16S_ribosomal_RNA,_partial_sequence	gacgggtgagtaatgcttaggaatctgcctattagtgggggacaacgttccgaaaggaacgctaataccgcatacgtacgggggaaagcagcgctaatagatgagcctaagtcggattagctagttggtggggtaaaggcctaccaaggcgacgatctgtagcgggtctgagaggatgatccgccacactgggactgagacacggcccagactcctacgggaggcagcagtggggaatattggacaatgggcggaagcctgatccagccatgccgcgtgtgtgaagaaggccttttggttgtaaagcactttaagcgaggaggaatgacgttactcgcagaataagcaccggctaactctgtgccagcagccgcggtaatacagagggtgcgagcgtta…
Acinetobacter_sp.	1808001	Acinetobacter_sp._LoGeW2-3_16S_ribosomal_RNA_gene,_partial_sequence	gacgggtgagtaatgcttaggaatctgcctattagtgggggacaacgttccgaaaggaacgctaataccgcatacgtacgggagaaagcagcgctaatagatgagcctaagtcggattagctagttggtggggtaaaggcctaccaaggcgacgatctgtagcgggtctgagaggatgatccgccacactgggactgagacacggcccagactcctacgggaggcagcagtggggaatattggacaatggggggaaccctgatccagccatgccgcgtgtgtgaagaaggccttttggttgtaaagcactttaagcgaggaggaatgacgttactcgcagaataagcaccggctaactctgtgccagcagccgcggtaatacagagggtgcgagcgtta…
Acinetobacter_ursingii	108980	Acinetobacter_ursingii_strain_LUH3792_16S_ribosomal_RNA,_partial_sequence	gacgggtgagtaatacttaggaatctggctattagtgggggacaacatttcgaaagggatgctaataccgcatacgtacgggagaaagcagcgctaatagatgagcctaagtcggattagctagttggtggggtaaaggcctaccaaggcgacgatctgtagcgggtctgagaggatgatccgccacactgggactgagacacggcccagactcctacgggaggcagcagtggggaatattggacaatggggggaaccctgatccagccatgccgcgtgtgtgaagaaggccttatggttgtaaagcactttaagcgaggaggaatgacgttactcgcagaataagcaccggctaactctgtgccagcagccgcggtaatacagagggtgcgagcgtta…
Actinobacillus_pleuropneumoniae	537457	Actinobacillus_pleuropneumoniae_serovar_7_str._AP76;_CP001091	gacgggtgagtaatgcttgggaatctggcttatggagggggataactacgggaaactgtagctaataccgcgtaattatggattaaagggttgccataagatgagcccaagtgggattaggtagttggttaggtaaaggctgaccaagccgacgatctctagctggtctgagaggatgaccagccacactggaactgagacacggtccagactcctacgggaggcagcagtggggaatattgcacaatggggggaaccctgatgcagccatgccgcgtgaatgaagaaggccttcgggttgtaaagttctttcggtagcgaggaatgacgttaactacagaagaagcaccggctaactccgtgccagcagccgcggtaatacggagggtgcgagcgtta…
Actinomyces_pacaensis	1852377	Actinomyces_pacaensis_strain_P122p_-19_16S_ribosomal_RNA_gene,_partial_sequence	---------------------------------------------------------------------------------------------------------------------------------------------------------------------------------------------------------------------------------------------------------------------------------------------------------------------------------------------------------------------------------------------------------------…
Actinomyces_sp.	706439	Actinomyces_sp._oral_taxon_171_str._F0337;_GU470901	aacgggtgagtaacacgtagtaacctgcccccttcttctggataaccgcatgaaagtgtggctaatacgggatattggtgtgggaaagattcggtgggggatgggctcgcggcctatcagcttgttggtggggtgatggcctaccaaggcggtgacgggtagccggcctgagagggtggacggtcacactgggactgagacacggcccagactcctacgggaggcagcagtggggaatattgcacaatgggcgcaagcctgatgcagcgacgccgcgtgagggatggaggccttcgggttgtgaacctctttcgccagtgaagcttgacggtagctggataagaagcgccggctaactacgtgccagcagccgcggtaatacgtagggcgcgagcgttg…
Aeromonas_caviae	648	Aeromonas_caviae_strain_ATCC_15468_16S_ribosomal_RNA,_partial_sequence	gacgggtgagtaatgcctgggaaattgcccagtcgagggggataacagttggaaacgactgctaataccgcatacgtacgggggaaagcagcgcgattggatatgcccaggtgggattagctagttggtgaggtaatggctcaccaaggcgacgatccctagctggtctgagaggatgatcagccacactggaactgagacacggtccagactcctacgggaggcagcagtggggaatattgcacaatgggggaaaccctgatgcagccatgccgcgtgtgtgaagaaggccttcgggttgtaaagcactttcagcgaggaggaatgacgttactcgcagaagaagcaccggctaactccgtgccagcagccgcggtaatacggagggtgcaagcgtta…
Aeromonas_encheleia	73010	Aeromonas_encheleia_strain_A_1881_16S_ribosomal_RNA,_partial_sequence	gacgggtgagtaatgcctggggatctgcccagtcgagggggataacagttggaaacgactgctaataccgcatacgtacgggggaaaggagcgcgattggatgaacccaggtgggattagctagttggtggggtaatggctcaccaaggcgacgatccctagctggtctgagaggatgatcagccacactggaactgagacacggtccagactcctacgggaggcagcagtggggaatattgcacaatgggggaaaccctgatgcagccatgccgcgtgtgtgaagaaggccttcgggttgtaaagcactttcagcgaggaggaatgacgttactcgcagaagaagcaccggctaactccgtgccagcagccgcggtaatacggagggtgcaagcgtta…
Aeromonas_rivipollensis	948519	Aeromonas_rivipollensis_strain_P2G1_16S_ribosomal_RNA,_partial_sequence	gacgggtgagtaatgcctgggaaattgcccagtcgagggggataacagttggaaacgactgctaataccgcatacgtacgggggaaagcagcgcgattggatatgcccaggtgggattagcttgttggtgaggtaatggctcaccaaggcgacgatccctagctggtctgagaggatgatcagccacactggaactgagacacggtccagactcctacgggaggcagcagtggggaatattgcacaatgggggaaaccctgatgcagccatgccgcgtgtgtgaagaaggccttcgggttgtaaagcactttcagcgaggaggaatgacgttactcgcagaagaagcaccggctaactccgtgccagcagccgcggtaatacggagggtgcaagcgtta…
Aeromonas_sp.	1636608	Aeromonas_sp._ASNIH3_chromosome,_complete_genome_16S	gacgggtgagtaatgcctgggaaattgcccagtcgagggggataacagttggaaacgactgctaataccgcatacgtacgggggaaagcagcgcgattggatatgcccaggtgggattagctagttggtgaggtaatggctcaccaaggcgacgatccctagctggtctgagaggatgatcagccacactggaactgagacacggtccagactcctacgggaggcagcagtggggaatattgcacaatgggggaaaccctgatgcagccatgccgcgtgtgtgaagaaggccttcgggttgtaaagcactttcagcgaggaggaatgacgttactcgcagaagaagcaccggctaactccgtgccagcagccgcggtaatacggagggtgcaagcgtta…
Aggregatibacter_actinomycetemcomitans	714	Aggregatibacter_actinomycetemcomitans_strain_277/49-50(8)_16S_ribosomal_RNA,_partial_sequence	gacgggtgagtaatgcttgggnatctgtcttatggagggggataacgacgggaaactgtcgctaataccgcgtagagggagatgaaagtgttgccatagaatgagcccaagtgtgattaggtagttggtggggtaaaggcctaccaagccgacgatcgctagctggtctgagaggatggccagccacaccgggactgagacacggcccngnctcctacgggaggcagcagtggggaatattgcgcaatgggggcaaccctgacgcagccatgccgcgtgaatgaagaaggccttcgggttgtaaagttctttcggtgatgaggaatgacgttaaatacagaagaagcaccggctaactccgtgccagcagccgcggtaatacggggggtgcgagcgtta…
Aggregatibacter_aphrophilus	634176	Aggregatibacter_aphrophilus_NJ8700;_CP001607	gacgggtgagtaatgcttggggatctggcttatggagggggataacgacgggaaactgtcgctaataccgcgtagagggagatgaaagtgttgccataggatgagcccaagtgggattaggtagttggtggggtaatggcctaccaagccgacgatctctagctggtctgagaggatgaccagccacaccgggactgagacacggcccggactcctacgggaggcagcagtggggaatattgcgcaatgggggcaaccctgacgcagccatgccgcgtgaatgaagaaggccttcgggttgtaaagttctttcggtgacgaggaatgacgttaatcacagaagaagcaccggctaactccgtgccagcagccgcggtaatacggagggtgcgagcgtta…
Agrobacterium_fabrum	176299	Agrobacterium_fabrum_str._C58;_AE007869	gacgggtgagtaacgcgtgggaatctacccatctctgcggaatagctctgggaaactggaattaataccgcatacgtacgggggaaagattcggggatggatgagcccgcgttggattagctagttggtggggtaaaggcctaccaaggcgacgatccatagctggtctgagaggatgatcagccacattgggactgagacacggcccaaactcctacgggaggcagcagtggggaatattggacaatgggcgcaagcctgatccagccatgccgcgtgagtgatgaaggccttagggttgtaaagctctttcaccgatgaagaatgacggtagtcggagaagaagccccggctaacttcgtgccagcagccgcggtaatacgaagggggctagcgttg…
Agrobacterium_tumefaciens	358	Agrobacterium_tumefaciens_strain_IAM_12048_16S_ribosomal_RNA,_partial_sequence	gacgggtgagtaacgcgtgggaacataccctttcctgcggaatagctccgggaaactggaattaataccgcatacgtacgggggaaagattcggggaaggattggcccgcgttggattagctagttggtggggtaaaggcctaccaaggcgacgatccatagctggtctgagaggatgatcagccacattgggactgagacacggcccaaactcctacgggaggcagcagtggggaatattggacaatgggcgcaagcctgatccagccatgccgcgtgagtgatgaaggccttagggttgtaaagctctttcaccggagaagaatgacggtatccggagaagaagccccggctaacttcgtgccagcagccgcggtaatacgaagggggctagcgttg…
Alistipes_sp.	2585119	Alistipes_dispar_5CPEGH6_gene_for_16S_ribosomal_RNA,_partial_sequence	cacgggtgcgtaacgcgttgcaacctacccataacaggggcataacactgagaaattggtactaattccccataactcgggttgaaaactctggttatggatgggcatgcgttgtattagctggttggtgaggtaacggctcaccaaggcgacgatacatagggggactgagaggttaaccccccacattggtactgagacacggaccaaactcctacgggaggcagcagtgaggaatattggtcaatggacgcaagtctgaaccagccatgccgcgtgcaggaagacggtctatgagttgtaaactgcttttgtacgagggtactgaaagtatcgtacgaataaggatcggctaactccgtgccagcagccgcggtaatacggaggattcaagcgtta…
Alistipes_shahii	717959	Alistipes_shahii_WAL_8301_16S_ribosomal_RNA,_partial_sequence	cacgggtgcgtaacgcgttgcaacctacccataacagggggataacactgagaaattggtactaataccccataactttggttgaaaactctggttatggatgggcatgcgttgtattagctggttggtgaggtaacggctcaccaaggcaacgatacatagggggactgagaggttaaccccccacattggtactgagacacggaccaaactcctacgggaggcagcagtgaggaatattggtcaatggacgcaagtctgaaccagccatgccgcgtgcaggaagacggtctatgagttgtaaactgcttttgtacgagggtactgaaagtatcgtacgaataaggatcggctaactccgtgccagcagccgcggtaatacggaggatccaagcgtta…
Amphibacillus_xylanus	698758	Amphibacillus_xylanus_NBRC_15112_strain_DSM_6626_16S_ribosomal_RNA,_partial_sequence	gatgggtgagtaacacgtgccaacctgcctataagactgggataacttacggaaacgtgagctaataccggataaaagaggataaaagatgcacttatagatgggcccgcggcgcattagctagttggtgagataaaagctcaccaagccaacgatgcgtagccgacctgagagggtgatcggccacactgggactgagatacggcccagactcctacgggaggcagcagtagggaatcttccgcaatggacgaaagtctgacggagcaacgccgcgtgaacgaagaaggtcttcggatcgtaaagttctgttgttagggaagaatgacggtacctaacgagaaagccccggctaactacgtgccagcagccgcggtaatacgtagggggcaagcgttg…
Anaerobutyricum_hallii	39488	Anaerobutyricum_hallii_strain_CLA-AA-H202_16S_ribosomal_RNA_gene,_partial_sequence	gacgggtgagtaacgcgtggtaacctgccctgtacagggggataacagctggaaacggctgctaataccgcataagttgtgtgaaaaactctggtacaggatgggcccgcgtctgattagctggttggcagggtaacggcctaccaaggcaacgatcagtagccggtctgagaggatgaacggccacattggaactgagacacggtccaaactcctacgggaggcagcagtggggaatattgcacaatgggggaaaccctgatgcagcaacgccgcgtgagtgaagaagtatttcggtatgtaaagctctatcagcagggaagaatgacggtacctgactaagaagctccggctaaatacgtgccagcagccgcggtaatacgtatggagcaagcgtta…
Anaerococcus_mediterraneensis	1870984	Anaerococcus_mediterraneensis_strain_Marseille-P2765_16S_ribosomal_RNA,_partial_sequence	gacgggtgagtaacgcgtagtaacctgccttagagaaggggatagcctttggaaacgaagaataataccctatgaawgytggtcaaagattcgctctaagatggacttgcgtctgattagctagttggtgagataayagctcaccaaggcaacgatcagtagccggcttgagagagtgtacggccacattgggactgagacacggcccagactcctacgggaggcagcagtggggaattttgcacaatgggggaaaccctgatgcagcgacgccgcgtgattta-gaaggccttcgggttgtaaaaatcttttctatgggaagaatgacagtaccataggaataaggaccggctaattacgtgccagcagccgcggtaatacgtaaggtccgagcgttg…
Anaerostipes_hadrus	649756	Anaerostipes_hadrus_strain_DSM_3319_16S_ribosomal_RNA,_partial_sequence	gacgggtgagtaacgcgtggcaacctgccctgtacagggggataacagtcagaaatgactgctaataccgcataagcaggggtaaaaactctggtacaggatggacccgcgtctgattagctggttggtgaggtaacggctcaccaaggcgacgatcagtagccggcttgagagagtgaacggccacattgggactgagacacggcccaaactcctacgggaggcagcagtggggaatattgcacaatgggggaaaccctgatgcagcgacgccgcgtgagtgaagaagtatctcggtatgtaaagctctatcagcagggaagaatgacggtacctgactaagaagccccggctaactacgtgccagcagccgcggtaatacgtagggggcaagcgtta…
Arcobacter_cibarius	255507	Arcobacter_cibarius_strain_LMG_21996_16S_ribosomal_RNA,_partial_sequence	cacgggtgagtaatgtatggtaatatgcctcttactaagggataacaaatggaaacgtttgctaataccttatactagtaagggaaagatttggtaagagattagcctgtattgtatcagttagttggtggggtaatggcctaccaagacaatgacgcataactggtttgagaggatgatcagtcacactggaactgagacacggtccagactcctacgggaggcagcagtggggaatattgcacaatggacgaaagtctgatgcagcaacgccgcgtggaggatgacacatttcggtgcgtaaactccttttatataagaagaatgacggtattatatgaataagcaccggctaactccgtgccagcagccgcggtaatacggggggtgcaagcgtta…
Atlantibacter_hermannii	565	Atlantibacter_hermannii_strain_CIP_103176_16S_ribosomal_RNA,_partial_sequence	gacgggtgagtaatgtctggggatctgcctgatggagggggataactactggaaacggtagctaataccgcataacgcaagaccaaagaggtgccatcagatgaacccagatgggattagctagtaggtggggtaacggctcacctaggcgacgatccctagctggtctgagaggatgaccagccacactggaactgagacacggtccagactcctacgggaggcagcagtggggaatattgcacaatgggcgcaagcctgatgcagccatgccgcgtgtatgaagaaggccttcgggttgtaaagtactttcagcggggaggaatgacgttacccgcagaagaagcaccggctaactccgtgccagcagccgcggtaatacggagggtgcaagcgtta…
Avibacterium_paragallinarum	728	Avibacterium_paragallinarum_strain_NCTC_11296_16S_ribosomal_RNA,_partial_sequence	gacgggtgagtaatgcttgggaatctggcttatggagggggataaccattggaaacgatggctaataccgcatagaggaagattaaagggttgccataagatgagcccaagtgggattaggtagttggtgaggtgaaggctcaccaagcctgcgatctctagctggtctgagaggatggccagccacactgggactgagacacggcccagactcctacgggaggcagcagtggggaatattgcgcaatggggggaaccctgacgcagccatgccgcgtgaatgaagaaggccttcgggttgtaaagttctttcggtggtgaggaatgacgttagccacagaagaagcaccggctaactccgtgccagcagccgcggtaatacggagggtgcgagcgtta…
Bacillus_altitudinis	293387	Bacillus_altitudinis_strain_P-10_chromosome,_complete_genome_16S	gacgggtgagtaacacgtggtaacctgcctgtaagactgggataactccgggaaaccggagctaataccggatagtcaaggataaaagacgcacttacagatggacccgcggcgcattagctagttggtgaggtaacggctcaccaaggcgacgatgcgtagccgacctgagagggtgatcggccacactgggactgagacacggcccagactcctacgggaggcagcagtagggaatcttccgcaatggacgaaagtctgacggagcaacgccgcgtgagtgatgaaggttttcggatcgtaaagctctgttgttagggaagagtgacggtacctaaccagaaagccacggctaactacgtgccagcagccgcggtaatacgtaggtggcaagcgttg…
Bacillus_cereus	1396	Bacillus_cereus_strain_NBRC_15305_16S_ribosomal_RNA,_partial_sequence	gacgggtgagtaacacgtggtaacctgcccataagactgggataactccgggaaaccggggctaataccggataaccgaaattgaaaggcgcacttatggatggacccgcgtcgcattagctagttggtgaggtaacggctcaccaaggcaacgatgcgtagccgacctgagagggtgatcggccacactgggactgagacacggcccagactcctacgggaggcagcagtagggaatcttccgcaatggacgaaagtctgacggagcaacgccgcgtgagtgatgaaggctttcgggtcgtaaaactctgttgttagggaagaatgacggtacctaaccagaaagccacggctaactacgtgccagcagccgcggtaatacgtaggtggcaagcgtta…
Bacillus_ciccensis	1670641	Bacillus_ciccensis_strain_5L6_16S_ribosomal_RNA,_partial_sequence	gacgggtgagtaacacgtggcaacctgcctgtaagactgggataacttcgggaaaccggagctaataccggataataaaagctgaaagatgcacttacagatgggcccgcggcgcattagctagttggtgaggtaacggcttaccaaggcgacgatgcgtagccgacctgagagggtgatcggccacactgggactgagacacggcccagactcctacgggaggcagcagtagggaatcttccgcaatggacgaaagtctgacggagcaacgccgcgtgagtgatgaaggttttcggatcgtaaaactctgttgttagggaagaatgacggtacctaaccagaaagccacggctaactacgtgccagcagccgcggtaatacgtaggtggcaagcgttg…
Bacillus_kochii	859143	Bacillus_kochii_strain_WCC_4582_16S_ribosomal_RNA,_partial_sequence	gacgggtgagtaacacgtggcaacctgcctgtaagactgggataactccgggaaaccggggctaataccggataayttagattgaaagatgcacttacagatgggcccgcggcgcattagctagttggtgaggtaacggctcaccaaggcgacgatgcgtagccgacctgagagggtgatcggccacactgggactgagacacggcccagactcctacgggaggcagcagtagggaatcttccgcaatggacgaaagtctgacggagcaacgccgcgtgagtgatgaaggttttcggatcgtaaaactctgttgttagggaagagtgacggtacctaaccagaaagccacggctaactacgtgccagcagccgcggtaatacgtaggtggcaagcgttg…
Bacillus_luti	2026191	Bacillus_luti_strain_MCCC_1A00359_16S_ribosomal_RNA,_partial_sequence	gacgggtgagtaacacgtggtaacctgcccataagactgggataactccgggaaaccggggctaataccggataaccgaaattgaaaggcgcacttatggatggacccgcgtcgcattagctagttggtgaggtaacggctcaccaaggcaacgatgcgtagccgacctgagagggtgatcggccacactgggactgagacacggcccagactcctacgggaggcagcagtagggaatcttccgcaatggacgaaagtctgacggagcaacgccgcgtgagtgatgaaggctttcgggtcgtaaaactctgttgttagggaagaatgacggtacctaaccagaaagccacggctaactacgtgccagcagccgcggtaatacgtaggtggcaagcgtta…
Bacillus_oceanisediminis	1196031	Bacillus_oceanisediminis_strain_H2_16S_ribosomal_RNA,_partial_sequence	gacgggtgagtaacacgtggcaacctgcctgtaagactgggataacttcgggaaaccggagctaataccggataatgaaagctgaaagatgcacttacagatgggcccgcggcgcattagctagttggtgaggtaacggctcaccaaggcaacgatgcgtagccgacctgagagggtgatcggccacactgggactgagacacggcccagactcctacgggaggcagcagtagggaatcttccgcaatggacgaaagtctgacggagcaacgccgcgtgagtgatgaaggttttcggatcgtaaaactctgttgttagggaagagtgacggtacctaaccagaaagccacggctaactacgtgccagcagccgcggtaatacgtaggtggcaagcgttg…
Bacillus_pumilus	315750	Bacillus_pumilus_SAFR-032;_AY167879	gacgggtgagtaacacgtggtaacctgcctgtaagactgggataactccgggaaaccggagctaataccggatagtcaaggatgaaagacgcacttacagatggacccgcggcgcattagctagttggtggggtaatggctcaccaaggcgacgatgcgtagccgacctgagagggtgatcggccacactgggactgagacacggcccagactcctacgggaggcagcagtagggaatcttccgcaatggacgaaagtctgacggagcaacgccgcgtgagtgatgaaggttttcggatcgtaaagctctgttgttagggaagagtgacggtacctaaccagaaagccacggctaactacgtgccagcagccgcggtaatacgtaggtggcaagcgttg…
Bacillus_safensis	1178541	Bacillus_safensis_FO-36b_16S_ribosomal_RNA,_partial_sequence	gacgggtgagtaacacgtggtaacctgcctgtaagactgggataactccgggaaaccggagctaataccggatagtcaaggatgaaagacgcacttacagatggacccgcggcgcattagctagttggtggggtaatggctcaccaaggcgacgatgcgtagccgacctgagagggtgatcggccacactgggactgagacacggcccagactcctacgggaggcagcagtagggaatcttccgcaatggacgaaagtctgacggagcaacgccgcgtgagtgatgaaggttttcggatcgtaaagctctgttgttagggaagagtgacggtacctaaccagaaagccacggctaactacgtgccagcagccgcggtaatacgtaggtggcaagcgttg…
Bacillus_sp.	1581038	Bacillus_sp._FJAT-22090;_KM978199	gacgggtgagtaacacgtggcaacctgccctgtagattgggataactccgggaaaccggggctaataccgaataatgaatgttaaaagacgcactaccggatgggcccgcggcgcattaactagttggtgaggtaacggctcaccaaggggaccatgcgtaacccacctgagagggtgatcggccacactgggactgaaacacggcccaaactcctacgggaggcagcagtagggaatcttccacaatggacgaaagtctgatggaacaacgccccgtgagtgaagaaggttttcggatcgtaaaactctgttgtgagggaagagtgacggtacctcattaaaaagccacggctaactacgtgccagcagccgcggtaatacgtaggtggcaagcgttg…
Bacillus_thermoamylovorans	35841	Bacillus_thermoamylovorans_strain_DKP_16S_ribosomal_RNA,_partial_sequence	gacgggtgagtaacacgtggtaacctgcctgtaagaccgggataactccgggaaaccggtgctaataccggatagaagataaggaaagatgcacttacagatgggcccgcggcgcattagctagttggtgaggtaatggctcaccaaggcgacgatgcgtagccgacctgagagggtgatcggccacactgggactgagacacggcccagactcctacgggaggcagcagtagggaatcttccgcaatggacgaaagtctgacggagcaacgccgcgtgagcgaagaaggtcttcggatcgtaaagctctgttgttagggaagagggacggtacctgacgagaaagccacggctaactacgtgccagcagccgcggtaatacgtagggtgcaagcgttg…
Bacillus_thuringiensis	527019	Bacillus_thuringiensis_IBL_200;_CM000758	gacgggtgagtaacacgtggtaacctgcccataagactgggataactccgggaaaccggggctaataccggataaccgaaattgaaaggcgcacttatggatggacccgcgtcgcattagctagttggtgaggtaacggctcaccaaggcaacgatgcgtagccgacctgagagggtgatcggccacactgggactgagacacggcccagactcctacgggaggcagcagtagggaatcttccgcaatggacgaaagtctgacggagcaacgccgcgtgagtgatgaaggctttcgggtcgtaaaactctgttgttagggaagaatgacggtacctaaccagaaagccacggctaactacgtgccagcagccgcggtaatacgtaggtggcaagcgtta…
Bacillus_wiedmannii	1890302	Bacillus_wiedmannii_strain_FSL_W8-0169_16S_ribosomal_RNA,_partial_sequence	gacgggtgagtaacacgtggtaacctgcccataagactgggataactccgggaaaccggggctaataccggataaccgaaattgaaaggcgcacttatggatggacccgcgtcgcattagctagttggtgaggtaacggctcaccaaggcaacgatgcgtagccgacctgagagggtgatcggccacactgggactgagacacggcccagactcctacgggaggcagcagtagggaatcttccgcaatggacgaaagtctgacggagcaacgccgcgtgagtgatgaaggctttcgggtcgtaaaactctgttgttagggaagaatgacggtacctaaccagaaagccacggctaactacgtgccagcagccgcggtaatacgtaggtggcaagcgtta…
Bacteroides_caecimuris	1796613	Bacteroides_caecimuris_strain_I48_16S_ribosomal_RNA,_partial_sequence	cacgggtgagtaacacgttccaacctgccgataactcggggatagcctttcgaaagaaagattaatatccgataggttgatattaaagaatcggttatcgatggggatgcgttccattagttagttggcggggtaacggcccaccaagacgacgatggataggggttctgagaggaaggtcccccacattggaactgagacacggtccaaactcctacgggaggcagcagtgaggaatattggtcaatggacgagagtctgaaccagccaagtagcgtgaaggatgactgcctatgggttgtaaacttcttttatatgggaatattgtatgtaccatatgaataaggatcggctaactccgtgccagcagccgcggtaatacggaggatccgagcgtta…
Bacteroides_cellulosilyticus	246787	Bacteroides_cellulosilyticus_strain_JCM_15632_16S_ribosomal_RNA,_partial_sequence	cacgggtgagtaacacgttccaacctaccggttattccgggatagcctttcgaaagaaagattaataccggatagtttgttattaaagaatcgataaccgatggggatgcgttccattagtttgttggcggggtaacggcccaccaagacatcgatggataggggttctgagaggaaggtcccccacattggaactgagacacggtccaaactcctacgggaggcagcagtgaggaatattggtcaatggacgagagtctgaaccagccaagtagcgtgaaggatgactgcctatgggttgtaaacttcttttatatgggaatattgtatgtaccatacgaataaggatcggctaactccgtgccagcagccgcggtaatacggaggatccgagcgtta…
Bacteroides_dorei	997877	Bacteroides_dorei;_HS1_L_3_B_079;_CP008741	cacgggtgagtaacacgttccaacctgccctttactcggggatagcctttcgaaagaaagattaatacccgatagctcattattaaaggatcggtaaaggatggggatgcgttccattaggttgttggtgaggtaacggctcaccaagccttcgatggataggggttctgagaggaaggtcccccacattggaactgagacacggtccaaactcctacgggaggcagcagtgaggaatattggtcaatgggcgttagcctgaaccagccaagtagcgtgaaggatgaaggtctatgggtcgtaaacttcttttatataagaatattgtatgtattatatgaataaggatcggctaactccgtgccagcagccgcggtaatacggaggatccgagcgtta…
Bacteroides_fragilis	817	Bacteroides_fragilis_strain_DSM_2151_16S_ribosomal_RNA,_partial_sequence	cacgggtgagtaacacgttccaacctgccctttactcggggatagcctttcgaaagaaagattaatacccgatagctcattattaaaggatcggtaaaggatggggatgcgttccattaggttgttggtgaggtaacggctcaccaagccttcgatggataggggttctgagaggaaggtcccccacattggaactgagacacggtccaaactcctacgggaggcagcagtgaggaatattggtcaatgggcgctagcctgaaccagccaagtagcgtgaaggatgaaggtctatggggcgtaaacttcttttatataagaatattgtatgtattatatgaataaggatcggctaactccgtgcca--caccgcggtaatacggaagatccgagcgtta…
Bacteroides_heparinolyticus	28113	Bacteroides_heparinolyticus_strain_HEP_16S_ribosomal_RNA,_partial_sequence	cacgggtgagtaacacgttccaaccttccggtaactccggtatagcctttcgaaagaaagattaatcccggatagttctccattaaaggatcggntaccgatggggatgcgttccattaggcagttggcggggtaacggcccaccaaacctaggatggataggggttctgagaggaaggtcccccacattggaactgagacacggtccnaactcctacgggaggcagcagtgaggaatattggtcaatgggcggaagcctgaaccagccaagtagcgtgaaggatgactgcctatnggttgtaaacttcttttataagggaatattgcatgtaccttatgaataaggatcggctaactccgtgccagcagccgcggtnatacggaggatccgagcgtta…
Bacteroides_uniformis	820	Bacteroides_uniformis_strain_JCM_5828_16S_ribosomal_RNA,_partial_sequence	cacgggtgagtaacacgttccaacctgccgatgactcggggatagcctttcgaaagaaagattaatacccgatggcgaactattaaagaatcggtcatcgatggggatgcgttccattaggttgttggcggggtaacggcccaccaagccttcgatggataggggttctgagaggaaggtcccccacattggaactgagacacggtccaaactcctacgggaggcagcagtgaggaatattggtcaatggacgagagtctgaaccagccaagtagcgtgaaggatgactgcctatgggttgtaaacttcttttatacgggaatattgtatgtaccgtatgaataaggatcggctaactccgtgccagcagccgcggtaatacggaggatccgagcgtta…
Bacteroides_vulgatus	821	Bacteroides_vulgatus_strain_JCM_5826_16S_ribosomal_RNA,_partial_sequence	cacgggtgagtaacacgttccaacctgccgtctactcttggacagccttctgaaaggaagattaatacaagatggcacatgattaaaggtacggtagacgatggggatgcgttccattagatagtaggcggggtaacggcccacctagtcttcgatggataggggttctgagaggaaggtcccccacattggaactgagacacggtccaaactcctacgggaggcagcagtgaggaatattggtcaatgggcgagagcctgaaccagccaagtagcgtgaaggatgactgcctatgggttgtaaacttcttttataaaggaatattgcatgtactttatgaataaagatcggctaactccgtgccagcagccgcggtaatacggaggatccgagcgtta…
Bifidobacterium_longum	205913	Bifidobacterium_longum_subsp._null_DJO10A;_CP000605	aacgggtgagtaatgcgtaccgacctgccccatacaccggaatagctcctggaaacgggtggtaatgccggatgctcttctgggaaagcttcggtatgggatggggtcgcgtcctatcagcttgacggcggggtaacggcccaccgtggcttcgacgggtagccggcctgagagggcgaccggccacattgggactgagatacggcccagactcctacgggaggcagcagtggggaatattgcacaatgggcgcaagcctgatgcagcgacgccgcgtgagggatggaggccttcgggttgtaaacctcttttatcggggagcagtgagtttacccgttgaataagcaccggctaactacgtgccagcagccgcggtaatacgtagggtgcaagcgtta…
Blautia_sp.	1912897	Blautia_argi_strain_KCTC_15426_16S_ribosomal_RNA,_complete_sequence	gacgggtgagtaacgcgtggtaacctgcctcatacaggggaataacagttagaaatggctgctaatgccgcataagtggtgtgaaaaactctggtatgagatggacccgcgtctgattaggtagttggcggggtaacggcccaccaagccgacgatcagtagccgacctgagagggtgaccggccacattgggactgagacacggcccagactcctacgggaggcagcagtggggaatattgcacaatggaggaaactctgatgcagcgacgccgcgtgaaggaagaagtatctcggtatgtaaacttctatcagcagggaagaatgacggtacctgactaagaagccccggctaactacgtgccagcagccgcggtaatacgta-ggggcaagcgtta…
Brachybacterium_sp.	1903186	Brachybacterium_sp._P6-10-X1_chromosome,_complete_genome_16S	---------------------------------------------------------------------------------------------------------------------------gttggtgaggtaatggctcaccaaggcgatgacgggtagccggcctgagagggcgaccggccacactgggactgagacacggcccagactcctacgggaggcagcagtggggaatattgcacaatgggcgaaagcctgatgcagcgacgccgcgtgagggatgacggccttcgggttgtaaacctctttcagtagggaagagtgacggtacctgcagaagaagcgccggctaactacgtgccagcagccgcggtaatacgtagggcgcaagcgttg…
Brevibacillus_brevis	1393	Brevibacillus_brevis_strain_NBRC_15304_16S_ribosomal_RNA,_partial_sequence	gacgggtgagtaacacgtggcaacctgcctctcagactgggataacatagggaaacttatgctaataccggataggcgaaaagaaaaggcgcactgggagatgggcctgcggcgcattagctagttggtggggtaacggcctaccaaggcgacgatgcgtagccgacctgagagggtgaccggccacactgggactgagacacggcccagactcctacgggaggcagcagtagggaattttccacaatggacgaaagtctgatggagcaacgccgcgtgaacgatgaaggtcttcggattgtaaagttctgttgttagggacgaatgacggtacctgacgagaaagccacggctaactacgtgccagcagccgcggtaatacgtaggtggcaagcgttg…
Brevibacillus_laterosporus	1465	Brevibacillus_laterosporus_strain_IAM_12465_16S_ribosomal_RNA,_partial_sequence	gacgggtgagtaacacgtggcaacctgcctgtaagactgggataacatagggaaacttatgctaataccggataggcgaaacggaaagatgcacttacagatgggcctgcggcgcattagctagttggtgaggtaanggctcaccaaggcgacgatgcgtagccgacctgagagggtgaccggccacactgggactgagacacggcccagactcctacgggaggcagcagtagggaattttccacaatggacgaaagtctgatggagcaacgccgcgtgaacgatgaaggctttcgggtcgtaaagttctgttgttagggaagaatgacggtacctaaccagaaagccacggctaactacgtgccagcagccgcggtaatacgtaggtggcaagcgttg…
Brevundimonas_sp.	2561924	Brevundimonas_sp._MF30-B_chromosome,_complete_genome_16S	-------------------------------------------------------------------------------------------------------------------attagctagttggtgaggtaacggctcaccaaggcgacgatcagtagctggtctgagaggatggccagccacattgggactgagacacggcccaaactcctacgggaggcagcagtggggaatcttgcgcaatgggcgaaagcctgacgcagccatgccgcgtgaatgatgaaggtcttaggattgtaaaattctttcaccggggacgaatgacggtacccggagaagaagccccggctaacttcgtgccagcagccgcggtaatacgaagggggctagcgttg…
Burkholderia_lata	482957	Burkholderia_lata_strain_383_16S_ribosomal_RNA,_partial_sequence	aacgggtgagtaatacatcggaacatgtcctgtagtgggggatagcccggcgaaagccggattaataccgcatacgtacggatgaaagcggcgctatagggttggccgatggctgattagctagttggtggggtaaaggcctaccaaggcgacgatcagtagctggtctgagaggacgaccagccacactgggactgagacacggcccagactcctacgggaggcagcagtggggaattttggacaatgggcgaaagcctgatccagcaatgccgcgtgtgtgaagaaggccttcgggttgtaaagcacttttgtccggaaagaatgacggtaccggaagaataagcaccggctaactacgtgccagcagccgcggtaatacgtagggtgcgagcgtta…
Buttiauxella_sp.	2479367	Buttiauxella_sp._3AFRM03_chromosome,_complete_genome_16S	-------------------------------------------------------------------------------------------------------------------attagctagtaggtgaggtaatggctcacctaggcgacgatccctagctggtctgagaggatgaccagccacactggaactgagacacggtccagactcctacgggaggcagcagtggggaatattgcacaatgggcgcaagcctgatgcagccatgccgcgtgtatgaagaaggccttcgggttgtaaagtactttcagcgaggaggaatgacgttactcgcagaagaagcaccggctaactccgtgccagcagccgcggtaatacggagggtgcaagcgtta…
Caminibacter_mediatlanticus	391592	Caminibacter_mediatlanticus_TB-2_16S_ribosomal_RNA,_partial_sequence	gacgggtgcgtaacacgtagctacttgccctacagtgggggataacccggggaaacccgggctaataccgcatacagagaggggaaaggcccgctgtaggatagggctgcggcgtatcagctagttggtggggtaacggcctaccaaggctatgacgcgtagctggtctgagaggatgatcagccacactggaactgagacacggtccagactcctacgggaggcagcagtggggaatcttgggcaatgggcgaaagcctgacccagcaacgccgcgtggaggaagaagcccttcggggtgtaaactccttttgcaggggaaga--gacggtaccctgcgaataagctccggctaactccgtgccagcagccgcggtaatacggggggagcgagcgtta…
Campylobacter_jejuni	197	Campylobacter_jejuni_strain_NCTC_11351_16S_ribosomal_RNA,_partial_sequence	cacgggtgagtaaggtatgttaatctgccctacacaagaggacaacagttggaaacgactgctaatactctatactgagtagggaaagtttcggtgtaggatgagactatatagtatcagctagttggtaaggtaatggcttaccaaggctatgacgcttaactggtctgagaggatgatcagtcacactggaactgagacacggtccagactcctacgggaggcagcagtagggaatattgcgcaatgggggaaaccctgacgcagcaacgccgcgtggaggatgacacttttcggagcgtaaactccttttcttagggaaga--gacggtacctaaggaataagcaccggctaactccgtgccagcagccgcggtaatacggagggtgcaagcgtta…
Capnocytophaga_gingivalis	1017	Capnocytophaga_endodontalis_strain_ChDC_OS43,_complete_genome_16S	cacgggtgcgtaacgcgttacaatctgccttttatccggggatagcccgaagaaatttggattaataccctatggtcacttattaaagctacggtaaaagatgagtatgcgttctattagctagttggagaggtaacggctccccaaggcgacgatagataggggttctgagagggatgtcccccacactggtactgagatacggaccagactcctacgggaggcagcagtgaggaatattggacaatggtcggaagactgatccagccatgccgcgtgcaggatgacggcttatgggttgtaaactgcttttgtaagggaagaatgacggtaccttacgaataagcatcggctaactccgtgccagcagccgcggtaatacggaggatgcgagcgtta…
Capnocytophaga_leadbetteri	327575	Capnocytophaga_gingivalis_strain_ATCC_33624_16S_ribosomal_RNA,_partial_sequence	cacgggtgcgtaacgcgttgcaacctacctttcacagggggatagcccgaagaaatttggattaataccccataattgataattaaaactgtggtgaaagatgggcatgcgtcctattagctagttggagtggtaacggcaccccaaggctacgataggtaggggtcctgagagggagatcccccacactggtactgagacagggaccagactcctacgggaggcagcagtgaggaatattggtcaatggtcggaagactgaaccagccatgccgcgtgcaggaagaatgcttatgggttgtaaactgcttttatatgggaagaatgacggtaccatatgaataagcatcggctaactccgtgccagcagccgcggtaatacggaggatgcgagcgtta…
Capnocytophaga_sp.	209053	Capnocytophaga_leadbetteri_strain_AHN8855_16S_ribosomal_RNA,_partial_sequence	tacgggtgcgtaacgcgttacaatctgcctttcacatagggatagcccgaagaaatttggattaatacctaatagttttatattaaagctgcggtgaaagatgagtatgcgttctattagctagttggagaggtaacggctccccaaggctacgatagataggggttctgagagggatatcccccacactggtactgagatacggaccagactcctacgggaggcagcagtgaggaatattggacaatggtcggaagactgatccagccatgccgcgtgcaggaagacggcttatgggttgtaaactgcttttgcaggggaagaatgacggtactctgcgaataagcatcggctaactccgtgccagcagccgcggtaatacggaggatgcgagcgtta…
Capnocytophaga_sputigena	1019	Capnocytophaga_sputigena_strain_JCM_12967_16S_ribosomal_RNA,_partial_sequence	cacgggtgcgtaacgcgttacaatctgcctttcacatagggatagcccgaagaaatttggattaatacctaatggttttatattaaagctatggtgaaagatgagtatgcgttctattagctagttggagaggtaacggctccccaaggcgacgatagataggggttctgagagggatgtcccccacactggtactgagatacggaccagactcctacgggaggcagcagtgaggaatattggacaatggtcggaagactgatccagccatgccgcgtgcaggatgaaggcctatggattgtaaactgcttttgtaagggaagaatgacggtaccttacgaataagcatcggctaactccgtgccagcagccgcggtaatacggaggatgcgagcgtta…
Cardiobacterium_hominis	2718	Cardiobacterium_hominis_strain_6573_16S_ribosomal_RNA,_partial_sequence	aacgggtgagtaacgcatgggaatctgccttttgctgggggataacgtagggaaacttacgctaataccgcataactaagggtgaaagcggcggcaagagatgagcccatgttggattagctagttggtggggtaaaggcctaccaaggcgacgatccatagctggtctgagaggatgatcagccacactgggactgagacacggcccagactccnacgggaggcagcagtggggaatattggacnatggggggaaccctgatccagcaatgccgcgtgtgtgaagaaggccttcgggttgtaaagcactttcagtagggaggaatgacgttacctacagaagaagcaccggctaactccgtgccagcagccgcggtaatacggagggtgcgagcgtta…
Carnobacterium_divergens	2748	Carnobacterium_divergens_strain_DSM_20623_16S_ribosomal_RNA,_partial_sequence	gacgggtgagtaacacgtggtaacctgcccataagagggggataacattcggaaacggatgctaataccgcatattgcttgatgaaaggtgcncttatggatggacccncggtgcattagttagttggtgaggtaatggctcaccaagaccatgatgcatagccgacctgagagggtgatcggccacactgggactgagacacggccnngactcctacgggaggcagcagtagggaatcttccgcaatggacgaaagtctgacggagcaatgccgcgtgagtgaagaaggttttcggatcgtaaaactctgttgttagagaagagtgacggtatctaaccagaaagccacggctaactacgtgccagcagccncggtaatacgtaggtggcnagcgttg…
Carnobacterium_inhibens	1266845	Carnobacterium_inhibens_subsp._gilichinskyi_strain_WN1359_16S_ribosomal_RNA_gene,_partial_sequence	gacgggtgagtaacacgtggtaacctgcccataagagggggataacatccggaaacggatgctaataccgcatattgatggaaaaaaggtgcgcttatggatggacccgcggcgtattagctagttggtgaggtaatggctcaccaaggcgatgatacgtagccgacctgagagggtgatcggccacactgggactgagacacggcccagactcctacgggaggcagcagtagggaatcttccgcaatggacgaaagtctgacggagcaatgccgcgtgagtgaagaaggttttcggatcgtaaaactctgttgttagagaagagtgacggtatctagggagaaagccacggctaactacgtgccagcagccgcggtaatacgtaggtggcaagcgttg…
Chryseobacterium_sp.	2497456	Chryseobacterium_aureum_16S_ribosomal_RNA_gene,_partial_sequence	---------------------------------------------------gaaaggaagattaataccccataatcgatattgaaaactctggatagagatgggcacgcgcaagattagatagttggtagggtaacggcctaccaagtcagtgatctttagggggcctgagagggtgatcccccacactggtactgagacacggaccagactcctacgggaggcagcagtgaggaatattggacaatgggtgagagcctgatccagccatcccgcgtgaaggacgacggcctatgggttgtaaacttcttttgtatagggatactgaaggtactatacgaataagcaccggctaactccgtgccagcagccgcggtaatacggagggtgcaagcgtta…
Chryseobacterium_balustinum	246	Chryseobacterium_balustinum_16S_ribosomal_RNA,_partial_sequence	tacgggtgcggaacacgttgcaacctgcctttatcagggggatagcctttcgaaaggaagattaataccccataattgatattgaaaactctggatagagatgggcacgcgcaagattagatagttggtgaggtaacggctcaccaagtcgatgatctttagggggcctgagagggtgatcccccacactggtactgagacacggaccagactcctacgggaggcagcagtgaggaatattggacaatgggttagcgcctgatccagccatcccgcgtgaaggacgacggcctatgggttgtaaacttcttttgtacagggatactgaaggtactgtacgaataagcaccggctaactccgtgccagcagccgcggtaatacggagggtgcaagcgtta…
Chryseobacterium_camelliae	1265445	Chryseobacterium_camelliae_strain_THG_C4-1_16S_ribosomal_RNA,_partial_sequence	cacgggtgcggaacacgttgcaacctgcctttatcagggggatagcctttcgaaaggaagattaataccccataattgatattgaaaactatggataaagatgggcacgcgcaggattagatagttggtagggtaacggcctaccaagtcaacgatccttagggggcctgagagggtgatcccccacactggtactgagacacggaccagactcctacgggaggcagcagtgaggaatattggacaatgggtgagagcctgatccagccatcccgcgtgaaggacgacggcctatgggttgtaaacttcttttgtatagggatactgaaggtactatacgaataagcaccggctaactccgtgccagcagccgcggtaatacggagggtgcaagcgtta…
Chryseobacterium_carnipullorum	1124835	Chryseobacterium_carnipullorum_strain_9_R23581_16S_ribosomal_RNA,_partial_sequence	tacgggtgcggaacacgttgcaacctgcctttatctgggggatagcctttcgaaaggaagattaataccccataatttttattgaaaactctggatagagatgggcacgcgcaagattagatagttggtgaggtaacggctcaccaagtcgacgatctttagggggcctgagagggtgatcccccacactggtactgagacacggaccagactcctacgggaggcagcagtgaggaatattggacaatgggtgaaagcctgatccagccatcccgcgtgaaggacgacggcctatgggttgtaaacttcttttgtatagggatactgaaggtactatacgaataagcaccggctaactccgtgccagcagccgcggtaatacggagggtgcaagcgtta…
Chryseobacterium_gallinarum	1324352	Chryseobacterium_gallinarum_strain_100_16S_ribosomal_RNA,_partial_sequence	tacgggtgcggaacacgttgcaacctgcctttatcagggggatagcctttcgaaaggaagattaataccccataattaatattgaaaactctggatagagatgggcacgcgcaagattagatagttggtgaggtaacggctcaccaagtctncgatctttagggggcctgagagggtgatcccccacactggtactgagacacggaccagactcctacgggaggcagcagtgaggaatattggacaatgggtgcgagcctgatccagccatcccgcgtgaaggacgacggcctatgggttgtaaacttcttttgtatagggatactgaaggtactatacgaataagcaccggctaactccgtgccagcagccgcggtaatacggagggtgcaagcgtta…
Chryseobacterium_gleum	250	Chryseobacterium_gleum_strain_NBRC_15054_16S_ribosomal_RNA,_partial_sequence	---------------------------------------------------------------------------------------------------gatgggcacgcgcaagattagatagttggtgaggtaacggctcaccaagtctgcgatctttagggggcctgagagggtgatcccccacactggtactgagacacggaccagactcctacgggaggcagcagtgaggaatattggacaatgggtgagagcctgatccagccatcccgcgtgaaggacgacggcctatgggttgtaaacttcttttgtatagggatactgaaggtactatacgaataagcaccggctaactccgtgccagcagccgcggtaatacggagggtgcaagcgtta…
Chryseobacterium_indologenes	253	Chryseobacterium_indologenes_strain_DSM_16777_genome_assembly,_contig:_Ga0111687_112,_whole_genome_shotgun_sequence_16S	tacgggtgcggaacacgttgcaacctgcctttatcagggggatagcctttcgaaaggaagattaataccccataattattattgaaaactctggatagagatgggcacgcgcaagattagatagttggtagggtaacggcctaccaagtcagtgatctttagggggcctgagagggtgatcccccacactggtactgagacacggaccagactcctacgggaggcagcagtgaggaatattggacaatgggtgagagcctgatccagccatcccgcgtgaaggacgacggcctatgggttgtaaacttcttttgtatagggatactgaaggtactatacgaataagcaccggctaactccgtgccagcagccgcggtaatacggagggtgcaagcgtta…
Chryseobacterium_indoltheticum	254	Chryseobacterium_indoltheticum_strain_LMG_4025_16S_ribosomal_RNA,_partial_sequence	tacgggtgcgtaacacgttgcaacctacctttatcaggggaatagcctttcgaaaggaagattaatactccataattaatattgaaaactctggataaagatgggcacgcgcaagattagatagttggtgaggtaacggctcaccaagtcaatgatctttaggggtcctgagagggagatcccccacactggtactgagacacggaccagactcctacgggaggcagcagtgaggaatattggacaatgggtgagagcctgatccagccatcccgcgtgaaggatgacggcctatggattgtaaacttcttttgtataggaatactgaaggtactatacgaataagcaccggctaactccgtgccagcagccgcggtaatacggagggtgcaagcgtta…
Chryseobacterium_jeonii	266749	Chryseobacterium_jeonii_strain_AT1047_16S_ribosomal_RNA,_partial_sequence	tacgggtgcggaacacgttgcaacctgcctttatcaggaggatagcctttcgaaaggaagattaatactccataattgatattgaaaactctggatagagatgggcacgcgcaagattagatagttggtgaggtaacggctcaccaagtctatgatctttagggggcctgagagggtgatcccccacactggtactgagacacggaccagactcatacgggaggcagcagtgaggaatattggacaatgggtgagagcctgatccagccatcccgcgtgaaggacgacggcctatgggttgtaaacttcttttgtatagggatactgaaggtactatacgaataagcaccggctaactccgtgccagcagccgcggtaatacggagggtgcaagcgtta…
Chryseobacterium_piperi	558152	Chryseobacterium_piperi_strain_CTM_16S_ribosomal_RNA,_partial_sequence	tacgggtgcggaacacgttgcaacctgcctttatcagggggatagcctttcgaaaggaagattaataccccataattgaaattgaaaactgtggataaagatgggcacgcgcaagattagatagttggtgaggtaacggctcaccaagtcgatgatctttagggggcctgagagggtgatcccccacactggtactgagacacggaccagactcctacgggaggcagcagtgaggaatattggacaatgggttagcgcctgatccagccatcccgcgtgaaggacgacggcctatgggttgtaaacttcttttgtacagggatactgaaggtactgtacgaataagcaccggctaactccgtgccagcagccgcggtaatacggagggtgcaagcgtta…
Chryseobacterium_shandongense	1493872	Chryseobacterium_shandongense_strain_YF-3_16S_ribosomal_RNA,_partial_sequence	tacgggtgcggaacacgttgcaacctgcctttatcagggggatagcctttcgaaaggaagattaataccccataatagaaattgaaaactctggatagagatgggcacgcgcaagattagatagttggtgaggtaacggctcaccaagtctacgatctttagggggcctgagagggtgatcccccacactggtactgagacacggaccagactcctacgggaggcagcagtgaggaatattggacaatgggtgcgagcctgatccagccatcccgcgtgaaggatgacggcctatgggttgtaaacttcttttgtacagggatactgaaggtactgtacgaataagcaccggctaactccgtgccagcagccgcggtaatacggagggtgcaagcgtta…
Chryseobacterium_taklimakanense	536441	Chryseobacterium_taklimakanense_strain_X-65_16S_ribosomal_RNA,_partial_sequence	tacgggtgcggaacacgttgcaacctgcctttatctgggagatagccctccgaaagggggattaatattccataattgatattgaaagctccggatagagatgggcacgcgcaagattagatagttggtgaggtaacggctcaccaagtctgcgatctttagggggcctgagagggtgatcccccacactggtactgagacacggaccagactcctacgggaggcagcagtgaggaatattggacaatgggtgcaagcctgatccagccatcccgcgtgaaggattaaggcctatggattgtaaacttcttttatacagggatactgaaggtactgtatgaataagcaccggctaactccgtgccagcagccgcggtaatacggagggtgcaagcgtta…
Citrobacter_braakii	57706	Citrobacter_braakii_strain_167_16S_ribosomal_RNA,_partial_sequence	gacgggtgagtaatgtctgggaaactgcccgatggagggggataactactggaaacggtagctaataccgcataacgcaagaccaaagaggtgccatcggatgtgcccagatgggattagctagtaggtggggtaacggctcacctaggcgacgatccctagctggtctgagaggatgaccagccacactggaactgagacacggtccagactcctacgggaggcagcagtggggaatattgcacaatgggcgcaagcctgatgcagccatgccgcgtgtatgaagaaggccttcgggttgtaaagtactttcagcgaggaggaatgacgttactcgcagaagaagcaccggctaactccgtgccagcagccgcggtaatacggagggtgcaagcgtta…
Citrobacter_freundii	546	Citrobacter_freundii_complex_strain_ABFQG,_complete_genome_16S_complex_strain_ABFQG,_complete_genome_16S	gacgggtgagtaatgtctgggaaactgcccgatggagggggataactactggaaacggtagctaataccgcataacgcaagaccaaagaggtgccatcggatgtgcccagatgggattagctagtaggtggggtaacggctcacctaggcgacgatccctagctggtctgagaggatgaccagccacactggaactgagacacggtccagactcctacgggaggcagcagtggggaatattgcacaatgggcgcaagcctgatgcagccatgccgcgtgtatgaagaaggccttcgggttgtaaagtactttcagcgaggaggaatgacgttactcgcagaagaagcaccggctaactccgtgccagcagccgcggtaatacggagggtgcaagcgtta…
Citrobacter_werkmanii	67827	Citrobacter_werkmanii_strain_CDC_0876-58_16S_ribosomal_RNA,_partial_sequence	gacgggtgagtaatgtctgggaaactgcccgatggagggggataactactggaaacggtagctaataccgcataatgcaagaccaaagaggtgccatcggatgtgcccagatgggattagcttgtaggtggggtaacggctcacctaggcgacgatccctagctggtctgagaggatgaccagccacactggaactgagacacggtccagactcctacgggaggcagcagtggggaatattgcacaatgggcgcaagcctgatgcagccatgccgcgtgtatgaagaaggccttcgggttgtaaagtactttcagcgaggaggaatgacgttactcgcagaagaagcaccggctaactccgtgccagcagccgcggtaatacggagggtgcaagcgtta…
Cloacibacterium_normanense	237258	Cloacibacterium_normanense_strain_NRS1_16S_ribosomal_RNA,_partial_sequence	tacgggtgcggaacacgttgcaacctgcctttatctgggggatagcctttcgaaaggaagattaatactccataactaatattgaaagctccggatagagatgggcacgcgcaagattagctagttggtgaggtaacggctcaccaaggcgatgatctttagggggcctgagagggtgatcccccacactggtactgagacacggaccagactcctacgggaggcagcagtgaggaatattggtcaatgggtgcaagcctgaaccagccatcccgcgtgaaggacgactgcctatgggttgtaaacttcttttgtatagggatactgaaggtactatacgaataagcaccggctaactccgtgccagcagccgcggtaatacggagggtgcaagcgtta…
Clostridioides_difficile	1496	Clostridioides_difficile_P73_gcdP73.contig.5,_whole_genome_shotgun_sequence_16S	-------------------------------------------------------------------------------------------------------------------attagctagttggtaaggtaacggcttaccaaggcgacgatcagtagccgacctgagagggtgatcggccacattggaactgagacacggtccaaactcctacgggaggcagcagtggggaatattgcacaatgggcgaaagcctgatgcagcaacgccgcgtgagtgatgaaggccttcgggtcgtaaaactctgtcctcaaggaagaatgacggtacttgaggaggaagccccggctaactacgtgccagcagccgcggtaatacgtagggggctagcgtta…
Clostridium_argentinense	29341	Clostridium_argentinense_strain_ATCC_27322_16S_ribosomal_RNA,_partial_sequence	gacgggtgagtaacacgtggtaacctgcctctaagaggggaatagcctcccgaaagggagattaataccgcataaatttataccaaaggagcgctatgagatggacccgcggcgcattagctagttggtgaggtaagggctcaccaaggcaacgatgcgtagccgacctgagagggtgatcggccacattggaactgagacacggtccagactcctacgggaggcagcagtggggaatattgcgcaatgggggaaaccctgacgcagcaacgccgcgtgaatgaagaaggccttagggttgtaaagttctgtcatatgggaagaatgacggtaccatatgaggaagccacggctaactacgtgccagcagccgcggtaatacgtaggtggcaagcgttg…
Clostridium_beijerinckii	290402	Clostridium_beijerinckii_NCIMB_8052;_CP000721	gacgggtgagtaacacgtggtaacctgcctcatagaggggaatagcctttcgaaaggaagattaataccgcataagtagcaattaaaggagcgctatgagatggacccgcgtcgcattagctagttggtgaggtaacggctcaccaaggcgacgatgcgtagccgacctgagagggtgatcggccacattgggactgagacacggcccagactcctacgggaggcagcagtggggaatattgcacaatgggggaaaccctgatgcagcaacgccgcgtgagtgatgacggtcttcggattgtaaagctctgtcttcagggacgaatgacggtacctgaggaggaagccacggctaactacgtgccagcagccgcggtaatacgtaggtggcaagcgttg…
Clostridium_botulinum	1491	Clostridium_botulinum_strain_ELTDK_103_16S_ribosomal_RNA,_partial_sequence	gacgggtgagtaacacgtggtaacctgcctcaaagtgggggatagccttccgaaaggaagattaataccgcataacttcttatcaaagatttgctttgagatggacccgcggcgcattagctagttggtaaggtaacggcttaccaaggcaacgatgcgtagccgacctgagagggtgatcggccacattggaactgagacacggtccagactcctacgggaggcagcagtggggaatattgcgcaatgggggaaaccctgacgcagcaacgccgcgtgggtgatgaaggtcttcggattgtaaagccctgttttctgggacgaatgacggtaccagaggaggaagccacggctaactacgtgccagcagccgcggtaatacgtaggtggcgagcgttg…
Clostridium_butyricum	1492	Clostridium_butyricum_strain_VPI3266_16S_ribosomal_RNA,_partial_sequence	gacgggtgagtaacacgtggtaacctgcctcatagaggggaatagcctttcgaaaggaagattaataccgcataagcagcaattaaaggagcgctatgagatggacccgcgtcgcattagctagttggtgaggtaacggctcaccaaggcgacgatgcgtagccgacctgagagggtgatcggccacattgggactgagacacggcccagactcctacgggaggcagcagtggggaatattgcacaatgggggaaaccctgatgcagcaacgccgcgtgagtgatgacggtcttcggattgtaaagctctgtctttagggacgaatgacggtacctaaggaggaagccacggctaactacgtgccagcagccgcggtaatacgtaggtggcaagcgttg…
Clostridium_kluyveri	1534	Clostridium_kluyveri_NBRC_12016_DNA,_complete_genome_16S	---------------------------------------------------------------------------------------------------gatgggcccgcgtcgcattagctagttggagggataaaagccccccaaggcgacgatgcgtagccgacctgagagggtgaacggccacattggaactgagatacggtccagactcctacgggaggcagcagtggggaatattgcacaatgggggaaaccctgatgcagcaacgccgcgtgagtgaagaaggttttcggatcgtaaagctctgtcatccgggacgaatgacggtaccggaagaggaagccacggctaactacgtgccagcagccgcggtaatacgtaggtggcgagcgttg…
Clostridium_perfringens	1502	Clostridium_perfringens_strain_JCM_1290_16S_ribosomal_RNA,_partial_sequence	gacgggtgagtaacacgtggtaacctgcctcatagagtggaatagccttccgaaaggaagattaataccgcataatattcaaccaaaggagcgctatgagatggacccgcggcgcattagctagttggtggggtaacggcctaccaaggcgacgatgcgtagccgacctgagagggtgatcggccacattgggactgagacacggcccagactcctacgggaggcagcagtggggaatattgcacaatgggggaaaccctgatgcagcaacgccgcgtgagtgatgaaggttttcggatcgtaaagctctgtctttggggaagaatgacggtacccaaggaggaagccacggctaactacgtgccagcagccgcggtaatacgtaggtggcgagcgtta…
Clostridium_saccharoperbutylacetonicum	36745	Clostridium_saccharoperbutylacetonicum_strain_N1-4_16S_ribosomal_RNA,_partial_sequence	gacgggtgagtaacacgtggtaacctgcctcatagaggggaatagcctttcgaaaggaagattaataccgcataagcagcaattaaaggagcgctatgagatggacccgcgtcgcattagctagttggtgaggtaacggctcaccaaggcgacgatgcgtagccgacctgagagggtgatcggccacattgggactgagacacggcccagactcctacgggaggcagcagtggggaatattgcacaatgggggaaaccctgatgcagcaacgccgcgtgagtgatgacggtcttcggattgtaaagctctgtcttcagggacgaatgacggtacctgaggaggaagccacggctaactacgtgccagcagccgcggtaatacgtaggtggcaagcgttg…
Clostridium_sp.	641107	Clostridium_sp._DL-VIII;_CM001240	gacgggtgagtaacacgtggtaacctgcctcatagaggggaatagccttccgaaaggaagattaataccgcataagtagcaattaaaggagcgctatgagatggacccgcgtcgcattagctagttggtgaggtaacggctcaccaaggcgacgatgcgtagccgacctgagagggtgatcggccacattgggactgagacacggcccagactcctacgggaggcagcagtggggaatattgcacaatgggggaaaccctgatgcagcaacgccgcgtgagtgatgacggtcttcggattgtaaagctctgtcttcagggacgaatgacggtacctgaggaggaagccacggctaactacgtgccagcagccgcggtaatacgtaggtggcaagcgttg…
Comamonas_aquatica	225991	Comamonas_aquatica_strain_LMG_2370_16S_ribosomal_RNA,_partial_sequence	aacgggtgagtaatacatcggaacgtgcctagtagtgggggataactactcgaaagagtggctaataccgcatgagtacggatgaaagcagtgctactagagcggccgatggcagattaggtagttggtgggataaaagcttaccaagccgacgatctgtagctggtctgagaggacgatcagccacactgggactgagacacggcccagactcctacgggaggcagcagtggggaattttggacaatgggcgcaagcctgatccagcaatgccgcgtgcaggatgaaggccttcgggttgtaaactgcttttgtacggaacgaatgacggtaccgtaagaataagcaccggctaactacgtgccagcagccgcggtaatacgtagggtgcgagcgtta…
Corynebacterium_diphtheriae	698965	Corynebacterium_diphtheriae_CDCE_8392;_CP003211	aacgggtgagtaacacgtggtgatctgcctcgtacttcgggataagcctgggaaactgggtctaatactggataggtgtggtggaaagtttcggtacgagatgagcccgcggcctatcagcttgttggtggggtaatggcctaccaaggcgtcgacgggtagccggcctgagagggtggacggccacattgggactgagatacggcccagactcctacgggaggcagcagtggggaatattgcacaatgggcgcaagcctgatgcagcgacgccgcgtgggggatgacggccttcgggttgtaaacctctttcgctagggacgagtgacggtacctagataagaagcaccggctaactacgtgccagcagccgcggtaatacgtagggtgcgagcgttg…
Corynebacterium_imitans	156978	Corynebacterium_imitans_strain_2023_16S_ribosomal_RNA,_partial_sequence	aacgggtgagtaacacgtggtgatctgccctgtacttcgggataagcttgggaaactgggtctaataccggatatgggttgtggaaagcttcggtatgggatgagctcgcggcctatcagcttgttggtggggtaatggcctaccaaggcgtcgacgggtagccggcctgagagggtgtacggccacattgggactgagatacggcccagactcctacgggaggcagcagtggggaatattgcacaatgggcgcaagcctgatgcagcgacgccgcgtgggggatgacggccttcgggttgtaaactcctttcgcaaccgacgagtgacggtaggttgagaagaagcaccggctaactacgtgccagcagccgcggtaatacgtagggtgcgagcgttg…
Corynebacterium_sanguinis	2594913	Corynebacterium_sanguinis_strain_Marseille-P8776_16S_ribosomal_RNA_gene,_partial_sequence	aacgggtgagtaacacgtggtgatctgccctgtacttcgggataagcttgggaaactgggtctaataccggatagggtggttggaaagcttcggtatgggatgagctcgcggcctatcagcttgttggtggggtaatggcctaccaaggcgtcgacgggtagccggcctgagagggtgtacggccacattgggactgagatacggcccagactcctacgggaggcagcagtggggaatattgcacaatgggcgcaagcctgatgcagcgacgccgcgtgggggatgacggccttcgggttgtaaactcctttcgtcagggacgagtgacggtacctggataagaagcaccggctaactacgtgccagcagccgcggtaatacgtagggtgcgagcgttg…
Corynebacterium_stationis	1705	Corynebacterium_stationis_strain_ATCC_14403_16S_ribosomal_RNA,_partial_sequence	aacgggtgagtaacacgtggtgatctgccctgcactgtgggataagcctgggaaactgggtctaataccatataggtgtggtggaaagcttcggtgtgggatgagcctgcggcctatcagcttgttggtggggtaatggcctaccaaggcggcgacgggtatccggcctgagagggtgtacggacacattgggactgagatacggcccagactcctacgggaggcagcagtggggaatattgcacaatgggcgcaagcctgatgcagcgacgccgcgtgggggatgaaggccttcgggttgtaaactcctttcgctatcgacgagtgacggtaggtagataagaagcaccggctaactacgtgccagcagccgcggtaatacgtagggtgcaagcgttg…
Cronobacter_sakazakii	28141	Cronobacter_sakazakii_strain_ATCC_29544_16S_ribosomal_RNA,_partial_sequence	gacgggtgagtaatgtctgggaaactgcctgatggagggggataactactggaaacggtagctaataccgcataactacggaccaaagtggtgccatcagatgtgcccagatgggattagctagtaggtggggtaacggctcacctaggcgacgatccctagctggtctgagaggatgaccagccacactggaactgagacacggtccagactcctacgggaggcagcagtggggaatattgcacaatgggcgcaagcctgatgcagccatgccgcgtgtatgaagaaggccttcgggttgtaaagtactttcagcggggaggaatgacgttacccgcagaagaagcaccggctaactccgtgccagcagccgcggtaatacggagggtgcaagcgtta…
Deferribacter_desulfuricans	639282	Deferribacter_desulfuricans_SSM1_16S_ribosomal_RNA,_partial_sequence	gacgggtgagtaacgcgtagcaacctaccccgcagaccgggataacccatcgaaaggtgggctaatactggatgagtgtgtgaaaaggcagcgctgcgggatgggctcgcgtcccattagctagttggtgaggtaacggctcaccaaggctacgatgggtagccggcctgagagggtggtcggccacattgggactgagacacggcccagactcctacgggaggcagcagtggggaatattgcgcaatgccggaaacggtgacgcagcgacgccgcgtgggcgaggaaggccttcgggtcgtaaagccctttcagtggggaagagtgacggtacccacagaagaagccccggctaactccgtgccagcagccgcggtaatacggagggggcgagcgttg…
Dehalobacterium_formicoaceticum	51515	Dehalobacterium_formicoaceticum;_DMC;_X86690	-------------------------------------------------------------------------------------------cgattaaggatggacccgcgtctgattagctagttggtagggtaacggcttaccaaggcaacgatcagtagccggcctgagagggtgaccggccacactgggactgagacacggcccagactcctacgggaggcagcagtggggaatcttccgcaatgggcgcaagcctgacggagcaacgccgcgtgaatgaagaaggccttcgggtcgtaaagttctgtcgagagggaagagtgacggtaccattcgaggaagctccggctaactacgtgccagcagccgcggtaatacgtagggggcaagcgttg…
Desulfobulbus_oralis	1986146	Desulfobulbus_oralis_strain_HOT041/ORNL_chromosome,_complete_genome_16S	-------------tgcgt------------------------------------------------acca----------------------------------------------ttagctagtaggtggggtaatggcctacctaggcgacgatggttagcgggtctgagaggatgatccgccacactggcactggaatacgggccagactcctacgggaggcagcagtgaggaatattgcgcaatgggggcaaccctgacgcagcgacgccgcgtgagtgaggaaggtcttcggatcgtaaagctctgtcaagagggaagaatgacggtacctctaaaggaagcaccggctaactccgtgccagcagccgcggtaatacggagggtgcgagcgttg…
Eikenella_corrodens	539	Eikenella_corrodens_strain_JCM_12952_16S_ribosomal_RNA,_partial_sequence	aacgggtgagtaatatatcggaacgtaccgagtaatgggggataaccaatcgaaagattggctaataccgcatacgtacgggagaaagcggcgttattcgagcggccgataactgattagctagttggtggggtaaaggcctaccaaggcgacgatcagtagcgggtctgagaggacgatccgccacactgggactgagacacggcccagactcctacgggaggcagcagtggggaattttggacaatgggggcaaccctgatccagccatgccgcgtgtatgaagaaggccttcgggttgtaaagtacttttgttagggaagaatgacggtacctaaagaataagcaccggctaactacgtgccagcagccgcggtaatacgtagggtgcgagcgtta…
Elizabethkingia_anophelis	1338011	Elizabethkingia_anophelis_NUHP1;_CP007547	tacgggtgcggaacacgttgcaacctgcctttatcagggggatagcctttcgaaaggaagattaataccccataattgatattgaaaactatggatagagatgggcacgcgcaagattagctagttggtgaggtaacggctcaccaaggcgacgatctttagggggcctgagagggtgatcccccacactggtactgagacacggaccagactcctacgggaggcagcagtgaggaatattggacaatgggtggaagcctgatccagccatcccgcgtgcaggaagacggcctatgggttgtaaactgcttttatctggggatactgaaggtaccagaagaataagcaccggctaactccgtgccagcagccgcggtaatacggagggtgcaagcgtta…
Elizabethkingia_meningoseptica	238	Elizabethkingia_meningoseptica_strain_ATCC_13253_16S_ribosomal_RNA,_partial_sequence	tacgggtgcggaacacgttgcaacctgcctttatcagggggatagcctttcgaaaggaagattaataccccataattgatattgaaaactatggatagagatgggcacgcgcaagattagctagttggtgaggtaacggctcaccaaggcgacgatctttagggggcctgagagggtgatcccccacactggtactgagacacggaccagactcctacgggaggcagcagtgaggaatattggacaatgggtggaagcctgatccagccatcccgcgtgcaggaagacggcctatgggttgtaaactgcttttatctggggatactgaaggtaccagaagaataagcaccggctaactccgtgccagcagccgcggtaatacggagggtgcaagcgtta…
Elizabethkingia_miricola	172045	Elizabethkingia_miricola_strain_W3-B1_16S_ribosomal_RNA,_partial_sequence	tacgggtgcggaacacgttgcaacctgcctttatcaaggggatagcctttcgaaaggaagattaataccctataatttatattgaaaactatggataaagatgggcacgcgcaagattagctagttggtgaggtaacggctcaccaaggcgacgatctttagggggcctgagagggtgatcccccacactggtactgagacacggaccagactcctacgggaggcagcagtgaggaatattggacaatgggtggaagcctgatccagccatcccgcgtgtaggaagacggcctatgggttgtaaactacttttatctggggatactgaaggtaccagatgaataagcaccggctaactccgtgccagcagccgcagtaatacggagggtgcaagcgtta…
Empedobacter_brevis	247	Empedobacter_brevis_strain_LMG_4011_16S_ribosomal_RNA,_partial_sequence	cacgggtgcgtaacgcgttgcaacttgccctactgaaaaggatagcccttcgaaaggaggattaatactttataactaattttgaaagattcgcagtaggataggcatgcgtaagattagttagttggagaggtaacggctcaccaagacgatgatctttagggggcctgagagggtgaacccccacactggtactgagacacggaccagactcctacgggaggcagcagtgaggaatattggacaatgggtggaagcctgatccagccatcccgcgtgtaggacgactgcttatgggttgtaaactacttttatctggggatactgaaggtaccagaagaataagcaccggctaactccgtgccagcagccgcggtaatacggagggtgcaagcgtta…
Enterobacter_asburiae	61645	Enterobacter_asburiae_strain_JCM6051_16S_ribosomal_RNA,_partial_sequence	gacgggtgagtaatgtctgggaaactgcctgatggagggggataactactggaaacggtagctaataccgcataacgcaagaccaaagaggtgccatcagatgtgcccagatgggattagctagtaggtggggtaacggctcacctaggcgacgatccctagctggtctgagaggatgaccagccacactggaactgagacacggtccagactcctacgggaggcagcagtggggaatattgcacaatgggcgcaagcctgatgcagccatgccgcgtgtatgaagaaggccttcgggttgtaaagtactttcagcggggaggaatgacgttacccgcagaagaagcaccggctaactccgtgccagcagccgcggtaatacggagggtgcaagcgtta…
Enterobacter_cancerogenus	69218	Enterobacter_cancerogenus_strain_LMG_2693_16S_ribosomal_RNA,_partial_sequence	gacgggtgagtaatgtctgggaaactgcctgatggagggggataactactggaaacggtagctaataccgcataacgcaagaccaaagaggtgccatcagatgtgcccagatgggattagctagtaggtggggtaacggctcacctaggcgacgatccctagctggtctgagaggatgaccagccacactggaactgagacacggtccagactcctacgggaggcagcagtggggaatattgcacaatgggcgcaascctgatgcagccatgccgcgtgtatgaagaaggccttcgggttgtaaagtactttcagcggggaggaatgacgttacccgcagaaraagcaccggctaactccgtgccagcagccgcggtaatacggagggtgcaagcgtta…
Enterobacter_cloacae	550	Enterobacter_cloacae_strain_279-56_16S_ribosomal_RNA,_partial_sequence	gacgggtgagtaatgtctgggaaactgcctgatggagggggataactactggaaacggtagctaataccgcataaygcaagaccaaagaggtgccatcagatgtgcccagatgggattagctagtaggtggggtaacggctcacctaggcgacgatccctagctggtctgagaggatgaccagccacactggaactgagacacggtccagactcctacgggaggcagcagtggggaatattgcacaatgggcgcaagcctgatgcagccatgccgcgtgtatgaagaaggccttcgggttgtaaagtactttcagcggggaggaatgacgttacccgcagaagaagcaccggctaactccgtgccagcagccgcggtaatacggagggtgcaagcgtta…
Enterobacter_hormaechei	158836	Enterobacter_hormaechei_strain_0992-77_16S_ribosomal_RNA,_partial_sequence	gacgggtgagtaatgtctgggaaactgcctgatggagggggataactactggaaacggtagctaataccgcataacgcaagaccaaagaggtgccatcggatgtgcccagatgggattagctagtaggtggggtaacggctcacctaggcgacgatccctagctggtctgagaggatgaccagccacactggaactgagacacggtccagactcctacgggaggcagcagtggggaatattgcacaatgggcgcaagcctgatgcagccatgccgcgtgtatgaagaaggccttcgggttgtaaagtactttcagcggggaggaatgacgttacccgcagaagaagcaccggctaactccgtgccagcagccgcggtaatacggagggtgcaagcgtta…
Enterobacter_kobei	208224	Enterobacter_kobei_strain_CIP_105566_16S_ribosomal_RNA,_partial_sequence	gacgggtgagtaatgtctgggaaactgcctgatggagggggataactactggaaacggtagctaataccgcataacgcaagaccaaagaggtgccatcagatgtgcccagatgggattagctagtaggtggggtaacggctcacctaggcgacgatccctagctggtctgagaggatgaccagccacactggaactgagacacggtccagactcctacgggaggcagcagtggggaatattgcacaatgggcgcaagcctgatgcagccatgccgcgtgtatgaagaaggccttcgggttgtaaagtactttcagcggggaggaatgacgttacccgcagaagaagcaccggctaactccgtgccagcagccgcggtaatacggagggtgcaagcgtta…
Enterobacter_ludwigii	299767	Enterobacter_ludwigii_strain_EN-119_16S_ribosomal_RNA,_partial_sequence	gacgggtgagtaatgtctgggaaactgcctgatggagggggataactactggaaacggtagctaataccgcataacgcaagaccaaagaggtgccatcagatgtgcccagatgggattagctagtaggtggggtaacggctcacctaggcgacgatccctagctggtctgagaggatgaccagccacactggaactgagacacggtccagactcctacgggaggcagcagtggggaatattgcacaatgggcgcaagcctgatgcagccatgccgcgtgtatgaagaaggccttcgggttgtaaagtactttcagcggggaggaatgacgttacccgcagaagaagcaccggctaactccgtgccagcagccgcggtaatacggagggtgcaagcgtta…
Enterobacter_roggenkampii	1812935	Enterobacter_roggenkampii_strain_AKP_B1_16S_ribosomal_RNA_gene,_partial_sequence	gacgggtgagtaatgttcggaaaactgcctgatggagggggataactactggaaacggtagctaataccgcataacgcaagaccaaagaggtgccatcagatgtgcccagatgggattagctagtaggtggggtaacggctcacctaggcgacgatccctagctggtctgagaggatgaccagccacactggaactgagacacggtccagactcctacgggaggcagcagtggggaatattgcacaatgggcgcaagcctgatgcagccatgccgcgtgtatgaagaaggccttcgggttgtaaagtactttcagcggggaggaatgacgttacccgcagaagaagcaccggctaactccgtgccagcagccgcggtaatacggagggtgcaagcgtta…
Enterobacter_sp.	1560339	Enterobacter_sp._SST3_contig36,_whole_genome_shotgun_sequence_16S	-------------------------------------------------------------------------------------------------------------------attagctagtaggtggggtaacggctcacctaggcgacgatccctagctggtctgagaggatgaccagccacactggaactgagacacggtccagactcctacgggaggcagcagtggggaatattgcacaatgggcgcaagcctgatgcagccatgccgcgtgtatgaagaaggccttcgggttgtaaagtactttcagcggggaggaatgacgttacccgcagaagaagcaccggctaactccgtgccagcagccgcggtaatacggagggtgcaagcgtta…
Enterobacteriaceae_bacterium	2066051	Enterobacteriaceae_bacterium_ENNIH1_chromosome,_complete_genome_16S	gacgggtgagtaatgtctgggaaactgcccgatggagggggataactactggaaacggtagctaataccgcataatgcaagaccaaagaggtgccatcggatgtgcccagatgggattagctagtaggtggggtaatggctcacctaggcgacgatccctagctggtctgagaggatgaccagccacactggaactgagacacggtccagactcctacgggaggcagcagtggggaatattgcacaatgggcgcaagcctgatgcagccatgccgcgtgtgtgaagaaggccttcgggttgtaaagcactttcagcggggaggaatgacgttacccgcagaagaagcaccggctaactccgtgccagcagccgcggtaatacggagggtgcaagcgtta…
Enterococcus_casseliflavus	37734	Enterococcus_casseliflavus_strain_NBRC_100478_16S_ribosomal_RNA,_partial_sequence	aacgggtgagtaacacgtggtaacctgcccatcagaaggggataacacttggaaacaggtgctaataccgtataacgaaagttgaaaggcgcactgatggatggacccgcggtgcattagctagttggtgaggtaacggctcaccaaggcaacgatgcatagccgacctgagagggtgatcggccacactgggactgagacacggcccagactcctacgggaggcagcagtagggaatcttcggcaatggacgaaagtctgaccgagcaacgccgcgtgagtgaagaaggttttcggatcgtaaaactctgttgttagagaagagtgacggtatctaaccagaaagccacggctaactacgtgccagcagccgcggtaatacgtaggtggcaagcgttg…
Enterococcus_cecorum	44008	Enterococcus_cecorum_strain_A60_16S_ribosomal_RNA,_partial_sequence	aacgggtgagtaacacgtggtaacctgcccatcagcgggggataacacttggaaacaggtgctaataccgcataatgatggatgaaaggcgcactgatggatggacccgcggtgcattagctagttggtggggtaacggcctaccaaggctgcgatgcatagccgacctgagagggtgatcggccacactgggactgagacacggcccagactcctacgggaggcagcagtagggaatcttcggcaatggacgcaagtctgaccgagcaacgccgcgtgagtgaagaaggttttcggatcgtaaaactctgttgttagagaagagtgacggtatctaaccagaaagccacggctaactacgtgccagcagccgcggtaatacgtaggtggcaagcgttg…
Enterococcus_durans	53345	Enterococcus_durans_strain_98D_16S_ribosomal_RNA,_partial_sequence	aacgggtgagtaacacgtggtaacctgcccatcagaaggggataacacttggaaacaggtgctaataccgtataacttgatttgaaaggcgcgctgatggatggacccgcggtgcattagctagttggtgaggtaacggctcaccaaggccacgatgcatagccgacctgagagggtgatcggccacattgggactgagacacggcccaaactcctacgggaggcagcagtagggaatcttcggcaatggacgaaagtctgaccgagcaacgccgcgtgagtgaagaaggttttcggatcgtaaaactctgttgttagagaagagtgacggtatctaaccagaaagccacggctaactacgtgccagcagccgcggtaatacgtaggtggcaagcgttg…
Enterococcus_faecalis	1351	Enterococcus_faecalis_strain_JCM_5803_16S_ribosomal_RNA,_partial_sequence	gacgggtgagtaacacgtggtaacctacccatcagagggggataacacttggaaacaggtgctaataccgcataactaagagtgaaaggcgcgctgatggatggacccgcggtgcattagctagttggtgaggtaacggctcaccaaggccacgatgcatagccgacctgagagggtgatcggccacactgggactgagacacggcccagact-ctacgggaggcagcagtagggaatcttcggcaatggacgaaagtctgaccgagcaacgccgcgtgagtgaagaaggttttcggatcgtaaaactctgttgttagagaagagtgacggtatctaaccagaaagccacggctaactacgtgccagcagccgcggtaatacgtaggtggcaagcgttg…
Enterococcus_faecium	1352	Enterococcus_faecium_strain_LMG_11423_16S_ribosomal_RNA,_partial_sequence	aacgggtgagtaacacgtggtaacctgcccatcagaaagggataacacttggaaacaggtgctaataccgtataacttgatttgaaaggcgcgctgatggatggacccgcggtgcattagctagttggtgaggtaacggctcaccaaggccacgatgcatagccgacctgagagggtgatcggccacattgggactgagacacggcccaaact-ctacgggaggcagcagtagggaatcttcggcaatggacgaaagtctgaccgagcaacgccgcgtgagtgaagaaggttttcggatcgtaaaactctgttgttagagaagagtgacggtatctaaccagaaagccacggctaactacgtgccagcagccgcggtaatacgtaggtggcaagcgttg…
Enterococcus_gallinarum	1353	Enterococcus_gallinarum_strain_NBRC_100675_16S_ribosomal_RNA,_partial_sequence	aacgggtgagtaacacgtggtaacctgcccatcagaaggggataacacttggaaacaggtgctaataccgtataacgaaagttgaaaggcgcactgatggatggacccgcggtgcattagctagttggtgaggtaacggctcaccaaggccacgatgcatagccgacctgagagggtgatcggccacactgggactgagacacggcccagactcctacgggaggcagcagtagggaatcttcggcaatggacgaaagtctgaccgagcaacgccgcgtgagtgaagaaggttttcggatcgtaaaactctgttgttagagaagagtgacggtatctaaccagaaagccacggctaactacgtgccagcagccgcggtaatacgtaggtggcaagcgttg…
Enterococcus_gilvus	160453	Enterococcus_gilvus_strain_ATCC_BAA-350_16S_ribosomal_RNA,_partial_sequence	aacgggtgagtaacacgtggtaacctgcccatcagaaggggataacacttggaaacaggtgctaataccgtataactctatttgaaaggcgcactgatggatggacccgcggtgcattagctagttggtgaggtaacggctcaccaaggcaacgatgcatagccgacctgagagggtgatcggccacattgggactgagacacggcccaaactcctacgggaggcagcagtagggaatcttcggcaatggacgaaagtctgaccgagcaacgccgcgtgagtgaagaaggttttcggatcgtaaaactctgttgttagagaagagtgacggtatctraccagaaagccacggctaactacgtgccagcagccgcggtaatacgtaggtggcaagcgttg…
Enterococcus_hirae	768486	Enterococcus_hirae_ATCC_9790_16S_ribosomal_RNA,_partial_sequence	aacgggtgagtaacacgtggtaacctgcccatcagaaggggataacacttggaaacaggtgctaataccgtataacttgatttgaaaggcgcgctgatggatggacccgcggtgcattagctagttggtgaggtaacggctcaccaaggcgacgatgcatagccgacctgagagggtgatcggccacattgggactgagacacggcccaaactcctacgggaggcagcagtagggaatcttcggcaatggacgaaagtctgaccgagcaacgccgcgtgagtgaagaaggttttcggatcgtaaaactctgttgttagagaagagtgacggtatctaaccagaaagccacggctaactacgtgccagcagccgcggtaatacgtaggtggcaagcgttg…
Enterococcus_sp.	2057791	Enterococcus_sp._CR-Ec1_chromosome,_complete_genome_16S	-----g---------------------------------------------------------------------------------------------gatggacccgcggtgcattagctagttggtgaggtaacggctcaccaaggcaacgatgcatagccgacctgagagggtgatcggccacactgggactgagacacggcccagactcctacgggaggcagcagtagggaatcttcggcaatggacgaaagtctgaccgagcaacgccgcgtgagtgaagaaggttttcggatcgtaaaactctgttgttagagaagagtgacggtatctaaccagaaagccacggctaactacgtgccagcagccgcggtaatacgtaggtggcaagcgttg…
Enterococcus_thailandicus	417368	Enterococcus_thailandicus_strain_FP48-3_16S_ribosomal_RNA,_partial_sequence	aacgggtgagtaacacgtggtaacctgcccatcagaaggggataacacttggaaacaggtgctaataccgtataacttgatttgaaaggcgcgctgatggatggacccgcggtgcattagctagttggtgaggtaacggctcaccaaggccacgatgcatagccgacctgagagggtgatcggccacattgggactgagacacggcccaaactcctacgggaggcagcagtagggaatcttcggcaatggacgaaagtctgaccgagcaacgccgcgtgagtgaagaaggttttcggatcgtaaaactctgttgttagagaagagtgacggtatctaaccagaaagccacggctaactacgtgccagcagccgcggtaatacgtaggtggcaagcgttg…
Enterococcus_wangshanyuanii	2005703	Enterococcus_wangshanyuanii_strain_MN05_16S_ribosomal_RNA,_partial_sequence	gacgggtgagtaacacgtggtaacctgcccatcagaaggggataacacttggaaacaggtgctaataccgtataacttgatttgaaagacgcactgatggatggacccgcggtgcattagctagttggtgaggtaacggctcaccaaggcgatgatgcatagccgacctgagagggtgatcggccacactgggactgagacacggcccagactcctacgggaggcagcagtagggaatcttcggcaatggacgaaagtctgaccgagcaacgccgcgtgagtgaagaaggttttcggatcgtaaaactctgttgttagagaagagtgacggtatctaaccagaaagccacggctaactacgtgccagcagccgcggtaatacgtaggtggcaagcgttg…
Escherichia_coli	562	Escherichia_coli_strain_U_May-41_16S_ribosomal_RNA,_partial_sequence	gacgggtgagtaatgtctgggaaactgcctgatggagggggataactactggaaacggtagctaataccgcataacgcaagcacaaagaggtgccatcggatgtgcccagatgggattagctagtaggtggggtaacggctcacctaggcgacgatccctagctggtctgagaggatgaccagcaacactggaactgagacacggtccagactcctacgggaggcagcagtggggaatattgcacaatgggcgcaagcctgatgcagccatgcngcgtgtatgaagaaggccttcgggttgtaaagtactttcagcggggaggaatgacgttacccgcagaagaagcaccggctaactccgtgccagcagccgcggtaatacggagggtgcaagcgtta…
Eubacterium_sulci	888727	Eubacterium_sulci_ATCC_35585_16S_ribosomal_RNA,_partial_sequence	gacgggtgagtaacgcgtggcaacctgccctgtacagggggatagccacccgaaaaggtgattaataccccataaccacttgtcaaagattcggtataggatgggcctgcgtctgattagctagttggtagggtaacggcttaccaaggcaacgatcagtagccgacctgagagggtgatcggccacattggaactgagacacggtccaaactcctacgggaggcagcagtggggaatattgcacaatgggcgcaagcctgatgcagcaacgccgcgtgaaggatgaaggccttcgggttgtaaacttctgtcctaggggaagaatgacattacccttggaggaagccccggctaactacgtgccagcagccgcggtaatacgtagggggcgagcgtta…
Faecalibacterium_prausnitzii	853	Faecalibacterium_prausnitzii_strain_ATCC_27768_16S_ribosomal_RNA,_partial_sequence	aacgggtgagtaacgcgtaggaacctgcctcaaagagggggacaacagttggaaacgactgctaataccgcataagtagagggaaaaggagcgctttgagatggcctcgcgtccgattagctagttggtgaggtaacggcccaccaaggcgacgatcggtagccggactgagaggttgaacggccacattgggactgagacacggcccagactcctacgggaggcagcagtggggaatattgcacaatgggggaaaccctgatgcagcgacgccgcgtggaggaagaaggtcttcggattgtaaactcctgttgttgaggaagaatgacggtactcaacaaggaagtgacggctaactacgtgccagcagccgcggtaaaacgtaggtcacaagcgttg…
Faecalitalea_cylindroides	717960	Faecalitalea_cylindroides_T2-87;_FP929041	aacgggtgagtaacacgtggtaacctgcccatgtgcccgggacaacgcctggaaacgggtgctaaaaccggataggtttctattaaaggggtgaacatggatggacctgcggtgcattagctagttggtgaggtaacggcccaccaaggcgacgatgcatagccgacctgagagggcgaacggccacattgggactgagacacggcccaaactcctacgggaggcagcagtagggaattttcgtcaatggggggaaccctgaacgagcaatgccgcgtgagtgaagacggtcttcggattgtaaagctctgttgcgagagaaaagtgatggtatctcgccagaaagtcacggctaactacgtgccagcagccgcggtaatacgtaggtggcgagcgtta…
Filifactor_alocis	546269	Filifactor_alocis;_ATCC_35896;_AJ006962	gacgggtgcgtaacgcgtggtaatctgcctttgtcaaaggaataactattcgaaagaatagctaaaaccgtataacataatatcaaaacgatggacaaagatgagcccgcgtctgattagctagttggtgagataaaagcccaccaaggcaacgatcagtagccgacctgagagggtgaacggccacattggaactgagacacggtccaaactcctacgggaggcagcagtggggaatattgcacaatggggggaaccctgatgcagcaacgccgcgtgagtgaagaaggcattcgtgtcgtaaaactctgtagtaggggaagaatgacagtaccctaaaagaaagccccggctaactacgtgccagcagccgcggtaatacgtagggggcaagcgtta…
Flavobacteriaceae_bacterium	1150389	Flavobacteriaceae_bacterium_UJ101,_complete_genome_16S	gacgggtgcgtaacgcgttacaacttgcctatcactaggggatagccattggaaacgatgaataataccctatggttaatagtaaaggtta-ggtgatagatgggtatgcgtccaattagctagttggtgcggtaacggcgtaccaaggcgatgattggtagggggcctgagagggtgaacccccacactggtactgagacacggaccagactcctacgggaggcagcagtgaggaatattggtcaatggagggaactctgaaccagccatcccgcgtgtaggaagacggcttatgggttgtaaactacttttatacaggaagactgacggtactgtaggaataagcaccggctaactccgtgccagcagccgcggtaatacggagggtgcgagcgtta…
Fusobacterium_hwasookii	1583098	Fusobacterium_hwasookii_ChDC_F206,_complete_genome_16S	-----------------------------------------------------------------------------------------------------------tgcgtcccattagctagttggagaggtaacggctcaccaaggcgatgatgggtagccggcctgagagggtgaacggccacaaggggactgagacacggcccttactcctacgggaggcagcagtggggaatattggacaatggacaagagtctgatccagcaattctgtgtgcacgatgaagtttttcggaatgtaaagtgctttcagttgggaagaatgacggtaccaacagaagaagtgacggctaaatacgtgccagcagccgcggtaatacgtatgtcacaagcgtta…
Fusobacterium_nucleatum	851	Fusobacterium_nucleatum_subsp._nucleatum_ATCC_23726;_HM347070	gacgggtgagtaacgcgtaagaacttgcctcacagctagggacaacatttggaaacgaatgctaatacctgatattgaattatgaaagctacgctgtgagagagctttgcgtcccattagctagttggagaggtaacggctcaccaaggcgatgatgggtagccggcctgagagggtgaacggccacaaggggactgagacacggcccttactcctacgggaggcagcagtggggaatattggacaatggacgagagtctgatccagcaattctgtgtgcacgatgacgtttttcggaatgtaaagtgctttcagttgggaagaatgacggtaccaacagaagaagtgacggctaaatacgtgccagcagccgcggtaatacgtatgtcacgagcgtta…
Fusobacterium_periodonticum	860	Fusobacterium_periodonticum_strain_EK1-15_16S_ribosomal_RNA,_partial_sequence	gacgggtgagtaacgcgtaagaacttgcctcncngttagggacaacatttggaaacgaatgctaatncctnatattagattatgaaagctacgctgtgagagagctttgcgtcccattagctagttggagaggtaacggctcaccaaggcgatgatgggtagccggcctgagagggtgaacggccacaaggggactgagacncggcccnnnctcctacgggaggcngcngtggggaatattggacaatggacaanagtctgatccagcnattctgtgtgcncgatgacgtttttcggaatgtaaagtgctttcagttgggaagaatgacggtaccaacagaagaagtgacggctaaatacgtgccagcagccgcggtaatacgtatgtcacnagcgtta…
Fusobacterium_pseudoperiodonticum	2663009	Fusobacterium_pseudoperiodonticum_culture_KCOM:2653_16S_ribosomal_RNA_gene,_partial_sequence	gacgggtgagtaacgcgtaagaacttgcctcacagttagggacaacatttggaaacgaatgctaatacctgatattagattatgaaagctacgctgtgagagagctttgcgtcccattagctagttggagaggtaacggctcaccaaggcgatgatgggtagccggcctgagagggtgaacggccacaaggggactgagacacggcccttactcctacgggaggcagcagtggggaatattggacaatggacaaaagtctgatccagcaattctgtgtgcacgatgacgtttttcggaatgtaaagtgctttcagttgggaagaatgacggtaccaacagaagaagtgacggctaaatacgtgccagcagccgcggtaatacgtatgtcacaagcgtta…
Fusobacterium_ulcerans	469617	Fusobacterium_ulcerans_(T);_NCTC_12111T;_X55412	gacgggtnagtaacgcgtaagaacttgcctcacngactgggacaacatttggaaacgaatgctaataccggatatttggttatgaaagctacgctgtgagagagctttgcgtcccattagttagttggtgaggtaacggctcaccaagacgatgatgggtagccggcctgagagggtgaacggccacaaggggactgagacacggcccnnnctcctacgggaggcngcngtggggaatattggacaatggacaaaagtctgatccagcnattctgtgtgcacgatgaagtttttcggaatgtaaagtgctttcagttgggaagagtgacggtaccaacagaagaagcgacggctaaatacgtgccagcagccgcggtaatacgtatgtcgcnagcgtta…
Gemella_haemolysans	1379	Gemella_haemolysans_strain_ATCC_25563_16S_ribosomal_RNA,_partial_sequence	aacgggtgagtaacacgtaagaacctgcctcatagactgggacaactattggaaacgatagctaataccggataacgatgtttaaaagttgcactatgagatggctttgcggtgcattagctagttggtggggtaaaggcctaccaaggcgacgatgcatagccgacctgagagggtgatcggccacactgggactgagacacggcccagactcctacgggaggcagcagtagggaatcttccgcaatgggcgaaagcctgacggagcaacgccgcgtgagtgaagaaggatttcggttcgtaaagctctgttgttagggaagagagacggtacctaaccagaaagccacggctaactacgtgccagcagccgcggtaatacgtaggtggcaagcgttg…
Gemella_morbillorum	29391	Gemella_morbillorum_strain_2917B_16S_ribosomal_RNA,_partial_sequence	aacgggtgagtaacacgtaagaacctgcctcatagactgggacaactattggaaacgatagctaataccggataacgatatttaaaagttgcactatgagatggctttgcggtgcattagctagttggtggggtaaaggcccaccaaggcgacgatgcatagccgacctgagagggtgatcggccacactgggactgagacacggcccagactcctacgggaggcagcagtagggaatcttccgcaatgggcgaaagcctgacggagcaacgccgcgtgagtgaagaaggatttcggttcgtaaagctctgttgttagggaagagagacggtacctaaccagaaagccacggctaactacgtgccagcagccgcggtaatacgtaggtggcaagcgttg…
Gemella_sanguinis	84135	Gemella_sanguinis_strain_2045-94_16S_ribosomal_RNA,_partial_sequence	aacgggtgagtaacacgtaagaacctgcctcatagacggggacaactattggaaacgatagctaataccggataactatgtttaaaagttgcactatgagatggctttgcggtgcattagctagttggtggggtaaaggcctaccaaggcgacgatgcatagccgacctgagagggtgatcggccacactgggactgagacacggcccagactcctacgggaggcagcagtagggaatcttccgcaatgggcgaaagcctgacggagcaacgccgcgtgagtgaagaaggatttcggttcgtaaagctctgttgttagggaagagagacggtacctaaccagaaagccacggctaactacgtgccagcagccgcggtaatacgtaggtggcaagcgttg…
Gemella_sp.	1785995	Gemella_sp._oral_taxon_928_strain_W2231_chromosome,_complete_genome_16S	-----------------------------------------------------------------------------------------------------------tgcggagcattagctagttggtgggataaaagcctaccaaggcgacgatgcatagccgacctgagagggtgaacggccacattgggactgagacacggcccaaactcctacgggaggcagcagtagggaatcttccgcaatggacgaaagtctgacggagcaacgccgcgtgagtgaagaaggatttcggttcgtaaagctctgttgttagggaagacagacggtacctaaccagaaagccacggctaactacgtgccagcagccgcggtaatacgtaggtggcaagcgttg…
Haemophilus_haemolyticus	726	Haemophilus_haemolyticus_strain_CIP_103290_16S_ribosomal_RNA,_partial_sequence	gacgggtgagtaatgcttgggaatctggcttatggagggggataactacgggaaactgtagctaataccgcgtagtgagagacgaaagtgctgccatgagatgagcccaagtgggattaggtagttggtggggtaaaggcctaccaagcctgcgatctctagctggtctgagaggatggccagccacactggaactgagacacggtccagactcctacgggaggcagcagtggggaatattgcgcaatggggggaaccctgacgcagccatgccgcgtgaatgaagaaggccttcgggttgtaaagttctttcggtattgaggaatgacgttaaatacagaagaagcaccggctaactccgtgccagcagccgcggtaatacggagggtgcgagcgtta…
Haemophilus_influenzae	727	Haemophilus_influenzae_strain_680_16S_ribosomal_RNA,_partial_sequence	gacgggtgagtaatgcttgggaatctggcttatggagggggataacgacgggaaactgtcgctaataccgcgtattggaagatgaaagtgctgccataggatgagcccaagtgggattaggtagttggtggggtaaatgcctaccaagcctgcgatctctagctggtctgagaggatgaccagccacactggaactgagacacggtccagactcctacgggaggcagcagtggggaatattgcgcnatggggggaaccctgacgcagccatgccgcgtgaatgaagaaggccttcgggttgtaaagttctttcggtattgaggaatgacgttaaatacagaagaagcaccggctaactccgtgccagcagccgcggtaatacggagngtgcgagcgtta…
Haemophilus_parahaemolyticus	735	Haemophilus_parahaemolyticus_strain_536_16S_ribosomal_RNA,_partial_sequence	gacgggtgagtaatgcttgggaatctggcttatggagggggataactacgggaaactgtagctaataccgcgtaatttcggattaaagtgttgccatgagatgagcccaagtgggattaggtagttggtggggtaaaggcctaccaagccgacgatctctagctggtctgagnnnatgaccagccacactggaactgagacacggtccagactcctacgggaggcagcagtggggaatattgcacaatggggggaaccctgatgcagccatgccgcgtgaatgaagaaggccttcgggttgtaaagttctttcggtagcgaggaatgacgttaactacagaagaagcaccggctaactccgtgccagcagccgcggtaatacggagggtgcgagcgtta…
Haemophilus_parainfluenzae	729	Haemophilus_parainfluenzae_T3T1;_FQ312002	gacgggtgagtaatgcttgggaatctagcttatggagggggataactacgggaaactgtagctaataccgcgtaatgaaagattaaagtgttgccataggatgagcccaagtgggattaggtagttggtgaggtaaaggctcaccaagccgacgatctctagctggtctgagaggatgaccagccacactgggactgagacacggcccagactcctacgggaggcagcagtggggaatattgcgcaatgggggcaaccctgacgcagccatgccgcgtgaatgaagaaggccttcgggttgtaaagttctttcggtagcgaggaatgacgttaactacagaagaagcaccggctaactccgtgccagcagccgcggtaatacggagggtgcgagcgtta…
Haemophilus_sp.	712310	Haemophilus_sp._oral_taxon_36_strain_F0629_chromosome,_complete_genome_16S	gacgggtgagtaatgcttgggaatctggtttatggagggggataactacgggaaactgtagctaataccgcgtagtggaagatgaaagtgctgccatgagatgagcccaagtgggattaggtagttggtggggtaaaggcctaccaagcctgcgatctctagctggtctgagaggatggccagccacactggaactgagacacggtccagactcctacgggaggcagcagtggggaatattgcgcaatggggggaaccctgacgcagccatgccgcgtgaatgaagaaggccttcgggttgtaaagttctttcggtattgaggaatgacgttaaatacagaagaagcaccggctaactccgtgccagcagccgcggtaatacggagggtgcgagcgtta…
Hafnia_alvei	1453496	Hafnia_alvei_FB1;_CP009706	gacgggtgagtaatgtctgggaaactgcctgatggagggggataactactggaaacggtagctaataccgcatgatttcggaccaaagtggcgccatcagatgtgcccagatgggattagctagtaggtggggtaatggctcacctaggcgacgatctctagctggtctgagaggatgaccagccacactggaactgagacacggtccagactcctacgggaggcagcagtggggaatattgcacaatgggcgcaagcctgatgcagccatgccgcgtgtatgaagaaggccttcgggttgtaaagtactttcagcgaggaggaatgacgttactcgcagaagaagcaccggctaactccgtgccagcagccgcggtaatacggagggtgcaagcgtta…
Hafnia_paralvei	546367	Hafnia_paralvei_strain_ATCC_29927_16S_ribosomal_RNA,_partial_sequence	gacgggtgagtaatgtctgggaaactgcctgatggagggggataactactggaaacggtagctaataccgcatgacttcggaccaaagtggcgccatcagatgtgcccagatgggattagctagtaggtggggtaatggctcacctaggcgacgatctctagctggtctgagaggatgaccagccacactggaactgagacacggtccagactcctacgggaggcagcagtggggaatattgcacaatgggcgcaagcctgatgcagccatgccgcgtgtatgaagaaggccttcgggttgtaaagtactttcagcgaggaggaatgacgttactcgcagaagaagcaccggctaactccgtgccagcagccgcggtaatacggagggtgcaagcgtta…
Janthinobacterium_sp.	1644131	Janthinobacterium_sp._1_2014MBL_MicDiv_chromosome,_complete_genome_16S	-------------------------------------------------------------------------------------------------------------------attagctagttggtagggtaaaagcctaccaaggcatcgatcagtagctggtctgagaggacgaccagccacactggaactgagacacggtccagactcctacgggaggcagcagtggggaattttggacaatgggcgaaagcctgatccagcaatgccgcgtgagtgaagaaggccttcgggttgtaaagctcttttgtcagggaagaatgacggtacctgaagaataagcaccggctaactacgtgccagcagccgcggtaatacgtagggtgcaagcgtta…
Klebsiella_aerogenes	548	Klebsiella_aerogenes_strain_JCM_1235_16S_ribosomal_RNA,_partial_sequence	gacgggtgagtaatgtctgggaaactgcctgatggagggggataactactggaaacggtagctaataccgcataacgcaagaccaaagtggtgccatcagatgtgcccagatgggattagctagtaggtggggtaatggctcacctaggcgacgatccctagctggtctgagaggatgaccagccacactggaactgagacacggtccagactcctacgggaggcagcagtggggaatattgcacaatgggcgcaagcctgatgcagccatgccgcgtgtatgaagaaggccttcgggttgtaaagtactttcagcgaggaggaatgacgttactcgcagaagaagcaccggctaactccgtgccagcagccgcggtaatacggagggtgcaagcgtta…
Klebsiella_grimontii	2058152	Klebsiella_grimontii_strain_SB73_16S_ribosomal_RNA,_partial_sequence	gacgggtgagtaatgtctgggaaactgcctgatggagggggataactactggaaacggtagctaataccgcataacgcaagaccaaagaggtgccatcagatgtgcccagatgggattagctagtaggtggggtaacggctcacctaggcgacgatccctagctggtctgagaggatgaccagccacactggaactgagacacggtccagactcctacgggaggcagcagtggggaatattgcacaatgggcgcaagcctgatgcagccatgccgcgtgtatgaagaaggccttcgggttgtaaagtactttcagcggggaggaatgacgttacccgcagaagaagcaccggctaactccgtgccagcagccgcggtaatacggagggtgcaagcgtta…
Klebsiella_huaxiensis	2153354	Klebsiella_huaxiensis_strain_WCHKl090001_16S_ribosomal_RNA,_partial_sequence	------------------------------------------------------------------------------------------------------------------------------------------------------------------------------------------------------------------------------------------------------------------------------------------------------------------------------------atgacgttactcgcagaagaagcaccggctaactccgtgccagcagccgcggtaatacggagggtgcaagcgtta…
Klebsiella_michiganensis	1134687	Klebsiella_michiganensis_strain_W14_16S_ribosomal_RNA,_partial_sequence	gacgggtgagtaatgtctgggaaactgcctgatggagggggataactactggaaacgrtagctaataccgcataacgcaagaccaaagaggtgccatcagatgtgcccagatgggattagctagtaggtggggtaacggctcacctaggcgacgatccctagctggtctgagaggatgaccagccacactggaactgagacacggtccagactcctacgggaggcagcagtggggaatattgcacaatgggcgcaagcctgatgcagccatgccgcgtgtatgaagaaggccttcgggttgtaaagtactttcagcggggaggaatgacgttacccgcagaagaagcaccggctaactccgtgccagcagccgcggtaatacggagggtgcaagcgtta…
Klebsiella_oxytoca	571	Klebsiella_oxytoca_strain_ATCC_13182_16S_ribosomal_RNA,_partial_sequence	gacgggtgagtaatgtctgggaaactgcccgatggagggggataactactggaaacggtagctaataccgcataacgcaagaccaaagaggtgccatcggatgtgcccagatgggattagcttgtaggtgaggtaacggctcacctaggcgacgatccctagctggtctgagaggatgaccagccacactggaactgagacacggtccagactcctacgggaggcagcagtggggaatattgcacaatgggcgcaagcctgatgcagccatgccgcgtgtatgaagaaggccttcgggttgtaaagtactttcagcggggaggaatgacgttacccgcagaagaagcaccggctaactccgtgccagcagccgcggtaatacggagggtgcaagcgtta…
Klebsiella_pneumoniae	573	Klebsiella_pneumoniae_strain_DSM_30104_16S_ribosomal_RNA,_partial_sequence	gacgggtgagtaatgtctgggaaactgcctgatggagggggataactactggaaacggtagctaataccgcataacgcaagaccaaagtggtgccatcagatgtgcccagatgggattagctagtaggtggggtaacggctcacctaggcgacgatccctagctggtctgagaggatgaccagccacactggaactgagacacggtccagactcctacgggaggcagcagtggggaatattgcacaatgggcgcaagcctgatgcagccatgccgcgtgtgtgaagaaggccttcgggttgtaaagcactttcagcggggaggaatgacgttacccgcagaagaagcaccggctaactccgtgccagcagccgcggtaatacggagggtgcaagcgtta…
Klebsiella_quasipneumoniae	1463165	Klebsiella_quasipneumoniae_(T);_type_strain:_07A044;_SB30;_HG933295	gacgggtgagtaatgtctgggaaactgcctgatggagggggataactactggaaacggtagctaataccgcataaygcaagaccaaagtggtgccatcagatgtgcccagatgggattagctagtaggtggggtaacggctcacctaggcgacgatccctagctggtctgagaggatgaccagccacactggaactgagacacggtccagactcctacgggaggcagcagtggggaatattgcacaatgggcgcaagcctgatgcagccatgccgcgtgtatgaagaaggccttcgggttgtaaagyactttcagcggggaggaatgacgttacccgcagaagaagcaccggctaactccgtgccagcagccgcggtaatacggagggtgcaagcgtta…
Klebsiella_sp.	2488567	Klebsiella_sp._FDAARGOS_511_chromosome,_complete_genome_16S	-------------------------------------------------------------------------------------------------------------------attagctagtaggtggggtaacggctcacctaggcgacgatccctagctggtctgagaggatgaccagccacactggaactgagacacggtccagactcctacgggaggcagcagtggggaatattgcacaatgggcgcaagcctgatgcagccatgccgcgtgtatgaagaaggccttcgggttgtaaagtactttcagcggggaggaatgacgttacccgcagaagaagcaccggctaactccgtgccagcagccgcggtaatacggagggtgcaagcgtta…
Klebsiella_variicola	244366	Klebsiella_variicola_strain_F2R9_16S_ribosomal_RNA,_partial_sequence	gacgggtgagtaatgtctgggaaactgcctgatggagggggataactactggaaacggtagctaataccgcataacgcaagaccaaagtggtgccatcagatgtgcccagatgggattagctggtaggtggggtaacggctcacctaggcgacgatccctagctggtctgagaggatgaccagccacactggaactgagacacggtccagactcctacgggaggcagcagtggggaatattgcacaatgggcgcaagcctgatgcagccatgccgcgtgtgtgaagaaggccttcgggttgtaaagcactttcagcggggaggaatgacgttacccgcagaagaagcaccggctaactccgtgccagcagccgcggtaatacggagggtgcaagcgtta…
Kluyvera_intermedia	61648	Kluyvera_intermedia_strain_256_16S_ribosomal_RNA,_partial_sequence	gacgggtgagtaatgtctgggaaactgcccgatggagggggataactactggaaacggtagctaataccgcataacgcaagaccaaagtggcaccatcggatgtgcccagatgggattagctagtaggtggggtaatggctcacctaggcgacgatccctagctggtctgagaggatgaccagccacactggaactgagacacggtccagactcctacgggaggcagcagtggggaatattgcacaatgggcgcaagcctgatgcagccatgccgcgtgtatgaagaaggccttcgggttgtaaagtactttcagcgaggaggaatgacgttactcgcagaagaagcaccggctaactccgtgccagcagccgcggtaatacggagggtgcaagcgtta…
Kosakonia_cowanii	208223	Kosakonia_cowanii_(T);_type_strain:_CIP_107300;_AJ508303	gacgggtgagtaatgtctgggaaactgcctgatggagggggataactactggaaacggtagctaataccgcataacgcaagaccaaagaggtgccatcagatgtgcccagatgggattagctagtaggtggggtaacggctcacctaggcgacgatccctagctggtctgagaggatgaccagccacactggaactgagacacggtccagactcctacgggaggcagcagtggggaatattgcacaatgggcgcaagcctgatgcagccatgccgcgtgtatgaagaaggccttcgggttgtaaagtactttcagcggggaggaatgacgttacccgcagaagaagcaccggctaactccgtgccagcagccgcggtaatacggagggtgcaagcgtta…
Kurthia_sp.	1750719	Kurthia_gibsonii;_11KRI321;_KJ722472	gacgggtgagtaacacgtggcaacctgccctacagatcgggataactcagggaaacctgggctaataccggataattgaagttgaaaggcgcactgtaggatgggcccgcggtgcattagctagttggtggggtaacggcctaccaaggcaacgatgcatagccgacctgagagggtgatcggccacattgggactgagacacggcccaaactcctacgggaggcagcagtagggaatcttccacaatggacgaaagtctgatggagcaacgccgcgtgagtgatgaaggttttcggatcgtaaaactctgttgtaagggaagagggacggtaccttattagaaagccacggctaactacgtgccagcagccgcggtaatacgtaggtggcaagcgttg…
Kurthia_zopfii	1650	Kurthia_zopfii_strain_NBRC_101529_16S_ribosomal_RNA,_partial_sequence	gacgggtgagtaacacgtggcaacctgccctacagtttgggataactccgggaaaccggggctaataccgaataattgaagttgaaaggcgcgctgtaggatgggcccgcggtgcattagctagttggtggggtaatggcctaccaaggcaacgatgcatagccgacctgagagggtgatcggccacattgggactgagacacggcccaaactcctacgggaggcagcagtagggaatcttccacaatggacgaaagtctgatggagcaacgccgcgtgagtgatgaaggttttcggatcgtaaaactctgttgtaagggaagagggacggtaccttattagaaagccacggctaactacgtgccagcagccgcggtaatacgtaggtggcaagcgttg…
Lachnoanaerobaculum_umeaense	617123	Lachnoanaerobaculum_umeaense_strain_CD3:_22_16S_ribosomal_RNA,_partial_sequence	gacgggtgagtaacgcgtgataacctgccttatacagggggataacggagagaaatttccgctaagaccgcataagcaggggtaaaatattaggtataagatggatccgcgtccgattagctagttggtgaggtagaggctcaccaaggcgacgatcggtagccggcctgagagggtgaacggccacattgggactgagacacggcccaaactcctacgggaggcagcagtggggaatattggacaatggggggaaccctgatccagcgacgccgcgtgagtgaagaagtatttcggtatgtaaagctctatcagcagggaagaatgacggtacctgactaagaagccccggctaactacgtgccagcagccgcggtaatacgtagggggcaagcgtta…
Lachnoclostridium_sp.	1834196	Lachnoclostridium_sp._YL32,_complete_genome_16S	-------------------------------------------------------------------------------------------------------------------attagccagttggcggggtaacggcccaccaaagcgacgatcagtagccggcctgagagggtgaccggccacattgggactgagacacggcccaaactcctacgggaggcagcagtggggaatattgcacaatgggcgaaagcctgatgcagcgacgccgcgtgagtgaagaagtatttcggtatgtaaagctctatcagcagggaagaatgacggtacctgactaagaagccccggctaactacgtgccagcagccgcggtaatacgtagggggcaagcgtta…
Lachnospiraceae_bacterium	2109691	uncultured_Lachnospiraceae_bacterium;_dgD-107;_AB264072	gacgggtgagtaacgcgtggtaacctgccttatacagggggatagcagttggaaacgactgataataccgcataagcagtgtgaaaaactctggtataagatggacccgcgtctgattagttagttggtggggtaacggcctaccaagaccgcgatcagtagccgacctgagagggtgaccggccacattgggactgagacacggcccagactcctacgggaggcagcagtggggaatattgcacaatggaggaaactctgatgcagcgacgccgcgtgagcgaagaagtatttcggtatgtaaagctctatcagcagggaagagtgacggtacctgactaagaagcaccggctaaatacgtgccagcagccgcggtaatacgtatggtgcaagcgtta…
Lactobacillus_buchneri	1071400	Lactobacillus_buchneri_CD034;_CP003043	aactggtgagtaacacgtggtaacctgccctgaagtaggggataacacttggaaacaggtgctaataccgtataacttggtttaaaagacgcactttaggatggacccgcggcgtattagcttgttggtaaggtaacggcctaccaaggcgatgatacgtagccgacctgagagggtaatcggccacattgggactgagacacggcccaaactcctacgggaggcagcagtagggaatcttccacaatggacgaaagtctgatggagcaacgccgcgtgagtgatgaagggtttcggctcgtaaaactctgttgttggagaagagtgacggtatccaaccagaaagccacggctaactacgtgccagcagccgcggtaatacgtaggtggcaagcgttg…
Lactobacillus_nagelii	82688	Lactobacillus_nagelii_strain_NRIC_559_16S_ribosomal_RNA,_partial_sequence	aacgggtgagtaacacgtggtaacctgccccaaagcgggggataacatttggaaacagatgctaataccgcataactctgtgtcaaagatgcactttgggatggacccgcggcgtattagctagttggtaaggtaatggcttaccaaggcaatgatacgtagccgaactgagaggttgatcggccacattgggactgagacacggcccaaactcctacgggaggcagcagtagggaatcttccacaatggacgaaagtctgatggagcaacgccccgtgagtgaagaaggttttcggatcgtaaaactctgttgtcagagaagagtgacggtatctggccagaaagccacggctaactacgtgccagcagccgcggtaatacgtaggtggcaagcgttg…
Lactobacillus_reuteri	1598	Lactobacillus_reuteri_strain_F275_16S_ribosomal_RNA,_partial_sequence	gacgggtgagtaacacgtggtaacctgccccggagcggggaataacatttggaaacagatgctaataccgcataacttttctggaaagatgcactctgggatggacctgcggtgcattagctagttggtaaggtaacggcttaccaaggcgatgatgcatagccgagttgagagactgatcggccacaatgggactgagacacggtccaaacttctacgggaggcagcagtagggaatcttccacaatgggcgcaag-ctgatggagcaacaccgcgttattaagaaagggtttcggccgcttaaactctgttgttggagaagagtgacggtatccaaccagaaagtcacggctaactacgtgccagcagccgcggtaatacgtaggtggcaagcgtta…
Lactococcus_lactis	1358	Lactococcus_lactis_strain_NCDO_604_16S_ribosomal_RNA_gene,_partial_sequence	aacgggtgagtaacgcgtgggaatctgcctttgagcgggggacaacatttggaaacgaatgctaataccgcataaataagtttgaaagatgcactcaaagatgatcccgcgttgtattagctagttggtgaggtaaaggctcaccaaggcgatgatacatagccgacctgagagggtgatcggccacattgggactgagacacggcccaaactcctacgggaggcagcagtagggaatcttcggcaatggacgaaagtctgaccgagcaacgccgcgtgagtgaagaaggttttcggatcgtaaaactctgttggtagagaagagtgacggtaactacccagaaagggacggctaactacgtgccagcagccgcggtaatacgtaggtcccgagcgttg…
Lautropia_mirabilis	47671	Lautropia_mirabilis_strain_SSI_AB_2188_16S_ribosomal_RNA,_partial_sequence	aacgggtgagtaatacatcggaacgtgcccagtagtgggggatagctcggcgaaagccggattaataccgcatacgtgagggtgaaagcggcgctattggagcggccgatggcagattagctagttggtggggtaaaggcctaccaaggcgacgatctgtagctggtctgagaggacgaccagccacactgggactgagacacggcccagactcctacgggaggcagcagtggggaattttggacaatgggcgaaagcctgatccagcaatgccgcgtgtgtgatgaaggccttcgggttgtaaagcacttttggcgggaacgaatgacggtacccgcagaataagcaccggctaactacgtgccagcagccgcggtaatacgtagggtgcaagcgtta…
Leclercia_adecarboxylata	83655	Leclercia_adecarboxylata_strain_CIP_82.92_16S_ribosomal_RNA,_partial_sequence	gacgggtgagtaatgtctgggaaactgcctgatggagggggataactactggaaacggtagctaataccgcataacgcaagaccaaagaggtgccatcagatgtgcccagatgggattagctagtaggtggggtaatggctcacctaggcgacgatccctagctggtctgagaggatgaccagccacactggaactgagacacggtccagactcctacgggaggcagcagtggggaatattgcacaatgggcgcaagcctgatgcagccatgccgcgtgtatgaagaaggccttcgggttgtaaagtactttcagcggggaggaatgacgttacccgcagaagaagcaccggctaactccgtgccagcagccgcggtaatacggagggtgcaagcgtta…
Leclercia_sp.	1920114	Leclercia_sp._S2;_EU251040	gatgggtgagtaatgtctgggaaactgcctgatggagggggataactactggaaacggtagctaataccgcataacgcaagaccaaagaggtgccatcagatgtgcccagatgggattagctagtaggtggggtaatggctcacctaggcgacgatccctagctggtctgagaggatgaccagccacactggaactgagacacggtccagactcctacgggaggcagcagtggggaatattgcacaatgggcgcaagcctgatgcagccatgccgcgtgtatgaagaaggccttcgggttgtaaagtactttcagcggggaggaatgacgttacccgcagaagaagcaccggctaactccgtgccagcagccgcggtaatacggagggtgcaagcgtta…
Lelliottia_amnigena	61646	Lelliottia_amnigena_strain_JCM1237_16S_ribosomal_RNA,_partial_sequence	gacgggtgagtaatgtctgggaaactgcctgatggagggggataactactggaaacggtagctaataccgcataangcaagaccaaagaggtgccatcagatgtgcccagatgggattagctagtaggtggggtaatggctcacctaggcgacgatccctagctggtctgagaggatgaccagccacactggaactgagacacggtccagactcctacgggaggcagcagtggggaatattgcacaatgggcgcaagcctgatgcagccatgccgcgtgtatgaagaaggccttcgggttgtaaagtactttcagcgaggaggaatgacgttactcgcagaagaagcaccggctaactccgtgccagcagccgcggtaatacggagggtgcaagcgtta…
Lelliottia_sp.	2153385	Lelliottia_sp._UYFA298;_KP704437	gacgggtgagtaatgtctgggaaactgcctgatggagggggataactactggaaacggtagctaataccgcataacgcaagaccaaagaggtgccatcagatgtgcccagatgggattagctagtaggtggggtaatggctcacctaggcgacgatccctagctggtctgagaggatgaccagccacactgggattgagacacgtcccagactcctacgggaggcagcagtggggaatattgcacaatggggccaagcctgatgcagccatgccgcgtgtatgaaagaagctttcgggttgtaaagtactttcagcggaggaggatgacgttactcgcagaagaagcaccggctaactccgtgccagcagccgcggtaatacggagggtgcaagcgtta…
Leptotrichia_buccalis	523794	Leptotrichia_buccalis_C-1013-b_strain_DSM_1135_16S_ribosomal_RNA,_partial_sequence	gacgggtgagtaacgcgtaagaacttgccctgcagacagggataacagacggaaacgactgataatacctgatatacggcaatgaaaagtgtgctgcaggagagctttgcgtcctattagcttgttggtgaggtaatggctcaccaaggcgatgataggtagccggcctgagagggtgaacggccacaaggggactgagatacggcccttactcctacgggaggcagcagtggggaatattggacaatgggggcaaccctgatccagcaattctgtgtgcacgaagaaggttttcggattgtaaagtgctttcagcagggaagagtgacggtacctgcagaagaagcgacggctaaatacgtgccagcagccgcggtaatacgtatgtcgcaagcgtta…
Leptotrichia_hofstadii	157688	Leptotrichia_hofstadii_strain_LB23_16S_ribosomal_RNA,_partial_sequence	gacgggtgagtaacgcgtaagaacttgccctgcagacagggataacagacggaaacgactgacaacacctgatacacggcaatgaaaagagtgctgcgggagagctttgcgtcctattagcttgttggcggggtaacggcccaccaaggcgatgataggtagccggcctgagagggtgaacggccacaaggggactgagatacggcccttactcctacgggaggcagcagtggggaatattggacaatgggggcaaccctgatccagcaattctgtgtgcacgaggaaggttttcggattgtaaagtgctttcagcagggaagagtgacggtacctgcagaagaagcgacggctaaatacgtgccagcagccgcggtaatacgtatgtcgcaagcgtta…
Leptotrichia_hongkongensis	554406	Leptotrichia_hongkongensis_strain_HKU24_16S_ribosomal_RNA,_partial_sequence	gacgggtgagtaacgcgtaggaacttgccctgcagacagggataacagacggaaacgactgataacacctggtattgcctgatgaaaggagcgctgcaggagagccttgcgtcctattagctagttggtggggtaacggcccaccaaggcgatgataggtagccggcctgagagggtgaacggccacaaggggactgagatacggcccttactcctacgggaggcagcagtggggaatattggacaatgggggcaaccctgatccagcaattctgtgtgcacgaagaaggttttcggattgtaaagtgctttcagcagggaagagtgacggtacctgcagaagaagcgacggctaaatacgtgccagcagccgcggtaatacgtatgtcgcaagcgtta…
Leptotrichia_shahii	157691	Leptotrichia_shahii_strain_LB37_16S_ribosomal_RNA,_partial_sequence	gacgggtgagtaacgcgtaggaacttgccctgcagacagggataacagacggaaacgactgacaagacctgatacatggcgatgaaaggagcgctgcaggagagccttgcgtcctattagcttgttggcggggtaatggcccaccaaggcgatgataggtagccggcctgagagggtggacggccacaaggggactgagatacggcccttactcctacgggaggcagcagtggggaatattggacaatgggggcaaccctgatccagcaattctgtgtgcacgaagaaggttttcggattgtaaagtgctttcagcagggaagagtgacggtacctgcagaagaagcgacggctaaatacgtgccagcagccgcggtaatacgtatgtcgcgagcgtta…
Leptotrichia_sp.	712357	Leptotrichia_sp._oral_taxon_212;_W10393;_CP012410	gacgggtgagtaacgcgtagggacttacctgcaggactgggataacagggggaaactcctgacaagaccggataatttatgatgaaaggagcgcctgcggagagccttgcgtcctattagctagttggtgaggtaagggctcaccaaggcgaagataggtagccggcctgagagggtggacggccacaaggggactgagatacggcccttactcctacgggaggcagcagtggggaatattggacaatgggggcaaccctgatccagcaattctgtgtgcacgaagaaggttttcggattgtaaagtgctttcagcagggaagagtgacggtacctgcagaagaagcgacggctaaatacgtgccagcagccgcggtaatacgtatgtcgcgagcgtta…
Leptotrichia_trevisanii	109328	Leptotrichia_trevisanii_strain_'WeeTee'_1999_16S_ribosomal_RNA,_partial_sequence	gacgggtgagtaacgcgtaggaacttgccccgcagacagggataacagacggaaacgactgataaracctggtgttggctgatgaaaggagcgctgcgggagagccttgcgtcctattagcttgttggtgaggtaacggcccaccaaggcgatgataggtagccggcctgagagggtgaacggccacaaggggactgagatacggcccttactcctacgggaggcagcagtggggaatattggacaatgggggcaaccctgatccagcaattctgtgtgcacgaagaaggttttcggattgtaaagtgctttcagcagggaagagtgacggtacctgcagaagaagcgacggctaaatacgtgccagcagccgcggtaatacgtatgtcgcaagcgtta…
Leptotrichia_wadei	157687	Leptotrichia_wadei_strain_LB16_16S_ribosomal_RNA,_partial_sequence	gacgggtgagtaacgcgtagggacttgccctgcagtcagggataacagacggaaacgactgataaaacctgataaagcctgatgaaaaggatgctgcaggagagccttgcgtcctattagcttgttggtggggtaacggcccaccaaggcgatgataggtagccggcctgagagggtggacggccacaaggggactgagatacggcccttactcctacgggaggcagcagtggggaatattggccaatgggggcaacccttatccagcaattctgtgtgcacgatgaaggtcttcggattgtaaagtgctttcagcagggaagaatgacggtacctgcagaagaagcgacggctaaatacgtgccagcagccgcggtaatacgtatgtcgcgagcgtta…
Leuconostoc_mesenteroides	33967	Leuconostoc_mesenteroides_subsp._mesenteroides;_IMAU40039;_QH38-5;_FJ749315	aacgggtgagtaacacgtgacaacctgcctcaaggctggggataacatttggaaacagatgctaataccgaataaacaaagttaaaaggcgcacctagagatggatccgcggtgcattagttagttggtggggtaaaggcctaccaagacaatgatgcatagccgagttgagagactgatcggccacattgggactgagacacggcccaaactcctacgggaggctgcagtagggaatcttccacaatgggcgaaagcctgatggagcaacgccgcgtgtgtgatgaaggctttcgggtcgtaaagcactgttgtatgggaagagggacggtaccataccagaaagggacggctaaatacgtgccagcagccgcggtaatacgtatgtcccgagcgtta…
Listeria_monocytogenes	1639	Listeria_monocytogenes_strain_NCTC_10357_16S_ribosomal_RNA,_partial_sequence	gacgggtgagtaacacgtggcaacctgcctgtaagttggggataactccgggaaaccggggctaataccgaatgatcgcttttgaaagatgcgcttacagatgggcccgcggtgcattagctagttggtagggtaatggcctaccaaggcaacgatgcatagccgacctgagagggtgatcggccacactgggactgagacacggcccagactcctacgggaggcagcagtagggaatcttccgcaatggacgaaagtctgacggagcaacgccgcgtgtatgaagaaggttttcggatcgtaaagtactgttgttagagaagagtgacggtatctaaccagaaagccacggctaactacgtgccagcagccgcggtaatacgtaggtggcnagcgtng…
Lysinibacillus_sp.	2169540	Lysinibacillus_sp._MH33;_EU182861	gacgggtgagtaacacgtggcaacctaccttatagtttgggataactccgggaaaccggggctaataccgaataataaacactgaaagacgcgctataggatgggcccgcggcgcattagctagttggtgaggtaacggctcaccaaggcgacgatgcgtagccgacctgagagggtgatcggccacactgggactgagacacggcccagactcctacgggaggcagcagtagggaatcttccacaatgggcgaaagcctgatggagcaacgccgcgtgagtgaagaaggatttcggttcgtaaaactctgttgtaagggaagagtgacggtaccttattagaaagccacggctaactacgtgccagcagccgcggtaatacgtaggtggcaagcgttg…
Lysinibacillus_sphaericus	1421	Lysinibacillus_sphaericus_strain_DSM_28_16S_ribosomal_RNA,_partial_sequence	gacgggtgagtaacacgtggcaacctaccctatagtttgggataactccgggaaaccggggctaataccgaataatcaatactgaaagacgcgctataggatgggcccgcggcgcattagctagttggtgaggtaacggctcaccaaggcaacgatgcgtagccgacctgagagggtgatcggccacactgggactgagacacggcccagactcctacgggaggcagcagtagggaatcttccacaatgggcgaaagcctgatggagcaacgccgcgtgagtgaagaaggatttcggttcgtaaaactctgttgtaagggaagagtgacggtaccttattagaaagccacggctaactacgtgccagcagccgcggtaatacgtaggtggcaagcgttg…
Macrococcus_canis	1855823	Macrococcus_canis_strain_KM_45013_16S_ribosomal_RNA,_partial_sequence	gacgggtgagtaacacgtggtaacctacctataagactgggataacttcgggaaaccggagctaataccggataatcaatagtgaaagacgcacttatagatggacccgcggtgtattagctagttggtgaggtaacggctcaccaaggcaacgatacatagccgacctgagagggtgatcggccacactgggactgagacacggcccagactcctacgggaggcagcagtagggaatcttccgcaatggacgaaagtctgacggagcaacgccgcgtgagtgaagaaggttttcggatcgtaaaactctgttgtaagggaagagtgacggtaccttaccagaaagccacggctaactacgtgccagcagccgcggtaatacgtaggtggcaagcgtta…
Massilia_oculi	945844	Massilia_oculi_strain_CCUG_43427A_16S_ribosomal_RNA,_partial_sequence	aacgggtgagtaatatatcggaacgtacccagaagtgggggataacgtagcgaaagttacgctaataccgcatacgcacggatgaaagtagtgcttttggagcggccgatatctgattagctagttggtagggtaaaggcctaccaaggcgacgatcagtagctggtctgagaggacgaccagccacactggaactgagacacggtccagactcctacgggaggcagcagtggggaattttggacaatgggcgcaagcctgatccagcaatgccgcgtgagtgaagaaggccttcgggttgtaaagctcttttgtcagggaagaatgacggtacctgaagaataagcaccggctaactacgtgccagcagccgcggtaatacgtagggtgcaagcgtta…
Megasphaera_stantonii	2144175	Megasphaera_stantonii_strain_AJH120_chromosome,_complete_genome_16S	--------------------------------------------------------------------------------------------------ggaggggcttgcgtctgattagctagttggaggggtaacggcccaccaaggcgacgatcagtagccggtctgagaggatgaacggccacattggaactgagacacggtccagactcctacgggaggcagcagtggggaatcttccgcaatgggcgaaagcctgacggagcaacgccgcgtgagcgaagacggccttcgggttgtaaagctctgttatacgggacgaatgacggtaccgtaagagaaagccacggctaactacgtgccagcagccgcggtaatacgtaggtggcaagcgttg…
Methylomonas_methanica	857087	Methylomonas_methanica_MC09;_CP002738	gacgggtgagtaatgcataggaatctgcctattagtgggggataacgtggggaaactcacgctaataccgcatacgtacgggtgaaagctgcgctaatagatgagcctatgttggattagctagttggtagggtaatggcctaccaaggcgacgatccatagctggtctgagaggatgatcagccacactgggactgagacacggcccagactcctacgggaggcagcagtggggaatattggacaatgggcgaaagcctgatccagcaataccgcgtgtgtgaagaaggcctgagggttgtaaagcactttcaataggaaggaatgacattacctatacaagaagcaccggctaactccgtgccagcagccgcggtaatacggagggtgcaagcgtta…
Microbacterium_foliorum	104336	Microbacterium_foliorum_strain_P_333/02_16S_ribosomal_RNA,_partial_sequence	aacgggtgagtaacacgtagcaacctgcccctgactctgggataagcgctggaaacggcgtctaatactggatacggttactggaaagatttggttggggatgggctcgcggcctatcagcttgttggtgaggtaatggctcaccaaggcgtcgacgggtagccggcctgagagggtgaccggccacactgggactgagacacggcccagactcctacgggaggcagcagtggggaatattgcacaatgggcggaagcctgatgcagcaacgccgcgtgagggatgacggccttcgggttgtaaacctcttttagcagggaagagtgacggtacctgcagaaaaagcaccggctaactacgtgccagcagccgcggtaatacgtagggtgcaagcgtta…
Microbacterium_lemovicicum	1072463	Microbacterium_lemovicicum_strain_ViU22_16S_ribosomal_RNA,_partial_sequence	aacgggtgagtaacacgtagcaacctgccccggactctgggataagcgctggaaacggcgtctaataccggatatggtggttggaaagatttggttcgggatgggctcgcggcctatcagcttgttggtgaggtaatggctcaccaaggcgtcgacgggtagccggcctgagagggtgaccggccacactgggactgagacacggcccagactcctacgggaggcagcagtggggaatattgcacaatgggcggaagcctgatgcagcaacgccgcgtgagggatgacggccttcgggttgtaaacctcttttagcaaggaagagtgacggtacttgcagaaaaagcgccggctaactacgtgccagcagccgcggtaatacgtagggcgcaagcgtta…
Microbacterium_oxydans	82380	Microbacterium_oxydans_strain_DSM_20578_16S_ribosomal_RNA,_partial_sequence	aacgggtgagtaacacgtagcaacctgcccctgactctgggataagcgctggaaacggcgtctaatactggatatggcgtctggaaagaatcggttggggatgggctcgcggcctatcagcttgttggtgaggtaatggctcaccaaggcgtcgacgggtagccggcctgagagggtgaccggccacactgggactgagacacggcccagactcctacgggaggcagcagtggggaatattgcacaatgggcgcaagcctgatgcagcaacgccgcgtgagggacgacggccttcgggttgtaaacctcttttagcagggaagagtgacggtacctgcagaaaaagcgccggctaactacgtgccagcagccgcggtaatacgtagggcgcaagcgtta…
Microbacterium_sp.	2606451	Microbacterium_sp._VKM_Ac-2011;_AB042076	aacgggtgagtaacacgtagcaacctgcccctgactctgggataagcgctggaaacggcgtctaatactggatttggcgtctggaaagaatcggttggggatgggctcgcggcctatcagcttgttggtgaggtaatggctcaccaaggcntcgacgggtagccggcctgagagggtgaccggccacactgggactgagacacggcccagactcctacgggaggcagcagtggggaatattgcacaatgggcgcaagcctgatgcagcaacgccgcgtgagggacgacggccttcgggttgtaaacctcttttagcagggaagagtgacggtacctgcagaaaaagcgccggctaactacgtgccagcagccgcggtaatacgtagggcgcaagcgtta…
Micromonospora_echinospora	1877	Micromonospora_echinospora_strain_DSM_43816_16S_ribosomal_RNA,_partial_sequence	aacgggtgagtaacacgtagcaacctgccctaggctttgggataaccccgggaaaccgggcctaataccgaatagggttggtggaaagtttcggcctgggatgggctcgcggcctatcagcttgttggtggggtgatggcctaccaagccgacgacgggtagccggcctgagagggcgaccggccacactgggactgagacacggcccagactcctacgggaggcagcagtggggaatattgcacaatgggcggaagcctgatgcagcgacgccgcgtgagggatgacggccttcgggttgtaaacctctttcagcagggacgagtgacggtacctgcagaagaagcgccagccaactacgtgccagcagccgcggtaagacgtagggcgcgagcgttg…
Mogibacterium_diversum	114527	Mogibacterium_diversum_strain_HM-7_16S_ribosomal_RNA,_partial_sequence	gacgggtgagtaacgcgtggcaacctgcccctgacagagggatagccattggaaacgatgattaaaaccacatgaccatcggtcaaagattcggtcagggatgggcctgcgtctgattaactagttggtgaggtaacggctcaccaaggtgacgatcagtagccgacctgagagggtgatcggccacattggaactgagacacggtccaaacttctacggaaggcagcagtagggaatcttgcacaatgggcgaaagcctgatgcagcaacgccgcgtgaaggatgaaggccttcgggttgtaaacttctgttctaagggaagaatgacggtaccttaggagcaagccccggctaactacgtgccagcagccgcggtaatacgtagggggcaagcgtta…
Mogibacterium_pumilum	86332	Mogibacterium_pumilum_strain_D2-18_16S_ribosomal_RNA,_partial_sequence	gacgggtgagtaacgcgtggcaacctgcccttgacagagggatagccattggaaacgatgattaaaacctcataaccaacggtcaaagattcggtcagggatgggcctgcgtctgattaactagttggtgaggtaacggctcaccaaggtgacgatcagtagccgacctgagagggtgatcggccacattggaactgagacacggtccaaacttctacggaaggcagcagtagggaatcttgcacaat-ggcgaaagcctgatgcagcaacgccgcgtgaaggatgaagg-cttcgggttgtaaacttctgttctaagggaagaatgacggtaccttaggagcaagccccggctaactacgtgccagcagccgcggtaatacgtagggggcaagcgtta…
Moraxella_osloensis	34062	Moraxella_osloensis_strain_A1920_16S_ribosomal_RNA,_partial_sequence	gacgggtgagtaacatttaggaatctacctagtagtgggggatagctcggggaaactcgaattaataccgcatacgtacgggtgaaaggggtgctattagatgagcctaaatcagattagctagttggtggggtaaaggcccaccaaggcgacgatctgtaactggtctgagaggatgatcagtcacaccggaactgagacacggtccggactcctacgggaggcagcagtggggaatattggacaatgggggcaaccctgatccagccatgccgcgtgtgtgaagaaggccttttggttgtaaagcactttaagcagggaggaatgacgttacctgcagaataagcaccggctaactctgtgccagcagccgcggtaatacagagggtgcgagcgtta…
Muribaculum_sp.	2530390	Muribaculum_gordoncarteri_16S_ribosomal_RNA_gene,_partial_sequence	cacgggtgagtaacgcgttgcgacctgcccgttgcagggggataatcgggagaaatcccgtctaataccgcgtaattg-cggccaaaggaacggcaacggatgggcatgcgtgacattagctagttggcggggcaacggcccaccaaggcgacgatgtctaggggttctgagaggaaggtcccccacactggtactgagacacggaccagactcctacgggaggcagcagtgaggaatattggtcaatgggcgcgagcctgaaccagccaagtcgcgtgagggatgacggcctacgggttgtaaacctcttttgtcggggagcatcgagagtacccgaagaaaaagcatcggctaactccgtgccagcagccgcggtaatacggaggatgcgagcgtta…
Mycoplasma_mycoides	40477	Mycoplasma_mycoides_subsp._capri_strain_PG3_16S_ribosomal_RNA,_partial_sequence	aacgggtgagtaacacgttctaacctacctcatagcgggggataacttttggaaacgaaagataataccgcatgtaaaagatcaaaagaaccactatgagatggggatgcggcgtattagctagtaggtgagataatagcccacctaggcgatgatacgtagccgaactgagaggttgatcggccacattgggactgagatacggcccagactcctacgggaggcagcagtagggaatttttcacaatggacgaaagtctgatgaagcaatgccgcgtgagtgatgacggccttcgggttgtaaagctctgttgtaagggaagaatgacagtaccttaccagaaagccacggctaactatgtgccagcagccgcggtaatacataggtggcaagcgtta…
Myroides_odoratimimus	76832	Myroides_odoratimimus_strain_CCUG_39352_16S_ribosomal_RNA,_partial_sequence	cacgggtgagtaacgcgttgcaacctaccttatacaggggaatagcccgaagaaattcggattaatgctccatggtttgataataaagattcggtataagatgggcatgcgtatcattagctagttggtgtggtaacggcataccaaggcaacgatgattaggggtcctgagagggagatcccccacactggtactgagacacggaccagactcctacgggaggcagcagtgaggaatattggtcaatggaggcaactctgaaccagccatgccgcgtgcaggatgacggcctatggattgtaaactgcttttgtacaggaagattgacggtactgtaagaataaggatcggctaactccgtgccagcagccgcggtaatacggaggatccgagcgtta…
Neisseria_chenwenguii	1853278	Neisseria_chenwenguii_strain_10023_16S_ribosomal_RNA,_partial_sequence	aacgggtgagtaatgcatcggaacgtaccgagtagtgggggataactgtccgaaaggatggctaataccgcatacgtgagaaggaaagcggcgctattcgagcggccgatgtctgattagctggttggtggggtaaaggcctaccaaggcgacgatcagtagcgggtctgagaggatgatccgccacactgggactgagacacggcccagactcctacgggaggcagcagtggggaattttggacaatgggcgcaagcctgatccagccatgccgcgtgtctgaagaaggccttcgggttgtaaaggacttttgtcagggaagaatgacggtacctgaagaataagcaccggctaactacgtgccagcagccgcggtaatacgtagggtgcgagcgtta…
Neisseria_cinerea	483	Neisseria_cinerea_strain_ATCC_14685_16S_ribosomal_RNA,_partial_sequence	aacgggtgagtaacatatcggaacgtaccgagtagtgggggataactgatcgaaagatcagctaataccgcatacgtgagagggaaagcagcgctattcgagcggccgatatctgattagctagttggtggggtaaaggcctaccaaggcgacgatcagtagcgggtctgagaggatgatccgccacactgggactgagacacggcccagactcctacgggaggcagcagtggggaattttggacaatgggcgcaagcctgatccagccatgccgcgtgtctgaagaaggccttcgggttgtaaaggacttttgtcagggaagaatgacggtacctgaagaataagcaccggctaactacgtgccagcagccgcggtaatacgtagggtgcgagcgtta…
Neisseria_elongata	495	Neisseria_elongata;_I3;_AJ239302	aacgggtgagtaatatattggaacgtaccgagtaatgggggataaccaatcgaaagattggctaataccgcatatgtgaggaggaaagcagcgttattcgagcggccaatatctgattagctagttggtggggtaaaggcctaccaaggcgacgatcagtagcgggtctgagaggatgatccgccacactgggactgagacacggcccagactcctacgggaggcagcagtggggaattttggacaatgggcgcaagcctgatccagccatgccgcgtgtctgaagaaggccttcgggttgtaaaggacttttgttagggaagaatgacggtacctaaagaataagcaccggctaactacgtgccagcagccgcggtaatacgtagggtgcgagcgtta…
Neisseria_flavescens	484	Neisseria_flavescens_strain_N_155_16S_ribosomal_RNA,_partial_sequence	aacgggtgagtaatatatcggaacgtaccgagtaatgggggataactaatcgaaagattagctaataccgcatatttgaggaggaaagcagcgttattcgagcggccgatatctgattagttagttggtggggtaaaggcctaccaaggcgacgatcagtagcgggtctgagaggatgatccgccacactgggactgagacacggccnngnctcctacgggaggcagcagtggggaattttggacaatgggcgcaagcctnatccagccatgccgcgtgtctgaagaaggccttcgggttgtaaaggacttttgtcagggaagaatgacggtacctgaagaataagcaccggctaactacgtgccagcagccgcgnnnatacgtagggtgcnagcgtta…
Neisseria_gonorrhoeae	485	Neisseria_gonorrhoeae_strain_NCTC_8375_16S_ribosomal_RNA,_complete_sequence	aacgggtgagtaacatatcggaacgtaccgggtagcgggggataactgatcgaaagatcagctaataccgcatacgtgagagggaaagcagcgctatccgagcggccgatatctgattagctggttggcggggtaaaggcccaccaaggcgacgatcagtagcgggtctgagaggatgatccgccacactgggactgagacacggcccagactcctacgggaggcagcagtggggaattttggacaatgggcgcaagcctgatccagccatgccgcgtgtctgaagaaggccttcgggttgtaaaggacttttgtcagggaagaatgacggtacctgaagaataagcaccggctaactacgtgccagcagccgcggtaatacgtagggtgcgagcgtta…
Neisseria_lactamica	486	Neisseria_lactamica_strain_NCTC_10617_16S_ribosomal_RNA,_partial_sequence	aacgggtgagtaacatatcggaacgtaccgggcagtgggggataactgatcgaaagatcagctaataccgcatatttgaggaagaaagcagcgctatccgagcggccgatatctgattagctggttggcggggtaaaggcccaccaaggcgacgatcagtagcgggtctgagaggacgatccgccacactgggactgagacacggcccagactcctacgggaggcagcagtggggaattttggacaatgggcgcaagcctgatccagccatgccgcgtgtctgaagaaggccttcgggttgtaaaggacttttgtcggggaagaatgacggtacccgaagaataagcaccggctaactacgtgccagcagccgcggtaatacgtagggtgcgagcgtta…
Neisseria_meningitidis	487	Neisseria_meningitidis_strain_M1027_16S_ribosomal_RNA,_partial_sequence	aacgggtgagtaacatatcggaacgtaccgagtagtgggggataactgatcgaaagatcagctaataccgcatacgtgagagagaaagcagcgctattcgagcggccgatatctgattagctagttggtggggtaaaggcctaccaaggcgacgatcagtagcgggtctgagaggatgatccgccacactgggactgagacacggcccagactcctacgggaggcagcagtggggaattttggacaatgggcgcaagcctgatccagccatgccgcgtgtctgaagaaggccttcgggttgtaaaggacttttgtcagggaagaatgacggtacctgaagaataagcaccggctaactacgtgccagcagccgcggtaatacgtagggtgcgagcgtta…
Neisseria_mucosa	488	Neisseria_mucosa_strain_N16_16S_ribosomal_RNA,_partial_sequence	aacgggtgagtaacatatcggaacgtaccgagcagtgggggataactaatcgaaagattagctaataccgcatatatgaggaagaaagcagcgctgtttgagcggccgatatctgattagctagttggtggggtaaaggcctaccaaggcgacgatcagtagcgggtctgagaggatgatccgccacactgggactgagacacggcccagactcctacgggaggcagcagtggggaattttggacaatgggcgcaagcctgatccagccatgccgcgtgtctgaagaaggccttcgggttgtaaaggacttttgtcagggaagaatgacggtacctgaagaataagcaccggctaactacgtgccagcagccgcggtaatacgtagggtgcgagcgtta…
Neisseria_sp.	655307	Neisseria_sp._KEM232;_GQ203291	aacgggtgagtaatgtattggaacgtaccgagtaatgggggataaccaatcgaaagattggctaataccgcatacgtgagggggaaagcggcgttattcgagcggccaatatctgattagctggttggtggggtaaaggcctaccaaggcgacgatcagtagcgggtctgagaggatgatccgccacactgggactgagacacggcccagactcctacgggaggcagcagtggggaattttggacaatgggcgcaagcctgatccagccatgccgcgtgtctgaagaaggccttcgggttgtaaaggacttttgtcagggaagaatgacggtacctgaagaataagcaccggctaactacgtgccagcagccgcggtaatacgtagggtgcgagcgtta…
Neisseria_subflava	28449	Neisseria_subflava_strain_U37_16S_ribosomal_RNA,_partial_sequence	aacgggtgagtaatatatcggaacgtaccgagtaatgggggataactaatcgaaagattagctaataccgcatatttgaggaggaaagcagcgttattcgagcggccgatatctgattagctagttggtggggtaaaggcctaccaaggcgacgatcagtagcgggtctgagaggatgatccgccacactgggactgagacacggcccagactcctacgggaggcagcagtggggaattttggacaatgggcgcaagcctgatccagccatgccgcgtgtctgaagaaggccttcgggttgtaaaggacttttgtcagggaagaatgacggtacctgaagaataagcaccggctaactacgtgccagcagccgcggtaatacgtagggtgcgagcgtta…
Neisseria_zalophi	640030	Neisseria_zalophi_strain_CSL_7565_16S_ribosomal_RNA,_partial_sequence	aacgggtgagtaatgcatcggaacgtaccgagtagtgggggataactgtccgaaaggatggctaataccgcatacgtgagaaggaaagcggcgctattcgagcggccgatgtctgattagctagttggtggggtaagagcctaccaaggcgacgatcagtagcgggtctgagaggatgatccgccacactgggactgagacacggcccagactcctacgggaggcagcagtggggaattttggacaatgggggcaaccctgatccagccatgccgcgtgtctgaagaaggccttcgggttgtaaaggacttttgtcagggaagaatgacggtacctgaagaataagcaccggctaactacgtgccagcagccgcggtaatacgtagggtgcgagcgtta…
Neisseria_zoodegmatis	326523	Neisseria_zoodegmatis_strain_LMG_23012_16S_ribosomal_RNA,_partial_sequence	aacgggtgagtaatgcatcggaacgtaccgagtagtgggggataactgtccgaaaggatggctaataccgcatacgtgagaaggaaagcagcgctattcgagcggccgatgtctgattagctggttggtggggtaaaggcctaccaaggcgacgatcagtagcgggtctgagaggatgatccgccacactgggactgagacacggcccagactcctacgggaggcagcagtggggaattttggacaatgggcgcaagcctgatccagccatgccgcgtgtctgaagaaggccttcgggttgtaaaggacttttgtcagggaagaatgacggtacctgaagaataagcaccggctaactacgtgccagcagccgcggtaatacgtagggtgcgagcgtta…
Ochrobactrum_anthropi	439375	Ochrobactrum_anthropi_ATCC_49188_16S_ribosomal_RNA,_partial_sequence	gacgggtgagtaacgcgtgggaacgtaccttttgctacggaataactcagggaaacttgtgctaataccgtatgtgttcgggggaaagattcggcaaaggatcggcccgcgttggattagctagttggtgaggtaaaggctcaccaaggcgacgatccatagctggtctgagaggatgatcagccacactgggactgagacacggcccagactcctacgggaggcagcagtggggaatattggacaatgggcgcaagcctgatccagccatgccgcgtgagtgatgaaggccctagggttgtaaagctctttcaccggtgaagaatgacggtaaccggagaagaagccccggctaacttcgtgccagcagccgcggtaatacgaagggggctagcgttg…
Paenibacillus_guangzhouensis	1473112	Paenibacillus_guangzhouensis_strain_GSS02_16S_ribosomal_RNA,_partial_sequence	gacgggtgagtaacacgtggcaacctgcctgtaagatcgggataactaccggaaacggtagctaagaccggataatttgttgggaaaagcgtgcttacagatgggcctgcggcgcattagctagttggtggggtaacggctcaccaaggcgacgatgcgtagccgacctgagagggtgaacggccacactgggactgagacacggcccagactcctacgggaggcagcagtagggaatcttccgcaatggacgcaagtctgacggagcaacgccgcgtgagtgatgaaggttttcggatcgtaaagctctgttgccagggaagagtgacggtacctgagaagaaagccccggctaactacgtgccagcagccgcggtaatacgtagggggcaagcgttg…
Paenisporosarcina_antarctica	417367	Paenisporosarcina_antarctica_strain_N-05_16S_ribosomal_RNA,_partial_sequence	gacgggtgagtaacacgtggcaacctaccttgtagattgggataactccgggaaaccggggctaataccaaataataaatgttgaaaggcgcactacaagatgggcccgcggcgtattagctagttggtagggtaatggcctaccaaggcgacgatacgtagccgacctgagagggtgatcggccacactgggactgagacacggcccagactcctacgggaggcagcagtagggaatcttccacaatggacgaaagtctgatggagcaacgccgcgtgagtgaagaaggttttcggatcgtaaaactctgttgtaagggaagagtgacggtaccttattagaaagccacggctaactacgtgccagcagccgcggtaatacgtaggtggcaagcgttg…
Pantoea_agglomerans	549	Pantoea_agglomerans_strain_DSM_3493_16S_ribosomal_RNA,_partial_sequence	gacgggtgagtaatgtctggggatctgcccgatagagggggataaccactggaaacggtggctaataccgcataacgcaagaccaaagaggcactatcggatgaacccagatgggattagctagtaggcggggtaatggcccacctaggcgacgatccctagctggtctgagaggatgaccagccacactggaactgagacacggtccagactcctacgggaggcagcagtggggaatattgcacaatgggcgcaagcctgatgcagccatgccgcgtgtatgaagaaggccttcgggttgtaaagtactttcagcggggaggaatgacgttacccgcagaagaagcaccggctaactccgtgccagcagccgcggtaatacggagggtgcaagcgtta…
Pantoea_ananatis	1095774	Pantoea_ananatis_PA13;_CP003085	gacgggtgagtaatgtctggggatctgcccgatagagggggataaccactggaaacggtggctaataccgcataacgcaagaccaaagaggcactatcggatgaacccagatgggattagctagtaggcggggtaacggcccacctaggcgacgatccctagctggtctgagaggatgaccagccacactggaactgagacacggtccagactcctacgggaggcagcagtggggaatattgcacaatgggcgcaagcctgatgcagccatgccgcgtgtatgaagaaggccttcgggttgtaaagtactttcagcggggaggaatgacgttacccgcagaagaagcaccggctaactccgtgccagcagccgcggtaatacggagggtgcaagcgtta…
Pantoea_dispersa	59814	Pantoea_dispersa_strain_LMG_2603_16S_ribosomal_RNA,_partial_sequence	gacgggtgagtaatgtctgggaaactgcccgatggagggggataactactggaaacggtagctaataccgcataacgcragaccaaagtggcaccatcggatgtgcccagatgggattagctagtaggtggggtaatggctcacctaggcgacgatccctagctggtctgagaggatgaccagccacactggaactgagacacggtccagactcctacgggaggcagcagtggggaatattgcacaatgggcgcaagcctgatgcagccatgccgcgtgtatgaagaaggccttcgggttgtaaagtactttcagcggggaggaatgacgttacccgcagaagaagcaccggctaactccgtgccagcagccgcggtaatacggagggtgcaagcgtta…
Pantoea_eucalypti	470933	Pantoea_eucalypti_strain_LMG_24197_16S_ribosomal_RNA,_partial_sequence	gacgggtgagtaatgtctggggatctgcccgatagagggggataaccactggaaacggtggctaataccgcataacgcaagaccaaagaggcactatcggatgaacccagatgggattagctagtaggcggggtaatggcccacctaggcgacgatccctagctggtctgagaggatgaccagccacactggaactgagacacggtccagactcctacgggaggcagcagtggggaatattgcacaatgggcgcaagcctgatgcagccatgccgcgtgtatgaagaaggccttcgggttgtaaagtactttcagcggggaggaatgacgttacccgcagaagaagcaccggctaactccgtgccagcagccgcggtaatacggagggtgcaagcgtta…
Pantoea_sp.	1484158	Pantoea_sp._PSNIH1_chromosome,_complete_genome_16S	-------------------------------------------------------------------------------------------------------------------attagctagtaggtggggtaacggctcacctaggcgacgatccctagctggtctgagaggatgaccagccacactggaactgagacacggtccagactcctacgggaggcagcagtggggaatattgcacaatgggcgcaagcctgatgcagccatgccgcgtgtatgaagaaggccttcgggttgtaaagtactttcagcggggaggaatgacgttacccgcagaagaagcaccggctaactccgtgccagcagccgcggtaatacggagggtgcaagcgtta…
Pantoea_vagans	470934	Pantoea_vagans_strain_LMG_24199_16S_ribosomal_RNA,_partial_sequence	gacgggtgagtaatgtctggggatctgcccgatagagggggataaccactggaaacggtggctaataccgcataacgcaagaccaaagaggcactatcggatgaacccagatgggattagctagtaggcggggtaatggcccacctaggcgacgatccctagctggtctgagaggatgaccagccacactggaactgagacacggtccagactcctacgggaggcagcagtggggaatattgcacaatgggcgcaagcctgatgcagccatgccgcgtgtatgaagaaggccttcgggttgtaaagtactttcagcggggaggaatgacgttacccgcagaagaagcaccggctaactccgtgccagcagccgcggtaatacggagggtgcaagcgtta…
Parabacteroides_distasonis	823	Parabacteroides_distasonis_strain_JCM_5825_16S_ribosomal_RNA,_partial_sequence	cacgggtgagtaacgcgttgcaacttgcctatcagagggggataacccggcgaaagtcggactaataccgcatgaatatttgctaaagattcgctgatagataggcatgcgttccattaggcagttggcggggtaacggcccaccaaaccgacgatggataggggttctgagaggaaggtcccccacattggtactgagacacggaccaaactcctacgggaggcagcagtgaggaatattggtcaatgggcgtaagcctgaaccagccaagtcgcgtgagggatgaaggtctatggatcgtaaacctcttttataagggaatattgtatgtaccttatgaataaggatcggctaactccgtgccagcagccgcggtaatacggaggatccgagcgtta…
Parabacteroides_sp.	2025876	Parabacteroides_sp._DJF_B084;_EU728707	cacgggtgagtaacgcgttgcaacttacctatcagagggggatagcccggcsaaagtcggattaataccccataaatatttgttaaagattcgctgatagataggcatgcgttccattaggcagttggcggggtaacggcccaccaaaccgacgatggataggggttctgagaggaaggtcccccacattggtactgagacacggaccaaactcctacgggaggcagcagtgaggaatattggtcaatggccgagaggctgaaccagccaagtcgcgtgaaggaagaaggtctatggtttgtaaacttcttttataggggaatattgtatgtaccctatgaataagcatcggctaactccgtgccagcagccgcggtaatacggaggatgcgagcgtta…
Parvimonas_micra	33033	Parvimonas_micra_strain_3119B_16S_ribosomal_RNA,_partial_sequence	aacgggtgagtaacacgtagcaacctaccttacacagggggatagccgttggaaacgacgattaataccgcatgagtaggggtcaaagattcggtgtaagaagggctcgcgtctgattagctagttggaagggtaaaggcctaccaaggcgacgatcagtagccggtctgagaggatgaacggccacattggaactgagacacggtccaaactcctacgggaggcagcagtggggaatattgcacaatggggggaaccctgatgcagcgacgccgcgtgagcgaagaaggttttcgaatcgtaaagctctgtcctatgagaagaatgacggtatcataggaggaagccccggctaaatacgtgccagcagccgcggtaatacgtatggggcgagcgttg…
Pasteurella_multocida	747	Pasteurella_multocida_strain_CCUG_17976_16S_ribosomal_RNA,_partial_sequence	gacgggtgagtaatgcttgggaatctggcttatggagggggataactgtgggaaactgcagctaataccgcgtatttgaggaggaaagggttgccataagatgagcccaagtgggattaggtagttggtggggtaaaggcctaccaagcctgcgatctctagctggtctgagaggatgaccagccacactggaactgagacacggtccagactcctacgggaggcagcagtggggaatattgcgcaatggggggaaccctgacgcagccatgccgcgtgaatgaagaaggccttcgggttgtaaagttctttcggtaatgaggaatgacgttaattacagaagaagcaccggctaactccgtgccagcagccgcggtaatacggagggtgcgagcgtta…
Phytobacter_ursingii	1972431	Phytobacter_ursingii_strain_ATCC_27989_16S_ribosomal_RNA,_partial_sequence	gacgggtgagtaatgtctgggaaactgcccgatggagggggataactactggaaacggtagctaataccgcataacgcaagaccaaagaggtgccatcggatgtgcccagatgggattagctagtaggtggggtaatggctcacctaggcgacgatccctagctggtctgagaggatgaccagccacactggaactgagacacggtccagactcctacgggaggcagcagtggggaatattgcacaatgggcgcaagcctgatgcagccatgccgcgtgtgtgaagaaggccttcgggttgtaaagcactttcagcggggaggaatgacgttacccgcagaagaagcaccggctaactccgtgccagcagccgcggtaatacggagggtgcaagcgtta…
Porphyromonas_asaccharolytica	879243	Porphyromonas_asaccharolytica_DSM_20707_16S_ribosomal_RNA,_partial_sequence	aatgggtgagtaacacgttgcaacttacctcttagtggtgaataacccgatgaaagtcggactaatacaccatataga-ggaggaaagattcgctaagagatgggcctgcgttccattagctagttggtaaggtaacggcttaccaaggcaacgatggatagggggactgagaggttgaccccccacattgacactgagatacgggtcnaactcctacgggaggcagcagtgaggaatattggtcaatgggcgagagcctgaaccagccaagtcgcgtgaaggaagactgcccaagggttgtaaactncttttgtatgggattattgcagttaccatacgaataagcatcggctaactccgtgccagcagccgcggtaatacggaggatgcgagcgtta…
Porphyromonas_cangingivalis	36874	Porphyromonas_cangingivalis_strain_VPB_4874_16S_ribosomal_RNA,_partial_sequence	taagggtgcgtaacgcgttgcaacttgcctgtcagtggggaataacccggagaaatccggactaataccgcatacaactttaggaaagatttgctgacagataggcatgcgttccattagatagttggtgaggtaacggctcaccaagtcaacgatggataggggagctgagaggcttatcccccacactggaactgagacacggtccagactcctacgggaggcagcagtgaggaatattggtcaatgggcgagagcctgaaccagccaagtcgcgtgaaggaagacggcctatggattgtaaacttctttagtaggtgagtaaagcaagtaacctaagaataagtatcggctaactccgtgccagcagccgcggtaatacggaggatacgagcgtta…
Porphyromonas_crevioricanis	393921	Porphyromonas_crevioricanis_strain_VPB_4875_16S_ribosomal_RNA,_partial_sequence	cacgggtgcgtaacgcgttgcaacctacctgtcagactgggataacccggtgaaagccggactaatactggatacaggataaggaaagatttactgacagatgggcatgcgttccattagctagttggtgaggtaacggctcaccaaggcgacgatggataggggaactgagaggtttatcccccacactggtactgagacacggaccagactcctacgggagncagcagtgaggaatcttggtcaatgggcgagagcctgaaccagccaagtcgcgtgagggcagacggcctaaggattgtaaacctctttttcaggggagtattgcaagtaccctgcgaataagcatcggctaactccgtgccagcagccgcggtaatacggaggatgcgagcgtta…
Porphyromonas_gingivalis	837	Porphyromonas_gingivalis_strain_JCM_12257_16S_ribosomal_RNA,_partial_sequence	cacgggtgcgtaacgcgttgcaacttgccttacagagggggataacccgttgaaagacggactaaaaccgcatacattacaaggaaatattagctgtaagataggcatgcgtcccattagctagttggtgaggtaacggctcaccaaggcgacgatgggtaggggaactgagaggtttatcccccacactggtactgagacacggaccagactcctacgggaggcagcagtgaggaatattggtcaatgggcgagagcctgaaccagccaagtcgcgtgaaggaagactgcctaaggattgtaaacttcttttatacgggaatattgaatgtaccgtaagaataagcatcggctaactccgtgccagcagccgcggtaatacggaggatgcgagcgtta…
Prevotella_dentalis	908937	Prevotella_dentalis_DSM_3688_16S_ribosomal_RNA,_partial_sequence	cacgggtgagtaacgcgttccaacctaccttcaagcaggggacaatccgtagaaatgcggtctgataccctatgtagttggaagaaaggttcgcttgttgatggggatgcgtccgattagcttgttggcggggcaacggcccaccaaggcaacgatcggtaggggttctgagaggaaggtcccccacactggaactgagacacggtccagactcctacgggaggcagcagtgaggaatattggtcaatgggcgtaagcctgaaccagccaagtagcgtgcaggatgacggcctatgggttgtaaactgcttttatacggggatattgcaggtaccgtatgaataaggaccggctaattccgtgccagcagccgcggtaatacggaaggtccgggcgtta…
Prevotella_denticola	28129	Prevotella_denticola_strain_ATCC_35308_16S_ribosomal_RNA,_partial_sequence	cacgggtgagtaacgcgttccaaccttcccgttactgcgggataacctgccgaaaggcagactaataccgcatgttttcgaagcaaagatccggtaacggagggggatgcgtctgattagctagttggcggggcgacggcccaccaaggcgacgatcagtaggggttctgagaggaaggtcccccacattggaactgagacacggtccaaactcctacgggaggcagcagtgaggaatattggtcaatgggcggaagcctgaaccagccaagtagcgtgcaggangacggcctacgggttgtaaactgcttttatgcggggatattgcaggtaccgcatgaataaggaccggctaattccgtgccagcagccgcggtaatacggaaggtccgggcgtta…
Prevotella_enoeca	76123	Prevotella_enoeca_strain_ATCC_51261_16S_ribosomal_RNA,_partial_sequence	cacgggtgagtaacgcgttccaacctacccatgactaagggataacccgtcgaaagtcggcctaagaccttatgtatttggatgaaagatttggtgatggatggggatgcgtctgattagcttgtcggtgaggtaacggctcaccgaggcaacgatcagtaggggttctgagaggaaggtcccccacattggaactgagacacggtccaaactcctacgggaggcagcagtgaggaatattggtcaatggacgatagtctgaaccagccaagtagcgtgcaggatgacggcctatgggttgtaaactgcttttatgcggggatattgcatgtaccgcatgaataaggaccggctaattccgtgccagcagccgcggtaatacggaaggtccaggcgtta…
Prevotella_fusca	1236517	Prevotella_fusca_JCM_17724_16S_ribosomal_RNA,_partial_sequence	cacgggtgagtaacgcgttccaaccttcccatgaccgggggataacctgccgaaaggcagactaataccccatggctgtgaagtaaagattcggtcatggatggggatgcgtctgattagcttgttggcggggtaacggcccaccaaggctacgatcagtaggggttctgagaggaaggtcccccacattggaactgagacacggtccaaactcctacgggaggcagcagtgaggaatattggtcaatgggcgcaagcctgaaccagccaagtagcgtgcaggacgacggcctatgggttgtaaactgcttttgtacggggatattgcaggtaccgtacgaataaggaccggctaattccgtgccagcagccgcggtaatacggaaggtccgggcgtta…
Prevotella_intermedia	28131	Prevotella_intermedia_strain_B422_16S_ribosomal_RNA,_partial_sequence	cacgggtgagtatcgcgttccaaccttccctccactcggggataccccgttgaaagacggcctaatacccgatgttcgtggaccaaagattcggtggaggatggggatgcgtctgattagcttgttggtggggtaacggcccaccaaggctacgatcagtaggggttctgagaggaaggtcccccacattggaactgagacacggtccaaactcctacgggaggcagcagtgaggaatattggtcaatggacgtaagtctgaaccagccaagtagcgtgcaggatgacggcctatgggttgtaaactgcttttgttggggagtattgcatttacccttcgaataaggaccggctaattccgtgccagcagccgcggtaatacggaaggtccaggcgtta…
Prevotella_jejuni	1177574	Prevotella_jejuni_strain_CD3:28_16S_ribosomal_RNA,_partial_sequence	cacgggtgagtaacgcgttccaacctacccattactgtgggataacctgccgaaaggcagactaataccgcatagttttgaagtaaagattcggtaatggatggggatgcgtctgattagcttgttggcggggtaacggcccaccaaggcaacgatcagtaggggttctgagaggaaggtcccccacattggaactgagacacggtccaaactcctacgggaggcagcagtgaggaatattggtcaatgggcgcgagcctgaaccagccaagtagcgtgcaggatgacggcctatgggttgtaaactgcttttgtatggggatattgcaggtaccatacgaataaggaccggctaattccgtgccagcagccgcggtaatacggaaggtccgggcgtta…
Prevotella_melaninogenica	28132	Prevotella_melaninogenica;_L16469	cacgggtgagtaacgcgttccaaccttcccattactgtgggataacctgccgaaaggcngactaataccgcatagttttgaagtaaagattcggtaatggatggggatgcgtctgattagcttgttggcggggtaacggcccaccaaggcaacgatcagtaggggttctgagaggaaggtcccccacattggaactgagacacggtccnaactcctacgggaggcagcagtgaggaatattggtcaatggacggaagtctgaaccagccaagtagcgtgcaggatgacggcctntgggttgtaaactncntttgtatggggatattgcaggtaccatacgaataaggaccggctnattccgtgccagcagccgcggtaatacggaaggtccnggcgtta…
Prevotella_oris	28135	Prevotella_oris_strain_ATCC_33573_16S_ribosomal_RNA,_partial_sequence	cacgggtgagtaacgcgttccaacctgcctctgactgagggataacccgtcgaaagtcggcctaatacctcatggccgacgattaaagattcggtcagggatggggatgcgtctgattagcttgttggcggggtaacggcccaccaaggcgncgatcagtaggggttctgagaggaaggtcccccacattggaactgagacacggtccaaactcctacgggaggcagcagtgaggaatattggtcaatgggcgagagcctgaaccagccaagtagcgtgcaggatgacggcctatgggttgtaaactncttttatgcggggatattgcaggtaccgcatgaataaggaccggctnattccgtgccagcagccgcggtaatacggaaggtccnggcgtta…
Prevotella_ruminicola	264731	Prevotella_ruminicola_23;_Bryant_23;_CP002006	cacgggtgagtaacgcgttccaaccttccctatagtagagaatagcccggcgaaagtcggattaatgctctatgttagaataccaaaggttcgctataggatggggatgcgtctgattaggtagtaggcggggtaacggcccacctagccgacgatcagtaggggttctgagaggaaggtcccccacattggaactgagacacggtccaaactcctacgggaggcagcagtgaggaatattggtcaatggacggaagtctgaaccagccaagtagcgtgcaggatgacggcctatgggttgtaaactgcttttatatagggatattgtaggtactatatgaataaggaccggctaattccgtgccagcagccgcggtaatacggaaggtccaggcgtta…
Prevotella_scopos	1236518	Prevotella_scopos_JCM_17725_16S_ribosomal_RNA,_partial_sequence	cacgggtgagtaacgcgttccaaccttcccattactgtgggataacctgccgaaaggcagactaataccgcatggttttgaagtaaagattcggtaatggatggggatgcgtctgattagcttgttggcggggtaacggcccaccaaggcaacgatcagtaggggttctgagaggaaggtcccccacattggaactgagacacggtccaaactcctacgggaggcagcagtgaggaatattggtcaatggacgtaagtctgaaccagccaagtagcgtgcaggatgacggcctatgggttgtaaactgcttttttatgggaatattgcaggtaccatacgaataaggaccggctaattccgtgccagcagccgcggtaatacggaaggtccaggcgtta…
Prevotella_sp.	575614	Prevotella_sp._oral_taxon_299_str._F0039;_CP003666	cacgggtgagtaacgcgttccaacctacccaatactcaggcataacccgttgaaagacggactaattcctgatggttatacattaaagaaccggtattggatggggatgcgtctgattagtttgttggtgaggtaacggctcaccaagacatcgatcagtaggggttctgagaggaaggtcccccacattggaactgagacacggtccaaactcctacgggaggcagcagtgaggaatattggtcaatggatggaaatctgaaccagccaagtagcgtgcaggatgacggcctatgggttgtaaactgcttttatgtgagaatattgcatgtatcacatgaataaggaccggctaattccgtgccagcagccgcggtaatacggaaggtccgggcgtta…
Proteus_mirabilis	584	Proteus_mirabilis_strain_M13_16S_ribosomal_RNA_gene,_partial_sequence_OL629241.1	gacgggtgagtaatgtatggggatctgcccgatagagggggataactactggaaacggtggctaataccgcataattacggaccaaagcagcactatcggatgaacccatatgggattagctagtaggtggggtaaaggctcacctaggcgacgatctctagctggtctgagaggatgatcagccacactgggactgagacacggcccagactcctacgggaggcagcagtggggaatattgcacaatgggcgcaagcctgatgcagccatgccgcgtgtatgaagaaggccttagggttgtaaagtactttcagcggggaggaatgacgttacccgcagaagaagcaccggctaactccgtgccagcagccgcggtaatacggagggtgcaagcgtta…
Providencia_stuartii	588	Providencia_stuartii_strain_ATCC_29914_16S_ribosomal_RNA,_partial_sequence	gacgggtgagtaatgtatggggatctgcccgatagagggggataactactggaaacggtggctaataccgcataatttaggagcaaagcagcgctgtcggatgaacccatatgggattagctagtaggtaaggtaatggcttacctaggcgacgatccctagctggtctgagaggatgatcagccacactgggactgagacacggcccagactcctacgggaggcagcagtggggaatattgcacaatgggcgcaagcctgatgcagccatgccgcgtgtatgaagaaggccctagggttgtaaagtactttcagtcgggaggaatgacgttaccgacagaagaagcaccggctaactccgtgccagcagccgcggtaatacggagggtgcaagcgtta…
Pseudescherichia_vulneris	566	Pseudescherichia_vulneris_strain_ATCC_33821_16S_ribosomal_RNA,_partial_sequence	gacgggtgagtaatgtctgggaaactgcctgatggagggggataactactggaaacggtggctaataccgcataacgcaagaccaaagaggtgccatcagatgtgcccagatgggattagctagtaggtggggtaamggctcacctaggcgacgatccctagctggtctgagaggatgaccagccacactggaactgagacacggtccagactcctacgggaggcagcagtggggaatattgcacaatgggcgcaagcctgatgcagccatgccgcgtgtatgaagaaggccttcgggttgtaaagtactttcagcggggaggaatgacgttacccgcagaagaagcaccggctaactccgtgccagcagccgcggtaatacggagggtgcaagcgtta…
Pseudomonas_aeruginosa	287	Pseudomonas_aeruginosa_strain_DSM_50071_16S_ribosomal_RNA,_complete_sequence	gacgggtgagtaatgcctaggaatctgcctggtagtgggggataacgtccggaaacggccgctaataccgcatacgtgagggagaaagtcgcgctatcagatgagcctaggtcggattagctagttggtggggtaaaggcctaccaaggcgacgatccgtaactggtctgagaggatgatcagtcacactggaactgagacacggtccagactcctacgggaggcagcagtggggaatattggacaatgggcgcaagcctgatccagccatgccgcgtgtgtgaagaaggtcttcggattgtaaagcactttaagttgggaggaatgacgttaccaacagaataagcaccggctaacttcgtgccagcagccgcggtaatacgaagggtgcaagcgtta…
Pseudomonas_denitrificans	43306	Pseudomonas_denitrificans;_IAM_12023;_AB021419	gacgggtgagtaacacctgggaatctgcctggtagtgggggataacgttcggaaacgggcgctaataccgcatacgtacgggagaaagcagcgctatcagatgagcccaggtcggattagctagtaggtgaggtaatggctcacctaggcgacgatccgtaactggtctgagaggatgatcagtcacactggaactgagacacggtccagactcctacgggaggcagcagtggggaatattggacaatgggggaaaccctgatccagccatgccgcgtgtgttaagaaggtcttcggattgtaaagcactttaagttgggaggaatgacgttaccgacagaataagcaccggctaactctgtgccagcagccgcggtaatacagagggtgcaagcgtta…
Pseudomonas_fluorescens	136843	Pseudomonas_fluorescens;_Q2-87;_AJ278813	gacgggtgagtaatgcctaggaatctgcctggtagtgggggataacgctcggaaacggacgctaataccgcatacgtacgggagaaagcagcgctatcagatgagcctaggtcggattagctagttggtggggtaatggctcaccaaggcgacgatccgtaactggtctgagaggatgatcagtcacactggaactgagacacggtccagactcctacgggaggcagcagtggggaatattggacaatgggcgaaagcctgatccagccatgccgcgtgtgtgaagaaggtcttcggattgtaaagcactttaagttgggaggaatgacgttaccgacagaataagcaccggctaactctgtgccagcagccgcggtaatacagagggtgcaagcgtta…
Pseudomonas_fragi	296	Pseudomonas_fragi_strain_ATCC_4973_16S_ribosomal_RNA,_partial_sequence	gacgggtgagtaatacctaggaatctgcctgatagtgggggataacgttcggaaacggacgctaataccgcatacgtacgggagaaagcagcgctatcagatgagcctaggtcggattagctagttggtgaggtaatggctcaccaaggctacgatccgtaactggtctgagaggatgatcagtcacactggaactgagacacggtccagactcctacgggaggcagcagtggggaatattggacaatgggcgaaagcctgatccagccatgccgcgtgtgtgaagaaggtcttcggattgtaaagcactttaagttgggaggaatgacgttaccgacagaataagcaccggctaactctgtgccagcagccgcggtaatacagagggtgcaagcgtta…
Pseudomonas_oryzihabitans	47885	Pseudomonas_oryzihabitans_strain_L-1_16S_ribosomal_RNA,_partial_sequence	gacgggtgagtaatgcctaggaatctgcctggtagtgggggacaacgtttcgaaaggaacgctaataccgcatacgtacgggagaaagcagcgctatcagatgagcctaggtcggattagctagttggtggggtaatggctcaccaaggcgacgatccgtaactggtctgagaggatgatcagtcacactggaactgagacacggtccagactcctacgggaggcagcagtggggaatattggacaatgggcgaaagcctgatccagccatgccgcgtgtgttaagaaggtcttcggattgtaaagcactttaagttgggaggaatgacgttaccgacagaataagcaccggctaactctgtgccagcagccgcggtaatacagagggtgcaagcgtta…
Pseudomonas_protegens	380021	Pseudomonas_protegens_strain_CHA0_16S_ribosomal_RNA,_partial_sequence	gacgggtgagtaatgcctaggaatctgcctagtagtgggggataacgtccggaaacgggcgctaataccgcatacgtacgggagaaagtggcgctattagatgagcctaggtcggattagctagttggtgaggtaatggctcaccaaggcgacgatccgtaactggtctgagaggatgatcagtcacactggaactgagacacggtccagactcctacgggaggcagcagtggggaatattggacaatgggcgaaagcctgatccagccatgccgcgtgtgtgaagaaggtcttcggattgtaaagcactttaagttgggaggaatgacgttaccgacagaataagcaccggctaactctgtgccagcagccgcggtaatacagagggtgcaagcgtta…
Pseudomonas_putida	303	Pseudomonas_putida_strain_IAM_1236_16S_ribosomal_RNA,_partial_sequence	gacgggtgagtaatgcctaggaatctgcctggtagtgggggacaacgtttcgaaaggaacgctaataccgcatacgtacgggagaaagcggcgctatcagatgagcctaggtcggattagctagttggtgaggtaatggctcaccaaggcgacgatccgtaactggtctgagaggatgatcagtcacactggaactgagacacggtccagactcctacgggaggcagcagtggggaatattggacaatgggcgaaagcctgatccagccatgccgcgtgtgttaagaaggtcttcggattgtaaagcactttaagttgggaggaatcacgttaccgacagaataagcaccggctaactctgtgccagcagccgcggtaatacagagggtgcaagcgtta…
Pseudomonas_sp.	2597770	Pseudomonas_sp._BJP69_chromosome,_complete_genome_16S	-------------------------------------------------------------------------------------------------------------------attagcttgttggtgaggtaatggctcaccaaggcgacgatccgtaactggtctgagaggatgatcagtcacactggaactgagacacggtccagactcctacgggaggcagcagtggggaatattgggcaatgggcgaaagcctgatccagccatgccgcgtgtgtgaagaaggtcttcggattgtaaagcactttaagttgggaggaatgacgttaccgacagaataagcaccggctaactctgtgccagcagccgcggtaatacagagggtgcaagcgtta…
Pseudomonas_syringae	1357279	Pseudomonas_syringae_CC1557;_CP007014	gacgggtgagtaatgcctaggaatctgcctggtagtgggggataacgctcggaaacggacgctaataccgcatacgtacgggagaaagcagcgctatcagatgagcctaggtcggattagctagttggtgaggtaatggctcaccaaggcgacgatccgtaactggtctgagaggatgatcagtcacactggaactgagacacggtccagactcctacgggaggcagcagtggggaatattggacaatgggcgaaagcctgatccagccatgccgcgtgtgtgaagaaggtcttcggattgtaaagcactttaagttgggaggaatgacgttaccgacagaataagcaccggctaactctgtgccagcagccgcggtaatacagagggtgcaagcgtta…
Pseudomonas_trivialis	200450	Pseudomonas_trivialis_strain_P_513/19_16S_ribosomal_RNA,_partial_sequence	gacgggtgagtaatgcctaggaatctgcctggtagtgggggataacgttcggaaacggacgctaataccgcatacgtacgggagaaagcagcgctatcagatgagcctaggtcggattagctagttggtggggtaatggctcaccaaggcgacgatccgtaactggtctgagaggatgatcagtcacactggaactgagacacggtccagactcctacgggaggcagcagtggggaatattggacaatgggcgaaagcctgatccagccatgccgcgtgtgtgaagaaggtcttcggattgtaaagcactttaagttgggaggaatgacgttaccgacagaataagcaccggctaactctgtgccagcagccgcggtaatacagagggtgcaagcgtta…
Psychrobacter_sp.	1699621	Psychrobacter_sp._es9;_AJ551129	gacgggtgagtaatgcctaggaatctgcctggtagtgggggacaacgtttcgaaaggaacgctaataccgcatacgtacgggagaaagcagcgctatcagatgagcctaggtcggattagctagttggtgaggtaatggctcaccaaggctgcgatccgtaactggtctgagaggatgatcagtcacactggaactgagacacggtccagactcctacgggaggcagcagtggggaatattggacaatgggcgaaagcctgatccagccatgccgcgtgtgtgaagaaggtcttcggattgtaaagcactttaagttgggaggaatgacgttaccgacagaataagcaccggctaacttcgtgccagcagccgcggtaatacgaagggtgcaagcgtta…
Rahnella_aquatilis	745277	Rahnella_aquatilis_CIP_78.65_=_ATCC_33071_strain_DSM_4594_16S_ribosomal_RNA,_partial_sequence	gacgggtgagtaatgtctgggaaactgcctgatggagggggataactactggaaacggtagctaataccgcatgacgaaagagcaaagtggcgccatcggatgtgcccagatgggattagctagtaggtgaggtaatggctcacctaggcgacgatccctagctggtctgagaggatgaccagccacactggaactgagacacggtccagactcctacgggaggcagcagtggggaatattgcacaatgggcgcaagcctgatgcagccatgccgcgtgtgtgaagaaggccttagggttgtaaagcactttcagcgaggaggaatgacgttactctcagaagaagcaccggctaactccgtgccagcagccgcggtaatacggagggtgcaagcgtta…
Rahnella_sp.	1805933	Rahnella_sp._'CDC_1-576';_U88434	gacgggtgagtaatgtctgggraactgcctgatggagggggataactactggaaacggtagctaataccgcatgacgcaagagcaaagtggcgccatcggatgtgcccagatgggattagctagtaggtgaggtaatggctcacctaggcgacgatccctagctggtctgagaggatgaccagccacactggaactgagacacggtccagactcctacgggaggcagcagtggggaatattgcacaatgggcgcaagcctgatgcagccatgccgcgtgtgtgaagaaggccttagggttgtaaagcactttcagcgaggaggaatgacgttactcgcagaagaagcaccggctaactccgtgccagcagccgcggtaatacggagggtgcaagcgtta…
Ralstonia_solanacearum	305	Ralstonia_solanacearum_strain_K60-1_16S_ribosomal_RNA,_partial_sequence	aacgggtgagtaatacatcggaacgtgccctgtagtgggggataactagtcgaaagactggctaataccgcatacgtgagggtgaaagtggtgctataggagcggccgatgtctgattagctagttggtggggtaaaggcctaccaaggcgacgatcagtagctggtctgagaggacgatcagccacactgggactgagacacggcccagactcctacgggaggcagcagtggggaattttggacaatgggggcaaccctgatccagcaatgccgcgtgtgtgaagaaggccttcgggttgtaaagcacttttgtccggaaagaatgacggtaccggaagaataaggaccggctaactacgtgccagcagccgcggtaatacgtagggtccaagcgtta…
Raoultella_ornithinolytica	54291	Raoultella_ornithinolytica_strain_CIP_103364_16S_ribosomal_RNA,_partial_sequence	gacgggtgagtaatgtctgggaaactgcctgatggagggggataactactggaaacggtagctaataccgcataacgcaagaccaaagtggtgccatcagatgtgcccagatgggattagctagtaggtggggtaatggctcacctaggcgacgatccctagctggtctgagaggatgaccagccacactggaactgagacacggtccagactcctacgggaggcagcagtggggaatattgcacaatgggcgcaagcctgatgcagccatgccgcgtgtatgaagaaggccttcgggttgtaaagtactttcagcgaggaggaatgacgttactcgcagaagaagcaccggctaactccgtgccagcagccgcggtaatacggagggtgcaagcgtta…
Raoultella_planticola	575	Raoultella_planticola_strain_NBRC_14939_16S_ribosomal_RNA,_partial_sequence	gacgggtgagtaatgtctgggaaactgcctgatggagggggataactactggaaacggtagctaataccgcataacgcaagaccaaagtggtgccatcagatgtgcccagatgggattagctagtaggtggggtaatggctcacctaggcgacgatccctagctggtctgagaggatgaccagccacactggaactgagacacggtccagactcctacgggaggcagcagtggggaatattgcacaatgggcgcaagcctgatgcagccatgccgcgtgtatgaagaaggccttcgggttgtaaagtactttcagcgaggaggaatgacgttactcgcagaagaagcaccggctaactccgtgccagcagccgcggtaatacggagggtgcaagcgtta…
Raoultella_sp.	2583577	Raoultella_sp._CIQ051101;_DQ470482	gacgggtgagtaatgtctgggaaactgcctgatggagggggataactactggaaacggtagctaataccgcataacgcaagaccaaagtggtgccatcagatgtgcccagatgggattagctagtaggtggggtaatggctcacctaggcgacgatccctagctggtctgagaggatgaccagccacactggaactgagacacggtccagactcctacgggaggcagcagtggggaatattgcacaatgggcgcaagcctgatgcagccatgccgcgtgtatgaagaaggccttcgggttgtaaagtactttcagcgaggaggaatgacgttactcgcagaagaagcaccggctaactccgtgccagcagccgcggtaatacggagggtgcaagcgtta…
Raoultella_terrigena	577	Raoultella_terrigena_strain_84_16S_ribosomal_RNA,_partial_sequence	gacgggtgagtaatgtctgggaaactgcctgatggagggggataactactggaaacggtagctaataccgcataacgcaagaccaaagtggtgccatcagatgtgcccagatgggattagctagtaggtgaggtaatggctcacctaggcgacgatccctagctggtctgagaggatgaccagccacactggaactgagacacggtccagactcctacgggaggcagcagtggggaatattgcacaatgggcgcaagcctgatgcagccatgccgcgtgtatgaagaaggccttcgggttgtaaagtactttcagcgaggaggaatgacgttactcgcagaagaagcaccggctaactccgtgccagcagccgcggtaatacggagggtgcaagcgtta…
Rhizobium_sp.	424182	Rhizobium_pusense_strain_IRBG74_genome_assembly,_CHRII_16S	-------------------------------------------------------------------------------------------------------------------attagctagttggtggggtaaaggcctaccaaggcgacgatccatagctggtctgagaggatgatcagccacattgggactgagacacggcccaaactcctacgggaggcagcagtggggaatattggacaatgggcgcaagcctgatccagccatgccgcgtgagtgatgaaggccttagggttgtaaagctctttcaccgatgaagaatgacggtagtcggagaagaagccccggctaacttcgtgccagcagccgcggtaatacgaagggggctagcgttg…
Rhodococcus_erythropolis	1289591	Rhodococcus_erythropolis;_DCL14;_AJ131637	aacgggtgagtaacacgtggtgatctgccctgcacttcgggataagcctgggaaactgggtctaataccggatatgtggggtggaaagattcggtgcaggatgggcccgcggcctatcagcttgttggtggggtaatggcctaccaaggcgacgacgggtagccgacctgagagggtgaccggccacactgggactgagacacggcccagactcctacgggaggcagcagtggggaatattgcacaatgggcgaaagcctgatgcagcgacgccgcgtgagggatgacggccttcgggttgtaaacctctttcagcagggacgagtgacggtacctgcagaagaagcaccggctaactacgtgccagcagccgcggtaatacgtagggtgcaagcgttg…
Rhodococcus_sp.	2054902	Rhodococcus_sp._AQ5-07_chromosome,_complete_genome_16S	--------------------------------------------------------------------------------------------------ggatgggcccgcggcctatcagcttgttggtggggtaatggcctaccaaggcgacgacgggtagccgacctgagagggtgaccggccacactgggactgagacacggcccagactcctacgggaggcagcagtggggaatattgcacaatgggcgaaagcctgatgcagcgacgccgcgtgagggatgacggccttcgggttgtaaacctctttcagcagggacgagtgacggtacctgcagaagaagcaccggctaactacgtgccagcagccgcggtaatacgtagggtgcaagcgttg…
Roseburia_hominis	301301	Roseburia_hominis_(T);_type_strain:_A2-183;_AJ270482	gacgggtgagtaacgcgtggtaacctgcctcatacagggggataacagttggaaacgactgctaataccgcataagcagtgtgaaaaactctggtatgagatggacccgcgtctgattagccagttggcggggtaacggcccaccaaagcgacgatcagtagccgacctgagagggtgaccggccacattgggactgagacacggcccaaactcctacgggaggcagcagtggggaatattgcacaatgggggaaaccctgatgcagcgacgccgcgtgagcgaagaagtatttcggtatgtaaagctctatcagcagggaagaaatgcggtacctgactaagaagcaccggctaaatacgtgccagcagccgcggtaatacgtatggtgcaagcgtta…
Rothia_aeria	172042	Rothia_aeria_strain_A1-17B_16S_ribosomal_RNA,_partial_sequence	aacgggtgagtaatacgtagtgacctacctttgactctgggataagcctgggaaactgggtctaataccggatacggttggtggaaagcgttggttttagatgggctcacggcctatcagcttgttggtgaggtaatggcttaccaaggcgacgacgggtagccggcctgagagggtgaccggccacactgggactgagacacggcccagactcctacgggaggcagcagtggggaatattgcacaatgggcgcaag-ctgatgcagcgacgccgcgtgagggatgacggccttcgggttgtaaacctctgttagcatcgaagagtgacggtaggtgcagagaaagcgccggctaactacgtgccagcagccgcggtaatacgtagggcgcgagcgttg…
Rothia_mucilaginosa	43675	Rothia_mucilaginosa_strain_DSM_20746_16S_ribosomal_RNA,_partial_sequence	aacgggtgagtaacacgtagtaacctacccttaactctgggataagcctgggaaactgggtctaataccggatacggttggtggaaagcgttggttatagatgggctcacggcctatcagcttgttggtgaggtaacggctcaccaaggcgacgacgggtagccggcctgagagggtgaccggccacactgggactgagacacggcccagactcctacgggaggcagcagtggggaatattgcacaatgggcgcaagcctgatgcagcgacgccgcgtgagggatgacggccttcgggttgtaaacctctgttagcagggaagattgacggtacctgcagagaaagcgccggctaactacgtgccagcagccgcggtaatacgtagggcgcgagcgttg…
Salmonella_enterica	28901	Salmonella_enterica_subsp._arizonae_serovar_62:z4,z23:-_strain_RSK2980_chromosome,_complete_genome_16S	-------------------------------------------------------------------------------------------------------------------attagcttgttggtgaggtaacggctcaccaaggcgacgatccctagctggtctgagaggatgaccagccacactggaactgagacacggtccagactcctacgggaggcagcagtggggaatattgcacaatgggcgcaagcctgatgcagccatgccgcgtgtatgaagaaggccttcgggttgtaaagtactttcagcggggaggaatgacgttacccgcagaagaagcaccggctaactccgtgccagcagccgcggtaatacggagggtgcaagcgtta…
Schaalia_odontolytica	1660	Schaalia_odontolytica_strain_CCUG_20536_16S_ribosomal_RNA,_partial_sequence	aacgggtgagtaacacgtagtaacctgcccccttctttgggataacgcccggaaacgggtgctaatactggatattgttggtggaaaggtttggtgggggatgggctcgcggcctatcagcttgttggtggggtgatggcctaccaaggctttgacgggtagccggcctgagagggtgaccggtcacattgggactgagatacggcccagactcctacgggaggcagcagtggggaatattgcacaatgggcgaaagcctgatgcagcgacgccgcgtgagggatggaggccttcgggttgtaaacctctttcgctcatggtcagtgagggtagtgggtaaagaagcgccggctaactacgtgccagcagccgcggtaatacgtagggcgcgagcgttg…
Sediminicola_sp.	1453352	Sediminicola_sp._YIK13,_complete_genome_16S	cacgggtgcgcaacgcgttacaatctgccttatgctgagggatagcccagagaaatttggattaatacctcatggtttctgattaaaggtccggcataagatgagtatgcgtcccattagctagttggtgtggtaacggcacaccaaggcaacgatgggtaggggtcctgagagggagatcccccacactggtactgagacacggaccagactcctacgggaggcagcagtgaggaatattggacaatggacggaagtctgatccagccatgccgcgtgcaggaagacggcctatggattgtaaactgcttttatacgggaagagtgacggtaccgtaagaataaggatcggctaactccgtgccagcagccgcggtaatacggaggatccaagcgtta…
Selenomonas_sputigena	546271	Selenomonas_sputigena_ATCC_35185_16S_ribosomal_RNA,_partial_sequence	aacgggtgagtaacacgtggcaacctgccgacaggatggggacaacattccgaaaggaatgctaataccgaatggacccggataaaagatgcgcctgtcgatgggcctgcgtctgattagccagttggcggggtaacggcccaccaaagcgacgatcagtagccggtctgagaggatgaacggccacattgggactgagacacggcccagactcctacgggaggcagcagtggggaatcttccacaatgggcgaaagcctgatggagcaacgccgcgtgagtgaagaaggtcttcggatcgtaaagctctgttgcacgggacgagtgacggtaccgagcgaggaagccacggctaactacgtgccagcagccgcggtaatacgtaggtggcgagcgttg…
Serratia_liquefaciens	614	Serratia_liquefaciens_strain_CIP_103238_16S_ribosomal_RNA,_partial_sequence	gacgggtgagtaatgtctgggaaactgcctgatggagggggataactactggaaacggtagctaataccgcataactacggaccaaagtggtgccatcagatgtgcccagatgggattagctagtaggtggggtaatggctcacctaggcgacgatccctagctggtctgagaggatgaccagccacactggaactgagacacggtccagactcctacgggaggcagcagtggggaatattgcacaatgggcgcaagcctgatgcagccatgccgcgtgtgtgaagaaggccttcgggttgtaaagcactttcagcgaggaggaatgacgttactcgcagaagaagcaccggctaactccgtgccagcagccgcggtaatacggagggtgcaagcgtta…
Serratia_marcescens	615	Serratia_marcescens_subsp._sakuensis_strain_KRED_16S_ribosomal_RNA,_partial_sequence	gacgggtgagtaatgtctgggaaactgcctgatggagggggataactactggaaacggtagctaataccgcataacgcaagaccaaagaggtgccatcagatgtgcccagatgggattagctagtaggtggggtaatggctcacctaggcgacgatccctagctggtctgagaggatgaccagccacactggaactgagacacggtccagactcctacgggaggcagcagtggggaatattgcacaatgggcgcaagcctgatgcagccatgccgcgtgtgtgaagaaggccttcgggttgtaaagcactttcagcgaggaggaatgacgttactcgcagaagaagcaccggctaactccgtgccagcagccgcggtaatacggagggtgcaagcgtta…
Serratia_plymuthica	1154756	Serratia_plymuthica_(T);_DSM_4540;_AJ233433	gacgggtgagtaatgtctgggaaactgcctgatggagggggataactactggaaacggtagctaataccgcataactacggaccaaagtggcgccatcagatgtgcccagatgggattagctagtaggtggggtaatggctcacctaggcgacgatccctagctggtctgagaggatgaccagccacactggaactgagacacggtccagactcctacgggaggcagcagtggggaatattgcacaatgggcgcaagcctgatgcagccatgccgcgtgtgtgaagaaggccttagggttgtaaagcactttcagcgaggaggaatgacgttactcgcagaagaagcaccggctaactccgtgccagcagccgcggtaatacggagggtgcaagcgtta…
Serratia_proteamaculans	28151	Serratia_proteamaculans_strain_DSM_4543_16S_ribosomal_RNA,_partial_sequence	gacgggtgagtaatgtctgggaaactgcctgatggagggggataactactggaaacggtagctaataccgcataacttcggaccaaagtggcgccatcagatgtgcccagatgggattagctagtaggtggggtaatggctcacctaggcgacgatccctagctggtctgagaggatgaccagccacactggaactgagacacggtccagactcctacgggaggcagcagtggggaatattgcacaatgggcgcaagcctgatgcagccatgccgcgtgtgtgaagaaggccttcgggttgtaaagcactttcagcgaggaggaatgacgttactcgcagaagaagcaccggctaactccgtgccagcagccgcggtaatacggagggtgcaagcgtta…
Serratia_sp.	2447890	Serratia_sp._1D1416_chromosome,_complete_genome_16S	-------------------------------------------------------------------------------------------------------------------attagctagtaggtggggtaatggctcacctaggcgacgatccctagctggtctgagaggatgaccagccacactggaactgagacacggtccagactcctacgggaggcagcagtggggaatattgcacaatgggcgcaagcctgatgcagccatgccgcgtgtgtgaagaaggccttcgggttgtaaagcactttcagcgaggaggaatgacgttactcgcagaagaagcaccggctaactccgtgccagcagccgcggtaatacggagggtgcaagcgtta…
Shinella_sp.	879274	Shinella_sp._HZN7_16S_ribosomal_RNA_gene,_partial_sequence	gacgggtgagtaacgcgtgggaacgtaccctttactacggaataactcagggaaacttgtgctaataccgtatgtgttcgggggaaagattcggtaaaggatcggcccgcgttggattagctagttggtggggtaaaggcctaccaaggcgacgatccatagctggtctgagaggatgatcagccacattgggactgagacacggcccaaacccctacgggaggcagcagtggggaatattggacaatgggcgcaagcctgatccagccatgccgcgtgagtgttgaaggccctagggttgtaaagctctttcaccggtgaagaatgacggtaaccggagaagaagccccggctaacttcgtg-cagcagccgcggtaatacgaagggggctagcgttg…
Sinorhizobium_sp.	1842534	Sinorhizobium_sp._RAC02,_complete_sequence_16S	-------------------------------------------------------------------------------------------------------------------attagctagttggtggggtaaaggcctaccaaggcgacgatccatagctggtctgagaggatgatcagccacattgggactgagacacggcccaaactcctacgggaggcagcagtggggaatattggacaatgggcgcaagcctgatccagccatgccgcgtgagtgatgaaggccctagggttgtaaagctctttcaccggtgaagaatgacggtaaccggagaagaagccccggctaacttcgtgccagcagccgcggtaatacgaagggggctagcgttg…
Sphingobium_yanoikuyae	13690	Sphingobium_yanoikuyae_strain_IFO_15102_16S_ribosomal_RNA,_partial_sequence	cacgggtgcgtaacgcgtgggaatctgcccttgggttcggaataacttctggaaacggaagctaataccggatgatgtaggtccaaagattcgcccaaggatgagcccgcgtaggattagctagttggtgaggtaaaggctcaccaaggcgacgatccttagctggtctgagaggatgatcagccacactgggactgagacacggcccagactcctacgggaggcagcagtggggaatattggacaatgggcgaaagcctgatccagcaatgccgcgtgagtgatgaaggccttagggttgtaaagctcttttacccgggatgaatgacagtaccgggagaataagctccggctaactccgtgccagcagccgcggtaatacggagggagctagcgttg…
Staphylococcus_aureus	1280	Staphylococcus_aureus_subsp._anaerobius_strain_MVF-7_16S_ribosomal_RNA,_partial_sequence	gacgggtgagtaacacgtgataacctacctataagactgggataacttcgggaaaccggagctaataccggataatcaaaagtgaaagacgcacttatagatggatccgcgctgcattagctagttggtaaggtaacggcttaccaaggcaacgatgcatagccgacctgagagggtgatcggccacactggaactgagacacggtccagactcctacgggaggcagcagtagggaatcttccgcaatgggcgaaagcctgacggagcaacgccgcgtgagtgatgaaggtcttcggatcgtaaaactctgttattagggaagagtgacggtacctaatcagaaagccacggctaactacgtgccagcagccgcggtaatacgtaggtggcaagcgtta…
Staphylococcus_capitis	29388	Staphylococcus_capitis_strain_LK_499_16S_ribosomal_RNA,_partial_sequence	gacgggtgagtaacacgtgataacctacctataagactgggataacttcgggaaaccggagctaataccggataaccaacagtgaaagacgcacttatagatggatccgcgccgcattagctagttggtaaggtaacggcttaccaaggcaacgatgcgtagccgacctgagagggtgatcggccacactggaactgagacacggtccagactcctacgggaggcagcagtagggaatcttccgcaatgggcgaaagcctgacggagcaacgccgcgtgagtgaagaaggtcttcggatcgtaaaactctgttattagggaagagtgacggtacctaatcagaaagccacggctaactacgtgccagcagccgcggtaatacgtaggtggcaagcgtta…
Staphylococcus_caprae	29380	Staphylococcus_caprae_strain_ATCC_35538_16S_ribosomal_RNA,_partial_sequence	gacgggtgagtaacacgtgataacctacctataagactgggataacttcgggaaaccggagctaataccggataaccaacagtgaaagacgcacttatagatggatccgcgccgcattagctagttggtaaggtaacggcttaccaaggcaacgatgcgtagccgacctgagagggtgatcggccacactggaactgagacacggtccagactcctacgggaggcagcagtagggaatcttccgcaatgggcgaaagcctgacggagcaacgccgcgtgagtgaagaaggtcttcggatcgtaaaactctgttattagggaagagtgacggtacctaatcagaaagccacggctaactacgtgccagcagccgcggtaatacgtaggtggcaagcgtta…
Staphylococcus_chromogenes	46126	Staphylococcus_chromogenes_strain_CBCC_1462_16S_ribosomal_RNA,_partial_sequence	gacgggtgagtaacacgtggtaacctacctataagactggaataactccgggaaaccggggctaatgccggataaccgatagtgaaagacgcacttatagatggacccgcgccgtattagctagttggtgaggtaacggctcaccaaggcaacgatacgtagccgacctgagagggtgatcggccacactggaactgagacacggtccagactcctacgggaggcagcagtagggaatcttccgcaatgggcgaaagcctgacggagcaacgccgcgtgagtgatgaaggtcttcggatcgtaaagctctgttgttagggaagagtgacggtacctaaccagaaagccacggctaactacgtgccagcagccgcggtaatacgtaggtggcaagcgtta…
Staphylococcus_epidermidis	1282	Staphylococcus_epidermidis_strain_Fussel_16S_ribosomal_RNA,_partial_sequence	gacgggtgagtaacacgtgataacctacctataagactgggataacttcgggaaaccggagctaataccggataatcaatagtgaaagacgcacttatagatggatccgcgccgcattagctagttggtaaggtaacggcttaccaaggcaacgatgcgtagccgacctgagagggtgatcggccacactggaactgagacacggtccagactcctacgggaggcagcagtagggaatcttccgcaatgggcgaaagcctgacggagcaacgccgcgtgagtgatgaaggtcttcggatcgtaaaactctgttattagggaagagtgacggtacctaatcagaaagccacggctaactacgtgccagcagccgcggtaatacgtaggtggcaagcgtta…
Staphylococcus_equorum	246432	Staphylococcus_equorum_strain_C8025_16S_ribosomal_RNA_gene,_partial_sequence	gacgggtgagtaacacgtggtaacctacctataagactggaataacttcgggaaaccggagctaatgccggataacctaaagtaaaagatgcacttatagatggacccgcgccgtattagctagttggtaaggtaacggcttaccaaggcaacgatacgtagccgacctgagagggtgatcggccacactggaactgagacacggtccagactcctacgggaggcagcagtagggaatcttccgcaatggacgaaagtctgacggagcaacgccgcgtgagtgatgaaggttttcggatcgtaaaactctgttattagggaagagtgacggtacctaatcagaaagccacggctaactacgtgccagcagccgcggtaatacgtaggtggcaagcgtta…
Staphylococcus_haemolyticus	1283	Staphylococcus_haemolyticus_strain_SM_131_16S_ribosomal_RNA,_partial_sequence	gacgggtgagtaacacgtggtaacctacctataagactgggataacttcgggaaaccggagctaataccggataatcgatagtgaaagatgcacttatagatggacccgcgccgtattagctagttggtaaggtaacggcttaccaaggcgacgatacgtagccgacctgagagggtgatcggccacactggaactgagacacggtccagactcctacgggaggcagcagtagggaatcttccgcaatgggcgaaagcctgacggagcaacgccgcgtgagtgatgaaggtcttcggatcgtaaaactctgttattagggaagagtgacggtacctaatcagaaagccacggctaactacgtgccagcagccgcggtaatacgtaggtggcaagcgtta…
Staphylococcus_hominis	1290	Staphylococcus_hominis_strain_DM_122_16S_ribosomal_RNA,_partial_sequence	gacgggtgagtaacacgtggtaacctacctataagactgggataacttcgggaaaccggagctaataccggataatcgatagtgaaagatgcacttatagatggacctgcgccgtattagctagttggtaaggtaacggcttaccaaggcaacgatacgtagccgacctgagagggtgatcggccacactggaactgagacacggtccagactcctacgggaggcagcagtagggaatcttccgcaatgggcgaaagcctgacggagcaacgccgcgtgagtgatgaaggtcttcggatcgtaaaactctgttattagggaagagtgacggtacctaatcagaaagccacggctaactacgtgccagcagccgcggtaatacgtaggtggcaagcgtta…
Staphylococcus_muscae	1294	Staphylococcus_muscae_strain_MB4_16S_ribosomal_RNA,_partial_sequence	gacgggtgagtaacacgtggtaacctacctataagactggaataacttcgggaaaccggagctaatgccggataatcaatagtgaaagacgcacttatagatggacccgcgccgtattagctagttggtaaggtaacggcttaccaaggcgacgatacgtagccgacctgagagggtgatcggccacactggaactgagacacggtccagactcctacgggaggcagcagtagggaatcttccgcaatgggcgaaagcctgacggagcaacgccgcgtgagtgatgaaggtcttcggatcgtaaagctctgttattagggaagagtgacggtacctaatcagaaagccacggctaactacgtgccagcagccgcggtaatacgtaggtggcaagcgtta…
Staphylococcus_pasteuri	1276282	Staphylococcus_pasteuri_SP1;_CP004014	gacgggtgagtaacacgtgataacctacctataagactgggataacttcgggaaaccggagctaataccggataaccaatagtgaaaggcgcacttatagatggatccgcgccgtattagctagttggtaaggtgacggcttaccaaggcaacgatacgtagccgacctgagagggtgatcggccacactggaactgagacacggtccagactcctacgggaggcagcagtagggaatcttccgcaatgggcgaaagcctgacggagcaacgccgcgtgagtgatgaaggtcttcggatcgtaaaactctgttatcagggaagagtgacggtacctgatcagaaagccacggctaactacgtgccagcagccgcggtaatacgtaggtggcaagcgtta…
Staphylococcus_pseudintermedius	283734	Staphylococcus_pseudintermedius_strain_ON_86_16S_ribosomal_RNA,_partial_sequence	gacgggtgagtaacacgtggtaacctacctataagactggaataactccgggaaaccggggctaatgccggataacctacagtgaaagacgcacttatagatggacccgcgccgtattagctagttggtggggtaacggcctaccaaggcgacgatacgtagccgacctgagagggtgatcggccacactggaactgagacacggtccagactcctacgggaggcagcagtagggaatcttccgcaatgggcgaaagcctgacggagcaacgccgcgtgagtgatgaaggtcttcggatcgtaaagctctgttgttagggaagagtgacggtacctaaccagaaagccacggctaactacgtgccagcagccgcggtaatacgtaggtggcaagcgtta…
Staphylococcus_saprophyticus	29385	Staphylococcus_saprophyticus_subsp._bovis_strain_GTC_843_16S_ribosomal_RNA,_partial_sequence	gacgggtgagtaacacgtggtaacctacctataagactgggataacttcgggaaaccggagctaataccggataacctaaagtgaaagatgcacttatagatggacccgcgccgtattagctagttggtaaggtaacggcttaccaaggcgacgatacgtagccgacctgagagggtgatcggccacactggaactgagacacggtccagactcctacgggaggcagcagtagggaatcttccgcaatgggcgaaagcctgacggagcaacgccgcgtgagtgatgaagggtttcggctcgtaaaactctgttattagggaagagtgacggtacctaatcagaaagccacggctaactacgtgccagcagccgcggtaatacgtaggtggcaagcgtta…
Staphylococcus_schleiferi	1295	Staphylococcus_schleiferi_strain_DSM_4807_16S_ribosomal_RNA,_partial_sequence	gacgggtgagtaacacgtggtaacctacctataagactggaataactccgggaaaccggggctaatgccggataaccaacagtgaaagacgcacttatagatggacccgcgccgtattagctagttggtggggtaacggcctaccaaggcgacgatacgtagccgacctgagagggtgatcggccacactggaactgagacacggtccagactcctacgggaggcagcagtagggaatcttccgcaatgggcgaaagcctgacggagcaacgccgcgtgagtgatgaaggtcttcggatcgtaaagctctgttgttagggaagagtgacggcacctaaccagaaagccacggctaactacgtgccagcagccgcggtaatacgtaggtggcaagcgtta…
Staphylococcus_sciuri	1296	Staphylococcus_sciuri_strain_DSM_20345_16S_ribosomal_RNA,_partial_sequence	gacgggtgagtaacacgtggtaacctacctataagactgggataactccgggaaaccggggctaataccggataatcaatagtgaaagacgcacttatagatggacccgcgccgtattagctagttggtaaggtaacggcttaccaaggcgacgatacgtagccgacctgagagggtgatcggccacactggaactgagacacggtccagactcctacgggaggcagcagtagggaatcttccgcaatgggcgaaagcctgacggagcaacgccgcgtgagtgatgaaggtcttcggatcgtaaaactctgttgttagggaagagtgacggtacctaaccagaaagccacggctaactacgtgccagcagccgcggtaatacgtaggtggcaagcgtta…
Staphylococcus_warneri	1292	Staphylococcus_warneri_strain_AW_25_16S_ribosomal_RNA,_partial_sequence	gacgggtgagtaacacgtgataacctacctataagactgggataacttcgggaaaccggagctaataccggataaccaatagtgaaaggcgcacttatagatggatccgcgccgtattagctagttggtaaggtaacggcttaccaaggcaacgatacgtagccgacctgagagggtgatcggccacactggaactgagacacggtccagactcctacgggaggcagcagtagggaatcttccgcaatgggcgaaagcctgacggagcaacgccgcgtgagtgatgaaggtcttcggatcgtaaaactctgttatcagggaagagtgacggtacctgatcagaaagccacggctaactacgtgccagcagccgcggtaatacgtaggtggcaagcgtta…
Stenotrophomonas_maltophilia	40324	Stenotrophomonas_maltophilia_strain_ATCC_19861_16S_ribosomal_RNA,_partial_sequence	gacgggtgaggaatacatcggaatctactctgtcgtgggggataacgtagggaaacttacgctaataccgcatacgtacgggtgaaagcagcgcgattgaatgagccgatgtcggattagctagttggcggggtaaaggcccaccaaggcgacgatccgtagctggtctgagaggatgatcagccacactggaactgagacacggtccagactcctacgggaggcagcagtggggaatattggacaatgggcgcaagcctgatccagccataccgcgtgggtgaagaaggccttcgggttgtaaagcccttttgttgggaaagaatgacggtacccaaagaataagcaccggctaacttcgtgccagcagccgcggtaatacgaagggtgcaagcgtta…
Streptococcus_acidominimus	1326	Streptococcus_acidominimus_strain_LMG_17755_16S_ribosomal_RNA,_partial_sequence	aacgggtgagtaacgcgtggtaacctgcctggtagcgggggataactattggaaacgatagctaataccgcataataacatttaaaaggtgcactaccagatggacctgcgttgtattagctagtaggtaaggtaacggcttacctaggcgacgatacatagccgacctgagagggtgatcggccacactgggactgagacacggcccagactcctacgggaggcagcagtagggaatcttcggcaatggggggaaccctgaccgagcaacgccgcgtgagtgaagaaggttttcggatcgtaaagctctgttgtaagagaagagtgacggtaccttaccagaaagggacggctaactacgtgccagcagccgcggtaatacgtaggtcccgagcgttg…
Streptococcus_agalactiae	1311	Streptococcus_agalactiae;_ATCC_13813;_DQ303183	aacgggtgagtaacgcgtggtaacctgcctcatagcgggggataactattggaaacgatagctaataccgcataaggttatttaaaaggagcactgtgagatggacctgcgttgtattagctagttggtgaggtaaaggctcaccaaggcgacgatacatagccgacctgagagggtgatcggccacactgggactgagacacggcccagactcctacgggaggcagcagtagggaatcttcggcaatggacggaagtctgaccgagcaacgccgcgtgagtgaagaaggttttcggatcgtaaagctctgttgttagagaagagtgacggtaactaaccagaaagggacggctaactacgtgccagcagccgcggtaatacgtaggtcccgagcgttg…
Streptococcus_anginosus	1328	Streptococcus_anginosus_16S_ribosomal_RNA,_partial_sequence	aacgggtgagtaacgcgtggtaacctgcctattagagggggataactattggaaacgatagctaataccgcataacgatgcttgaaagatgcgctagtagatggacctgcgttgtattagctagtaggtagggtaatggcctacctaggcgacgatacatagccgacctgagagggtgatcggccacactgggactgagacacggcccagactcctacgggaggcagcagtagggaatcttcggcaatggggggaaccctgaccgagcaacgccgcgtgagtgaagaaggttttcggatcgtaaagctctgttgttaaggaagaatgacggtacttaaccagaaagggacggctaactacgtgccagcagccgcggtaatacgtaggtcccgagcgttg…
Streptococcus_australis	113107	Streptococcus_australis_strain_AI-1_16S_ribosomal_RNA,_partial_sequence	aacgggtgagtaacgcgtggtaacctgcctggtagcgggggataactattggaaacgatagctaataccgcataactytgcttgaaaggggcactaccagatggacctgcgttgtattagctagttggtgaggtaacggctcaccaaggcgacgatacatagccgacctgagagggtgatcggccacactgggactgagacacggcccagactcctacgggaggcagcagtagggaatcttcggcaatggacggaagtctgaccgagcaacgccgcgtgagtgaagaaggttttcggatcgtaaagctctgttgtaagagaagagtgacggtatcttaccagaaagggacggctaactacgtgccagcagccgcggtaatacgtaggtcccgagcgtta…
Streptococcus_canis	1329	Streptococcus_canis_strain_STR_T1_16S_ribosomal_RNA,_partial_sequence	aacgggtgagtaacgcgtggtaacctacctgatagcgggggataactattggaaacgatagctaataccgcataaaagaacttaaaaggggcactatgagatggacctgcgttgtattagctagttggtgaggtaaaggctcaccaaggcgacgatacatagccgacctgagagggtgatcggccacactgggactgagacacggcccagactcctacgggaggcagcagtagggaatcttcggcaatggggggaaccctgaccgagcaacgccgcgtgagtgaagaaggttttcggatcgtaaagctctgttgttagagaagagtgacggtaactaaccagaaagggacggctaactacgtgccagcagccgcggtaatacgtaggtcccgagcgttg…
Streptococcus_constellatus	184250	Streptococcus_constellatus_subsp._pharyngis_strain_MM9889a_16S_ribosomal_RNA,_partial_sequence	aacgggtgagtaacgcgtggtaacctgcctggtagcgggggataactattggaaacgatagctaataccgtataaggatgtttaaaaggtgcactaccagatggacctgcgttgtattagctagttggtgaggtaacggctcaccaaggcaacgatacatagccgacctgagagggtgatcggccacactgggactgagacacggcccagactcctacgggaggcagcagtagggaatcttcggcaatggggggaaccctgaccgagcaacgccgcgtgagtgaagaaggttttcggatcgtaaagctctgttgttaaggaagagtgacggtacttaaccagaaagggacggctaactacgtgccagcagccgcggtaatacgtaggtcccgagcgttg…
Streptococcus_cristatus	45634	Streptococcus_cristatus_strain_2-Apr_16S_ribosomal_RNA,_partial_sequence	aacgggtgagtaacgcgtggtaacctaccttttagcgggggataactattggaaacgatagctaataccgcataagagatgttaaaagatgcactaagagatggacctgcgttgtattagctagtaggtgaggtaacggctcacctaggcgacgatacatagccgacctgagagggtgatcggccacactgggactgagacacggcccagactcctacgggaggcagcagtagggaatcttcggcaatggacggaagtctgaccgagcaacgccgcgtgagtgaagaaggttttcggatcgtaaagctctgttgtaagagaagagtgacggtaacttaccagaaagggacggctaactacgtgccagcagccgcggtaatacgtaggtcccgagcgttg…
Streptococcus_dysgalactiae	1334	Streptococcus_dysgalactiae_strain_ATCC_43078_16S_ribosomal_RNA,_partial_sequence	aacgggtgagtaacgcgtggtaacctacctcatagcgggggataactattggaaacgatagctaataccgcatgacttcatttgaaaggtgcactatgagatggacctgcgttgtattagctagttggtgaggtaacggctcaccaaggcgacgatacatagccgacctgagagggtgaacggccacactgggactgagacacggcccagactcctacgggaggcagcagtagggaatcttcggcaatggacggaagtctgaccgagcaacgccgcgtgagtgaagaaggttttcggatcgtaaagctctgttgttagagaagagtgacggtaactaaccagaaagggacggctaactacgtgccagcagccgcggtaatacgtaggtcccgagcgttg…
Streptococcus_equi	148942	Streptococcus_equi_subsp._equi;_Bd_30/98;_EF405986	aacgggtgagtaacgcgtggtaacctagcttatagcgggggataactattggaaacgatagctaataccgcataaaaccatttaaaaggagcactatgagatggacctgcgttgtattagctagttggtagggtaaaggcctaccaaggcgacgatacatagccgacctgagagggtgaacggccacactgggactgagacacggcccagactcctacgggaggcagcagtagggaatcttcggcaatggggggaaccctgaccgagcaacgccgcgtgagtgaagaaggttttcggatcgtaaagctctgttgttagagaagagtgacggtaactaaccagaaagggacggctaactacgtgccagcagccgcggtaatacgtaggtcccgagcgttg…
Streptococcus_equinus	1335	Streptococcus_equinus_strain_NBRC_12553_16S_ribosomal_RNA,_partial_sequence	aacgggtgagtaacgcgtggtaacctgcctactagcgggggataactattggaaacgatagctaataccgcataacgatgcttgaaagaagcactagtagatggacctgcgttgtattagctagttggtgaggtaaaggctcaccaaggcgacgatacatagccgacctgagagggtgatcggccacactgggactgagacacggcccagactcctacgggaggcagcagtagggaatcttcggcaatgggggcaaccctgaccgagcaacgccgcgtgagtgaagaaggttttcggatcgtaaagctctgttgtaagagaagagtgacggtaacttaccagaaagggacggctaactacgtgccagcagccgcggtaatacgtaggtcccgagcgttg…
Streptococcus_gallolyticus	990317	Streptococcus_gallolyticus_subsp._gallolyticus_ATCC_BAA-2069;_FR824043	aacgggtgagtaacgcgtggtaacctgcctactagcgggggataactattggaaacgatagctaataccgcataacgatgcttgaaagatgcactagtagatggacctgcgttgtattagctagttggtggggtaacggcctaccaaggcgacgatacatagccgacctgagagggtgatcggccacactgggactgagacacggcccagactcctacgggaggcagcagtagggaatcttcggcaatgggggcaaccctgaccgagcaacgccgcgtgagtgaagaaggttttcggatcgtaaagctctgttgtaagagaagagtgacggtaacttaccagaaagggacggctaactacgtgccagcagccgcggtaatacgtaggtcccgagcgttg…
Streptococcus_gordonii	1302	Streptococcus_gordonii_strain_SK3_16S_ribosomal_RNA,_partial_sequence	aacgggtgagtaacgcgtggtaacctgcctggtagcgggggataactattggaaacgatagctaataccgcataatattaattgaaaggtgcactaccagatggacctgcgttgtattagctagtaggtgaggtaacggctcacctaggcgacgatacatagccgacctgagagggtgatcggccacactgggactgagacacggcccagactcctacgggaggcagcagtagggaatcttcggcaatggacgaaagtctgaccgagcaacgccgcgtgagtgaagaaggttttcggatcgtaaagctctgttgtaagagaagagtgacggtatcttaccagaaagggacggctaactacgtgccagcagccgcggtaatacgtaggtcccgagcgttg…
Streptococcus_iniae	1346	Streptococcus_iniae_strain_ATCC_29178_16S_ribosomal_RNA,_partial_sequence	aacgggtgagtaacgcgtggtaacctacctcatagcgggggataactattggaaacgatagctaataccgcatgacttaatttaaaaggagcactatgagatggacctgcgttgtattagctagttggtgaggtaacggctcaccaaggcgacgatacatagccgacctgagagggtgatcggccacactgggactgagacacggcccagactcctacgggaggcagcagtagggaatcttcggcaatggacggaagtctgaccgagcaacgccgcgtgagtgaagaaggttttcggatcgtaaagctctgttgttagagaagagtgacggtaactaaccagaaagggacggctaactacgtgccagcagccgcggtaatacgtaggtctcgagcgttg…
Streptococcus_intermedius	1338	Streptococcus_intermedius_strain_1877_16S_ribosomal_RNA,_partial_sequence	aacgggtgagtaacgcgtggtaacctgcctggtagcgggggataactattggaaacgatagctaataccgcataaggatgtttaaaaggtgcactaccagatggacctgcgttgtattagctagtaggtgaggtaacggctcacctaggcgacgatacatagccgacctgagagggtgatcggccacactgggactgagacacggcccagactcctacgggaggcagcagtagggaatcttcggcaatggggggaaccctgaccgagcaacgccgcgtgagtgaagaaggttttcggatcgtaaagctctgttgttaaggaagaatgacggtacttaaccagaaagggacggctaactacgtgccagcagccgcggtaatacgtaggtcccgagcgttg…
Streptococcus_marmotae	1825069	Streptococcus_marmotae_strain_HTS5_16S_ribosomal_RNA,_partial_sequence	aacgggtgagtaacgcgtggtaacctgcctggtagcgggggataactattggaaacgatagctaataccgcataagagcatttaaaagatgcactaccagatggacctgcgttgtattagctagttggtggggtaacggctcaccaaggcgacgatacatagccgacctgagagggtgatcggccacactgggactgagacacggcccagactcctacgggaggcagcagtagggaatcttcggcaatgggggcaaccctgaccgagcaacgccgcgtgagtgaagaaggttttcggatcgtaaagctctgttgtaagagaagagtgacggtatcttaccagaaagggacggctaactacgtgccagcagccgcggtaatacgtaggtcccgagcgttg…
Streptococcus_merionis	400065	Streptococcus_merionis_strain_WUE3771_16S_ribosomal_RNA,_partial_sequence	aacgggtgagtaacgcgtggtaacctgcctggtagcgggggataactattggaaacgatagctaataccgcataagggagcttaaaagaagcactaccagatggacctgcgttgtattagctagttggtagggtaacggcctaccaaggcgacgatacatagccgacctgagagggtgatcggccacactgggactgagacacggcccagactcctacgggaggcagcagtagggaatcttcggcaatggggggaaccctgaccgagcaacgccgcgtgagtgaagaaggttttcggatcgtaaagctctgttgtaagagaagagtgacggtaacttaccagaaagggacggctaactacgtgccagcagccgcggtaatacgtaggtcccgagcgttg…
Streptococcus_milleri	33040	Streptococcus_milleri;_SJMC;_X81023	aacgggtgagtaacgcgtggtaacctacctattagagggggataactattggaaacgatagctaataccgcataacgatgcttgaaagatgcgctagtagatggacctgcgttgtattagctagtaggtagggtaatggcctacctaggcaacgatacatagccgacctgagagggtgatcggccacactgggactgagacacggcccagactcctacgggaggcagcagtagggaatcttcggcaatggggggaaccctgaccgagcaacgccgcgtgagtgaagaaggttttcggatcgtaaagctctgttgttaaggaagaatgacggtacttaaccagaaagggacggctaactacgtgccagcagccgcggtaatacgtaggtcccgagcgttg…
Streptococcus_mitis	28037	Streptococcus_mitis_strain_NS51_16S_ribosomal_RNA,_partial_sequence	aacgggtgagtaacgcgtggtaacctgcctggtagcgggggataactattggaaacgatagctaataccgcataagtttgcttaaaaggtgcactaccagatggacctgcgttgtattagctagttggtggggtaacggctcaccaaggcgacgatacatagccgacctgagagggtgatcggccacactgggactgagacacggcccagactcctacgggaggcagcagtagggaatcttcggcaatggacggaagtctgaccgagcaacgccgcgtgagtgaagaaggttttcggatcgtaaagctctgttgtaagagaagagtgacggtatcttaccagaaagggacggctaactacgtgccagcagccgcggtaatacgtaggtcccgagcgttg…
Streptococcus_mutans	1309	Streptococcus_mutans_strain_ATCC_25175_16S_ribosomal_RNA,_partial_sequence	aacgggtgagtaacgcgtggtaacctgcctattagcgggggataactattggaaacgatagctaataccgcataatattgattgaaagatgcactagtagatggacctgcgttgtattagctagttggtaaggtaagagcttaccaaggcgacgatacatagccgacctgagagggtgatcggccacactgggactgagacacggcccagactcctacgggaggcagcagtagggaatcttcggcaatggacgaaagtctgaccgagcaacgccgcgtgagtgaagaaggttttcggatcgtaaagctctgttgtaagtcaagagtgacggtagcttaccagaaagggacggctaactacgtgccagcagccgcggtaatacgtaggtcccgagcgttg…
Streptococcus_oralis	1303	Streptococcus_oralis_strain_CCUG_24891_16S_ribosomal_RNA,_partial_sequence	aacgggtgagtaacgcgtggtaacctgcctggtagcgggggataactattggaaacgatagctaataccgcataagtttacttaaaaggtgcactaccagatggacctgcgttgtattagctagttggtgaggtaacggctcaccaaggcaacgatacatagccgacctgagagggtgatcggccacactgggactgagacacggcccagactcctacgggaggcagcagtagggaatcttcggcaatggacggaagtctgaccgagcaacgccgcgtgagtgaagaaggttttcggatcgtaaagctctgttgtaagagaagagtgacggtatcttaccagaaagggacggctaactacgtgccagcagccgcggtaatacgtaggtcccgagcgttg…
Streptococcus_parasanguinis	760570	Streptococcus_parasanguinis_ATCC_15912_16S_ribosomal_RNA,_partial_sequence	aacgggtgagtaacgcgtggtaacctgcctcttagcgggggataactattggaaacgatagctaataccgcataaattgacttgaaaggtgcactaagagatggacctgcgttgtattagctagttggtgaggtaacggctcaccaaggcgacgatmcatagccgacctgagagggtgatcggccacactgggactgagacacggcccagactcctacgggaggcagcagtagggaatcttcggcaatggacggaagtctgaccgagcaacgccgcgtgagtgaagaaggttttcggatcgtaaagctctgttgtaagagaagagtgacggtaacttaccagaaagggacggctaactacgtgccagcagccgcggtaatacgtaggtcccgagcgttr…
Streptococcus_parauberis	1348	Streptococcus_parauberis_strain_DSM_6631_16S_ribosomal_RNA,_partial_sequence	aacgggtgagtaacgcgtggtaacctaccttatagcgggggataactattggaaacgatagctaataccgcatgactaaatttaaaaggagcactatgagatggacctgcgttgtattagctagttggtgaggtaacggctcaccaaggccacgatacatagccgacctgagagggtgatcggccacactgggactgagacacggcccagactcctacgggaggcagcagtagggaatcttcggcaatgggggcaaccctgaccgagcaacgccgcgtgagtgaagaaggttttcggatcgtaaagctctgttgttagagaagagtgacggtaactaaccagaaagggacggctaactacgtgccagcagccgcggtaatacgtaggtctcgagcgttg…
Streptococcus_pneumoniae	1313	Streptococcus_pneumoniae_strain_ATCC_33400_16S_ribosomal_RNA,_partial_sequence	aacgggtgagtaacgcgtggtaacctgcctggtagcgggggataactattggaaacgatagctaataccgcataagtttgcttaaaaggtgcactaccagatggacctgcgttgtattagctagttggtggggtaacggctcaccaaggcgacgatacatagccgacctgagagggtgatcggccacactgggactgagacacgkcccagactcctacgggaggcagcagtagggaatcttcggcaatggacggaagtctgaccgagcaacgccgcgtgagtgaagaaggttttcggatcgtaaagctctgttgtaagagaagagtgacggtatcttaccagaaagggacggctaactacgtgccagcagccgcggtaatacgtaggtcccgagcgttg…
Streptococcus_porcinus	1340	Streptococcus_porcinus_strain_176_16S_ribosomal_RNA,_partial_sequence	aacgggtgagtaacgcgtggtaacctaccttatagcgggggataactattggaaacgatagctaataccgcatgaatctacttaaaaggggcactatgagatggacctgcgttgtattagctagttggtgaggtaaaggctcaccaaggcgacgatacatagccgacctgagagggtgatcggccacactgggactgagacacggcccagactcctacgggaggcagcagtagggaatcttcggcaatggggggaaccctgaccgagcaacgccgcgtgagtgaagaaggttttcggatcgtaaagctctgttgttagagaagagtgacggtaactaaccagaaagggacggctaactacgtgccagcagccgcggtaatacgtaggtcccgagcgttg…
Streptococcus_pseudopneumoniae	1054460	Streptococcus_pseudopneumoniae_IS7493,_complete_genome_16S	aacgggtgagtaacgcgtggtaacctgcctggtagcgggggataactattggaaacgatagctaataccgcataagtttgcttaaaaggtgcactaccagatggacctgcgttgtattagctagttggtggggtaacggctcaccaaggcgacgatacatagccgacctgagagggtgatcggccacactgggactgagacacggcccagactcctacgggaggcagcagtagggaatcttcggcaatggacggaagtctgaccgagcaacgccgcgtgagtgaagaaggttttcggatcgtaaagctctgttgtaagagaagagtgacggtatcttaccagaaagggacggctaactacgtgccagcagccgcggtaatacgtaggtcccgagcgttg…
Streptococcus_pyogenes	1314	Streptococcus_pyogenes_strain_I-273_16S_ribosomal_RNA,_partial_sequence	aacgggtgagtaacgcgtggtaacctacctcatagcgggggataactattggaaacgatagctaataccgcataaggtaatttaaaaggggcactatgagatggacctgcgttgtattagctagttggtgaggtaaaggctcaccaaggcgacgatacatagccgacctgagagggtgatcggccacactgggactgagacacggcccagactcctacgggaggcagcagtagggaatcttcggcaatgggggcaaccctgaccgagcaacgccgcgtgagtgaagaaggttttcggatcgtaaagctctgttgttagagaagagtgacggtaactaaccagaaagggacggctaactacgtgccagcagccgcggtaatacgtaggtcccgagcgttg…
Streptococcus_respiraculi	2021971	Streptococcus_respiraculi_strain_HTS25_16S_ribosomal_RNA_gene,_partial_sequence	aacgggtgagtaacgcgtggtaacctgcctggtagcgggggataactattggaaacgatagctaataccgcataaaagtatttgaaaggtgcactaccagatggacctgcgttgtattagctagttggtgaggtaacggctcaccaaggcgacgatacatagccgacctgagagggtgatcggccacactgggactgagacacggcccagactcctacgggaggcagcagtagggaatcttcggcaatggggggaaccctgaccgagcaacgccgcgtgagtgaagaaggttttcggatcgtaaagctctgttgtaagagaagagtgacggtaacttaccagaaagggacggctaactacgtgccagcagccgcggtaatacgtaggtcccgagcgttg…
Streptococcus_salivarius	1304	Streptococcus_salivarius_strain_ATCC_7073_16S_ribosomal_RNA,_partial_sequence	aacgggtgagtaacgcgtggtaacctgccttgtagcgggggataactattggaaacgatagctaataccgcataactttatttgaaaggggcactacaagatggacctgcgttgtattagctagtaggtgaggtaacggctcacctaggcgacgatacatagccgacctgagagggtgatcggccacactgggactgagacacggcccagactcctacgggaggcagcagtagggaatcttcggcaatgggggcaaccctgaccgagcaacgccgcgtgagtgaagaaggttttcggatcgtaaagctctgttgtaagtcaagagtgacggtagcttaccagaaagggacggctaactacgtgccagcagccgcggtaatacgtaggtcccgagcgttg…
Streptococcus_sanguinis	1305	Streptococcus_sanguinis_strain_JCM_5708_16S_ribosomal_RNA,_partial_sequence	aacgggtgagtaacgcgtggtaacctgcctggtagcgggggataactattggaaacgatagctaataccgcataaaattaattgaaagatgcactaccagatggacctgcgttgtattagctagttggtgaggtaacggctcaccaaggcgacgatacatagccgacctgagagggtgatcggccacactgggactgagacacggcccagactcctacgggaggcagcagtagggaatcttcggcaatggggggaaccctgaccgagcaacgccgcgtgagtgaagaaggttttcggatcgtaaagctctgttgtaagagaagagtgacggtatcttaccagaaagggacggctaactacgtgccagcagccgcggtaatacgtaggtcccgagcgttg…
Streptococcus_sp.	2598453	Streptococcus_sp._116-D4_chromosome,_complete_genome_16S	aacgggtgagtaacgcgtggtaacctgcctggtagtgggggataactattggaaacgatagctaataccgcataattttgcttaaaaggtgcactaccagatggacctgcgttgtattagctagttggtgaggtaacggctcaccaaggcaacgatacatagccgacctgagagggtgatcggccacactgggactgagacacggcccagactcctacgggaggcagcagtagggaatcttcggcaatggacggaagtctgaccgagcaacgccgcgtgagtgaagaaggttttcggatcgtaaagctctgttgtaagagaagagtgacggtatcttaccagaaagggacggctaactacgtgccagcagccgcggtaatacgtaggtcccgagcgttg…
Streptococcus_suis	1307	Streptococcus_suis_strain_S735_16S_ribosomal_RNA,_partial_sequence	aacgggtgagtaacgcgtggtaacctgcctcatagcgggggataactattggaaacgatagctaataccgcataacgatatttgaaaggagcactatgagatggacctgcgttgtattagctagttggtgaggtaacggctcaccaaggcttcgatacatagccgacctgagagggtgatcggccacactgggactgagacacggcccagactcctacgggaggcagcagtagggaatcttcggcaatgggggcaaccctgaccgagcaacgccgcgtgagtgaagaaggttttcggatcgtaaagctctgttgtaagagaagagtgacggtatcttaccagaaagggacggctaactacgtgccagcagccgcggtaatacgtaggtcccgagcgttg…
Streptococcus_thermophilus	1308	Streptococcus_thermophilus_strain_ATCC_19258_16S_ribosomal_RNA,_partial_sequence	aacgggtgagtaacgcgtggtaacctgccttgtagcgggggataactattggaaacgatagctaataccgcataactttatttgaaaggggcactacaagatggacctgcgttgtattagctagtaggtgaggtaatggctcacctaggcgacgatacatagccgacctgagagggtgatcggccacactgggactgagacacggcccagactcctacgggaggcagcagtagggaatcttcggcaatgggggcaaccctgaccgagcaacgccgcgtgagtgaagaaggttttcggatcgtaaagctctgttgtaagtcaagagtgacggtagcttaccagaaagggacggctaactacgtgccagcagccgcggtaatacgtaggtcccgagcgttg…
Streptococcus_urinalis	149016	Streptococcus_urinalis_strain_2285-97_16S_ribosomal_RNA_gene,_partial_sequence	aacgggtgagtaacgcgtggtaacctgcctcatagcgggggataactattggaaacgatagctaataccgcatgagggaacttaaaaggagcactatgagatggacctgcgttgtattagctagttggtgaggtaacggctcaccaaggcgacgatacatagccgacctgagagggtgatcggccacactgggactgagacacggcccagactcctacgggaggcagcagtagggaatcttcggcaatgggggcaaccctgaccgagcaacgccgcgtgagtgaagaaggttttcggatcgtaaagctctgttgttagagaagagtgacggtaactaaccagaaagggacggctaactacgtgccagcagccgcggtaatacgtaggtcccgagcgttg…
Streptococcus_vestibularis	1343	Streptococcus_vestibularis;_NCTC_12166(T);_X58321	aacgggtgagtnacgcgtggtnacctncctagtagcgggggataactnttggaaacgatagctnataccgcataactnnntttgaaaggggcactacnagatggacctncgtngtattagctngtaggtgaggtaacggctcacctaggcgacgatacatagccgacctgagagggtnatcggccacactgggactgagacacggcccngactcctacgggaggcagcngtagggaatcttcggcnatgggggnaaccctgaccgagcaacgccgcgtgagtgaagaaggttttcggatcgtaaagctctgttgtaagtcaagagtgacggtagcttaccagaaagggacggctaactacgtgccagcagccgcggtaatacgtaggtcccnagcgttg…
Streptococcus_viridans	78535	Streptococcus_viridans_strain_NCTC1080_genome_assembly,_contig:_ERS846866SCcontig000001,_whole_genome_shotgun_sequence_16S	---------------------------------------------------------------------------------------------------gatggacctgcgttgtattagctagtaggtagggtaatggcctacctaggcgacgatacatagccgacctgagagggtgatcggccacactgggactgagacacggcccagactcctacgggaggcagcagtagggaatcttcggcaatggggggaaccctgaccgagcaacgccgcgtgagtgaagaaggttttcggatcgtaaagctctgttgttaaggaagaatgacggtacttaaccagaaagggacggctaactacgtgccagcagccgcggtaatacgtaggtcccgagcgttg…
Streptomyces_venezuelae	54571	Streptomyces_venezuelae_strain_JCM_4526_16S_ribosomal_RNA,_partial_sequence	aacgggtgagtaacacgtggcaatctgcccttcactctgggacaagccctggaaacggggtctaataccggataacgctggttgaaagctccggtgaaggatgagcccgcggcctatcagcttgttggtggggtaatggcctaccaaggcgacgacgggtagccggcctgagagggcgaccggccacactgggactgagacacggcccagactcctacgggaggcagcagtggggaatattgcacaatgggcgaaagcctgatgcagcgacgccgcgtgagggatgacggccttcgggttgtaaacctctttcagcagggaagagtgacggtacctgcagaagaagcgccggctaactacgtgccagcagccgcggtaatacgtagggcgcaagcgttg…
Syntrophobotulus_glycolicus	645991	Syntrophobotulus_glycolicus_DSM_8271;_CP002547	aacgggtgagtaacgcgtggtaacctgtcctcatgaccggaataacagttggaaacgactgctaatgccggataagccggaaggaaagctgtgcaagagggtggacccgcgtctgattagctggttggtagagtaaaagcctaccaaggcgacgatcagtagccggcctgagagggtaaacggccacactgggactgagacacggcccagactcctacgggaggcagcagtggggaatcttccgcaatggacgaaagtctgacggagcaacgccgcgtgtatgaagaaggctttcgggttgtaaagtactgttgtcagggacgactgacggtacctgacgaggaagccccggctaactacgtgccagcagccgcggtaatacgtagggggcgagcgttg…
Tannerella_sp._oral_taxon_HOT-286	712710	Tannerella_sp._oral_taxon_286_clone_WWP_SS7_C16_16S_ribosomal_RNA_gene,_partial_sequence	cacgggtgagtaacgcgttgcaacctacctacaacagaagaataatccggcgaaagtcggtctaatacttcataaatatttgttaaagattcggttgtagatgggcatgcgtaccattaggtagttggtgaggtaacggcccaccaagcctacgatggttaggggttctgagaggaaagtcccccacactggtactgagacacggaccagactcctacgggaggcagcagtgaggaatattggtcaatgggcgagagcctgaaccagccaagtcgcgtgaaggatgacggcctatgggttgtaaacttcttttgcaggggaatattgtatgtaccctgcgaataagcatcggctaactccgtgccagcagccgcggtaatacggaggatgcgagcgtta…
Tenacibaculum_todarodis	1850252	Tenacibaculum_todarodis_strain_LPB0136_16S_ribosomal_RNA_gene,_partial_sequence	cacgggtgcgtaacgcgttagaatctgccttgtacaggaggatagcctttagaaatgaagattaatactccataatttttaattaaagattcggtacaagatgactatgcgtcctattagctagatggtgaggtaacggcttaccatggcaacgataggtaggggtcctgagagggagatcccccacactggtactgagacacggaccagactcctacgggaggcagcagtgaggaatattgggcaatggaggcaactctgacccagccatgccgcgtgcaggaagacggcctatgggttgtaaactgcttttatacaggaagattgacggtactgtaagaataagcaccggctaactccgtgccagcagccgcggtaatacggagggtgcaagcgtta…
Vagococcus_penaei	633807	Vagococcus_penaei_strain_CD276_16S_ribosomal_RNA,_partial_sequence	gacgggtgagtaacacgtggcaacctgcccatcagagggggataacacttggaaacaggtgctaataccgcataatacaggataaaagacgcactggtggatgggcccgcggtgcattagttagttggtggggtaacggcctaccaagaccatgatgcatagccgacctgagagggtgatcggccacactgggactgagacacggcccagactcctacgggaggcagcagtagggaatcttcggcaatggacgaaagtctgaccgagcaacgccgcgtgagtgaagaaggttttcggatcgtaaaactctgttgttagagaagagtgacggtatctaaccagaaagccacggctaactacgtgccagcagccgcggtaatacgtaggtggcaagcgttg…
Veillonella_atypica	39777	Veillonella_atypica_strain_KON_16S_ribosomal_RNA,_partial_sequence	aacgggtgagtaacgcgtatcaacctgcccttcagagggggacaacagttggaaacgactgctaataccgcatacgactggatgaaaggtgcactgaaggaggggattgcgtctgattagctagttggaggggtaacggcccaccaaggcgatgatcagtagccggtctgagaggatgaacggccacattgggactgagacacggcccagactcctacgggaggcagcagtggggaatcttccgcaatggacgaaagtctgacggagcaacgccgcgtgagtgatgacggccttcgggttgtaaagctctgttaatcgggacgattgacggtaccggaatagaaagccacggctaactacgtgccagcagccgcggtaatacgtaggtggcaagcgttg…
Veillonella_dispar	39778	Veillonella_dispar_strain_ATCC_17748_16S_ribosomal_RNA,_partial_sequence	aacgggtgagtaacgcgtatcaacctgcccttcagagggggacaacagttggaaacgactgctaataccgcatacggatggatgaaaggtgcactgaaggaggggattgcgtctgattagctagttggaggggtaacggcccaccaaggcgatgatcagtagccggtctgagaggatgaacggccacattgggactgagacacggcccagactcctacgggaggcagcagtggggaatcttccgcaatggacgaaagtctgacggagcaacgccgcgtgagtgatgacggccttcgggttgtaaagctctgttaatcgggacgattgacggtaccggaatagaaagccacggctaactacgtgccagcagccgcggtaatacgtaggtggcaagcgttg…
Veillonella_parvula	29466	Veillonella_parvula_strain_JCM_12972_16S_ribosomal_RNA,_partial_sequence	aacgggtgagtaacgcgtatcaacctgcccttcagagggggacaacagttggaaacgactgctaataccgcatacggaaagatgaaaggtgcactgaaggaggggattgcgtctgattagctagttggaggggtaacggcccaccaaggcgatgatcagtagccggtctgagaggatgaacggccacattgggactgagacacggcccagactcctacgggaggcagcagtggggaatcttccgcaatggacgaaagtctgacggagcaacgccgcgtgagtgatgacggccttcgggttgtaaagctctgttaatcgggacgattgacggtaccggaatagaaagccacggctaactacgtgccagcagccgcggtaatacgtaggtggcaagcgttg…
Veillonella_rodentium	248315	Veillonella_rodentium_strain_ATCC_17743_16S_ribosomal_RNA,_partial_sequence	-------------cgcgtatcaacctgcccttccaggggga--aacagttggaaacgactgctaataccgcatacggatggatgaaaggtgcactgaaggaggggattgcgtctgattagctagttggaggggtaacggcccaccaaggcgatgatcagtagccggtctgagaggatgaacggccacattgggactgagacacggcccagactcctacgggaggcagcagtggggaatcttccgcaatggacgaaagtctgacggagcaacgccgcgtgagtgatgacggccttcgggttgtaaagctctgttaatcgggacgattgacggtaccggaatagaaagccacggctaactacgtgccagcagccgcggtaatacgtaggtggcaagcgttg…
Yersinia_enterocolitica	1262462	Yersinia_enterocolitica_(type_O:5)_str._YE53/03_isolate_host_faecal_sample_chromosome,_complete_genome_16S	gacgggtgagtaatgtctgggaaactgcctgatggagggggataactactggaaacggtagctaataccgcataacttcggaccaaagtggcgccatcggatgtgcccagatgggattagctagtaggtggggtaatggctcacctaggcgacgatccctagctggtctgagaggatgaccagccacactggaactgagacacggtccagactcctacgggaggcagcagtggggaatattgcacaatgggcgcaagcctgatgcagccatgccgcgtgtgtgaagaaggccttcgggttgtaaagcactttcagcgaggaggaatgacgttactcgcagaagaagcaccggctaactccgtgccagcagccgcggtaatacggagggtgcaagcgtta…
Yersinia_massiliensis	419257	Yersinia_massiliensis_strain_50640_16S_ribosomal_RNA,_partial_sequence	gacgggtgagtaatgtctggggatctgcctgatggagggggataactactggaaacggtagctaataccgcatgacgaaagagcaaagtggcgccatcggatgaacccagatgggattagctagtaggtggggtaatggctcacctaggcgacgatccctagctggtctgagaggatgaccagccacactggaactgagacacggtccagactcctacgggaggcagcagtggggaatattgcacaatgggcgcaagcctgatgcagccatgccgcgtgtgtgaagaaggccttcgggttgtaaagcactttcagcgaggaggaatgacgttactcgcagaagaagcaccggctaactccgtgccagcagccgcggtaatacggagggtgcaagcgtta…
Clostridium_hiranonis	89152	[Clostridium]_hiranonis_strain_TO-931_16S_ribosomal_RNA,_partial_sequence	gacgggtgagtaacgcgtggtaacctgccctgtacacacggataacataccgaaaggtatgctaatacgggataattttatatcaaagattcggtacaggatggacccgcgtctgattagcttgttggcggggtaacggcccaccaaggcgacgatcagtagccgacctgagagggtgatcggccacattggaactgagacacggtccaaactcctacgggaggcagcagtggggaatattgcacaatgggcgcaagcctgatgcagcaacgccgcgtgagcgatgaaggccttcgggtcgtaaagctctgtcctcaaggaagaatgacggtacttgaggaggaagccccggctaactacgtgccagcagccgcggtaatacgtagggggctagcgtta…
Clostridium_sphenoides	1297793	[Clostridium]_sphenoides_JCM_1415_strain_ATCC_19403_16S_ribosomal_RNA,_partial_sequence	gacgggtgagtaacgcgtggtaacctgcctcatacagggggataacagtcggaaacgactgctaataccgcataagcggtgtgaaaaactctggtatgagatggacccgcgtctgattaggtagttggtgaggtaacggcccaccaagccgacgatcagtagccgacctgagagggtgaccggccacattgggactgagacacggcccaaactcctacgggaggcagcagtggggaatattggacaatgggggaaaccctgatccagcgacgccgcgtgagtgaagaagtatttcggtatgtaaagctctatcagcagggaagaatgacggtacctgactaagaagccccggctaacbacgtgccagcagccgcggtaatacgtagggggcaagcgtta…
Eubacterium_eligens	515620	[Eubacterium]_eligens_ATCC_27750_16S_ribosomal_RNA,_partial_sequence	gacgggtgagtaacgcgtggtaacctgccttgtactgggggatagcagctggaaacggctggtaataccgcataagtggtgtgaaaaactctggtataagatggacccgcgtctgattagctagttggtgagataacagcccaccaaggcgacgatcagtagccgacctgagagggtgaccggccacattgggactgagacacggcccagactcctacgggaggcagcagtggggaatattgcacaatggaggaaactctgatgcagcgacgccgcgtgagtgaagaagtaattcgttatgtaaagctctatcagcagggaagagtgacggtacctgactaagaagctccggctaaatacgtgccagcagccgcggtaatacgtatggagcaagcgtta…
Haemophilus_ducreyi	730	[Haemophilus]_ducreyi_strain_CIP_54.2_16S_ribosomal_RNA,_partial_sequence	gacgggtgagtaatgcttgggaatctggcttatggagggggataactacgggaaactgtagctaataccgcgtaatttcggattaaagggttgccataagatgagcccaagtgggattaggtagttggttaggtaaaggctgaccaagccgacgatctctagctggtctgagaggatgaccagccacactggaactgagacacggtccagactcctacgggaggcagcagtggggaatattgcacaatgggggaaaccctgatgcagccatgccgcgtgaatgaagaaggccttcgggttgtaaagttctttcggtgatgaggaatgacgttagtcacagaagaagcaccggctaactccgtgccagcagccgcggtaatacggggggtgcgagcgtta…

## Sheet: S6 ARG_Taxa_TPM_all TP
Table S6: List of species associated with resistance carrying contigs.
Sample	Time point	Gene	Resistance mechanism	Drug class	Species	Genus	Contig	Start	End	Raw count	TPM
T1006A_1032005_D1_D2	1	AAC(6')-Ie-APH(2'')-Ia	inactivation	Aminoglycoside	Staphylococcus aureus (taxid 1280)	Staphylococcus	k141_9886	401	1840	8	108.409
T1006A_1032005_D1_D2	1	RlmA(II)	target alteration	Macrolide/Lincosamide	Streptococcus mitis B6 (taxid 365659)	Streptococcus	k141_28272	358	1206	2153	49509
T1006A_1032005_D1_D2	1	RlmA(II)	target alteration	Macrolide/Lincosamide	Streptococcus mitis B6 (taxid 365659)	Streptococcus	k141_51862	8	660	483	14445.6
T1006A_1032005_D1_D2	1	RlmA(II)	target alteration	Macrolide/Lincosamide	Streptococcus oralis subsp. tigurinus (taxid 1077464)	Streptococcus	k141_43029	530	1372	84	1945.37
T1006A_1032005_D1_D2	1	RlmA(II)	target alteration	Macrolide/Lincosamide	Streptococcus pneumoniae (taxid 1313)	Streptococcus	k141_5596	8	660	482	14415.7
T1006A_1032005_D1_D2	1	RlmA(II)	target alteration	Macrolide/Lincosamide	Streptococcus pneumoniae AP200 (taxid 574093)	Streptococcus	k141_67558	1012	1860	1361	31296.7
T1006A_1032005_D1_D2	1	RlmA(II)	target alteration	Macrolide/Lincosamide	Streptococcus sp. oral taxon 431 (taxid 712633)	Streptococcus	k141_67785	1326	2174	381	8761.23
T1006A_1032005_D1_D2	1	RlmA(II)	target alteration	Macrolide/Lincosamide	Streptococcus sp. oral taxon 431 (taxid 712633)	Streptococcus	k141_82562	313	922	25	800.495
T1006A_1032005_D1_D2	1	RlmA(II)	target alteration	Macrolide/Lincosamide	Streptococcus sp. oral taxon 431 (taxid 712633)	Streptococcus	k141_82565	1	836	68	1588.03
T1006A_1032005_D1_D2	1	aph(2'')-Ih	inactivation	Aminoglycoside	Staphylococcus aureus (taxid 1280)	Staphylococcus	k141_9886	1031	1827	0	0
T1006A_1032005_D1_D2	1	blaI	inactivation	Beta-Lactam	Staphylococcus hominis subsp. hominis (taxid 145391)	Staphylococcus	k141_49638	10148	10528	215	11032.9
T1006A_1032005_D1_D2	1	blaI	inactivation	Beta-Lactam	Staphylococcus hominis subsp. hominis (taxid 145391)	Staphylococcus	k141_49638	12382	13227	491	11330.8
T1006A_1032005_D1_D2	1	blaR1	inactivation	Beta-Lactam	Staphylococcus hominis subsp. hominis (taxid 145391)	Staphylococcus	k141_49638	10518	12275	1012	11231.7
T1006A_1032005_D1_D2	1	blaTEM-1	inactivation	Beta-Lactam	Haemophilus influenzae (taxid 727)	Haemophilus	k141_60897	389	1105	0	0
T1006A_1032005_D1_D2	1	blaTEM-104	inactivation	Beta-Lactam	Haemophilus influenzae (taxid 727)	Haemophilus	k141_60897	389	1105	0	0
T1006A_1032005_D1_D2	1	catA16	inactivation	Chloramphenicol	Streptococcus salivarius (taxid 1304)	Streptococcus	k141_87055	2214	2873	78	2308.05
T1006A_1032005_D1_D2	1	cfxA3	inactivation	Beta-Lactam	Prevotella melaninogenica (taxid 28132)	Prevotella	k141_30946	4	906	550	11890.3
T1006A_1032005_D1_D2	1	dfrC	target replacement	Trimethoprim	Staphylococcus epidermidis (taxid 1282)	Staphylococcus	k141_26834	783	1268	17	683.507
T1006A_1032005_D1_D2	1	erm(C)	target alteration	MLS	Staphylococcus aureus (taxid 1280)	Staphylococcus	k141_88904	1562	2296	137	3639.66
T1006A_1032005_D1_D2	1	lnu(A)	inactivation	Lincosamide	Staphylococcus aureus (taxid 1280)	Staphylococcus	k141_62449	310	795	15	603.095
T1006A_1032005_D1_D2	1	macB	efflux	Macrolide	Neisseria subflava (taxid 28449)	Neisseria	k141_31193	2253	4190	46	463.089
T1006A_1032005_D1_D2	1	mef(A)	efflux	Macrolide	Streptococcus (taxid 1301)	Streptococcus	k141_79920	1107	2324	4688	75116.1
T1006A_1032005_D1_D2	1	mph(C)	inactivation	MDR	Staphylococcus (taxid 1279)	Staphylococcus	k141_30885	1	672	12	348.734
T1006A_1032005_D1_D2	1	msr(A)	target protection	MLS	Staphylococcus (taxid 1279)	Staphylococcus	k141_30885	771	1967	23	375.001
T1006A_1032005_D1_D2	1	msr(D)	target protection	Macrolide	Streptococcus (taxid 1301)	Streptococcus	k141_79920	2444	3907	5938	79146.5
T1006A_1032005_D1_D2	1	patA	efflux	Fluoroquinolone	Streptococcus mitis B6 (taxid 365659)	Streptococcus	k141_12839	3697	5391	1109	12766
T1006A_1032005_D1_D2	1	patA	efflux	Fluoroquinolone	Streptococcus mitis B6 (taxid 365659)	Streptococcus	k141_29963	1	1554	1221	15331.3
T1006A_1032005_D1_D2	1	patA	efflux	Fluoroquinolone	Streptococcus mitis B6 (taxid 365659)	Streptococcus	k141_5892	2578	4227	278	3287.46
T1006A_1032005_D1_D2	1	patA	efflux	Fluoroquinolone	Streptococcus mitis B6 (taxid 365659)	Streptococcus	k141_68081	109	1803	2666	30689
T1006A_1032005_D1_D2	1	patB	efflux	Fluoroquinolone	Streptococcus mitis B6 (taxid 365659)	Streptococcus	k141_12839	1917	3683	1462	16143.3
T1006A_1032005_D1_D2	1	patB	efflux	Fluoroquinolone	Streptococcus mitis B6 (taxid 365659)	Streptococcus	k141_29963	1568	3334	1675	18495.2
T1006A_1032005_D1_D2	1	patB	efflux	Fluoroquinolone	Streptococcus mitis B6 (taxid 365659)	Streptococcus	k141_5892	798	2564	928	10246.9
T1006A_1032005_D1_D2	1	penA	inactivation	Beta-Lactam	Neisseria subflava (taxid 28449)	Neisseria	k141_54231	130	1878	58	647.027
T1006A_1032005_D1_D2	1	str	target alteration	Aminoglycoside	Staphylococcus aureus (taxid 1280)	Staphylococcus	k141_4098	3870	4718	350	8048.37
T1006A_1032005_D1_D2	1	tet(M)	target protection	Tetracycline	Veillonella dispar (taxid 39778)	Veillonella	k141_13178	5581	7500	0	0
T1006A_1032005_D1_D2	1	tet(O)	target protection	Tetracycline	Veillonella dispar (taxid 39778)	Veillonella	k141_13178	5581	7500	0	0
T1006A_1032005_D1_D2	1	tet(W)	target protection	Tetracycline	Coriobacteriales (taxid 84999)	Coriobacteriales	k141_45630	1	1798	61	661.939
T1006A_1032005_D1_D2	1	tetA(46)	efflux	Tetracycline	Streptococcus australis (taxid 113107)	Streptococcus	k141_32992	12909	14633	1386	15677
T1006A_1032005_D1_D2	1	tetA(60)	efflux	Tetracycline	Streptococcus sp. oral taxon 431 (taxid 712633)	Streptococcus	k141_7502	1595	3334	255	2859.41
T1006A_1032005_D1_D2	1	tetB(46)	efflux	Tetracycline	Streptococcus australis (taxid 113107)	Streptococcus	k141_32992	11178	12907	1346	15180.5
T1006A_1032005_D1_D2	1	tetB(60)	efflux	Tetracycline	Bacillus ciccensis (taxid 1670641)	Bacillus	k141_51345	1133	2872	129	1446.53
T1006A_1032005_D1_D2	1	tetB(60)	efflux	Tetracycline	Streptococcus sp. oral taxon 431 (taxid 712633)	Streptococcus	k141_7502	1	1598	114	1391.99
T1013B_12042005_D1_D2	1	Mef(En2)	efflux	Macrolide	Bacteroides fragilis 638R (taxid 862962)	Bacteroides	k141_69609	8691	9896	119	2375.36
T1013B_12042005_D1_D2	1	RlmA(II)	target alteration	Macrolide/Lincosamide	Streptococcus mitis (taxid 28037)	Streptococcus	k141_52120	363	1211	183	5190.69
T1013B_12042005_D1_D2	1	RlmA(II)	target alteration	Macrolide/Lincosamide	Streptococcus mitis (taxid 28037)	Streptococcus	k141_54902	394	1242	42	1191.31
T1013B_12042005_D1_D2	1	RlmA(II)	target alteration	Macrolide/Lincosamide	Streptococcus mitis (taxid 28037)	Streptococcus	k141_71770	110	958	815	23117
T1013B_12042005_D1_D2	1	RlmA(II)	target alteration	Macrolide/Lincosamide	Streptococcus mitis B6 (taxid 365659)	Streptococcus	k141_2227	131	979	125	3545.55
T1013B_12042005_D1_D2	1	RlmA(II)	target alteration	Macrolide/Lincosamide	Streptococcus mitis B6 (taxid 365659)	Streptococcus	k141_31540	122	970	226	6410.36
T1013B_12042005_D1_D2	1	RlmA(II)	target alteration	Macrolide/Lincosamide	Streptococcus pseudopneumoniae IS7493 (taxid 1054460)	Streptococcus	k141_11971	131	979	57	1616.77
T1013B_12042005_D1_D2	1	bla1	inactivation	Beta-Lactam	Bacillus cereus ATCC 10876 (taxid 526980)	Bacillus	k141_63039	68527	69447	260	6797.6
T1013B_12042005_D1_D2	1	bla2	inactivation	Beta-Lactam	Bacillus cereus ATCC 10876 (taxid 526980)	Bacillus	k141_47727	99159	99932	525	16336.2
T1013B_12042005_D1_D2	1	blaI	inactivation	Beta-Lactam	Staphylococcus aureus (taxid 1280)	Staphylococcus	k141_68861	117	497	10	632.975
T1013B_12042005_D1_D2	1	cfxA3	inactivation	Beta-Lactam	Bacteroides heparinolyticus (taxid 28113)	Bacteroides	k141_13285	94	1059	882	21984.2
T1013B_12042005_D1_D2	1	fosB	inactivation	Fosfomycin	Bacillus cereus ATCC 10876 (taxid 526980)	Bacillus	k141_64592	111363	111779	160	9251.17
T1013B_12042005_D1_D2	1	lnu(A)	inactivation	Lincosamide	Staphylococcus aureus (taxid 1280)	Staphylococcus	k141_40557	108	593	148	7339.9
T1013B_12042005_D1_D2	1	lnu(AN2)	inactivation	Lincosamide	Bacteroides fragilis 638R (taxid 862962)	Bacteroides	k141_69609	9921	10390	60	3077.15
T1013B_12042005_D1_D2	1	macA	efflux	Macrolide	Neisseria cinerea (taxid 483)	Neisseria	k141_40267	4837	6009	150	3078.46
T1013B_12042005_D1_D2	1	macB	efflux	Macrolide	Neisseria cinerea (taxid 483)	Neisseria	k141_40267	6082	8016	300	3731.08
T1013B_12042005_D1_D2	1	macB	efflux	Macrolide	Neisseria subflava (taxid 28449)	Neisseria	k141_2155	8397	10334	267	3315.52
T1013B_12042005_D1_D2	1	mef(A)	efflux	Macrolide	Streptococcus (taxid 1301)	Streptococcus	k141_70860	2326	3543	3274	64708
T1013B_12042005_D1_D2	1	mef(E)	efflux	Macrolide	Streptococcus oralis (taxid 1303)	Streptococcus	k141_37901	780	1974	244	4915.36
T1013B_12042005_D1_D2	1	msr(D)	target protection	Macrolide	Streptococcus (taxid 1301)	Streptococcus	k141_70860	743	2206	3935	64694.9
T1013B_12042005_D1_D2	1	patA	efflux	Fluoroquinolone	Streptococcus mitis B6 (taxid 365659)	Streptococcus	k141_10313	1	1503	203	3250.84
T1013B_12042005_D1_D2	1	patA	efflux	Fluoroquinolone	Streptococcus mitis B6 (taxid 365659)	Streptococcus	k141_12009	335	2029	577	8192.8
T1013B_12042005_D1_D2	1	patA	efflux	Fluoroquinolone	Streptococcus mitis B6 (taxid 365659)	Streptococcus	k141_26287	2799	4493	584	8292.19
T1013B_12042005_D1_D2	1	patA	efflux	Fluoroquinolone	Streptococcus mitis B6 (taxid 365659)	Streptococcus	k141_29948	3	1393	139	2405.3
T1013B_12042005_D1_D2	1	patA	efflux	Fluoroquinolone	Streptococcus mitis B6 (taxid 365659)	Streptococcus	k141_4544	3744	5438	2188	31067.3
T1013B_12042005_D1_D2	1	patA	efflux	Fluoroquinolone	Streptococcus mitis B6 (taxid 365659)	Streptococcus	k141_70831	2821	4515	292	4146.1
T1013B_12042005_D1_D2	1	patA	efflux	Fluoroquinolone	Streptococcus sp. oral taxon 431 (taxid 712633)	Streptococcus	k141_2753	404	1648	41	792.745
T1013B_12042005_D1_D2	1	patB	efflux	Fluoroquinolone	Streptococcus mitis B6 (taxid 365659)	Streptococcus	k141_26287	4507	6273	499	6796.41
T1013B_12042005_D1_D2	1	patB	efflux	Fluoroquinolone	Streptococcus mitis B6 (taxid 365659)	Streptococcus	k141_36861	231	1997	307	4181.36
T1013B_12042005_D1_D2	1	patB	efflux	Fluoroquinolone	Streptococcus mitis B6 (taxid 365659)	Streptococcus	k141_4544	1964	3730	877	11944.8
T1013B_12042005_D1_D2	1	patB	efflux	Fluoroquinolone	Streptococcus mitis B6 (taxid 365659)	Streptococcus	k141_70831	4529	6035	562	8975.97
T1013B_12042005_D1_D2	1	penA	inactivation	Beta-Lactam	Neisseria cinerea (taxid 483)	Neisseria	k141_25260	15132	16880	299	4114.34
T1013B_12042005_D1_D2	1	penA	inactivation	Beta-Lactam	Neisseria subflava (taxid 28449)	Neisseria	k141_52589	79376	81124	283	3894.17
T1013B_12042005_D1_D2	1	tetA(60)	efflux	Tetracycline	Streptococcus gordonii (taxid 1302)	Streptococcus	k141_43923	7169	8908	79	1092.69
T1013B_12042005_D1_D2	1	tetB(60)	efflux	Tetracycline	Streptococcus gordonii (taxid 1302)	Streptococcus	k141_43923	5433	7172	89	1231.01
T1013B_12042005_D1_D2	1	vanZ-F	target alteration	Vancomycin	Bacillus cereus ATCC 10876 (taxid 526980)	Bacillus	k141_8801	76331	76918	307	12579.7
T1016B_28042005_D1_D2	1	AAC(6')-Ie-APH(2'')-Ia	inactivation	Aminoglycoside	Staphylococcus aureus (taxid 1280)	Staphylococcus	k141_7609	1660	3099	10	310.114
T1016B_28042005_D1_D2	1	RlmA(II)	target alteration	Macrolide/Lincosamide	Streptococcus mitis B6 (taxid 365659)	Streptococcus	k141_10643	559	1211	45	3079.98
T1016B_28042005_D1_D2	1	RlmA(II)	target alteration	Macrolide/Lincosamide	Streptococcus pneumoniae (taxid 1313)	Streptococcus	k141_23619	1588	2436	248	13050.8
T1016B_28042005_D1_D2	1	RlmA(II)	target alteration	Macrolide/Lincosamide	Streptococcus pneumoniae (taxid 1313)	Streptococcus	k141_23623	18	866	44	2315.47
T1016B_28042005_D1_D2	1	RlmA(II)	target alteration	Macrolide/Lincosamide	Streptococcus sp. oral taxon 431 (taxid 712633)	Streptococcus	k141_32610	5274	6122	95	4999.32
T1016B_28042005_D1_D2	1	aph(2'')-Ih	inactivation	Aminoglycoside	Staphylococcus aureus (taxid 1280)	Staphylococcus	k141_7609	1673	2469	0	0
T1016B_28042005_D1_D2	1	blaI	inactivation	Beta-Lactam	Staphylococcus aureus subsp. aureus (taxid 46170)	Staphylococcus	k141_24585	3398	3778	641	75276.1
T1016B_28042005_D1_D2	1	blaI	inactivation	Beta-Lactam	Staphylococcus aureus subsp. aureus (taxid 46170)	Staphylococcus	k141_24585	699	1544	1537	81170.8
T1016B_28042005_D1_D2	1	blaI	inactivation	Beta-Lactam	Staphylococcus epidermidis (taxid 1282)	Staphylococcus	k141_26298	62462	62842	104	12213.3
T1016B_28042005_D1_D2	1	blaR1	inactivation	Beta-Lactam	Staphylococcus aureus subsp. aureus (taxid 46170)	Staphylococcus	k141_24585	1651	3408	2380	60448.8
T1016B_28042005_D1_D2	1	cfxA3	inactivation	Beta-Lactam	Prevotella (taxid 838)	Prevotella	k141_20755	15010	15975	41	1896
T1016B_28042005_D1_D2	1	dfrC	target replacement	Trimethoprim	Staphylococcus epidermidis PM221 (taxid 1449752)	Staphylococcus	k141_5312	28104	28589	165	15181.9
T1016B_28042005_D1_D2	1	fusC	target protection	Fusidic Acid	Staphylococcus aureus (taxid 1280)	Staphylococcus	k141_3806	329	780	11	1088.43
T1016B_28042005_D1_D2	1	fusD	target protection	Fusidic Acid	Staphylococcus saprophyticus subsp. saprophyticus (taxid 147452)	Staphylococcus	k141_22776	12761	13402	67	4664.44
T1016B_28042005_D1_D2	1	mecA	inactivation	Beta-Lactam	Staphylococcus aureus (taxid 1280)	Staphylococcus	k141_12308	2423	4429	71	1579.47
T1016B_28042005_D1_D2	1	mecI	inactivation	Beta-Lactam	Staphylococcus aureus (taxid 1280)	Staphylococcus	k141_12308	6286	6657	7	841.99
T1016B_28042005_D1_D2	1	mecR1	inactivation	Beta-Lactam	Staphylococcus aureus (taxid 1280)	Staphylococcus	k141_12308	4529	6286	55	1396.93
T1016B_28042005_D1_D2	1	mef(A)	efflux	Macrolide	Streptococcus pseudopneumoniae IS7493 (taxid 1054460)	Streptococcus	k141_11662	2089	3306	605	22184.4
T1016B_28042005_D1_D2	1	msr(D)	target protection	Macrolide	Streptococcus pseudopneumoniae IS7493 (taxid 1054460)	Streptococcus	k141_11662	506	1969	714	21778.9
T1016B_28042005_D1_D2	1	mupA	target alteration	Mupirocin	Staphylococcus aureus subsp. aureus ST228 (taxid 1074919)	Staphylococcus	k141_3766	7765	10839	940	13646
T1016B_28042005_D1_D2	1	patA	efflux	Fluoroquinolone	Streptococcus mitis B6 (taxid 365659)	Streptococcus	k141_5852	2598	4292	323	8508.87
T1016B_28042005_D1_D2	1	patA	efflux	Fluoroquinolone	Streptococcus mitis B6 (taxid 365659)	Streptococcus	k141_8034	4226	5547	90	3040.34
T1016B_28042005_D1_D2	1	patB	efflux	Fluoroquinolone	Streptococcus mitis B6 (taxid 365659)	Streptococcus	k141_5852	4306	5957	80	2162.35
T1016B_28042005_D1_D2	1	patB	efflux	Fluoroquinolone	Streptococcus mitis B6 (taxid 365659)	Streptococcus	k141_8034	2446	4212	388	9804.46
T1016B_28042005_D1_D2	1	tet(38)	efflux	Tetracycline	Staphylococcus aureus (taxid 1280)	Staphylococcus	k141_3780	1208	2560	37	1221.26
T1016B_28042005_D1_D2	1	tet(M)	target protection	Tetracycline	Streptococcus sanguinis (taxid 1305)	Streptococcus	k141_14408	4417	6336	0	0
T1016B_28042005_D1_D2	1	tet(O)	target protection	Tetracycline	Streptococcus sanguinis (taxid 1305)	Streptococcus	k141_14408	4417	6336	0	0
T1016B_28042005_D1_D2	1	tetA(46)	efflux	Tetracycline	Streptococcus parasanguinis ATCC 15912 (taxid 760570)	Streptococcus	k141_22862	711	2435	98	2536.71
T1016B_28042005_D1_D2	1	tetA(60)	efflux	Tetracycline	Streptococcus merionis (taxid 400065)	Streptococcus	k141_32721	4721	6460	192	4927.02
T1016B_28042005_D1_D2	1	tetB(46)	efflux	Tetracycline	Streptococcus parasanguinis ATCC 15912 (taxid 760570)	Streptococcus	k141_22862	2437	4166	100	2581
T1016B_28042005_D1_D2	1	tetB(60)	efflux	Tetracycline	Streptococcus merionis (taxid 400065)	Streptococcus	k141_32721	2985	4724	166	4259.82
T1018A_1032005_D1_D2	1	RlmA(II)	target alteration	Macrolide/Lincosamide	Streptococcus mitis (taxid 28037)	Streptococcus	k141_107682	353	1201	243	4476.88
T1018A_1032005_D1_D2	1	RlmA(II)	target alteration	Macrolide/Lincosamide	Streptococcus mitis B6 (taxid 365659)	Streptococcus	k141_33213	566	1414	229	4218.95
T1018A_1032005_D1_D2	1	RlmA(II)	target alteration	Macrolide/Lincosamide	Streptococcus mitis B6 (taxid 365659)	Streptococcus	k141_55962	1123	1971	58	1068.56
T1018A_1032005_D1_D2	1	RlmA(II)	target alteration	Macrolide/Lincosamide	Streptococcus mitis B6 (taxid 365659)	Streptococcus	k141_82959	218	1052	1374	25738.6
T1018A_1032005_D1_D2	1	RlmA(II)	target alteration	Macrolide/Lincosamide	Streptococcus sp. oral taxon 431 (taxid 712633)	Streptococcus	k141_5219	1056	1897	290	5387.25
T1018A_1032005_D1_D2	1	RlmA(II)	target alteration	Macrolide/Lincosamide	Streptococcus sp. oral taxon 431 (taxid 712633)	Streptococcus	k141_58735	326	1166	42	781.151
T1018A_1032005_D1_D2	1	RlmA(II)	target alteration	Macrolide/Lincosamide	Streptococcus sp. oral taxon 431 (taxid 712633)	Streptococcus	k141_64852	818	1666	332	6116.56
T1018A_1032005_D1_D2	1	blaI	inactivation	Beta-Lactam	Staphylococcus (taxid 1279)	Staphylococcus	k141_103116	47	699	38	910.544
T1018A_1032005_D1_D2	1	blaI	inactivation	Beta-Lactam	Staphylococcus aureus (taxid 1280)	Staphylococcus	k141_92592	1	590	19	503.968
T1018A_1032005_D1_D2	1	blaI	inactivation	Beta-Lactam	Staphylococcus epidermidis (taxid 1282)	Staphylococcus	k141_6442	1	272	28	1614.19
T1018A_1032005_D1_D2	1	blaR1	inactivation	Beta-Lactam	Staphylococcus aureus subsp. aureus (taxid 46170)	Staphylococcus	k141_102187	1	1747	130	1163.23
T1018A_1032005_D1_D2	1	blaR1	inactivation	Beta-Lactam	Staphylococcus chromogenes (taxid 46126)	Staphylococcus	k141_102192	1	1747	99	885.841
T1018A_1032005_D1_D2	1	cfxA3	inactivation	Beta-Lactam	Prevotella scopos JCM 17725 (taxid 1236518)	Prevotella	k141_102574	2942	3907	182	2946.52
T1018A_1032005_D1_D2	1	dfrC	target replacement	Trimethoprim	Staphylococcus epidermidis PM221 (taxid 1449752)	Staphylococcus	k141_51135	43474	43959	48	1546.2
T1018A_1032005_D1_D2	1	erm(B)	target alteration	MLS	Streptococcus agalactiae (taxid 1311)	Streptococcus	k141_101638	7418	8155	0	0
T1018A_1032005_D1_D2	1	erm(B)	target alteration	MLS	Streptococcus agalactiae (taxid 1311)	Streptococcus	k141_101638	7418	8180	14	287.037
T1018A_1032005_D1_D2	1	macB	efflux	Macrolide	Neisseria subflava (taxid 28449)	Neisseria	k141_96351	8389	10326	1138	9178.62
T1018A_1032005_D1_D2	1	mecA	inactivation	Beta-Lactam	Staphylococcus aureus (taxid 1280)	Staphylococcus	k141_81429	2795	4801	497	3870.71
T1018A_1032005_D1_D2	1	mecI	inactivation	Beta-Lactam	Staphylococcus aureus (taxid 1280)	Staphylococcus	k141_81429	6658	7029	112	4716.38
T1018A_1032005_D1_D2	1	mecR1	inactivation	Beta-Lactam	Staphylococcus aureus (taxid 1280)	Staphylococcus	k141_81429	4901	6658	363	3227.75
T1018A_1032005_D1_D2	1	mef(A)	efflux	Macrolide	Streptococcus sp. 1643 (taxid 2576376)	Streptococcus	k141_33954	25514	26731	8964	115074
T1018A_1032005_D1_D2	1	mef(E)	efflux	Macrolide	Streptococcus pneumoniae (taxid 1313)	Streptococcus	k141_37299	10365	11514	258	3508.04
T1018A_1032005_D1_D2	1	mph(C)	inactivation	MDR	Staphylococcus epidermidis (taxid 1282)	Staphylococcus	k141_109591	660	1559	128	2224.41
T1018A_1032005_D1_D2	1	msr(A)	target protection	MLS	Staphylococcus epidermidis (taxid 1282)	Staphylococcus	k141_109591	1658	3124	194	2067.44
T1018A_1032005_D1_D2	1	msr(D)	target protection	Macrolide	Streptococcus pseudopneumoniae IS7493 (taxid 1054460)	Streptococcus	k141_103289	13	1476	10938	116804
T1018A_1032005_D1_D2	1	patA	efflux	Fluoroquinolone	Streptococcus mitis B6 (taxid 365659)	Streptococcus	k141_102506	2753	4447	5815	53629.2
T1018A_1032005_D1_D2	1	patA	efflux	Fluoroquinolone	Streptococcus mitis B6 (taxid 365659)	Streptococcus	k141_13158	43	1361	228	2702.62
T1018A_1032005_D1_D2	1	patA	efflux	Fluoroquinolone	Streptococcus mitis B6 (taxid 365659)	Streptococcus	k141_56391	12324	13691	1458	16663
T1018A_1032005_D1_D2	1	patA	efflux	Fluoroquinolone	Streptococcus sp. oral taxon 431 (taxid 712633)	Streptococcus	k141_91204	1	1298	184	2216.37
T1018A_1032005_D1_D2	1	patB	efflux	Fluoroquinolone	Streptococcus mitis B6 (taxid 365659)	Streptococcus	k141_102506	4461	6071	5141	49886.9
T1018A_1032005_D1_D2	1	patB	efflux	Fluoroquinolone	Streptococcus mitis B6 (taxid 365659)	Streptococcus	k141_48439	482	2092	1697	16467.2
T1018A_1032005_D1_D2	1	penA	inactivation	Beta-Lactam	Neisseria subflava (taxid 28449)	Neisseria	k141_58362	105217	106965	1303	11645.8
T1018A_1032005_D1_D2	1	tet(B)	efflux	Tetracycline	Klebsiella michiganensis E718 (taxid 1191061)	Klebsiella	k141_67358	1387	2592	27	350.059
T1018A_1032005_D1_D2	1	tet(M)	target protection	Tetracycline	Enterococcus sp. HSIEG1 (taxid 1316414)	Enterococcus	k141_23990	30	1706	0	0
T1018A_1032005_D1_D2	1	tet(M)	target protection	Tetracycline	Escherichia coli (taxid 562)	Escherichia	k141_23991	30	1706	0	0
T1018A_1032005_D1_D2	1	tet(O)	target protection	Tetracycline	Enterococcus sp. HSIEG1 (taxid 1316414)	Enterococcus	k141_23990	30	1706	0	0
T1018A_1032005_D1_D2	1	tet(O)	target protection	Tetracycline	Escherichia coli (taxid 562)	Escherichia	k141_23991	30	1706	0	0
T1018A_1032005_D1_D2	1	tet(O)	target protection	Tetracycline	Streptococcus sp. HSISM1 (taxid 1316408)	Streptococcus	k141_89709	9544	11463	76	618.733
T1018A_1032005_D1_D2	1	tet(Q)	target protection	Tetracycline	Bacteroidales (taxid 171549)	Bacteroidales	k141_23291	1	1744	0	0
T1018A_1032005_D1_D2	1	tet(Q)	target protection	Tetracycline	Bacteroidales (taxid 171549)	Bacteroidales	k141_23291	1	1780	3	26.3457
T1018A_1032005_D1_D2	1	tet(W)	target protection	Tetracycline	Veillonella parvula HSIVP1 (taxid 1316254)	Veillonella	k141_13156	7759	9678	89	724.569
T1018A_1032005_D1_D2	1	tetA(46)	efflux	Tetracycline	Streptococcus australis (taxid 113107)	Streptococcus	k141_44400	1589	3313	103	933.394
T1018A_1032005_D1_D2	1	tetA(60)	efflux	Tetracycline	Firmicutes (taxid 1239)	Firmicutes	k141_78848	2	1399	94	1051.23
T1018A_1032005_D1_D2	1	tetA(60)	efflux	Tetracycline	Terrabacteria group (taxid 1783272)	Terrabacteria	k141_18057	432	2119	321	2972.73
T1018A_1032005_D1_D2	1	tetB(46)	efflux	Tetracycline	Streptococcus australis (taxid 113107)	Streptococcus	k141_44400	1	1587	76	748.644
T1018A_1032005_D1_D2	1	tetB(46)	efflux	Tetracycline	Streptococcus parasanguinis FW213 (taxid 1114965)	Streptococcus	k141_2877	1	1587	225	2216.38
T1018A_1032005_D1_D2	1	tetB(60)	efflux	Tetracycline	Bacillus sp. FJAT-25496 (taxid 1742359)	Bacillus	k141_47442	731	1934	139	1805.15
T1018A_1032005_D1_D2	1	tetB(60)	efflux	Tetracycline	Mycobacteriaceae (taxid 1762)	Mycobacteriaceae	k141_101409	181	1920	121	1087.05
T1018A_1032005_D1_D2	1	tetB(60)	efflux	Tetracycline	Staphylococcus schleiferi (taxid 1295)	Staphylococcus	k141_93790	1	1204	118	1532.43
T1018A_1032005_D1_D2	1	tetB(60)	efflux	Tetracycline	unclassified (taxid 0)	Unclassified	k141_20985	1	1265	77	951.719
T1018B_1032005_D1_D2	1	RlmA(II)	target alteration	Macrolide/Lincosamide	Streptococcus mitis (taxid 28037)	Streptococcus	k141_46793	98	946	302	6272.36
T1018B_1032005_D1_D2	1	RlmA(II)	target alteration	Macrolide/Lincosamide	Streptococcus mitis B6 (taxid 365659)	Streptococcus	k141_20586	1835	2683	285	5919.28
T1018B_1032005_D1_D2	1	RlmA(II)	target alteration	Macrolide/Lincosamide	Streptococcus mitis B6 (taxid 365659)	Streptococcus	k141_33389	578	1417	1356	28465.4
T1018B_1032005_D1_D2	1	RlmA(II)	target alteration	Macrolide/Lincosamide	Streptococcus pseudopneumoniae IS7493 (taxid 1054460)	Streptococcus	k141_56380	1670	2518	3235	67189
T1018B_1032005_D1_D2	1	RlmA(II)	target alteration	Macrolide/Lincosamide	Streptococcus sp. 116-D4 (taxid 2598453)	Streptococcus	k141_39088	827	1675	196	4070.8
T1018B_1032005_D1_D2	1	RlmA(II)	target alteration	Macrolide/Lincosamide	Streptococcus sp. oral taxon 431 (taxid 712633)	Streptococcus	k141_33607	707	1332	15	422.699
T1018B_1032005_D1_D2	1	cfxA3	inactivation	Beta-Lactam	Bacteroidetes (taxid 976)	Bacteroidetes	k141_14085	54	1015	1064	19500.2
T1018B_1032005_D1_D2	1	erm(B)	target alteration	MLS	Streptococcus agalactiae (taxid 1311)	Streptococcus	k141_14937	784	1366	13	393.405
T1018B_1032005_D1_D2	1	macA	efflux	Macrolide	Neisseria cinerea (taxid 483)	Neisseria	k141_10257	125721	126893	154	2314.26
T1018B_1032005_D1_D2	1	macB	efflux	Macrolide	Neisseria cinerea (taxid 483)	Neisseria	k141_10257	123714	125648	227	2067.23
T1018B_1032005_D1_D2	1	mef(A)	efflux	Macrolide	Streptococcus (taxid 1301)	Streptococcus	k141_21869	528	1745	8143	117846
T1018B_1032005_D1_D2	1	mef(E)	efflux	Macrolide	Streptococcus pneumoniae SPNA45 (taxid 869309)	Streptococcus	k141_22692	2495	3671	4663	69835.8
T1018B_1032005_D1_D2	1	mef(E)	efflux	Macrolide	Streptococcus respiraculi (taxid 2021971)	Streptococcus	k141_31979	233	1192	16	293.847
T1018B_1032005_D1_D2	1	msr(D)	target protection	Macrolide	Bacilli (taxid 91061)	Bacilli	k141_10856	506	1647	7780	120092
T1018B_1032005_D1_D2	1	patA	efflux	Fluoroquinolone	Streptococcus mitis B6 (taxid 365659)	Streptococcus	k141_18066	1108	2802	1007	10469.7
T1018B_1032005_D1_D2	1	patA	efflux	Fluoroquinolone	Streptococcus mitis B6 (taxid 365659)	Streptococcus	k141_19884	392	2086	566	5884.68
T1018B_1032005_D1_D2	1	patA	efflux	Fluoroquinolone	Streptococcus mitis B6 (taxid 365659)	Streptococcus	k141_30900	32	1723	590	6145.09
T1018B_1032005_D1_D2	1	patB	efflux	Fluoroquinolone	Streptococcus mitis B6 (taxid 365659)	Streptococcus	k141_12198	1	1621	427	4642.29
T1018B_1032005_D1_D2	1	patB	efflux	Fluoroquinolone	Streptococcus mitis B6 (taxid 365659)	Streptococcus	k141_19371	312	2078	4561	45487.2
T1018B_1032005_D1_D2	1	patB	efflux	Fluoroquinolone	Streptococcus mitis B6 (taxid 365659)	Streptococcus	k141_22879	735	2501	299	2981.95
T1018B_1032005_D1_D2	1	penA	inactivation	Beta-Lactam	Neisseria cinerea (taxid 483)	Neisseria	k141_49715	136466	138214	339	3415.69
T1018B_1032005_D1_D2	1	penA	inactivation	Beta-Lactam	Neisseria subflava (taxid 28449)	Neisseria	k141_1016	1772	3520	32	322.425
T1018B_1032005_D1_D2	1	tet(M)	target protection	Tetracycline	Streptococcus sp. I-G2 (taxid 1156431)	Streptococcus	k141_2460	3172	5091	0	0
T1018B_1032005_D1_D2	1	tet(O)	target protection	Tetracycline	Streptococcus sp. I-G2 (taxid 1156431)	Streptococcus	k141_2460	3172	5091	0	0
T1026A_28042005_D1_D2	1	AAC(6')-Ie-APH(2'')-Ia	inactivation	Aminoglycoside	Staphylococcus aureus (taxid 1280)	Staphylococcus	k141_18598	1972	3411	45	342.482
T1026A_28042005_D1_D2	1	FosD	inactivation	Fosfomycin	Staphylococcus aureus subsp. aureus (taxid 46170)	Staphylococcus	k141_72094	444	863	0	0
T1026A_28042005_D1_D2	1	RlmA(II)	target alteration	Macrolide/Lincosamide	Streptococcus australis (taxid 113107)	Streptococcus	k141_26689	1	615	44	784.821
T1026A_28042005_D1_D2	1	RlmA(II)	target alteration	Macrolide/Lincosamide	Streptococcus mitis (taxid 28037)	Streptococcus	k141_6805	8	660	97	1629.33
T1026A_28042005_D1_D2	1	RlmA(II)	target alteration	Macrolide/Lincosamide	Streptococcus mitis B6 (taxid 365659)	Streptococcus	k141_27895	377	1225	517	6676.99
T1026A_28042005_D1_D2	1	RlmA(II)	target alteration	Macrolide/Lincosamide	Streptococcus mitis B6 (taxid 365659)	Streptococcus	k141_6807	377	1029	92	1545.35
T1026A_28042005_D1_D2	1	RlmA(II)	target alteration	Macrolide/Lincosamide	Streptococcus oralis subsp. tigurinus (taxid 1077464)	Streptococcus	k141_24723	149	991	28	364.193
T1026A_28042005_D1_D2	1	RlmA(II)	target alteration	Macrolide/Lincosamide	Streptococcus sp. 116-D4 (taxid 2598453)	Streptococcus	k141_66722	1113	1961	693	8950.01
T1026A_28042005_D1_D2	1	aph(2'')-Ih	inactivation	Aminoglycoside	Staphylococcus aureus (taxid 1280)	Staphylococcus	k141_18598	2602	3398	0	0
T1026A_28042005_D1_D2	1	blaI	inactivation	Beta-Lactam	Staphylococcus (taxid 1279)	Staphylococcus	k141_35798	60	440	44	1268.11
T1026A_28042005_D1_D2	1	blaI	inactivation	Beta-Lactam	Staphylococcus aureus (taxid 1280)	Staphylococcus	k141_49087	2757	3137	34	979.899
T1026A_28042005_D1_D2	1	blaI	inactivation	Beta-Lactam	Staphylococcus aureus subsp. aureus (taxid 46170)	Staphylococcus	k141_59547	1818	2198	825	23777
T1026A_28042005_D1_D2	1	blaI	inactivation	Beta-Lactam	Staphylococcus hominis (taxid 1290)	Staphylococcus	k141_60546	6352	7197	2762	35797.5
T1026A_28042005_D1_D2	1	blaI	inactivation	Beta-Lactam	Staphylococcus hominis (taxid 1290)	Staphylococcus	k141_60546	9051	9431	999	28791.8
T1026A_28042005_D1_D2	1	blaR1	inactivation	Beta-Lactam	Staphylococcus aureus subsp. aureus (taxid 46170)	Staphylococcus	k141_59547	71	1828	6933	43215.1
T1026A_28042005_D1_D2	1	blaR1	inactivation	Beta-Lactam	Staphylococcus hominis (taxid 1290)	Staphylococcus	k141_60546	7304	9061	4884	30443.2
T1026A_28042005_D1_D2	1	catA16	inactivation	Chloramphenicol	Streptococcus salivarius (taxid 1304)	Streptococcus	k141_69074	2722	3381	78	1296.27
T1026A_28042005_D1_D2	1	cfxA3	inactivation	Beta-Lactam	Prevotella intermedia ATCC 25611 = DSM 20706 (taxid 1122984)	Prevotella	k141_51307	43	1008	91	1032.76
T1026A_28042005_D1_D2	1	dfrC	target replacement	Trimethoprim	Staphylococcus epidermidis (taxid 1282)	Staphylococcus	k141_61243	12723	13208	482	10884.1
T1026A_28042005_D1_D2	1	erm(C)	target alteration	MLS	Staphylococcus aureus (taxid 1280)	Staphylococcus	k141_12272	1657	2391	212	3163.2
T1026A_28042005_D1_D2	1	fosB	inactivation	Fosfomycin	Staphylococcus aureus subsp. aureus (taxid 46170)	Staphylococcus	k141_72094	444	863	0	0
T1026A_28042005_D1_D2	1	fusB	target protection	Fusidic Acid	Staphylococcus pasteuri SP1 (taxid 1276282)	Staphylococcus	k141_30474	356	997	20	341.71
T1026A_28042005_D1_D2	1	fusC	target protection	Fusidic Acid	Staphylococcus aureus subsp. aureus (taxid 46170)	Staphylococcus	k141_12873	14824	15462	2616	44905.9
T1026A_28042005_D1_D2	1	mecA	inactivation	Beta-Lactam	Staphylococcus epidermidis (taxid 1282)	Staphylococcus	k141_57470	1716	3722	7384	40313.2
T1026A_28042005_D1_D2	1	mecI	inactivation	Beta-Lactam	Staphylococcus epidermidis (taxid 1282)	Staphylococcus	k141_57470	5579	5950	961	28368.5
T1026A_28042005_D1_D2	1	mecR1	inactivation	Beta-Lactam	Staphylococcus epidermidis (taxid 1282)	Staphylococcus	k141_57470	3822	5579	5611	34974.8
T1026A_28042005_D1_D2	1	mef(A)	efflux	Macrolide	Streptococcus mitis B6 (taxid 365659)	Streptococcus	k141_66897	1098	2315	1426	12832.6
T1026A_28042005_D1_D2	1	mph(C)	inactivation	MDR	Staphylococcus (taxid 1279)	Staphylococcus	k141_24645	182	1081	21	255.827
T1026A_28042005_D1_D2	1	msr(A)	target protection	MLS	Staphylococcus warneri (taxid 1292)	Staphylococcus	k141_14597	570	2036	4497	33595
T1026A_28042005_D1_D2	1	mupA	target alteration	Mupirocin	Staphylococcus epidermidis (taxid 1282)	Staphylococcus	k141_2995	8694	11768	4592	16360
T1026A_28042005_D1_D2	1	patA	efflux	Fluoroquinolone	Streptococcus mitis B6 (taxid 365659)	Streptococcus	k141_13952	11	1705	979	6329.3
T1026A_28042005_D1_D2	1	patA	efflux	Fluoroquinolone	Streptococcus mitis B6 (taxid 365659)	Streptococcus	k141_22078	11	1702	226	1463.7
T1026A_28042005_D1_D2	1	patA	efflux	Fluoroquinolone	Streptococcus mitis B6 (taxid 365659)	Streptococcus	k141_34090	1	1554	983	6932.15
T1026A_28042005_D1_D2	1	patA	efflux	Fluoroquinolone	Streptococcus mitis B6 (taxid 365659)	Streptococcus	k141_67041	200	1894	382	2469.65
T1026A_28042005_D1_D2	1	patA	efflux	Fluoroquinolone	Streptococcus sp. oral taxon 431 (taxid 712633)	Streptococcus	k141_55635	1511	3205	214	1383.52
T1026A_28042005_D1_D2	1	patB	efflux	Fluoroquinolone	Streptococcus mitis B6 (taxid 365659)	Streptococcus	k141_13952	1719	3178	898	6740.73
T1026A_28042005_D1_D2	1	patB	efflux	Fluoroquinolone	Streptococcus mitis B6 (taxid 365659)	Streptococcus	k141_22078	1719	3485	192	1190.68
T1026A_28042005_D1_D2	1	patB	efflux	Fluoroquinolone	Streptococcus mitis B6 (taxid 365659)	Streptococcus	k141_67041	1908	3674	946	5866.6
T1026A_28042005_D1_D2	1	tet(38)	efflux	Tetracycline	Staphylococcus aureus (taxid 1280)	Staphylococcus	k141_35731	8414	9766	210	1701.1
T1026A_28042005_D1_D2	1	tet(K)	efflux	Tetracycline	Staphylococcus warneri (taxid 1292)	Staphylococcus	k141_52800	1574	2953	109	865.662
T1026A_28042005_D1_D2	1	tet(M)	target protection	Tetracycline	Streptococcus milleri (taxid 33040)	Streptococcus	k141_70129	4536	6455	0	0
T1026A_28042005_D1_D2	1	tet(O)	target protection	Tetracycline	Streptococcus milleri (taxid 33040)	Streptococcus	k141_70129	4536	6455	0	0
T1026A_28042005_D1_D2	1	tet(O)	target protection	Tetracycline	Streptococcus pneumoniae G54 (taxid 512566)	Streptococcus	k141_13558	10030	11949	180	1027.27
T1026A_28042005_D1_D2	1	tetA(46)	efflux	Tetracycline	Streptococcus sp. HSISM1 (taxid 1316408)	Streptococcus	k141_14340	1693	3265	119	829.05
T1026A_28042005_D1_D2	1	tetA(46)	efflux	Tetracycline	Streptococcus sp. LPB0220 (taxid 2610896)	Streptococcus	k141_66301	5718	7442	761	4834.3
T1026A_28042005_D1_D2	1	tetA(60)	efflux	Tetracycline	Tenacibaculum todarodis (taxid 1850252)	Tenacibaculum	k141_4187	1	1387	97	766.469
T1026A_28042005_D1_D2	1	tetB(46)	efflux	Tetracycline	Streptococcus sp. HSISM1 (taxid 1316408)	Streptococcus	k141_14340	135	1691	154	1083.92
T1026A_28042005_D1_D2	1	tetB(46)	efflux	Tetracycline	Streptococcus sp. LPB0220 (taxid 2610896)	Streptococcus	k141_66301	7444	9173	711	4503.61
T1026A_28042005_D1_D2	1	tetB(60)	efflux	Tetracycline	Tenacibaculum todarodis (taxid 1850252)	Tenacibaculum	k141_4187	1384	3123	118	743.137
T1026A_28042005_D1_D2	1	tetB(60)	efflux	Tetracycline	Terrabacteria group (taxid 1783272)	Terrabacteria	k141_53892	1	1697	87	561.797
T1026B_28042005_D1_D2	1	AAC(6')-Ie-APH(2'')-Ia	inactivation	Aminoglycoside	Staphylococcus epidermidis ATCC 12228 (taxid 176280)	Staphylococcus	k141_2505	608	2047	110	955.439
T1026B_28042005_D1_D2	1	FosD	inactivation	Fosfomycin	Staphylococcus aureus subsp. aureus ST228 (taxid 1074919)	Staphylococcus	k141_35739	363	782	0	0
T1026B_28042005_D1_D2	1	RlmA(II)	target alteration	Macrolide/Lincosamide	Streptococcus australis (taxid 113107)	Streptococcus	k141_7781	599	1447	114	1680.27
T1026B_28042005_D1_D2	1	RlmA(II)	target alteration	Macrolide/Lincosamide	Streptococcus mitis B6 (taxid 365659)	Streptococcus	k141_18154	1174	2022	734	10818.6
T1026B_28042005_D1_D2	1	RlmA(II)	target alteration	Macrolide/Lincosamide	Streptococcus sp. LPB0220 (taxid 2610896)	Streptococcus	k141_34846	81470	82318	3541	52191.7
T1026B_28042005_D1_D2	1	aph(2'')-Ih	inactivation	Aminoglycoside	Staphylococcus epidermidis ATCC 12228 (taxid 176280)	Staphylococcus	k141_2505	1238	2034	0	0
T1026B_28042005_D1_D2	1	arnA	efflux	Peptide	Pseudomonas oryzihabitans (taxid 47885)	Pseudomonas	k141_570	195766	197731	194	1233.99
T1026B_28042005_D1_D2	1	blaI	inactivation	Beta-Lactam	Staphylococcus (taxid 1279)	Staphylococcus	k141_18658	207	851	583	11315
T1026B_28042005_D1_D2	1	blaI	inactivation	Beta-Lactam	Staphylococcus aureus (taxid 1280)	Staphylococcus	k141_7477	552	932	1232	40522.7
T1026B_28042005_D1_D2	1	blaI	inactivation	Beta-Lactam	Staphylococcus epidermidis (taxid 1282)	Staphylococcus	k141_2461	1	778	1083	17421.2
T1026B_28042005_D1_D2	1	blaI	inactivation	Beta-Lactam	Staphylococcus epidermidis ATCC 12228 (taxid 176280)	Staphylococcus	k141_38047	285	665	280	9209.7
T1026B_28042005_D1_D2	1	blaR1	inactivation	Beta-Lactam	Staphylococcus aureus subsp. aureus (taxid 46170)	Staphylococcus	k141_31726	1	1395	729	6536.36
T1026B_28042005_D1_D2	1	blaR1	inactivation	Beta-Lactam	Staphylococcus aureus subsp. aureus (taxid 46170)	Staphylococcus	k141_43614	1	1593	1680	13189.8
T1026B_28042005_D1_D2	1	catP	inactivation	Chloramphenicol	Streptococcus (taxid 1301)	Streptococcus	k141_30379	88	808	10	173.595
T1026B_28042005_D1_D2	1	cfxA3	inactivation	Beta-Lactam	Bacteroidales (taxid 171549)	Bacteroidales	k141_35624	43	1008	82	1062.08
T1026B_28042005_D1_D2	1	dfrC	target replacement	Trimethoprim	Staphylococcus epidermidis PM221 (taxid 1449752)	Staphylococcus	k141_678	545	1030	6466	166634
T1026B_28042005_D1_D2	1	erm(C)	target alteration	MLS	Staphylococcus aureus (taxid 1280)	Staphylococcus	k141_13578	1598	2332	20	340.569
T1026B_28042005_D1_D2	1	fosB	inactivation	Fosfomycin	Staphylococcus aureus subsp. aureus ST228 (taxid 1074919)	Staphylococcus	k141_35739	363	782	0	0
T1026B_28042005_D1_D2	1	fusC	target protection	Fusidic Acid	Staphylococcus aureus (taxid 1280)	Staphylococcus	k141_42694	14824	15462	680	13321.7
T1026B_28042005_D1_D2	1	mecA	inactivation	Beta-Lactam	Staphylococcus aureus (taxid 1280)	Staphylococcus	k141_3214	2440	4446	1735	10810.3
T1026B_28042005_D1_D2	1	mecI	inactivation	Beta-Lactam	Staphylococcus aureus (taxid 1280)	Staphylococcus	k141_3214	212	583	264	8894.08
T1026B_28042005_D1_D2	1	mecR1	inactivation	Beta-Lactam	Staphylococcus aureus (taxid 1280)	Staphylococcus	k141_3214	583	2340	1232	8764.15
T1026B_28042005_D1_D2	1	mef(A)	efflux	Macrolide	Streptococcus sp. oral taxon 431 (taxid 712633)	Streptococcus	k141_43803	15072	16289	961	9869.7
T1026B_28042005_D1_D2	1	mph(C)	inactivation	MDR	Staphylococcus epidermidis (taxid 1282)	Staphylococcus	k141_2653	2177	3076	147	2043.75
T1026B_28042005_D1_D2	1	msr(A)	target protection	MLS	Staphylococcus epidermidis (taxid 1282)	Staphylococcus	k141_2653	612	2078	425	3623.48
T1026B_28042005_D1_D2	1	msr(D)	target protection	Macrolide	Streptococcus sp. oral taxon 431 (taxid 712633)	Streptococcus	k141_43803	16409	17872	1111	9491.63
T1026B_28042005_D1_D2	1	mupA	target alteration	Mupirocin	Staphylococcus epidermidis (taxid 1282)	Staphylococcus	k141_43387	11329	14403	247	1004.3
T1026B_28042005_D1_D2	1	patA	efflux	Fluoroquinolone	Streptococcus mitis B6 (taxid 365659)	Streptococcus	k141_21752	1913	3607	4850	35784.9
T1026B_28042005_D1_D2	1	patA	efflux	Fluoroquinolone	Streptococcus mitis B6 (taxid 365659)	Streptococcus	k141_22802	1	1603	241	1880.29
T1026B_28042005_D1_D2	1	patA	efflux	Fluoroquinolone	Streptococcus mitis B6 (taxid 365659)	Streptococcus	k141_42710	1	1600	903	7058.46
T1026B_28042005_D1_D2	1	patB	efflux	Fluoroquinolone	Streptococcus mitis B6 (taxid 365659)	Streptococcus	k141_21752	133	1899	4347	30765.9
T1026B_28042005_D1_D2	1	patB	efflux	Fluoroquinolone	Streptococcus mitis B6 (taxid 365659)	Streptococcus	k141_22280	1	1445	644	5574.29
T1026B_28042005_D1_D2	1	patB	efflux	Fluoroquinolone	Streptococcus mitis B6 (taxid 365659)	Streptococcus	k141_22802	1617	3383	325	2300.19
T1026B_28042005_D1_D2	1	patB	efflux	Fluoroquinolone	Streptococcus mitis B6 (taxid 365659)	Streptococcus	k141_9591	1	1290	71	688.456
T1026B_28042005_D1_D2	1	patB	efflux	Fluoroquinolone	Streptococcus sp. oral taxon 431 (taxid 712633)	Streptococcus	k141_24214	1301	2576	38	372.516
T1026B_28042005_D1_D2	1	tet(K)	efflux	Tetracycline	Staphylococcus epidermidis (taxid 1282)	Staphylococcus	k141_29167	828	2207	518	4695.01
T1026B_28042005_D1_D2	1	tet(M)	target protection	Tetracycline	Streptococcus cristatus AS 1.3089 (taxid 1302863)	Streptococcus	k141_7451	36305	38224	0	0
T1026B_28042005_D1_D2	1	tet(O)	target protection	Tetracycline	Streptococcus cristatus AS 1.3089 (taxid 1302863)	Streptococcus	k141_7451	36305	38224	0	0
T1026B_28042005_D1_D2	1	tetA(46)	efflux	Tetracycline	Streptococcus sp. LPB0220 (taxid 2610896)	Streptococcus	k141_1656	7089	8813	829	6010.19
T1026B_28042005_D1_D2	1	tetA(60)	efflux	Tetracycline	Terrabacteria group (taxid 1783272)	Terrabacteria	k141_3719	1	1472	29	246.409
T1026B_28042005_D1_D2	1	tetB(46)	efflux	Tetracycline	Streptococcus sp. LPB0220 (taxid 2610896)	Streptococcus	k141_1656	8815	10544	779	5631.36
T1049A_4102005_D1_D2	1	FosA2	inactivation	Fosfomycin	Enterobacter kobei (taxid 208224)	Enterobacter	k141_13195	4156	4581	0	0
T1049A_4102005_D1_D2	1	FosA5	inactivation	Fosfomycin	Klebsiella oxytoca (taxid 571)	Klebsiella	k141_16016	158623	159034	0	0
T1049A_4102005_D1_D2	1	aph(3')-Ia	inactivation	Aminoglycoside	Klebsiella michiganensis (taxid 1134687)	Klebsiella	k141_6512	2620	3435	0	0
T1049A_4102005_D1_D2	1	aph(3')-Ia	inactivation	Aminoglycoside	Klebsiella michiganensis (taxid 1134687)	Klebsiella	k141_6512	2622	3435	0	0
T1049A_4102005_D1_D2	1	arnA	efflux	Peptide	Pseudomonas fluorescens R124 (taxid 743713)	Pseudomonas	k141_15140	42715	44669	1654	3689.04
T1049A_4102005_D1_D2	1	bacA	target alteration	Peptide	Enterobacter asburiae L1 (taxid 1421338)	Enterobacter	k141_23143	34118	34935	254	1354.92
T1049A_4102005_D1_D2	1	bacA	target alteration	Peptide	Enterobacter kobei (taxid 208224)	Enterobacter	k141_13383	7	824	28	149.362
T1049A_4102005_D1_D2	1	bacA	target alteration	Peptide	Klebsiella oxytoca (taxid 571)	Klebsiella	k141_23883	47518	48339	4696	24928
T1049A_4102005_D1_D2	1	blaACT-28	inactivation	Beta-Lactam	Enterobacter kobei (taxid 208224)	Enterobacter	k141_8020	1046	2188	0	0
T1049A_4102005_D1_D2	1	blaACT-28	inactivation	Beta-Lactam	Enterobacter kobei (taxid 208224)	Enterobacter	k141_8020	1046	2191	0	0
T1049A_4102005_D1_D2	1	blaACT-4	inactivation	Beta-Lactam	Enterobacter asburiae (taxid 61645)	Enterobacter	k141_20926	4365	5507	377	1438.73
T1049A_4102005_D1_D2	1	blaOXY-6-1	inactivation	Beta-Lactam	Klebsiella oxytoca (taxid 571)	Klebsiella	k141_723	46070	46944	4937	24618.1
T1049A_4102005_D1_D2	1	blaSHV-107	inactivation	Beta-lactam	Klebsiella pneumoniae (taxid 573)	Klebsiella	k141_15603	126	986	18	91.2172
T1049A_4102005_D1_D2	1	blaTEM-1	inactivation	Beta-Lactam	Neisseria mucosa (taxid 488)	Neisseria	k141_25144	564	1424	273	1383.46
T1049A_4102005_D1_D2	1	fosA	inactivation	Fosfomycin	Enterobacter kobei (taxid 208224)	Enterobacter	k141_13195	4156	4581	0	0
T1049A_4102005_D1_D2	1	fosA	inactivation	Fosfomycin	Klebsiella oxytoca (taxid 571)	Klebsiella	k141_16016	158618	159034	1	10.4763
T1049A_4102005_D1_D2	1	mcr-9.1	inactivation	Peptide	Enterobacteriaceae (taxid 543)	Enterobacteriaceae	k141_4397	4959	6578	410	1103.67
T1049A_4102005_D1_D2	1	mef(A)	efflux	Macrolide	Streptococcus parasanguinis FW213 (taxid 1114965)	Streptococcus	k141_16901	1	866	20	100.767
T1049A_4102005_D1_D2	1	oqxA10	efflux	Phenicol/Quinolone	Enterobacter kobei (taxid 208224)	Enterobacter	k141_4401	452	1263	12	64.4857
T1049A_4102005_D1_D2	1	oqxA10	efflux	Phenicol/Quinolone	Klebsiella oxytoca (taxid 571)	Klebsiella	k141_19621	45181	46153	2944	13200
T1049A_4102005_D1_D2	1	oqxB	efflux	Phenicol/Quinolone	Klebsiella oxytoca (taxid 571)	Klebsiella	k141_19621	42005	45157	0	0
T1049A_4102005_D1_D2	1	oqxB	efflux	Phenicol/Quinolone	Pantoea vagans C9-1 (taxid 712898)	Pantoea	k141_19315	282378	285500	0	0
T1049A_4102005_D1_D2	1	oqxB20	efflux	Phenicol/Quinolone	Klebsiella oxytoca (taxid 571)	Klebsiella	k141_19621	42005	45157	0	0
T1049A_4102005_D1_D2	1	oqxB27	efflux	Phenicol/Quinolone	Pantoea vagans C9-1 (taxid 712898)	Pantoea	k141_19315	282378	285500	0	0
T1049B_4102005_D1_D2	1	FosA2	inactivation	Fosfomycin	Klebsiella oxytoca (taxid 571)	Klebsiella	k141_3008	150435	150860	0	0
T1049B_4102005_D1_D2	1	FosA5	inactivation	Fosfomycin	Klebsiella oxytoca (taxid 571)	Klebsiella	k141_6027	122189	122600	0	0
T1049B_4102005_D1_D2	1	bacA	target alteration	Peptide	Enterobacter asburiae L1 (taxid 1421338)	Enterobacter	k141_13394	89246	90063	220	1294.48
T1049B_4102005_D1_D2	1	bacA	target alteration	Peptide	Klebsiella oxytoca (taxid 571)	Klebsiella	k141_654	24141	24962	4385	25675.6
T1049B_4102005_D1_D2	1	blaACT-13	inactivation	Beta-Lactam	Enterobacter asburiae L1 (taxid 1421338)	Enterobacter	k141_5150	56880	58024	3	12.6064
T1049B_4102005_D1_D2	1	blaACT-13	inactivation	Beta-Lactam	Enterobacter asburiae L1 (taxid 1421338)	Enterobacter	k141_5150	56882	58027	0	0
T1049B_4102005_D1_D2	1	blaBPU-1	inactivation	Beta-Lactam	Bacillus altitudinis (taxid 293387)	Bacillus	k141_12098	16635	17423	77	469.742
T1049B_4102005_D1_D2	1	blaOXY-6-1	inactivation	Beta-Lactam	Klebsiella pneumoniae (taxid 573)	Klebsiella	k141_9890	46070	46944	5001	27506.8
T1049B_4102005_D1_D2	1	blaTEM-1	inactivation	Beta-Lactam	Neisseria mucosa (taxid 488)	Neisseria	k141_17662	4213	5073	75	419.235
T1049B_4102005_D1_D2	1	dfrE	target replacement	Trimethoprim	Enterococcus faecalis (taxid 1351)	Enterococcus	k141_16727	1	350	3	41.3228
T1049B_4102005_D1_D2	1	fosA	inactivation	Fosfomycin	Klebsiella oxytoca (taxid 571)	Klebsiella	k141_3008	150435	150860	0	0
T1049B_4102005_D1_D2	1	fosA	inactivation	Fosfomycin	Klebsiella oxytoca (taxid 571)	Klebsiella	k141_6027	122184	122600	4	46.2233
T1049B_4102005_D1_D2	1	mcr-9.1	inactivation	Peptide	Enterobacteriaceae (taxid 543)	Enterobacteriaceae	k141_4101	4958	6577	506	1502.44
T1049B_4102005_D1_D2	1	mef(A)	efflux	Macrolide	Streptococcus sp. NPS 308 (taxid 1902136)	Streptococcus	k141_629	7869	9086	55	217.253
T1049B_4102005_D1_D2	1	msr(D)	target protection	Macrolide	Streptococcus sp. NPS 308 (taxid 1902136)	Streptococcus	k141_629	6286	7749	77	253.012
T1049B_4102005_D1_D2	1	oqxA10	efflux	Phenicol/Quinolone	Enterobacter asburiae L1 (taxid 1421338)	Enterobacter	k141_15558	235975	237150	221	904.167
T1049B_4102005_D1_D2	1	oqxA10	efflux	Phenicol/Quinolone	Klebsiella oxytoca (taxid 571)	Klebsiella	k141_11645	47736	48911	4468	18279.7
T1049B_4102005_D1_D2	1	oqxB	efflux	Phenicol/Quinolone	Enterobacter asburiae L1 (taxid 1421338)	Enterobacter	k141_15558	237174	240298	0	0
T1049B_4102005_D1_D2	1	oqxB	efflux	Phenicol/Quinolone	Klebsiella oxytoca (taxid 571)	Klebsiella	k141_11645	44560	47712	0	0
T1049B_4102005_D1_D2	1	oqxB	efflux	Phenicol/Quinolone	Pantoea vagans C9-1 (taxid 712898)	Pantoea	k141_15859	101900	105022	0	0
T1049B_4102005_D1_D2	1	oqxB	efflux	Phenicol/Quinolone	Pantoea vagans C9-1 (taxid 712898)	Pantoea	k141_5741	46767	49885	0	0
T1049B_4102005_D1_D2	1	oqxB20	efflux	Phenicol/Quinolone	Klebsiella oxytoca (taxid 571)	Klebsiella	k141_11645	44560	47712	0	0
T1049B_4102005_D1_D2	1	oqxB27	efflux	Phenicol/Quinolone	Pantoea vagans C9-1 (taxid 712898)	Pantoea	k141_15859	101900	105022	0	0
T1049B_4102005_D1_D2	1	oqxB9	efflux	Phenicol/Quinolone	Enterobacter asburiae L1 (taxid 1421338)	Enterobacter	k141_15558	237174	240298	0	0
T1049B_4102005_D1_D2	1	oqxB9	efflux	Phenicol/Quinolone	Pantoea vagans C9-1 (taxid 712898)	Pantoea	k141_5741	46767	49885	0	0
T1049B_4102005_D1_D2	1	tetA(46)	efflux	Tetracycline	Streptococcus sp. HSISM1 (taxid 1316408)	Streptococcus	k141_13293	957	2681	70	195.189
T1049B_4102005_D1_D2	1	tetB(60)	efflux	Tetracycline	Bacillus sp. FJAT-25496 (taxid 1742359)	Bacillus	k141_3892	397	2136	24	66.3447
T1060A_1072005_D1_D2	1	RlmA(II)	target alteration	Macrolide/Lincosamide	Streptococcus mitis (taxid 28037)	Streptococcus	k141_16449	79	927	81	2780.73
T1060A_1072005_D1_D2	1	RlmA(II)	target alteration	Macrolide/Lincosamide	Streptococcus mitis B6 (taxid 365659)	Streptococcus	k141_13309	22860	23708	3147	108036
T1060A_1072005_D1_D2	1	RlmA(II)	target alteration	Macrolide/Lincosamide	Streptococcus mitis B6 (taxid 365659)	Streptococcus	k141_13764	824	1672	334	11466.2
T1060A_1072005_D1_D2	1	RlmA(II)	target alteration	Macrolide/Lincosamide	Streptococcus pneumoniae (taxid 1313)	Streptococcus	k141_16451	438	1286	201	6900.32
T1060A_1072005_D1_D2	1	RlmA(II)	target alteration	Macrolide/Lincosamide	Streptococcus pneumoniae (taxid 1313)	Streptococcus	k141_1850	695	1543	74	2540.42
T1060A_1072005_D1_D2	1	blaI	inactivation	Beta-Lactam	Staphylococcus aureus subsp. aureus (taxid 46170)	Staphylococcus	k141_13690	1649	2494	374	12885
T1060A_1072005_D1_D2	1	blaI	inactivation	Beta-Lactam	Staphylococcus aureus subsp. aureus (taxid 46170)	Staphylococcus	k141_13690	20079	20459	148	11338.3
T1060A_1072005_D1_D2	1	blaR1	inactivation	Beta-Lactam	Staphylococcus aureus subsp. aureus (taxid 46170)	Staphylococcus	k141_13690	1	1542	496	9370.19
T1060A_1072005_D1_D2	1	blaR1	inactivation	Beta-Lactam	Staphylococcus aureus subsp. aureus (taxid 46170)	Staphylococcus	k141_6025	99	1497	79	1645.09
T1060A_1072005_D1_D2	1	mef(A)	efflux	Macrolide	Streptococcus mitis B6 (taxid 365659)	Streptococcus	k141_1960	2326	3543	3917	93698.4
T1060A_1072005_D1_D2	1	msr(D)	target protection	Macrolide	Streptococcus mitis B6 (taxid 365659)	Streptococcus	k141_1960	743	2206	4700	93523.9
T1060A_1072005_D1_D2	1	patA	efflux	Fluoroquinolone	Streptococcus mitis B6 (taxid 365659)	Streptococcus	k141_13309	2546	4240	3726	64032.2
T1060A_1072005_D1_D2	1	patA	efflux	Fluoroquinolone	Streptococcus mitis B6 (taxid 365659)	Streptococcus	k141_19674	2280	3974	108	1856.01
T1060A_1072005_D1_D2	1	patA	efflux	Fluoroquinolone	Streptococcus mitis B6 (taxid 365659)	Streptococcus	k141_3572	1065	2669	264	4791.47
T1060A_1072005_D1_D2	1	patA	efflux	Fluoroquinolone	Streptococcus mitis B6 (taxid 365659)	Streptococcus	k141_3591	550	2244	421	7234.99
T1060A_1072005_D1_D2	1	patB	efflux	Fluoroquinolone	Streptococcus mitis B6 (taxid 365659)	Streptococcus	k141_13309	766	2532	2626	43288.6
T1060A_1072005_D1_D2	1	patB	efflux	Fluoroquinolone	Streptococcus mitis B6 (taxid 365659)	Streptococcus	k141_16219	194	1960	426	7022.44
T1060A_1072005_D1_D2	1	patB	efflux	Fluoroquinolone	Streptococcus mitis B6 (taxid 365659)	Streptococcus	k141_7850	245	1551	135	3009.26
T1060A_1072005_D1_D2	1	tet(38)	efflux	Tetracycline	Staphylococcus aureus subsp. aureus JKD6159 (taxid 869816)	Staphylococcus	k141_20149	346517	347869	270	5813.75
T1060A_1072005_D1_D2	1	tet(M)	target protection	Tetracycline	Streptococcus sp. CNU 77-61 (taxid 2684658)	Streptococcus	k141_10167	1407	3326	0	0
T1060A_1072005_D1_D2	1	tet(O)	target protection	Tetracycline	Streptococcus sp. CNU 77-61 (taxid 2684658)	Streptococcus	k141_10167	1407	3326	0	0
T1060A_1072005_D1_D2	1	tet(O)	target protection	Tetracycline	Streptococcus sp. HSISM1 (taxid 1316408)	Streptococcus	k141_16756	11147	13066	2423	36757.6
T1060A_1072005_D1_D2	1	tetA(46)	efflux	Tetracycline	Streptococcus sp. HSISM1 (taxid 1316408)	Streptococcus	k141_20162	56204	57928	1835	30986.2
T1060A_1072005_D1_D2	1	tetB(46)	efflux	Tetracycline	Streptococcus sp. HSISM1 (taxid 1316408)	Streptococcus	k141_20162	54473	56202	1862	31351.2
T1060B_1072005_D1_D2	1	FosA5	inactivation	Fosfomycin	Klebsiella variicola At-22 (taxid 640131)	Klebsiella	k141_2306	28678	29097	0	0
T1060B_1072005_D1_D2	1	RlmA(II)	target alteration	Macrolide/Lincosamide	Streptococcus pneumoniae (taxid 1313)	Streptococcus	k141_5362	351	1199	51	595.307
T1060B_1072005_D1_D2	1	RlmA(II)	target alteration	Macrolide/Lincosamide	Streptococcus pneumoniae (taxid 1313)	Streptococcus	k141_5368	493	1341	214	2497.95
T1060B_1072005_D1_D2	1	ant(3'')-IIa	inactivation	Aminoglycoside	Acinetobacter chinensis (taxid 2004650)	Acinetobacter	k141_14665	4152	4940	487	6117.43
T1060B_1072005_D1_D2	1	bacA	target alteration	Peptide	Klebsiella variicola At-22 (taxid 640131)	Klebsiella	k141_7724	74571	75392	3168	38195.2
T1060B_1072005_D1_D2	1	blaLEN-10	inactivation	Beta-lactam	Klebsiella variicola At-22 (taxid 640131)	Klebsiella	k141_7057	92765	93625	2825	32515.2
T1060B_1072005_D1_D2	1	blaOXA-283	inactivation	Beta-Lactam	Acinetobacter lwoffii WJ10621 (taxid 1046625)	Acinetobacter	k141_4331	3720	4543	0	0
T1060B_1072005_D1_D2	1	blaOXA-496	inactivation	Beta-lactam	Acinetobacter lwoffii WJ10621 (taxid 1046625)	Acinetobacter	k141_4331	3720	4559	0	0
T1060B_1072005_D1_D2	1	blaOXA-648	inactivation	Beta-Lactam	Acinetobacter lwoffii WJ10621 (taxid 1046625)	Acinetobacter	k141_4331	3720	4558	0	0
T1060B_1072005_D1_D2	1	fosA	inactivation	Fosfomycin	Klebsiella variicola At-22 (taxid 640131)	Klebsiella	k141_2306	28678	29097	0	0
T1060B_1072005_D1_D2	1	mef(A)	efflux	Macrolide	Streptococcus sp. HSISM1 (taxid 1316408)	Streptococcus	k141_3433	15714	16931	485	3944.73
T1060B_1072005_D1_D2	1	msr(D)	target protection	Macrolide	Streptococcus sp. HSISM1 (taxid 1316408)	Streptococcus	k141_3433	17051	18514	621	4201.59
T1060B_1072005_D1_D2	1	oqxA10	efflux	Phenicol/Quinolone	Klebsiella variicola At-22 (taxid 640131)	Klebsiella	k141_10658	85811	86986	0	0
T1060B_1072005_D1_D2	1	oqxA6	efflux	Phenicol/Quinolone	Klebsiella variicola At-22 (taxid 640131)	Klebsiella	k141_10658	85811	86986	0	0
T1060B_1072005_D1_D2	1	oqxB	efflux	Phenicol/Quinolone	Klebsiella variicola At-22 (taxid 640131)	Klebsiella	k141_10658	82635	85787	0	0
T1060B_1072005_D1_D2	1	oqxB16	efflux	Phenicol/Quinolone	Klebsiella variicola At-22 (taxid 640131)	Klebsiella	k141_10658	82635	85787	0	0
T1060B_1072005_D1_D2	1	patA	efflux	Fluoroquinolone	Streptococcus mitis B6 (taxid 365659)	Streptococcus	k141_11659	6364	8058	368	2150.31
T1060B_1072005_D1_D2	1	patB	efflux	Fluoroquinolone	Streptococcus mitis B6 (taxid 365659)	Streptococcus	k141_11659	4584	6350	297	1664.69
T1060B_1072005_D1_D2	1	tet(O)	target protection	Tetracycline	Streptococcus sp. HSISM1 (taxid 1316408)	Streptococcus	k141_11666	11147	13066	613	3161.93
T1060B_1072005_D1_D2	1	tetA(46)	efflux	Tetracycline	Streptococcus sp. HSISM1 (taxid 1316408)	Streptococcus	k141_11145	73418	75142	465	2669.82
T1060B_1072005_D1_D2	1	tetB(46)	efflux	Tetracycline	Streptococcus sp. HSISM1 (taxid 1316408)	Streptococcus	k141_11145	75144	76873	521	2982.7
T1062A_26092005_D1_D2	1	aadA1	inactivation	Aminoglycoside	Escherichia coli (taxid 562)	Escherichia	k141_19207	17462	18253	0	0
T1062A_26092005_D1_D2	1	ampC	inactivation	Beta-Lactam	Escherichia coli CFT073 (taxid 199310)	Escherichia	k141_20848	32837	33970	0	0
T1062A_26092005_D1_D2	1	ampH	inactivation	Beta-Lactam	Escherichia coli APEC O1 (taxid 405955)	Escherichia	k141_21001	321608	322765	73	547.32
T1062A_26092005_D1_D2	1	ant(3'')-IIa	inactivation	Aminoglycoside	Escherichia coli (taxid 562)	Escherichia	k141_19207	17286	18253	12	107.648
T1062A_26092005_D1_D2	1	aph(3')-IIc	inactivation	Aminoglycoside	Stenotrophomonas maltophilia JV3 (taxid 868597)	Stenotrophomonas	k141_1124	34006	34813	1	10.7493
T1062A_26092005_D1_D2	1	aph(3')-IIc	inactivation	Aminoglycoside	Stenotrophomonas maltophilia JV3 (taxid 868597)	Stenotrophomonas	k141_1124	34008	34813	0	0
T1062A_26092005_D1_D2	1	aph(3')-IIc	inactivation	Aminoglycoside	Stenotrophomonas maltophilia R551-3 (taxid 391008)	Stenotrophomonas	k141_16584	11379	12173	21	229.43
T1062A_26092005_D1_D2	1	aph(3')-IIc	inactivation	Aminoglycoside	Stenotrophomonas maltophilia R551-3 (taxid 391008)	Stenotrophomonas	k141_16584	11401	12173	0	0
T1062A_26092005_D1_D2	1	arnA	efflux	Peptide	Pseudomonas sp. FDAARGOS_380 (taxid 2018067)	Pseudomonas	k141_18671	10360	12323	4100	18118.2
T1062A_26092005_D1_D2	1	bacA	target alteration	Peptide	Escherichia coli O127:H6 (taxid 168807)	Escherichia	k141_11996	63826	64645	63	667.281
T1062A_26092005_D1_D2	1	blaEC-5	inactivation	Beta-Lactam	Escherichia coli CFT073 (taxid 199310)	Escherichia	k141_20848	32837	33970	0	0
T1062A_26092005_D1_D2	1	blaL1	inactivation	Beta-Lactam	Stenotrophomonas maltophilia JV3 (taxid 868597)	Stenotrophomonas	k141_17353	194281	195140	36	363.548
T1062A_26092005_D1_D2	1	blaL1	inactivation	Beta-Lactam	Stenotrophomonas maltophilia JV3 (taxid 868597)	Stenotrophomonas	k141_17353	194320	195140	0	0
T1062A_26092005_D1_D2	1	blaL1	inactivation	Beta-Lactam	Stenotrophomonas maltophilia JV3 (taxid 868597)	Stenotrophomonas	k141_17353	194325	195140	0	0
T1062A_26092005_D1_D2	1	blaL2	inactivation	Beta-Lactam	Stenotrophomonas maltophilia R551-3 (taxid 391008)	Stenotrophomonas	k141_22822	22415	23329	714	6776.48
T1062A_26092005_D1_D2	1	blaTEM-1	inactivation	Beta-Lactam	Escherichia coli (taxid 562)	Escherichia	k141_19207	29006	29866	108	1089.38
T1062A_26092005_D1_D2	1	eptA	efflux	Peptide	Escherichia coli (taxid 562)	Escherichia	k141_9092	7190	8833	132	696.929
T1062A_26092005_D1_D2	1	kdpE	efflux	Aminoglycoside	Escherichia coli ED1a (taxid 585397)	Escherichia	k141_18057	31367	32039	41	529.257
T1062A_26092005_D1_D2	1	mef(A)	efflux	Macrolide	Streptococcus salivarius JIM8777 (taxid 347253)	Streptococcus	k141_414	130233	131450	258	1839
T1062A_26092005_D1_D2	1	msr(D)	target protection	Macrolide	Streptococcus salivarius JIM8777 (taxid 347253)	Streptococcus	k141_414	131570	133033	347	2057.49
T1062A_26092005_D1_D2	1	sul1	target replacement	Sulfonamide	Escherichia coli (taxid 562)	Escherichia	k141_19207	18731	19597	3	30.0508
T1062A_26092005_D1_D2	1	sul1	target replacement	Sulfonamide	Escherichia coli (taxid 562)	Escherichia	k141_19207	18758	19597	0	0
T1062A_26092005_D1_D2	1	tet(42)	efflux	Tetracycline	Microbacterium foliorum (taxid 104336)	Microbacterium	k141_20701	3015	4207	130	946.061
T1062A_26092005_D1_D2	1	tet(42)	efflux	Tetracycline	Microbacterium sp. Y-01 (taxid 2048898)	Microbacterium	k141_6055	1672	2858	566	4139.84
T1062A_26092005_D1_D2	1	tetA(46)	efflux	Tetracycline	Streptococcus australis (taxid 113107)	Streptococcus	k141_9545	1	1516	19	108.791
T1062A_26092005_D1_D2	1	ugd	efflux	Peptide	Escherichia coli APEC IMT5155 (taxid 1329907)	Escherichia	k141_7009	4334	5500	78	580.294
T1062A_26092005_D1_D2	1	vanR-O	target alteration	Vancomycin	Microbacterium foliorum (taxid 104336)	Microbacterium	k141_11495	55079	55729	84	1121.03
T1062A_26092005_D1_D2	1	vanR-O	target alteration	Vancomycin	Microbacterium foliorum (taxid 104336)	Microbacterium	k141_3666	96723	97376	378	5021.47
T1062B_26092005_D1_D2	1	arnA	efflux	Peptide	Pseudomonas sp. FDAARGOS_380 (taxid 2018067)	Pseudomonas	k141_3365	23434	25397	3245	19261.9
T1062B_26092005_D1_D2	1	bla-C	inactivation	Beta-Lactam	Serratia liquefaciens ATCC 27592 (taxid 1346614)	Serratia	k141_4475	203981	205117	0	0
T1062B_26092005_D1_D2	1	blaSPR-1	inactivation	Beta-Lactam	Serratia liquefaciens ATCC 27592 (taxid 1346614)	Serratia	k141_4079	59364	60254	2199	28789.9
T1062B_26092005_D1_D2	1	oqxB	efflux	Phenicol/Quinolone	Serratia liquefaciens ATCC 27592 (taxid 1346614)	Serratia	k141_4482	202224	205327	0	0
T1062B_26092005_D1_D2	1	oqxB9	efflux	Phenicol/Quinolone	Serratia liquefaciens ATCC 27592 (taxid 1346614)	Serratia	k141_4482	202224	205327	0	0
T1062B_26092005_D1_D2	1	tet(42)	efflux	Tetracycline	Microbacterium sp. 1S1 (taxid 2606451)	Microbacterium	k141_4331	3127	4313	408	4008.49
T1062B_26092005_D1_D2	1	vanR-O	target alteration	Vancomycin	Microbacterium foliorum (taxid 104336)	Microbacterium	k141_203	11206	11859	258	4603.75
T1074A_31072005_D1_D2	1	AAC(6')-Ie-APH(2'')-Ia	inactivation	Aminoglycoside	Streptococcus mitis B6 (taxid 365659)	Streptococcus	k141_11491	5920	7359	99	2186.71
T1074A_31072005_D1_D2	1	RlmA(II)	target alteration	Macrolide/Lincosamide	Streptococcus mitis B6 (taxid 365659)	Streptococcus	k141_11207	464	1180	389	17268.5
T1074A_31072005_D1_D2	1	RlmA(II)	target alteration	Macrolide/Lincosamide	Streptococcus mitis B6 (taxid 365659)	Streptococcus	k141_2708	1152	2000	249	9332.99
T1074A_31072005_D1_D2	1	RlmA(II)	target alteration	Macrolide/Lincosamide	Streptococcus mitis B6 (taxid 365659)	Streptococcus	k141_2924	1325	2173	186	6971.63
T1074A_31072005_D1_D2	1	RlmA(II)	target alteration	Macrolide/Lincosamide	Streptococcus mitis B6 (taxid 365659)	Streptococcus	k141_3100	463	1311	263	9857.74
T1074A_31072005_D1_D2	1	RlmA(II)	target alteration	Macrolide/Lincosamide	Streptococcus mitis B6 (taxid 365659)	Streptococcus	k141_5519	2	718	100	4439.2
T1074A_31072005_D1_D2	1	RlmA(II)	target alteration	Macrolide/Lincosamide	Streptococcus mitis B6 (taxid 365659)	Streptococcus	k141_5521	1235	2083	486	18216.2
T1074A_31072005_D1_D2	1	aph(2'')-Ih	inactivation	Aminoglycoside	Streptococcus mitis B6 (taxid 365659)	Streptococcus	k141_11491	6550	7346	0	0
T1074A_31072005_D1_D2	1	blaCIA-4	inactivation	Beta-Lactam	Chryseobacterium indologenes (taxid 253)	Chryseobacterium	k141_12177	682153	683031	4812	174200
T1074A_31072005_D1_D2	1	blaTEM-1	inactivation	Beta-Lactam	Proteobacteria (taxid 1224)	Proteobacteria	k141_10476	1	684	0	0
T1074A_31072005_D1_D2	1	blaTEM-104	inactivation	Beta-Lactam	Proteobacteria (taxid 1224)	Proteobacteria	k141_10476	1	684	0	0
T1074A_31072005_D1_D2	1	catP	inactivation	Chloramphenicol	Streptococcus mitis B6 (taxid 365659)	Streptococcus	k141_2865	2546	3266	126	5562.31
T1074A_31072005_D1_D2	1	erm(B)	target alteration	MLS	Streptococcus mitis B6 (taxid 365659)	Streptococcus	k141_1083	363	1094	0	0
T1074A_31072005_D1_D2	1	erm(B)	target alteration	MLS	Streptococcus mitis B6 (taxid 365659)	Streptococcus	k141_1083	371	1126	11	463.088
T1074A_31072005_D1_D2	1	mef(A)	efflux	Macrolide	Streptococcus mitis (taxid 28037)	Streptococcus	k141_9218	1496	2713	952	24863.6
T1074A_31072005_D1_D2	1	msr(D)	target protection	Macrolide	Streptococcus mitis (taxid 28037)	Streptococcus	k141_9218	2833	4296	1214	26375
T1074A_31072005_D1_D2	1	patB	efflux	Fluoroquinolone	Streptococcus mitis B6 (taxid 365659)	Streptococcus	k141_7720	412	2178	221	3977.58
T1074A_31072005_D1_D2	1	tet(M)	target protection	Tetracycline	Streptococcus mitis B6 (taxid 365659)	Streptococcus	k141_11701	9835	11754	0	0
T1074A_31072005_D1_D2	1	tet(O)	target protection	Tetracycline	Streptococcus mitis B6 (taxid 365659)	Streptococcus	k141_11701	9835	11754	0	0
T1074B_31072005_D1_D2	1	AAC(6')-Ie-APH(2'')-Ia	inactivation	Aminoglycoside	Streptococcus mitis B6 (taxid 365659)	Streptococcus	k141_2943	1051	2490	22	184.492
T1074B_31072005_D1_D2	1	APH(6)-Id	inactivation	Aminoglycoside	Acinetobacter nosocomialis (taxid 106654)	Acinetobacter	k141_4819	1282	2118	292	4214.95
T1074B_31072005_D1_D2	1	RlmA(II)	target alteration	Macrolide/Lincosamide	Streptococcus mitis (taxid 28037)	Streptococcus	k141_12721	317	985	800	14452
T1074B_31072005_D1_D2	1	RlmA(II)	target alteration	Macrolide/Lincosamide	Streptococcus mitis B6 (taxid 365659)	Streptococcus	k141_18319	463	1311	512	7286.01
T1074B_31072005_D1_D2	1	RlmA(II)	target alteration	Macrolide/Lincosamide	Streptococcus mitis B6 (taxid 365659)	Streptococcus	k141_20534	2	774	5532	86473.1
T1074B_31072005_D1_D2	1	RlmA(II)	target alteration	Macrolide/Lincosamide	Streptococcus mitis B6 (taxid 365659)	Streptococcus	k141_21378	464	1312	506	7200.63
T1074B_31072005_D1_D2	1	RlmA(II)	target alteration	Macrolide/Lincosamide	Streptococcus mitis B6 (taxid 365659)	Streptococcus	k141_21896	1090	1938	600	8538.3
T1074B_31072005_D1_D2	1	RlmA(II)	target alteration	Macrolide/Lincosamide	Streptococcus mitis B6 (taxid 365659)	Streptococcus	k141_8392	1	716	27	455.694
T1074B_31072005_D1_D2	1	RlmA(II)	target alteration	Macrolide/Lincosamide	Streptococcus pneumoniae (taxid 1313)	Streptococcus	k141_1044	1089	1937	497	7072.56
T1074B_31072005_D1_D2	1	aph(2'')-Ih	inactivation	Aminoglycoside	Streptococcus mitis B6 (taxid 365659)	Streptococcus	k141_2943	1681	2477	0	0
T1074B_31072005_D1_D2	1	aph(3'')-Ib	inactivation	Aminoglycoside	Acinetobacter nosocomialis (taxid 106654)	Acinetobacter	k141_4819	479	1282	5	75.1399
T1074B_31072005_D1_D2	1	aph(3'')-Ib	inactivation	Aminoglycoside	Acinetobacter nosocomialis (taxid 106654)	Acinetobacter	k141_4819	480	1282	0	0
T1074B_31072005_D1_D2	1	blaCIA-4	inactivation	Beta-Lactam	Chryseobacterium indologenes (taxid 253)	Chryseobacterium	k141_6074	953177	954055	4374	60117.4
T1074B_31072005_D1_D2	1	blaIND-11	inactivation	Beta-Lactam	Chryseobacterium indologenes (taxid 253)	Chryseobacterium	k141_6074	548765	549496	3275	54064.2
T1074B_31072005_D1_D2	1	blaOXA-361	inactivation	Beta-Lactam	Acinetobacter lwoffii (taxid 28090)	Acinetobacter	k141_17198	4519	5349	208	3024.13
T1074B_31072005_D1_D2	1	catP	inactivation	Chloramphenicol	Streptococcus pneumoniae (taxid 1313)	Streptococcus	k141_25539	2336	3056	47	787.737
T1074B_31072005_D1_D2	1	erm(B)	target alteration	MLS	Streptococcus pneumoniae (taxid 1313)	Streptococcus	k141_18891	364	1095	0	0
T1074B_31072005_D1_D2	1	erm(B)	target alteration	MLS	Streptococcus pneumoniae (taxid 1313)	Streptococcus	k141_18891	372	1127	1	15.9834
T1074B_31072005_D1_D2	1	lnu(A)	inactivation	Lincosamide	Staphylococcus aureus (taxid 1280)	Staphylococcus	k141_13859	1670	2155	22	547.39
T1074B_31072005_D1_D2	1	mef(A)	efflux	Macrolide	Streptococcus pneumoniae (taxid 1313)	Streptococcus	k141_27913	18156	19373	7427	73644.2
T1074B_31072005_D1_D2	1	msr(D)	target protection	Macrolide	Streptococcus pneumoniae (taxid 1313)	Streptococcus	k141_27913	16573	18036	8992	74169.9
T1074B_31072005_D1_D2	1	patA	efflux	Fluoroquinolone	Streptococcus mitis B6 (taxid 365659)	Streptococcus	k141_12951	1449	3143	630	4487.9
T1074B_31072005_D1_D2	1	patA	efflux	Fluoroquinolone	Streptococcus mitis B6 (taxid 365659)	Streptococcus	k141_12953	911	2605	1125	8014.1
T1074B_31072005_D1_D2	1	patA	efflux	Fluoroquinolone	Streptococcus mitis B6 (taxid 365659)	Streptococcus	k141_14362	1	1441	1244	10424.9
T1074B_31072005_D1_D2	1	patA	efflux	Fluoroquinolone	Streptococcus mitis B6 (taxid 365659)	Streptococcus	k141_162	3339	5033	8568	61035.4
T1074B_31072005_D1_D2	1	patA	efflux	Fluoroquinolone	Streptococcus mitis B6 (taxid 365659)	Streptococcus	k141_26061	844	2538	625	4452.28
T1074B_31072005_D1_D2	1	sul2	target replacement	Sulfonamide	Acinetobacter cumulans (taxid 2136182)	Acinetobacter	k141_5132	435	1250	454	6722.24
T1074B_31072005_D1_D2	1	tet(M)	target protection	Tetracycline	Gemella haemolysans (taxid 1379)	Gemella	k141_14259	4979	6898	0	0
T1074B_31072005_D1_D2	1	tet(O)	target protection	Tetracycline	Gemella haemolysans (taxid 1379)	Gemella	k141_14259	4979	6898	0	0
T1117A_24112005_D1_D2	1	RlmA(II)	target alteration	Macrolide/Lincosamide	Streptococcus sp. 116-D4 (taxid 2598453)	Streptococcus	k141_30642	866	1714	95	9491.39
T1117A_24112005_D1_D2	1	RlmA(II)	target alteration	Macrolide/Lincosamide	Streptococcus sp. NPS 308 (taxid 1902136)	Streptococcus	k141_42477	959	1807	88	8792.03
T1117A_24112005_D1_D2	1	RlmA(II)	target alteration	Macrolide/Lincosamide	Streptococcus sp. oral taxon 431 (taxid 712633)	Streptococcus	k141_18886	6246	7094	286	28574.1
T1117A_24112005_D1_D2	1	RlmA(II)	target alteration	Macrolide/Lincosamide	Streptococcus sp. oral taxon 431 (taxid 712633)	Streptococcus	k141_41930	264	1112	100	9990.94
T1117A_24112005_D1_D2	1	catA16	inactivation	Chloramphenicol	Streptococcus salivarius (taxid 1304)	Streptococcus	k141_4035	173	819	9	1180.35
T1117A_24112005_D1_D2	1	cfxA3	inactivation	Beta-Lactam	Prevotella sp. oral taxon 299 str. F0039 (taxid 575614)	Prevotella	k141_33499	3461	4426	109	9569.77
T1117A_24112005_D1_D2	1	macB	efflux	Macrolide	Neisseria subflava (taxid 28449)	Neisseria	k141_12390	8397	10334	660	28868
T1117A_24112005_D1_D2	1	mef(A)	efflux	Macrolide	Streptococcus anginosus subsp. whileyi MAS624 (taxid 1353243)	Streptococcus	k141_45936	2356	3573	573	39890.2
T1117A_24112005_D1_D2	1	msr(D)	target protection	Macrolide	Streptococcus anginosus subsp. whileyi MAS624 (taxid 1353243)	Streptococcus	k141_45936	773	2236	675	39089.6
T1117A_24112005_D1_D2	1	patA	efflux	Fluoroquinolone	Streptococcus mitis B6 (taxid 365659)	Streptococcus	k141_621	3	1318	60	3865.7
T1117A_24112005_D1_D2	1	patA	efflux	Fluoroquinolone	Streptococcus sp. oral taxon 431 (taxid 712633)	Streptococcus	k141_9478	138	1694	268	14592.4
T1117A_24112005_D1_D2	1	patB	efflux	Fluoroquinolone	Streptococcus mitis B6 (taxid 365659)	Streptococcus	k141_13780	729	2495	122	5852.9
T1117A_24112005_D1_D2	1	patB	efflux	Fluoroquinolone	Streptococcus mitis B6 (taxid 365659)	Streptococcus	k141_20572	1075	2354	60	3974.5
T1117A_24112005_D1_D2	1	penA	inactivation	Beta-Lactam	Neisseria subflava (taxid 28449)	Neisseria	k141_41594	118497	120245	679	32910.2
T1117A_24112005_D1_D2	1	tetA(46)	efflux	Tetracycline	Streptococcus australis (taxid 113107)	Streptococcus	k141_4048	1	1674	44	2228.22
T1117A_24112005_D1_D2	1	tetA(60)	efflux	Tetracycline	Streptococcus sp. HSISS2 (taxid 1316411)	Streptococcus	k141_25128	85895	87634	153	7454.08
T1117A_24112005_D1_D2	1	tetB(46)	efflux	Tetracycline	Streptococcus sp. LPB0220 (taxid 2610896)	Streptococcus	k141_24030	101	1494	27	1642.16
T1117A_24112005_D1_D2	1	tetB(60)	efflux	Tetracycline	Streptococcus sp. HSISS2 (taxid 1316411)	Streptococcus	k141_25128	84159	85898	127	6187.37
T1117A_24112005_D1_D2	1	vanC	target alteration	Vancomycin	Enterococcus sp. CR-Ec1 (taxid 2057791)	Enterococcus	k141_29350	79181	80233	280	22549.9
T1117A_24112005_D1_D2	1	vanR-C	target alteration	Vancomycin	Enterococcus sp. CR-Ec1 (taxid 2057791)	Enterococcus	k141_29350	83000	83695	137	16700.8
T1117A_24112005_D1_D2	1	vanS-C	target alteration	Vancomycin	Enterococcus sp. CR-Ec1 (taxid 2057791)	Enterococcus	k141_29350	83685	84815	376	28191.1
T1117A_24112005_D1_D2	1	vanT-C	target alteration	Vancomycin	Enterococcus sp. CR-Ec1 (taxid 2057791)	Enterococcus	k141_29350	80799	82901	503	20273.9
T1117A_24112005_D1_D2	1	vanXY-C	target alteration	Vancomycin	Enterococcus sp. CR-Ec1 (taxid 2057791)	Enterococcus	k141_29350	80230	80802	86	12738.1
T1185B_27032006_D1_D2	1	FosA5	inactivation	Fosfomycin	Klebsiella oxytoca (taxid 571)	Klebsiella	k141_17953	27987	28398	0	0
T1185B_27032006_D1_D2	1	RlmA(II)	target alteration	Macrolide/Lincosamide	Streptococcus mitis (taxid 28037)	Streptococcus	k141_3649	1143	1991	35	364.001
T1185B_27032006_D1_D2	1	RlmA(II)	target alteration	Macrolide/Lincosamide	Streptococcus mitis B6 (taxid 365659)	Streptococcus	k141_15985	483	1331	39	405.602
T1185B_27032006_D1_D2	1	RlmA(II)	target alteration	Macrolide/Lincosamide	Streptococcus sp. oral taxon 431 (taxid 712633)	Streptococcus	k141_5760	640	1480	270	2834.75
T1185B_27032006_D1_D2	1	bacA	target alteration	Peptide	Klebsiella oxytoca (taxid 571)	Klebsiella	k141_24941	118985	119806	302	3244.1
T1185B_27032006_D1_D2	1	blaOXY-1-4	inactivation	Beta-Lactam	Klebsiella michiganensis KCTC 1686 (taxid 1006551)	Klebsiella	k141_7380	388743	389615	309	3125.16
T1185B_27032006_D1_D2	1	cfxA3	inactivation	Beta-Lactam	Prevotella scopos JCM 17725 (taxid 1236518)	Prevotella	k141_10967	54591	55556	119	1087.55
T1185B_27032006_D1_D2	1	fosA	inactivation	Fosfomycin	Klebsiella oxytoca (taxid 571)	Klebsiella	k141_17953	27987	28403	0	0
T1185B_27032006_D1_D2	1	macB	efflux	Macrolide	Neisseria subflava (taxid 28449)	Neisseria	k141_17552	8392	10329	218	992.562
T1185B_27032006_D1_D2	1	mef(A)	efflux	Macrolide	Streptococcus pneumoniae (taxid 1313)	Streptococcus	k141_14764	3115	4332	115	833.371
T1185B_27032006_D1_D2	1	msr(D)	target protection	Macrolide	Streptococcus pneumoniae (taxid 1313)	Streptococcus	k141_14764	1532	2995	133	801.749
T1185B_27032006_D1_D2	1	oqxA10	efflux	Phenicol/Quinolone	Klebsiella oxytoca (taxid 571)	Klebsiella	k141_5298	135741	136916	358	2687.05
T1185B_27032006_D1_D2	1	oqxB	efflux	Phenicol/Quinolone	Klebsiella oxytoca (taxid 571)	Klebsiella	k141_5298	132564	135716	0	0
T1185B_27032006_D1_D2	1	oqxB9	efflux	Phenicol/Quinolone	Klebsiella oxytoca (taxid 571)	Klebsiella	k141_5298	132564	135716	0	0
T1185B_27032006_D1_D2	1	patA	efflux	Fluoroquinolone	Streptococcus mitis B6 (taxid 365659)	Streptococcus	k141_23546	3626	5320	64	333.194
T1185B_27032006_D1_D2	1	patA	efflux	Fluoroquinolone	Streptococcus sp. oral taxon 431 (taxid 712633)	Streptococcus	k141_13801	17	1427	53	331.503
T1185B_27032006_D1_D2	1	patB	efflux	Fluoroquinolone	Streptococcus mitis B6 (taxid 365659)	Streptococcus	k141_23546	1846	3612	73	364.555
T1185B_27032006_D1_D2	1	penA	inactivation	Beta-Lactam	Neisseria subflava (taxid 28449)	Neisseria	k141_879	136568	138316	250	1261.33
T1185B_27032006_D1_D2	1	tetA(46)	efflux	Tetracycline	Streptococcus australis (taxid 113107)	Streptococcus	k141_12263	57	1436	23	147.094
T1190B_30032006_D1_D2	1	CfxA5	inactivation	Beta-Lactam	Prevotella intermedia (taxid 28131)	Prevotella	k141_19324	2058	3023	60	973.093
T1190B_30032006_D1_D2	1	RlmA(II)	target alteration	Macrolide/Lincosamide	Streptococcus mitis (taxid 28037)	Streptococcus	k141_9300	113	961	185	3414.34
T1190B_30032006_D1_D2	1	RlmA(II)	target alteration	Macrolide/Lincosamide	Streptococcus mitis B6 (taxid 365659)	Streptococcus	k141_5040	113	961	89	1642.57
T1190B_30032006_D1_D2	1	RlmA(II)	target alteration	Macrolide/Lincosamide	Streptococcus mitis B6 (taxid 365659)	Streptococcus	k141_8749	2402	3250	98	1808.68
T1190B_30032006_D1_D2	1	RlmA(II)	target alteration	Macrolide/Lincosamide	Streptococcus sp. JS71 (taxid 2382163)	Streptococcus	k141_11552	413	1261	40	738.235
T1190B_30032006_D1_D2	1	arnA	efflux	Peptide	Pseudomonas sp. MYb193 (taxid 1827300)	Pseudomonas	k141_1841	148441	150404	7693	61334.7
T1190B_30032006_D1_D2	1	blaI	inactivation	Beta-Lactam	Staphylococcus aureus (taxid 1280)	Staphylococcus	k141_14080	574	954	5	205.929
T1190B_30032006_D1_D2	1	catB	inactivation	Chloramphenicol	Streptococcus milleri (taxid 33040)	Streptococcus	k141_21600	1630	2118	0	0
T1190B_30032006_D1_D2	1	catP	inactivation	Chloramphenicol	Streptococcus milleri (taxid 33040)	Streptococcus	k141_21600	1557	2178	5	126.011
T1190B_30032006_D1_D2	1	catP	inactivation	Chloramphenicol	Streptococcus milleri (taxid 33040)	Streptococcus	k141_21600	1630	2118	0	0
T1190B_30032006_D1_D2	1	catP	inactivation	Chloramphenicol	Streptococcus pneumoniae Hungary19A-6 (taxid 487214)	Streptococcus	k141_26773	3644	4364	59	1282.48
T1190B_30032006_D1_D2	1	mef(A)	efflux	Macrolide	Streptococcus (taxid 1301)	Streptococcus	k141_23541	2041	3258	491	6314.25
T1190B_30032006_D1_D2	1	msr(D)	target protection	Macrolide	Streptococcus (taxid 1301)	Streptococcus	k141_23541	458	1921	580	6204.61
T1190B_30032006_D1_D2	1	patA	efflux	Fluoroquinolone	Streptococcus mitis B6 (taxid 365659)	Streptococcus	k141_1296	951	2645	264	2439.05
T1190B_30032006_D1_D2	1	patA	efflux	Fluoroquinolone	Streptococcus mitis B6 (taxid 365659)	Streptococcus	k141_2593	2457	4148	160	1480.84
T1190B_30032006_D1_D2	1	patA	efflux	Fluoroquinolone	Streptococcus mitis B6 (taxid 365659)	Streptococcus	k141_27730	11	1237	74	944.652
T1190B_30032006_D1_D2	1	patA	efflux	Fluoroquinolone	Streptococcus sp. oral taxon 431 (taxid 712633)	Streptococcus	k141_12699	4465	6159	55	508.136
T1190B_30032006_D1_D2	1	tet(M)	target protection	Tetracycline	Enterococcus faecalis (taxid 1351)	Enterococcus	k141_2406	1	1435	0	0
T1190B_30032006_D1_D2	1	tet(O)	target protection	Tetracycline	Enterococcus faecalis (taxid 1351)	Enterococcus	k141_2406	1	1435	0	0
T1190B_30032006_D1_D2	1	tet(O)	target protection	Tetracycline	Streptococcus sp. HSISM1 (taxid 1316408)	Streptococcus	k141_1470	52049	53968	283	2308.03
T1190B_30032006_D1_D2	1	tetA(46)	efflux	Tetracycline	Streptococcus sp. HSISM1 (taxid 1316408)	Streptococcus	k141_1470	23631	25355	207	1879.16
T1190B_30032006_D1_D2	1	tetA(60)	efflux	Tetracycline	Streptococcus sanguinis (taxid 1305)	Streptococcus	k141_24711	36105	37844	120	1079.97
T1190B_30032006_D1_D2	1	tetB(46)	efflux	Tetracycline	Streptococcus sp. HSISM1 (taxid 1316408)	Streptococcus	k141_1470	21900	23629	242	2190.54
T1190B_30032006_D1_D2	1	tetB(60)	efflux	Tetracycline	Streptococcus sanguinis (taxid 1305)	Streptococcus	k141_24711	37841	39580	97	872.977
T1198A_15052006_D1_D2	1	ANT(3'')-IIc	inactivation	Aminoglycoside	Acinetobacter ursingii (taxid 108980)	Acinetobacter	k141_4483	4737	5525	2	22.0087
T1198A_15052006_D1_D2	1	ANT(3'')-IIc	inactivation	Aminoglycoside	Acinetobacter ursingii (taxid 108980)	Acinetobacter	k141_4483	4756	5525	0	0
T1198A_15052006_D1_D2	1	APH(3')-Ib	inactivation	Aminoglycoside	Klebsiella michiganensis (taxid 1134687)	Klebsiella	k141_41650	2555	3370	0	0
T1198A_15052006_D1_D2	1	APH(6)-Id	inactivation	Aminoglycoside	Acinetobacter nosocomialis (taxid 106654)	Acinetobacter	k141_26378	998	1834	48	497.881
T1198A_15052006_D1_D2	1	FosA2	inactivation	Fosfomycin	Enterobacter cloacae (taxid 550)	Enterobacter	k141_34062	21887	22312	0	0
T1198A_15052006_D1_D2	1	FosA5	inactivation	Fosfomycin	Klebsiella oxytoca (taxid 571)	Klebsiella	k141_61386	2072	2483	0	0
T1198A_15052006_D1_D2	1	FosA5	inactivation	Fosfomycin	Raoultella terrigena (taxid 577)	Raoultella	k141_37038	91959	92378	0	0
T1198A_15052006_D1_D2	1	FosA6	inactivation	Fosfomycin	Klebsiella pneumoniae 30660/NJST258_1 (taxid 1420012)	Klebsiella	k141_45205	40975	41394	609	12603.6
T1198A_15052006_D1_D2	1	RlmA(II)	target alteration	Macrolide/Lincosamide	Streptococcus sp. oral taxon 431 (taxid 712633)	Streptococcus	k141_44554	20515	21356	99	1020.78
T1198A_15052006_D1_D2	1	aac(6')_Serra	inactivation	Aminoglycoside	Serratia plymuthica PRI-2C (taxid 1154756)	Serratia	k141_3876	87757	88190	0	0
T1198A_15052006_D1_D2	1	aadS	inactivation	Aminoglycoside	Chryseobacterium sp. H6466 (taxid 2487072)	Chryseobacterium	k141_33841	20368	21231	559	5616.84
T1198A_15052006_D1_D2	1	ant(3'')-IIa	inactivation	Aminoglycoside	Acinetobacter baumannii (taxid 470)	Acinetobacter	k141_26002	580	1368	14	154.061
T1198A_15052006_D1_D2	1	aph(3'')-Ib	inactivation	Aminoglycoside	Acinetobacter nosocomialis (taxid 106654)	Acinetobacter	k141_26378	195	998	0	0
T1198A_15052006_D1_D2	1	aph(3'')-Ib	inactivation	Aminoglycoside	Acinetobacter nosocomialis (taxid 106654)	Acinetobacter	k141_26378	196	998	0	0
T1198A_15052006_D1_D2	1	aph(3')-Ia	inactivation	Aminoglycoside	Klebsiella michiganensis (taxid 1134687)	Klebsiella	k141_41650	2555	3368	0	0
T1198A_15052006_D1_D2	1	aph(3')-Ia	inactivation	Aminoglycoside	Klebsiella michiganensis (taxid 1134687)	Klebsiella	k141_41650	2555	3370	0	0
T1198A_15052006_D1_D2	1	arnA	efflux	Peptide	Pseudomonas denitrificans (nomen rejiciendum) (taxid 43306)	Pseudomonas	k141_25557	16043	18006	103	454.996
T1198A_15052006_D1_D2	1	arnA	efflux	Peptide	Pseudomonas fluorescens WH6 (taxid 746360)	Pseudomonas	k141_23962	7269	9232	137	605.189
T1198A_15052006_D1_D2	1	bacA	target alteration	Peptide	Enterobacter cloacae (taxid 550)	Enterobacter	k141_23828	31811	32628	100	1061.37
T1198A_15052006_D1_D2	1	bacA	target alteration	Peptide	Enterobacter cloacae subsp. dissolvens SDM (taxid 1104326)	Enterobacter	k141_3215	9358	10163	203	2186.71
T1198A_15052006_D1_D2	1	bacA	target alteration	Peptide	Klebsiella pneumoniae subsp. pneumoniae 1084 (taxid 1193292)	Klebsiella	k141_20467	54277	55098	991	10467
T1198A_15052006_D1_D2	1	bacA	target alteration	Peptide	Raoultella terrigena (taxid 577)	Raoultella	k141_45316	11618	12439	231	2439.83
T1198A_15052006_D1_D2	1	blaACT-23	inactivation	Beta-Lactam	Enterobacter cloacae (taxid 550)	Enterobacter	k141_44825	5898	7043	0	0
T1198A_15052006_D1_D2	1	blaACT-67	inactivation	Beta-Lactam	Enterobacter cloacae (taxid 550)	Enterobacter	k141_44825	5898	7043	0	0
T1198A_15052006_D1_D2	1	blaADC-32	inactivation	Beta-Lactam	Acinetobacter baumannii (taxid 470)	Acinetobacter	k141_38799	214	1365	20	150.677
T1198A_15052006_D1_D2	1	blaESP-1	inactivation	Beta-Lactam	Chryseobacterium sp. F5649 (taxid 2487071)	Chryseobacterium	k141_32719	6504	7361	688	6961.43
T1198A_15052006_D1_D2	1	blaOCH-5	inactivation	Beta-Lactam	Ochrobactrum anthropi ATCC 49188 (taxid 439375)	Ochrobactrum	k141_33536	905	2075	14	103.761
T1198A_15052006_D1_D2	1	blaOXA-212	inactivation	Beta-Lactam	Acinetobacter johnsonii XBB1 (taxid 1242245)	Acinetobacter	k141_1631	1660	2484	215	2262.57
T1198A_15052006_D1_D2	1	blaOXA-283	inactivation	Beta-Lactam	Acinetobacter lwoffii (taxid 28090)	Acinetobacter	k141_31550	3720	4543	0	0
T1198A_15052006_D1_D2	1	blaOXA-496	inactivation	Beta-lactam	Acinetobacter lwoffii (taxid 28090)	Acinetobacter	k141_31550	3720	4559	2	20.6709
T1198A_15052006_D1_D2	1	blaOXA-648	inactivation	Beta-Lactam	Acinetobacter lwoffii (taxid 28090)	Acinetobacter	k141_31550	3720	4558	0	0
T1198A_15052006_D1_D2	1	blaOXY-1-3	inactivation	Beta-Lactam	Klebsiella michiganensis (taxid 1134687)	Klebsiella	k141_24918	112	987	29	287.396
T1198A_15052006_D1_D2	1	blaSHV-187	inactivation	Beta-Lactam	Klebsiella pneumoniae subsp. rhinoscleromatis SB3432 (taxid 861365)	Klebsiella	k141_18707	12968	13834	1080	10814.3
T1198A_15052006_D1_D2	1	blaSPR-1	inactivation	Beta-Lactam	Serratia liquefaciens ATCC 27592 (taxid 1346614)	Serratia	k141_62940	27746	28629	808	7934.9
T1198A_15052006_D1_D2	1	blaTEM-19	inactivation	Beta-Lactam	Gammaproteobacteria (taxid 1236)	Gammaproteobacteria	k141_37690	1	678	7	89.6603
T1198A_15052006_D1_D2	1	blaTER-2	inactivation	Beta-Lactam	Raoultella terrigena (taxid 577)	Raoultella	k141_3933	120704	121558	182	1848.01
T1198A_15052006_D1_D2	1	cfxA3	inactivation	Beta-Lactam	Bacteroidales (taxid 171549)	Bacteroidales	k141_6943	115	1080	21	188.705
T1198A_15052006_D1_D2	1	erm(B)	target alteration	MLS	Streptococcus sp. oral taxon 431 (taxid 712633)	Streptococcus	k141_62255	25783	26545	7	79.6588
T1198A_15052006_D1_D2	1	erm(B)	target alteration	MLS	Streptococcus sp. oral taxon 431 (taxid 712633)	Streptococcus	k141_62255	25808	26545	0	0
T1198A_15052006_D1_D2	1	fosA	inactivation	Fosfomycin	Enterobacter cloacae (taxid 550)	Enterobacter	k141_34062	21887	22312	0	0
T1198A_15052006_D1_D2	1	fosA	inactivation	Fosfomycin	Klebsiella oxytoca (taxid 571)	Klebsiella	k141_61386	2072	2488	0	0
T1198A_15052006_D1_D2	1	fosA	inactivation	Fosfomycin	Raoultella terrigena (taxid 577)	Raoultella	k141_37038	91959	92378	0	0
T1198A_15052006_D1_D2	1	mef(A)	efflux	Macrolide	Streptococcus gordonii (taxid 1302)	Streptococcus	k141_37517	3457	4674	63	448.891
T1198A_15052006_D1_D2	1	msr(D)	target protection	Macrolide	Streptococcus gordonii (taxid 1302)	Streptococcus	k141_37517	1874	3337	41	243.013
T1198A_15052006_D1_D2	1	oqxA10	efflux	Phenicol/Quinolone	Enterobacter cloacae (taxid 550)	Enterobacter	k141_2988	29793	30954	21	156.848
T1198A_15052006_D1_D2	1	oqxA10	efflux	Phenicol/Quinolone	Klebsiella pneumoniae subsp. pneumoniae Kp13 (taxid 1123862)	Klebsiella	k141_53246	3881	5056	0	0
T1198A_15052006_D1_D2	1	oqxA10	efflux	Phenicol/Quinolone	Raoultella terrigena (taxid 577)	Raoultella	k141_2206	7485	8672	230	1680.23
T1198A_15052006_D1_D2	1	oqxA3	efflux	Phenicol/Quinolone	Klebsiella pneumoniae subsp. pneumoniae Kp13 (taxid 1123862)	Klebsiella	k141_53246	3881	5056	0	0
T1198A_15052006_D1_D2	1	oqxB	efflux	Phenicol/Quinolone	Enterobacter cloacae (taxid 550)	Enterobacter	k141_2988	26649	29768	0	0
T1198A_15052006_D1_D2	1	oqxB	efflux	Phenicol/Quinolone	Klebsiella pneumoniae subsp. pneumoniae Kp13 (taxid 1123862)	Klebsiella	k141_53246	5080	8232	0	0
T1198A_15052006_D1_D2	1	oqxB	efflux	Phenicol/Quinolone	Raoultella terrigena (taxid 577)	Raoultella	k141_2206	8696	11846	0	0
T1198A_15052006_D1_D2	1	oqxB24	efflux	Phenicol/Quinolone	Klebsiella pneumoniae subsp. pneumoniae Kp13 (taxid 1123862)	Klebsiella	k141_53246	5080	8232	0	0
T1198A_15052006_D1_D2	1	oqxB5	efflux	Phenicol/Quinolone	Enterobacter cloacae (taxid 550)	Enterobacter	k141_2988	26616	29768	2	5.50218
T1198A_15052006_D1_D2	1	oqxB9	efflux	Phenicol/Quinolone	Raoultella terrigena (taxid 577)	Raoultella	k141_2206	8696	11846	0	0
T1198A_15052006_D1_D2	1	oqxB9	efflux	Phenicol/Quinolone	Serratia liquefaciens ATCC 27592 (taxid 1346614)	Serratia	k141_19157	142704	145807	4	11.1781
T1198A_15052006_D1_D2	1	qnrE1	target protection	Fluoroquinolone	Serratia liquefaciens ATCC 27592 (taxid 1346614)	Serratia	k141_19157	17253	17884	708	9729.59
T1198A_15052006_D1_D2	1	sul2	target replacement	Sulfonamide	Acinetobacter nosocomialis (taxid 106654)	Acinetobacter	k141_26378	4979	5794	64	680.947
T1198A_15052006_D1_D2	1	tet(M)	target protection	Tetracycline	Streptococcus sp. oral taxon 431 (taxid 712633)	Streptococcus	k141_62255	22782	24701	0	0
T1198A_15052006_D1_D2	1	tet(O)	target protection	Tetracycline	Streptococcus sp. oral taxon 431 (taxid 712633)	Streptococcus	k141_62255	22782	24701	0	0
T1198A_15052006_D1_D2	1	tet(S)	target protection	Tetracycline	Streptococcus parauberis (taxid 1348)	Streptococcus	k141_19958	1820	3760	0	0
T1198A_15052006_D1_D2	1	tet(S)	target protection	Tetracycline	Streptococcus parauberis (taxid 1348)	Streptococcus	k141_19958	1835	3760	0	0
T1198A_15052006_D1_D2	1	tetA(46)	efflux	Tetracycline	Streptococcus parasanguinis FW213 (taxid 1114965)	Streptococcus	k141_34731	226	1950	28	140.835
T1198A_15052006_D1_D2	1	tetB(46)	efflux	Tetracycline	Streptococcus sp. HSISM1 (taxid 1316408)	Streptococcus	k141_10281	85	1740	26	136.228
T1198B_15052006_D1_D2	1	FosA5	inactivation	Fosfomycin	Raoultella terrigena (taxid 577)	Raoultella	k141_26788	334644	335063	0	0
T1198B_15052006_D1_D2	1	RlmA(II)	target alteration	Macrolide/Lincosamide	Streptococcus mitis (taxid 28037)	Streptococcus	k141_31170	3633	4466	53	729.538
T1198B_15052006_D1_D2	1	RlmA(II)	target alteration	Macrolide/Lincosamide	Streptococcus mitis B6 (taxid 365659)	Streptococcus	k141_13278	1	773	9	133.672
T1198B_15052006_D1_D2	1	aac(6')_Serra	inactivation	Aminoglycoside	Serratia plymuthica PRI-2C (taxid 1154756)	Serratia	k141_43904	227254	227687	0	0
T1198B_15052006_D1_D2	1	bacA	target alteration	Peptide	Raoultella terrigena (taxid 577)	Raoultella	k141_51969	203455	204276	1231	17192.2
T1198B_15052006_D1_D2	1	blaCSP-1	inactivation	Beta-Lactam	Chryseobacterium gleum (taxid 250)	Chryseobacterium	k141_55713	661	1542	0	0
T1198B_15052006_D1_D2	1	blaCSP-1	inactivation	Beta-Lactam	Chryseobacterium gleum (taxid 250)	Chryseobacterium	k141_55713	661	1554	0	0
T1198B_15052006_D1_D2	1	blaSPR-1	inactivation	Beta-Lactam	Serratia liquefaciens ATCC 27592 (taxid 1346614)	Serratia	k141_24651	27746	28629	2240	29087.3
T1198B_15052006_D1_D2	1	blaTEM-1	inactivation	Beta-Lactam	Proteobacteria (taxid 1224)	Proteobacteria	k141_38810	1	798	0	0
T1198B_15052006_D1_D2	1	blaTEM-26	inactivation	Beta-Lactam	Proteobacteria (taxid 1224)	Proteobacteria	k141_38810	1	798	0	0
T1198B_15052006_D1_D2	1	blaTER-2	inactivation	Beta-Lactam	Raoultella terrigena (taxid 577)	Raoultella	k141_44676	217646	218500	1060	14232
T1198B_15052006_D1_D2	1	cfxA3	inactivation	Beta-Lactam	Prevotella jejuni (taxid 1177574)	Prevotella	k141_25080	10886	11851	492	5845.94
T1198B_15052006_D1_D2	1	erm(B)	target alteration	MLS	Streptococcus salivarius JIM8777 (taxid 347253)	Streptococcus	k141_36820	1541	2303	3	45.1422
T1198B_15052006_D1_D2	1	erm(B)	target alteration	MLS	Streptococcus salivarius JIM8777 (taxid 347253)	Streptococcus	k141_36820	1566	2303	0	0
T1198B_15052006_D1_D2	1	fosA	inactivation	Fosfomycin	Raoultella terrigena (taxid 577)	Raoultella	k141_26788	334644	335063	0	0
T1198B_15052006_D1_D2	1	mef(A)	efflux	Macrolide	Streptococcus australis (taxid 113107)	Streptococcus	k141_44019	10111	11328	532	5012.31
T1198B_15052006_D1_D2	1	msr(D)	target protection	Macrolide	Streptococcus australis (taxid 113107)	Streptococcus	k141_44019	8528	9991	615	4820.01
T1198B_15052006_D1_D2	1	oqxA10	efflux	Phenicol/Quinolone	Raoultella terrigena (taxid 577)	Raoultella	k141_56781	38664	39851	1454	14045.3
T1198B_15052006_D1_D2	1	oqxB	efflux	Phenicol/Quinolone	Raoultella terrigena (taxid 577)	Raoultella	k141_56781	35490	38640	0	0
T1198B_15052006_D1_D2	1	oqxB9	efflux	Phenicol/Quinolone	Raoultella terrigena (taxid 577)	Raoultella	k141_56781	35490	38640	0	0
T1198B_15052006_D1_D2	1	oqxB9	efflux	Phenicol/Quinolone	Serratia liquefaciens ATCC 27592 (taxid 1346614)	Serratia	k141_61334	142704	145807	13	48.0373
T1198B_15052006_D1_D2	1	patA	efflux	Fluoroquinolone	Streptococcus mitis B6 (taxid 365659)	Streptococcus	k141_71202	3792	5486	83	561.8
T1198B_15052006_D1_D2	1	patB	efflux	Fluoroquinolone	Streptococcus mitis B6 (taxid 365659)	Streptococcus	k141_71202	2012	3778	92	597.329
T1198B_15052006_D1_D2	1	qnrE1	target protection	Fluoroquinolone	Serratia liquefaciens ATCC 27592 (taxid 1346614)	Serratia	k141_61334	17253	17884	2106	38268.9
T1198B_15052006_D1_D2	1	tet(M)	target protection	Tetracycline	Enterococcus sp. HSIEG1 (taxid 1316414)	Enterococcus	k141_39336	1579	3498	0	0
T1198B_15052006_D1_D2	1	tet(O)	target protection	Tetracycline	Enterococcus sp. HSIEG1 (taxid 1316414)	Enterococcus	k141_39336	1579	3498	0	0
T1198B_15052006_D1_D2	1	tetA(46)	efflux	Tetracycline	Streptococcus australis (taxid 113107)	Streptococcus	k141_39022	82	1325	51	470.453
T1198B_15052006_D1_D2	1	tetA(46)	efflux	Tetracycline	Streptococcus parasanguinis FW213 (taxid 1114965)	Streptococcus	k141_67659	3656	5380	460	3059.41
T1198B_15052006_D1_D2	1	tetA(60)	efflux	Tetracycline	Terrabacteria group (taxid 1783272)	Terrabacteria	k141_66625	1	1677	33	225.765
T1198B_15052006_D1_D2	1	tetB(46)	efflux	Tetracycline	Streptococcus parasanguinis FW213 (taxid 1114965)	Streptococcus	k141_67659	5382	7113	497	3292.12
T1229A_2072006_D1_D2	1	FosA5	inactivation	Fosfomycin	Klebsiella oxytoca (taxid 571)	Klebsiella	k141_15618	28225	28636	0	0
T1229A_2072006_D1_D2	1	RlmA(II)	target alteration	Macrolide/Lincosamide	Streptococcus mitis B6 (taxid 365659)	Streptococcus	k141_12017	600	1448	44	267.041
T1229A_2072006_D1_D2	1	RlmA(II)	target alteration	Macrolide/Lincosamide	Streptococcus sp. oral taxon 431 (taxid 712633)	Streptococcus	k141_20596	19004	19853	144	872.924
T1229A_2072006_D1_D2	1	bacA	target alteration	Peptide	Klebsiella oxytoca (taxid 571)	Klebsiella	k141_14505	109850	110671	4797	30071
T1229A_2072006_D1_D2	1	blaOXY-2-1	inactivation	Beta-Lactam	Klebsiella oxytoca (taxid 571)	Klebsiella	k141_15347	288191	289063	5068	29911.7
T1229A_2072006_D1_D2	1	catA7	inactivation	Chloramphenicol	Enterococcus (taxid 1350)	Enterococcus	k141_26624	2453	3100	120	954.55
T1229A_2072006_D1_D2	1	catA8	inactivation	Chloramphenicol	Staphylococcus epidermidis (taxid 1282)	Staphylococcus	k141_9659	1597	2244	144	1145.46
T1229A_2072006_D1_D2	1	erm(C)	target alteration	MLS	Staphylococcus aureus (taxid 1280)	Staphylococcus	k141_14020	560	1294	22	154.258
T1229A_2072006_D1_D2	1	fosA	inactivation	Fosfomycin	Klebsiella oxytoca (taxid 571)	Klebsiella	k141_15618	28225	28641	11	136.088
T1229A_2072006_D1_D2	1	mef(A)	efflux	Macrolide	Streptococcus dysgalactiae (taxid 1334)	Streptococcus	k141_9350	3190	4407	156	659.714
T1229A_2072006_D1_D2	1	msr(D)	target protection	Macrolide	Streptococcus dysgalactiae (taxid 1334)	Streptococcus	k141_9350	1607	3070	255	897.052
T1229A_2072006_D1_D2	1	oqxA10	efflux	Phenicol/Quinolone	Klebsiella oxytoca (taxid 571)	Klebsiella	k141_7863	67092	68267	5274	23100.6
T1229A_2072006_D1_D2	1	oqxB	efflux	Phenicol/Quinolone	Klebsiella oxytoca (taxid 571)	Klebsiella	k141_7863	68291	71443	0	0
T1229A_2072006_D1_D2	1	oqxB	efflux	Phenicol/Quinolone	Pantoea vagans C9-1 (taxid 712898)	Pantoea	k141_8315	451808	454930	0	0
T1229A_2072006_D1_D2	1	oqxB20	efflux	Phenicol/Quinolone	Pantoea vagans C9-1 (taxid 712898)	Pantoea	k141_8315	451808	454930	0	0
T1229A_2072006_D1_D2	1	oqxB9	efflux	Phenicol/Quinolone	Klebsiella oxytoca (taxid 571)	Klebsiella	k141_7863	68291	71443	0	0
T1229A_2072006_D1_D2	1	patA	efflux	Fluoroquinolone	Streptococcus sp. oral taxon 431 (taxid 712633)	Streptococcus	k141_2998	22375	24069	183	555.98
T1229A_2072006_D1_D2	1	tet(K)	efflux	Tetracycline	Staphylococcus warneri (taxid 1292)	Staphylococcus	k141_26623	2469	3848	349	1302.52
T1229A_2072006_D1_D2	1	tet(W)	target protection	Tetracycline	Rothia mucilaginosa (taxid 43675)	Rothia	k141_18407	428	2331	0	0
T1229A_2072006_D1_D2	1	tet(W)	target protection	Tetracycline	Rothia mucilaginosa (taxid 43675)	Rothia	k141_18407	428	2340	0	0
T1229A_2072006_D1_D2	1	tet(W)	target protection	Tetracycline	Rothia mucilaginosa (taxid 43675)	Rothia	k141_18407	428	2350	0	0
T1229A_2072006_D1_D2	1	tetA(46)	efflux	Tetracycline	Streptococcus sp. HSISM1 (taxid 1316408)	Streptococcus	k141_16016	35542	37266	91	271.66
T1229A_2072006_D1_D2	1	tetA(60)	efflux	Tetracycline	Streptococcus gordonii (taxid 1302)	Streptococcus	k141_24371	4562	6301	66	195.329
T1229A_2072006_D1_D2	1	tetB(46)	efflux	Tetracycline	Streptococcus sp. HSISM1 (taxid 1316408)	Streptococcus	k141_16016	37268	38999	82	243.803
T1229A_2072006_D1_D2	1	tetB(60)	efflux	Tetracycline	Streptococcus gordonii (taxid 1302)	Streptococcus	k141_24371	2826	4565	69	204.207
T1229B_2072006_D1_D2	1	FosA5	inactivation	Fosfomycin	Klebsiella oxytoca (taxid 571)	Klebsiella	k141_8741	10660	11071	0	0
T1229B_2072006_D1_D2	1	RlmA(II)	target alteration	Macrolide/Lincosamide	Streptococcus mitis B6 (taxid 365659)	Streptococcus	k141_18330	2380	3228	92	410.178
T1229B_2072006_D1_D2	1	RlmA(II)	target alteration	Macrolide/Lincosamide	Streptococcus sp. oral taxon 431 (taxid 712633)	Streptococcus	k141_11074	19004	19853	325	1447.29
T1229B_2072006_D1_D2	1	bacA	target alteration	Peptide	Klebsiella oxytoca (taxid 571)	Klebsiella	k141_317	68592	69413	7523	34644
T1229B_2072006_D1_D2	1	blaOXY-2-1	inactivation	Beta-Lactam	Klebsiella oxytoca (taxid 571)	Klebsiella	k141_14502	89298	90170	7084	30714.4
T1229B_2072006_D1_D2	1	fosA	inactivation	Fosfomycin	Klebsiella oxytoca (taxid 571)	Klebsiella	k141_8741	10655	11071	21	190.856
T1229B_2072006_D1_D2	1	lsa(C)	target protection	Lincosamide/Streptogramin	Veillonella atypica (taxid 39777)	Veillonella	k141_8599	1603	3081	65	166.272
T1229B_2072006_D1_D2	1	mef(A)	efflux	Macrolide	Streptococcus sp. oral taxon 431 (taxid 712633)	Streptococcus	k141_18144	1107	2324	275	854.324
T1229B_2072006_D1_D2	1	msr(D)	target protection	Macrolide	Streptococcus sp. oral taxon 431 (taxid 712633)	Streptococcus	k141_18144	2444	3907	325	839.885
T1229B_2072006_D1_D2	1	oqxA10	efflux	Phenicol/Quinolone	Klebsiella oxytoca (taxid 571)	Klebsiella	k141_10836	67092	68267	7072	22755.4
T1229B_2072006_D1_D2	1	oqxB	efflux	Phenicol/Quinolone	Klebsiella oxytoca (taxid 571)	Klebsiella	k141_10836	68291	71443	0	0
T1229B_2072006_D1_D2	1	oqxB	efflux	Phenicol/Quinolone	Pantoea sp. PSNIH1 (taxid 1484158)	Pantoea	k141_18030	22050	25169	0	0
T1229B_2072006_D1_D2	1	oqxB9	efflux	Phenicol/Quinolone	Klebsiella oxytoca (taxid 571)	Klebsiella	k141_10836	68291	71443	0	0
T1229B_2072006_D1_D2	1	oqxB9	efflux	Phenicol/Quinolone	Pantoea sp. PSNIH1 (taxid 1484158)	Pantoea	k141_18030	22050	25169	0	0
T1229B_2072006_D1_D2	1	patA	efflux	Fluoroquinolone	Streptococcus mitis B6 (taxid 365659)	Streptococcus	k141_11183	494	2188	117	261.128
T1229B_2072006_D1_D2	1	patA	efflux	Fluoroquinolone	Streptococcus mitis B6 (taxid 365659)	Streptococcus	k141_7425	1	1480	23	58.795
T1229B_2072006_D1_D2	1	patA	efflux	Fluoroquinolone	Streptococcus sp. oral taxon 431 (taxid 712633)	Streptococcus	k141_15908	13834	15528	421	939.614
T1229B_2072006_D1_D2	1	patB	efflux	Fluoroquinolone	Streptococcus mitis B6 (taxid 365659)	Streptococcus	k141_4409	4293	5720	120	317.935
T1229B_2072006_D1_D2	1	tet(O)	target protection	Tetracycline	Streptococcus pneumoniae Hungary19A-6 (taxid 487214)	Streptococcus	k141_16440	4913	6832	86	169.435
T1229B_2072006_D1_D2	1	tetA(60)	efflux	Tetracycline	Streptococcus salivarius JIM8777 (taxid 347253)	Streptococcus	k141_448	3652	5391	75	163.058
T1229B_2072006_D1_D2	1	tetB(46)	efflux	Tetracycline	Streptococcus sp. HSISM1 (taxid 1316408)	Streptococcus	k141_249	324	2055	44	96.1029
T1229B_2072006_D1_D2	1	tetB(60)	efflux	Tetracycline	Streptococcus salivarius JIM8777 (taxid 347253)	Streptococcus	k141_448	5388	7127	87	189.147
T1236A_6072006_D1_D2	1	FosA5	inactivation	Fosfomycin	Klebsiella oxytoca (taxid 571)	Klebsiella	k141_32748	147760	148171	0	0
T1236A_6072006_D1_D2	1	RlmA(II)	target alteration	Macrolide/Lincosamide	Streptococcus mitis B6 (taxid 365659)	Streptococcus	k141_1230	2036	2884	478	2924.88
T1236A_6072006_D1_D2	1	RlmA(II)	target alteration	Macrolide/Lincosamide	Streptococcus mitis B6 (taxid 365659)	Streptococcus	k141_32143	260	1108	38	232.522
T1236A_6072006_D1_D2	1	RlmA(II)	target alteration	Macrolide/Lincosamide	Streptococcus pneumoniae (taxid 1313)	Streptococcus	k141_1556	2086	2934	165	1009.63
T1236A_6072006_D1_D2	1	RlmA(II)	target alteration	Macrolide/Lincosamide	Streptococcus sp. 116-D4 (taxid 2598453)	Streptococcus	k141_2483	18287	19135	488	2986.07
T1236A_6072006_D1_D2	1	RlmA(II)	target alteration	Macrolide/Lincosamide	Streptococcus sp. LPB0220 (taxid 2610896)	Streptococcus	k141_30077	8835	9674	1356	8386.37
T1236A_6072006_D1_D2	1	RlmA(II)	target alteration	Macrolide/Lincosamide	Streptococcus sp. oral taxon 431 (taxid 712633)	Streptococcus	k141_7235	48	804	12	82.3636
T1236A_6072006_D1_D2	1	bacA	target alteration	Peptide	Klebsiella oxytoca (taxid 571)	Klebsiella	k141_4002	13878	14699	4514	28529.5
T1236A_6072006_D1_D2	1	blaOXY-6-1	inactivation	Beta-Lactam	Klebsiella oxytoca (taxid 571)	Klebsiella	k141_8245	265905	266780	4658	27622.8
T1236A_6072006_D1_D2	1	cfxA3	inactivation	Beta-Lactam	Parabacteroides distasonis ATCC 8503 (taxid 435591)	Parabacteroides	k141_43656	94	1059	88	473.186
T1236A_6072006_D1_D2	1	fosA	inactivation	Fosfomycin	Klebsiella oxytoca (taxid 571)	Klebsiella	k141_32748	147755	148171	2	24.9467
T1236A_6072006_D1_D2	1	mef(A)	efflux	Macrolide	Streptococcus dysgalactiae (taxid 1334)	Streptococcus	k141_14068	3190	4407	432	1841.91
T1236A_6072006_D1_D2	1	msr(D)	target protection	Macrolide	Streptococcus dysgalactiae (taxid 1334)	Streptococcus	k141_14068	1607	3070	465	1649.24
T1236A_6072006_D1_D2	1	oqxA10	efflux	Phenicol/Quinolone	Klebsiella oxytoca (taxid 571)	Klebsiella	k141_13842	33210	34385	3929	17350.8
T1236A_6072006_D1_D2	1	oqxB	efflux	Phenicol/Quinolone	Klebsiella oxytoca (taxid 571)	Klebsiella	k141_13842	34409	37561	0	0
T1236A_6072006_D1_D2	1	oqxB20	efflux	Phenicol/Quinolone	Klebsiella oxytoca (taxid 571)	Klebsiella	k141_13842	34409	37561	0	0
T1236A_6072006_D1_D2	1	patA	efflux	Fluoroquinolone	Streptococcus mitis B6 (taxid 365659)	Streptococcus	k141_27820	3348	5042	946	2897.7
T1236A_6072006_D1_D2	1	patB	efflux	Fluoroquinolone	Streptococcus mitis B6 (taxid 365659)	Streptococcus	k141_18992	1950	3716	265	778.63
T1236A_6072006_D1_D2	1	patB	efflux	Fluoroquinolone	Streptococcus mitis B6 (taxid 365659)	Streptococcus	k141_27820	1568	3334	1726	5071.38
T1236A_6072006_D1_D2	1	patB	efflux	Fluoroquinolone	Streptococcus mitis B6 (taxid 365659)	Streptococcus	k141_32838	3109	4875	635	1865.77
T1236A_6072006_D1_D2	1	tet(M)	target protection	Tetracycline	Streptococcus sp. HSISM1 (taxid 1316408)	Streptococcus	k141_32709	2062	3981	0	0
T1236A_6072006_D1_D2	1	tet(O)	target protection	Tetracycline	Streptococcus sp. HSISM1 (taxid 1316408)	Streptococcus	k141_1229	10743	12662	348	940.98
T1236A_6072006_D1_D2	1	tet(O)	target protection	Tetracycline	Streptococcus sp. HSISM1 (taxid 1316408)	Streptococcus	k141_32709	2062	3981	0	0
T1236A_6072006_D1_D2	1	tet(Q)	target protection	Tetracycline	Bacteroidales (taxid 171549)	Bacteroidales	k141_1525	184	2145	0	0
T1236A_6072006_D1_D2	1	tet(Q)	target protection	Tetracycline	Bacteroidales (taxid 171549)	Bacteroidales	k141_1525	220	2193	3	7.88988
T1236A_6072006_D1_D2	1	tetA(46)	efflux	Tetracycline	Streptococcus parasanguinis FW213 (taxid 1114965)	Streptococcus	k141_29544	936	2425	30	104.545
T1236A_6072006_D1_D2	1	tetA(46)	efflux	Tetracycline	Streptococcus sp. HSISM1 (taxid 1316408)	Streptococcus	k141_35530	4297	6021	284	854.786
T1236A_6072006_D1_D2	1	tetA(46)	efflux	Tetracycline	Streptococcus sp. HSISM1 (taxid 1316408)	Streptococcus	k141_40192	6211	7935	170	511.667
T1236A_6072006_D1_D2	1	tetA(60)	efflux	Tetracycline	Streptococcus gordonii (taxid 1302)	Streptococcus	k141_18377	12824	14563	59	176.047
T1236A_6072006_D1_D2	1	tetB(46)	efflux	Tetracycline	Streptococcus sp. HSISM1 (taxid 1316408)	Streptococcus	k141_35530	6023	7752	258	774.285
T1236A_6072006_D1_D2	1	tetB(46)	efflux	Tetracycline	Streptococcus sp. HSISM1 (taxid 1316408)	Streptococcus	k141_40192	7937	9666	185	555.204
T1236A_6072006_D1_D2	1	tetB(60)	efflux	Tetracycline	Streptococcus gordonii (taxid 1302)	Streptococcus	k141_18377	11088	12827	72	214.837
T1236B_6072006_D1_D2	1	FosA5	inactivation	Fosfomycin	Klebsiella oxytoca (taxid 571)	Klebsiella	k141_1698	147785	148196	0	0
T1236B_6072006_D1_D2	1	RlmA(II)	target alteration	Macrolide/Lincosamide	Streptococcus mitis (taxid 28037)	Streptococcus	k141_8618	1	643	24	215.724
T1236B_6072006_D1_D2	1	RlmA(II)	target alteration	Macrolide/Lincosamide	Streptococcus mitis B6 (taxid 365659)	Streptococcus	k141_1192	1276	2124	641	4361.99
T1236B_6072006_D1_D2	1	RlmA(II)	target alteration	Macrolide/Lincosamide	Streptococcus mitis B6 (taxid 365659)	Streptococcus	k141_27774	818	1666	353	2402.16
T1236B_6072006_D1_D2	1	RlmA(II)	target alteration	Macrolide/Lincosamide	Streptococcus oralis ATCC 35037 (taxid 655813)	Streptococcus	k141_53211	1	819	36	253.964
T1236B_6072006_D1_D2	1	RlmA(II)	target alteration	Macrolide/Lincosamide	Streptococcus pneumoniae (taxid 1313)	Streptococcus	k141_1275	180	1028	59	401.494
T1236B_6072006_D1_D2	1	RlmA(II)	target alteration	Macrolide/Lincosamide	Streptococcus pneumoniae (taxid 1313)	Streptococcus	k141_33854	1259	2107	303	2061.91
T1236B_6072006_D1_D2	1	RlmA(II)	target alteration	Macrolide/Lincosamide	Streptococcus sp. HSISM1 (taxid 1316408)	Streptococcus	k141_50283	3370	4218	330	2245.64
T1236B_6072006_D1_D2	1	RlmA(II)	target alteration	Macrolide/Lincosamide	Streptococcus sp. oral taxon 431 (taxid 712633)	Streptococcus	k141_41028	2	658	29	255.104
T1236B_6072006_D1_D2	1	RlmA(II)	target alteration	Macrolide/Lincosamide	Streptococcus sp. oral taxon 431 (taxid 712633)	Streptococcus	k141_45616	131	874	27	209.7
T1236B_6072006_D1_D2	1	RlmA(II)	target alteration	Macrolide/Lincosamide	Streptococcus sp. oral taxon 431 (taxid 712633)	Streptococcus	k141_636	332	1173	31	212.71
T1236B_6072006_D1_D2	1	bacA	target alteration	Peptide	Klebsiella oxytoca (taxid 571)	Klebsiella	k141_2834	13878	14699	3506	24642.9
T1236B_6072006_D1_D2	1	blaOXY-6-1	inactivation	Beta-Lactam	Klebsiella oxytoca (taxid 571)	Klebsiella	k141_25908	552930	553805	3536	23319.9
T1236B_6072006_D1_D2	1	catP	inactivation	Chloramphenicol	Streptococcus pneumoniae Hungary19A-6 (taxid 487214)	Streptococcus	k141_35817	8558	9278	201	1610.97
T1236B_6072006_D1_D2	1	cfxA3	inactivation	Beta-Lactam	Bacteroidetes (taxid 976)	Bacteroidetes	k141_50960	1	878	98	644.836
T1236B_6072006_D1_D2	1	fosA	inactivation	Fosfomycin	Klebsiella oxytoca (taxid 571)	Klebsiella	k141_1698	147780	148196	3	41.6151
T1236B_6072006_D1_D2	1	mef(A)	efflux	Macrolide	Streptococcus (taxid 1301)	Streptococcus	k141_19220	2326	3543	838	3973.53
T1236B_6072006_D1_D2	1	msr(D)	target protection	Macrolide	Streptococcus (taxid 1301)	Streptococcus	k141_19220	743	2206	1099	4334.87
T1236B_6072006_D1_D2	1	oqxA10	efflux	Phenicol/Quinolone	Klebsiella oxytoca (taxid 571)	Klebsiella	k141_20804	33210	34385	3437	16879.7
T1236B_6072006_D1_D2	1	oqxB	efflux	Phenicol/Quinolone	Klebsiella oxytoca (taxid 571)	Klebsiella	k141_20804	34409	37561	0	0
T1236B_6072006_D1_D2	1	oqxB	efflux	Phenicol/Quinolone	Pantoea vagans C9-1 (taxid 712898)	Pantoea	k141_19307	621782	624904	0	0
T1236B_6072006_D1_D2	1	oqxB20	efflux	Phenicol/Quinolone	Klebsiella oxytoca (taxid 571)	Klebsiella	k141_20804	34409	37561	0	0
T1236B_6072006_D1_D2	1	oqxB20	efflux	Phenicol/Quinolone	Pantoea vagans C9-1 (taxid 712898)	Pantoea	k141_19307	621782	624904	0	0
T1236B_6072006_D1_D2	1	patA	efflux	Fluoroquinolone	Streptococcus mitis B6 (taxid 365659)	Streptococcus	k141_24048	3876	5570	381	1297.88
T1236B_6072006_D1_D2	1	patA	efflux	Fluoroquinolone	Streptococcus mitis B6 (taxid 365659)	Streptococcus	k141_24481	2141	3835	696	2370.93
T1236B_6072006_D1_D2	1	patA	efflux	Fluoroquinolone	Streptococcus mitis B6 (taxid 365659)	Streptococcus	k141_25349	2038	3732	355	1209.31
T1236B_6072006_D1_D2	1	patB	efflux	Fluoroquinolone	Streptococcus mitis B6 (taxid 365659)	Streptococcus	k141_21217	1683	2915	151	707.276
T1236B_6072006_D1_D2	1	patB	efflux	Fluoroquinolone	Streptococcus mitis B6 (taxid 365659)	Streptococcus	k141_24048	5584	7350	290	947.611
T1236B_6072006_D1_D2	1	patB	efflux	Fluoroquinolone	Streptococcus mitis B6 (taxid 365659)	Streptococcus	k141_24481	361	2127	875	2859.17
T1236B_6072006_D1_D2	1	patB	efflux	Fluoroquinolone	Streptococcus mitis B6 (taxid 365659)	Streptococcus	k141_25349	258	2024	376	1228.63
T1236B_6072006_D1_D2	1	tet(M)	target protection	Tetracycline	Streptococcus sp. JS71 (taxid 2382163)	Streptococcus	k141_18021	10187	12106	0	0
T1236B_6072006_D1_D2	1	tet(O)	target protection	Tetracycline	Streptococcus sp. HSISM1 (taxid 1316408)	Streptococcus	k141_23003	905	2824	568	1708.03
T1236B_6072006_D1_D2	1	tet(O)	target protection	Tetracycline	Streptococcus sp. JS71 (taxid 2382163)	Streptococcus	k141_18021	10187	12106	0	0
T1236B_6072006_D1_D2	1	tetA(46)	efflux	Tetracycline	Streptococcus australis (taxid 113107)	Streptococcus	k141_40932	71	1795	220	736.391
T1236B_6072006_D1_D2	1	tetA(46)	efflux	Tetracycline	Streptococcus sp. HSISM1 (taxid 1316408)	Streptococcus	k141_18166	324	2048	346	1158.14
T1236B_6072006_D1_D2	1	tetA(46)	efflux	Tetracycline	Streptococcus sp. HSISM1 (taxid 1316408)	Streptococcus	k141_31051	340	2064	381	1275.29
T1236B_6072006_D1_D2	1	tetB(46)	efflux	Tetracycline	Streptococcus australis (taxid 113107)	Streptococcus	k141_40932	1797	3526	237	791
T1236B_6072006_D1_D2	1	tetB(46)	efflux	Tetracycline	Streptococcus parasanguinis FW213 (taxid 1114965)	Streptococcus	k141_25797	112	1717	129	463.807
T1236B_6072006_D1_D2	1	tetB(46)	efflux	Tetracycline	Streptococcus sp. HSISM1 (taxid 1316408)	Streptococcus	k141_31051	2066	3795	260	867.763
T1236B_6072006_D1_D2	1	tetB(46)	efflux	Tetracycline	Streptococcus viridans (taxid 78535)	Streptococcus	k141_16523	1	1272	235	1066.95
T1246A_12062006_D1_D2	1	FosA5	inactivation	Fosfomycin	Klebsiella oxytoca (taxid 571)	Klebsiella	k141_14293	47808	48219	0	0
T1246A_12062006_D1_D2	1	RlmA(II)	target alteration	Macrolide/Lincosamide	Streptococcus oralis subsp. dentisani (taxid 1458253)	Streptococcus	k141_11847	295	1143	40	469.015
T1246A_12062006_D1_D2	1	arnA	efflux	Peptide	Pseudomonas fluorescens group (taxid 136843)	Pseudomonas	k141_21522	3	1450	29	199.274
T1246A_12062006_D1_D2	1	bacA	target alteration	Peptide	Klebsiella oxytoca (taxid 571)	Klebsiella	k141_4988	146952	147773	161	1949.87
T1246A_12062006_D1_D2	1	bla-C	inactivation	Beta-Lactam	Serratia liquefaciens ATCC 27592 (taxid 1346614)	Serratia	k141_12736	130180	131316	0	0
T1246A_12062006_D1_D2	1	blaI	inactivation	Beta-Lactam	Staphylococcus aureus subsp. aureus (taxid 46170)	Staphylococcus	k141_22167	10664	11509	77	906.059
T1246A_12062006_D1_D2	1	blaI	inactivation	Beta-Lactam	Staphylococcus aureus subsp. aureus (taxid 46170)	Staphylococcus	k141_22167	8430	8810	32	837.315
T1246A_12062006_D1_D2	1	blaOXY-6-1	inactivation	Beta-Lactam	Klebsiella oxytoca (taxid 571)	Klebsiella	k141_677	369616	370491	150	1704.53
T1246A_12062006_D1_D2	1	blaR1	inactivation	Beta-Lactam	Staphylococcus aureus subsp. aureus (taxid 46170)	Staphylococcus	k141_22167	8800	10557	108	611.187
T1246A_12062006_D1_D2	1	blaSPR-1	inactivation	Beta-Lactam	Serratia liquefaciens ATCC 27592 (taxid 1346614)	Serratia	k141_9860	191250	192140	5260	58764.9
T1246A_12062006_D1_D2	1	fosA	inactivation	Fosfomycin	Klebsiella oxytoca (taxid 571)	Klebsiella	k141_14293	47803	48219	0	0
T1246A_12062006_D1_D2	1	mef(A)	efflux	Macrolide	Streptococcus (taxid 1301)	Streptococcus	k141_20180	2223	3440	158	1290.89
T1246A_12062006_D1_D2	1	msr(D)	target protection	Macrolide	Streptococcus (taxid 1301)	Streptococcus	k141_20180	640	2103	183	1243.74
T1246A_12062006_D1_D2	1	oqxA10	efflux	Phenicol/Quinolone	Klebsiella oxytoca (taxid 571)	Klebsiella	k141_5570	1078381	1079556	148	1252.41
T1246A_12062006_D1_D2	1	oqxB	efflux	Phenicol/Quinolone	Klebsiella oxytoca (taxid 571)	Klebsiella	k141_5570	1075205	1078357	0	0
T1246A_12062006_D1_D2	1	oqxB	efflux	Phenicol/Quinolone	Serratia liquefaciens ATCC 27592 (taxid 1346614)	Serratia	k141_13130	159829	162932	0	0
T1246A_12062006_D1_D2	1	oqxB20	efflux	Phenicol/Quinolone	Klebsiella oxytoca (taxid 571)	Klebsiella	k141_5570	1075205	1078357	0	0
T1246A_12062006_D1_D2	1	oqxB9	efflux	Phenicol/Quinolone	Serratia liquefaciens ATCC 27592 (taxid 1346614)	Serratia	k141_13130	159829	162932	0	0
T1246A_12062006_D1_D2	1	patA	efflux	Fluoroquinolone	Streptococcus mitis B6 (taxid 365659)	Streptococcus	k141_17294	2385	4079	68	399.133
T1246A_12062006_D1_D2	1	patB	efflux	Fluoroquinolone	Streptococcus mitis B6 (taxid 365659)	Streptococcus	k141_17294	605	2371	68	382.86
T1246A_12062006_D1_D2	1	qnrE1	target protection	Fluoroquinolone	Serratia liquefaciens ATCC 27592 (taxid 1346614)	Serratia	k141_13130	292084	292715	4289	67584.8
T1246A_12062006_D1_D2	1	tet(38)	efflux	Tetracycline	Staphylococcus aureus (taxid 1280)	Staphylococcus	k141_6346	4461	5813	43	316.238
T1246A_12062006_D1_D2	1	tet(O)	target protection	Tetracycline	Streptococcus parasanguinis ATCC 15912 (taxid 760570)	Streptococcus	k141_21134	1302	3221	99	512.959
T1246A_12062006_D1_D2	1	tetA(46)	efflux	Tetracycline	Streptococcus sp. HSISM1 (taxid 1316408)	Streptococcus	k141_12683	9854	11578	110	634.421
T1246A_12062006_D1_D2	1	tetA(46)	efflux	Tetracycline	Streptococcus sp. HSISM1 (taxid 1316408)	Streptococcus	k141_6800	25944	27668	84	484.467
T1246A_12062006_D1_D2	1	tetB(46)	efflux	Tetracycline	Streptococcus sp. HSISM1 (taxid 1316408)	Streptococcus	k141_12683	8123	9852	134	770.605
T1246A_12062006_D1_D2	1	tetB(46)	efflux	Tetracycline	Streptococcus sp. HSISM1 (taxid 1316408)	Streptococcus	k141_6800	24213	25942	59	339.296
T1246B_12062006_D1_D2	1	AAC(6')-Ie-APH(2'')-Ia	inactivation	Aminoglycoside	Streptococcus mitis B6 (taxid 365659)	Streptococcus	k141_7066	10828	12077	23	168.194
T1246B_12062006_D1_D2	1	RlmA(II)	target alteration	Macrolide/Lincosamide	Streptococcus mitis B6 (taxid 365659)	Streptococcus	k141_1546	368	1216	326	3511.3
T1246B_12062006_D1_D2	1	RlmA(II)	target alteration	Macrolide/Lincosamide	Streptococcus mitis B6 (taxid 365659)	Streptococcus	k141_3642	235	1083	540	5816.26
T1246B_12062006_D1_D2	1	RlmA(II)	target alteration	Macrolide/Lincosamide	Streptococcus mitis B6 (taxid 365659)	Streptococcus	k141_4707	368	1216	1877	20216.9
T1246B_12062006_D1_D2	1	RlmA(II)	target alteration	Macrolide/Lincosamide	Streptococcus mitis B6 (taxid 365659)	Streptococcus	k141_4805	1592	2440	82	883.209
T1246B_12062006_D1_D2	1	aph(2'')-Ih	inactivation	Aminoglycoside	Streptococcus mitis B6 (taxid 365659)	Streptococcus	k141_7066	10841	11637	0	0
T1246B_12062006_D1_D2	1	arnA	efflux	Peptide	Pseudomonas trivialis (taxid 200450)	Pseudomonas	k141_4370	173349	175321	335	1551.61
T1246B_12062006_D1_D2	1	bla-C	inactivation	Beta-Lactam	Serratia liquefaciens ATCC 27592 (taxid 1346614)	Serratia	k141_2309	130232	131368	0	0
T1246B_12062006_D1_D2	1	blaI	inactivation	Beta-Lactam	Staphylococcus (taxid 1279)	Staphylococcus	k141_10398	1128	1508	2	48.072
T1246B_12062006_D1_D2	1	blaI	inactivation	Beta-Lactam	Staphylococcus aureus (taxid 1280)	Staphylococcus	k141_1095	960	1805	14	151.327
T1246B_12062006_D1_D2	1	blaSPR-1	inactivation	Beta-Lactam	Serratia liquefaciens ATCC 27592 (taxid 1346614)	Serratia	k141_2547	191449	192339	5449	55920.7
T1246B_12062006_D1_D2	1	catP	inactivation	Chloramphenicol	Streptococcus mitis B6 (taxid 365659)	Streptococcus	k141_10144	4029	4749	54	685.026
T1246B_12062006_D1_D2	1	erm(B)	target alteration	MLS	Streptococcus mitis B6 (taxid 365659)	Streptococcus	k141_10481	364	1095	0	0
T1246B_12062006_D1_D2	1	erm(B)	target alteration	MLS	Streptococcus mitis B6 (taxid 365659)	Streptococcus	k141_10481	372	1127	3	36.2928
T1246B_12062006_D1_D2	1	mef(A)	efflux	Macrolide	Streptococcus dysgalactiae (taxid 1334)	Streptococcus	k141_10558	3188	4405	2499	18755.2
T1246B_12062006_D1_D2	1	msr(D)	target protection	Macrolide	Streptococcus dysgalactiae (taxid 1334)	Streptococcus	k141_10558	1605	3068	2806	17518.2
T1246B_12062006_D1_D2	1	oqxB	efflux	Phenicol/Quinolone	Serratia liquefaciens ATCC 27592 (taxid 1346614)	Serratia	k141_1980	203951	207054	0	0
T1246B_12062006_D1_D2	1	oqxB9	efflux	Phenicol/Quinolone	Serratia liquefaciens ATCC 27592 (taxid 1346614)	Serratia	k141_1980	203951	207054	0	0
T1246B_12062006_D1_D2	1	patA	efflux	Fluoroquinolone	Streptococcus mitis B6 (taxid 365659)	Streptococcus	k141_2147	6371	8065	819	4415.87
T1246B_12062006_D1_D2	1	patA	efflux	Fluoroquinolone	Streptococcus mitis B6 (taxid 365659)	Streptococcus	k141_8929	817	2511	2731	14725
T1246B_12062006_D1_D2	1	patB	efflux	Fluoroquinolone	Streptococcus mitis B6 (taxid 365659)	Streptococcus	k141_13133	1041	2473	85	542.153
T1246B_12062006_D1_D2	1	patB	efflux	Fluoroquinolone	Streptococcus mitis B6 (taxid 365659)	Streptococcus	k141_2147	4591	6357	932	4820.26
T1246B_12062006_D1_D2	1	patB	efflux	Fluoroquinolone	Streptococcus mitis B6 (taxid 365659)	Streptococcus	k141_545	1151	2669	398	2394.73
T1246B_12062006_D1_D2	1	patB	efflux	Fluoroquinolone	Streptococcus mitis B6 (taxid 365659)	Streptococcus	k141_8929	2525	4291	2563	13255.7
T1246B_12062006_D1_D2	1	qnrE1	target protection	Fluoroquinolone	Serratia liquefaciens ATCC 27592 (taxid 1346614)	Serratia	k141_1980	336206	336837	4262	61692.1
T1246B_12062006_D1_D2	1	tet(M)	target protection	Tetracycline	Streptococcus cristatus (taxid 45634)	Streptococcus	k141_8572	9835	11754	0	0
T1246B_12062006_D1_D2	1	tet(O)	target protection	Tetracycline	Streptococcus cristatus (taxid 45634)	Streptococcus	k141_8572	9835	11754	0	0
T1246B_12062006_D1_D2	1	tet(O)	target protection	Tetracycline	Streptococcus parasanguinis ATCC 15912 (taxid 760570)	Streptococcus	k141_4476	932	2851	92	437.883
T1246B_12062006_D1_D2	1	tetA(46)	efflux	Tetracycline	Streptococcus sp. HSISM1 (taxid 1316408)	Streptococcus	k141_10625	8368	10092	892	4725.78
T1246B_12062006_D1_D2	1	tetA(46)	efflux	Tetracycline	Streptococcus sp. HSISM1 (taxid 1316408)	Streptococcus	k141_4159	1834	3558	57	301.984
T1246B_12062006_D1_D2	1	tetB(46)	efflux	Tetracycline	Streptococcus sp. HSISM1 (taxid 1316408)	Streptococcus	k141_10625	10094	11823	887	4685.7
T1246B_12062006_D1_D2	1	tetB(46)	efflux	Tetracycline	Streptococcus sp. HSISM1 (taxid 1316408)	Streptococcus	k141_4159	103	1832	75	396.198
T1296A_18092006_D1_D2	1	RlmA(II)	target alteration	Macrolide/Lincosamide	Streptococcus mitis (taxid 28037)	Streptococcus	k141_41313	350	1002	134	1663.26
T1296A_18092006_D1_D2	1	RlmA(II)	target alteration	Macrolide/Lincosamide	Streptococcus mitis (taxid 28037)	Streptococcus	k141_9795	1016	1864	2657	25357
T1296A_18092006_D1_D2	1	RlmA(II)	target alteration	Macrolide/Lincosamide	Streptococcus mitis B6 (taxid 365659)	Streptococcus	k141_1298	472	1311	323	3115.61
T1296A_18092006_D1_D2	1	RlmA(II)	target alteration	Macrolide/Lincosamide	Streptococcus mitis B6 (taxid 365659)	Streptococcus	k141_38434	338	1186	69	658.499
T1296A_18092006_D1_D2	1	RlmA(II)	target alteration	Macrolide/Lincosamide	Streptococcus pneumoniae (taxid 1313)	Streptococcus	k141_387	333	1181	149	1421.98
T1296A_18092006_D1_D2	1	RlmA(II)	target alteration	Macrolide/Lincosamide	Streptococcus pseudopneumoniae IS7493 (taxid 1054460)	Streptococcus	k141_19325	146	906	65	692.152
T1296A_18092006_D1_D2	1	RlmA(II)	target alteration	Macrolide/Lincosamide	Streptococcus pseudopneumoniae IS7493 (taxid 1054460)	Streptococcus	k141_27214	2186	3034	908	8665.47
T1296A_18092006_D1_D2	1	RlmA(II)	target alteration	Macrolide/Lincosamide	Streptococcus sp. oral taxon 431 (taxid 712633)	Streptococcus	k141_15360	1310	2158	168	1603.3
T1296A_18092006_D1_D2	1	arnA	efflux	Peptide	Pseudomonas fragi (taxid 296)	Pseudomonas	k141_9986	30433	32396	373	1537.77
T1296A_18092006_D1_D2	1	arnA	efflux	Peptide	Pseudomonas sp. MYb193 (taxid 1827300)	Pseudomonas	k141_46395	9	1634	48	239.051
T1296A_18092006_D1_D2	1	bacA	target alteration	Peptide	Enterobacter sp. SA187 (taxid 1914861)	Enterobacter	k141_22168	83054	83875	4433	43697.5
T1296A_18092006_D1_D2	1	catB	inactivation	Chloramphenicol	Proteobacteria (taxid 1224)	Proteobacteria	k141_19154	275	763	0	0
T1296A_18092006_D1_D2	1	catP	inactivation	Chloramphenicol	Proteobacteria (taxid 1224)	Proteobacteria	k141_19154	215	836	1	13.032
T1296A_18092006_D1_D2	1	catP	inactivation	Chloramphenicol	Proteobacteria (taxid 1224)	Proteobacteria	k141_19154	275	763	0	0
T1296A_18092006_D1_D2	1	cfxA3	inactivation	Beta-Lactam	Prevotella jejuni (taxid 1177574)	Prevotella	k141_39524	1114	1991	30	276.837
T1296A_18092006_D1_D2	1	mef(A)	efflux	Macrolide	Streptococcus dysgalactiae (taxid 1334)	Streptococcus	k141_34278	1107	2324	3060	20348.5
T1296A_18092006_D1_D2	1	mef(E)	efflux	Macrolide	Streptococcus sp. I-G2 (taxid 1156431)	Streptococcus	k141_36587	8975	10151	2845	19578.4
T1296A_18092006_D1_D2	1	msr(D)	target protection	Macrolide	Streptococcus dysgalactiae (taxid 1334)	Streptococcus	k141_34278	2444	3907	3726	20611.1
T1296A_18092006_D1_D2	1	patA	efflux	Fluoroquinolone	Streptococcus mitis B6 (taxid 365659)	Streptococcus	k141_12102	93	1558	1177	6501.91
T1296A_18092006_D1_D2	1	patA	efflux	Fluoroquinolone	Streptococcus mitis B6 (taxid 365659)	Streptococcus	k141_14025	2976	4670	297	1418.88
T1296A_18092006_D1_D2	1	patA	efflux	Fluoroquinolone	Streptococcus mitis B6 (taxid 365659)	Streptococcus	k141_43435	498	2192	1463	6989.29
T1296A_18092006_D1_D2	1	patA	efflux	Fluoroquinolone	Streptococcus mitis B6 (taxid 365659)	Streptococcus	k141_46065	1	1260	242	1555.58
T1296A_18092006_D1_D2	1	patA	efflux	Fluoroquinolone	Streptococcus mitis B6 (taxid 365659)	Streptococcus	k141_7183	265	1959	378	1805.84
T1296A_18092006_D1_D2	1	patA	efflux	Fluoroquinolone	Streptococcus sp. 116-D4 (taxid 2598453)	Streptococcus	k141_36603	1	1254	70	452.115
T1296A_18092006_D1_D2	1	patB	efflux	Fluoroquinolone	Streptococcus mitis B6 (taxid 365659)	Streptococcus	k141_14025	1196	2962	2131	9765.51
T1296A_18092006_D1_D2	1	patB	efflux	Fluoroquinolone	Streptococcus mitis B6 (taxid 365659)	Streptococcus	k141_17604	1183	2551	116	686.237
T1296A_18092006_D1_D2	1	patB	efflux	Fluoroquinolone	Streptococcus mitis B6 (taxid 365659)	Streptococcus	k141_18500	1	1478	317	1736.92
T1296A_18092006_D1_D2	1	patB	efflux	Fluoroquinolone	Streptococcus mitis B6 (taxid 365659)	Streptococcus	k141_43435	2206	3972	2130	9760.92
T1296A_18092006_D1_D2	1	tetA(46)	efflux	Tetracycline	Streptococcus sp. HSISM1 (taxid 1316408)	Streptococcus	k141_1123	2579	4303	74	347.373
T1296A_18092006_D1_D2	1	tetA(60)	efflux	Tetracycline	unclassified (taxid 0)	Unclassified	k141_30151	600	1855	18	116.073
T1296A_18092006_D1_D2	1	tetB(46)	efflux	Tetracycline	Streptococcus sp. HSISM1 (taxid 1316408)	Streptococcus	k141_1123	4305	5710	52	299.522
T1319B_27102006_D1_D2	1	RlmA(II)	target alteration	Macrolide/Lincosamide	Streptococcus mitis B6 (taxid 365659)	Streptococcus	k141_15385	565	1153	61	4919.6
T1319B_27102006_D1_D2	1	RlmA(II)	target alteration	Macrolide/Lincosamide	Streptococcus pneumoniae (taxid 1313)	Streptococcus	k141_18313	502	1350	88	4921.12
T1319B_27102006_D1_D2	1	RlmA(II)	target alteration	Macrolide/Lincosamide	Streptococcus pneumoniae (taxid 1313)	Streptococcus	k141_22293	2242	3090	509	28464.2
T1319B_27102006_D1_D2	1	RlmA(II)	target alteration	Macrolide/Lincosamide	Streptococcus sp. HSISM1 (taxid 1316408)	Streptococcus	k141_6172	686	1534	1765	98702.1
T1319B_27102006_D1_D2	1	RlmA(II)	target alteration	Macrolide/Lincosamide	Streptococcus sp. oral taxon 431 (taxid 712633)	Streptococcus	k141_36647	37676	38524	420	23487.2
T1319B_27102006_D1_D2	1	blaOXA-280	inactivation	Beta-lactam	Acinetobacter johnsonii XBB1 (taxid 1242245)	Acinetobacter	k141_40534	4682	5506	0	0
T1319B_27102006_D1_D2	1	blaOXA-644	inactivation	Beta-Lactam	Acinetobacter johnsonii XBB1 (taxid 1242245)	Acinetobacter	k141_40534	4682	5506	0	0
T1319B_27102006_D1_D2	1	blaTEM-1	inactivation	Beta-Lactam	Haemophilus influenzae biotype aegyptius (taxid 725)	Haemophilus	k141_39938	69255	69887	0	0
T1319B_27102006_D1_D2	1	blaTEM-141	inactivation	Beta-Lactam	Haemophilus influenzae biotype aegyptius (taxid 725)	Haemophilus	k141_39938	69255	69887	0	0
T1319B_27102006_D1_D2	1	catA16	inactivation	Chloramphenicol	Streptococcus salivarius (taxid 1304)	Streptococcus	k141_10756	59	718	11	791.561
T1319B_27102006_D1_D2	1	cfxA3	inactivation	Beta-Lactam	Prevotella jejuni (taxid 1177574)	Prevotella	k141_12589	8371	9336	105	5159.88
T1319B_27102006_D1_D2	1	macA	efflux	Macrolide	Neisseria cinerea (taxid 483)	Neisseria	k141_738	43372	44523	49	2018.82
T1319B_27102006_D1_D2	1	macB	efflux	Macrolide	Neisseria cinerea (taxid 483)	Neisseria	k141_738	44617	46503	71	1785.23
T1319B_27102006_D1_D2	1	mef(A)	efflux	Macrolide	Streptococcus dysgalactiae subsp. equisimilis (taxid 119602)	Streptococcus	k141_9027	3188	4405	2608	101624
T1319B_27102006_D1_D2	1	mef(E)	efflux	Macrolide	Streptococcus pneumoniae Hungary19A-6 (taxid 487214)	Streptococcus	k141_39963	13996	15172	1883	75931.2
T1319B_27102006_D1_D2	1	msr(D)	target protection	Macrolide	Streptococcus dysgalactiae subsp. equisimilis (taxid 119602)	Streptococcus	k141_9027	1605	3068	3214	104179
T1319B_27102006_D1_D2	1	patA	efflux	Fluoroquinolone	Streptococcus mitis B6 (taxid 365659)	Streptococcus	k141_24628	4236	5930	2606	72952.2
T1319B_27102006_D1_D2	1	patA	efflux	Fluoroquinolone	Streptococcus mitis B6 (taxid 365659)	Streptococcus	k141_39639	2114	3808	734	20547.5
T1319B_27102006_D1_D2	1	patB	efflux	Fluoroquinolone	Streptococcus mitis B6 (taxid 365659)	Streptococcus	k141_24628	5944	7710	2632	70676.1
T1319B_27102006_D1_D2	1	patB	efflux	Fluoroquinolone	Streptococcus mitis B6 (taxid 365659)	Streptococcus	k141_39639	3822	5588	636	17078.3
T1319B_27102006_D1_D2	1	penA	inactivation	Beta-Lactam	Neisseria cinerea (taxid 483)	Neisseria	k141_10148	71492	73240	84	2278.85
T1319B_27102006_D1_D2	1	tet(32)	target protection	Tetracycline	Streptococcus equi subsp. zooepidemicus (taxid 40041)	Streptococcus	k141_39145	35232	37151	173	4275.12
T1319B_27102006_D1_D2	1	tet(M)	target protection	Tetracycline	Streptococcus sp. ChDC B345 (taxid 1433513)	Streptococcus	k141_9904	464	1949	0	0
T1319B_27102006_D1_D2	1	tet(O)	target protection	Tetracycline	Streptococcus sp. ChDC B345 (taxid 1433513)	Streptococcus	k141_9904	464	1949	0	0
T1319B_27102006_D1_D2	1	tet(Q)	target protection	Tetracycline	Alistipes shahii WAL 8301 (taxid 717959)	Alistipes	k141_34400	886	2847	2	48.3648
T1319B_27102006_D1_D2	1	tet(Q)	target protection	Tetracycline	Alistipes shahii WAL 8301 (taxid 717959)	Alistipes	k141_34400	922	2895	3	72.106
T1319B_27102006_D1_D2	1	tetA(46)	efflux	Tetracycline	Streptococcus sp. HSISM1 (taxid 1316408)	Streptococcus	k141_38933	38169	39893	163	4483.61
T1319B_27102006_D1_D2	1	tetA(60)	efflux	Tetracycline	Bacillus (taxid 1386)	Bacillus	k141_19839	9605	11344	63	1717.98
T1319B_27102006_D1_D2	1	tetA(60)	efflux	Tetracycline	Terrabacteria group (taxid 1783272)	Terrabacteria	k141_28145	72	1811	50	1363.48
T1319B_27102006_D1_D2	1	tetB(46)	efflux	Tetracycline	Streptococcus sp. HSISM1 (taxid 1316408)	Streptococcus	k141_38933	36438	38167	165	4525.5
T1319B_27102006_D1_D2	1	tetB(60)	efflux	Tetracycline	Bacillus (taxid 1386)	Bacillus	k141_19839	7869	9608	62	1690.71
T1319B_27102006_D1_D2	1	tetB(60)	efflux	Tetracycline	Terrabacteria group (taxid 1783272)	Terrabacteria	k141_28145	1808	3547	38	1036.24
T1327A_13112006_D1_D2	1	FosA6	inactivation	Fosfomycin	Klebsiella pneumoniae subsp. pneumoniae 1084 (taxid 1193292)	Klebsiella	k141_8148	136105	136517	0	0
T1327A_13112006_D1_D2	1	RlmA(II)	target alteration	Macrolide/Lincosamide	Streptococcus mitis B6 (taxid 365659)	Streptococcus	k141_14031	454	1302	136	904.451
T1327A_13112006_D1_D2	1	RlmA(II)	target alteration	Macrolide/Lincosamide	Streptococcus mitis B6 (taxid 365659)	Streptococcus	k141_1444	1277	2125	793	5273.75
T1327A_13112006_D1_D2	1	RlmA(II)	target alteration	Macrolide/Lincosamide	Streptococcus mitis B6 (taxid 365659)	Streptococcus	k141_19239	1006	1854	62	412.323
T1327A_13112006_D1_D2	1	RlmA(II)	target alteration	Macrolide/Lincosamide	Streptococcus mitis B6 (taxid 365659)	Streptococcus	k141_729	312	1160	415	2759.91
T1327A_13112006_D1_D2	1	RlmA(II)	target alteration	Macrolide/Lincosamide	Streptococcus pneumoniae (taxid 1313)	Streptococcus	k141_37078	312	1160	383	2547.09
T1327A_13112006_D1_D2	1	RlmA(II)	target alteration	Macrolide/Lincosamide	Streptococcus sp. oral taxon 431 (taxid 712633)	Streptococcus	k141_11429	874	1722	52	345.82
T1327A_13112006_D1_D2	1	RlmA(II)	target alteration	Macrolide/Lincosamide	Streptococcus sp. oral taxon 431 (taxid 712633)	Streptococcus	k141_1394	449	1297	172	1143.86
T1327A_13112006_D1_D2	1	bacA	target alteration	Peptide	Klebsiella pneumoniae subsp. pneumoniae 1084 (taxid 1193292)	Klebsiella	k141_30706	161047	161868	5226	35897.8
T1327A_13112006_D1_D2	1	blaSHV-178	inactivation	Beta-Lactam	Klebsiella pneumoniae subsp. rhinoscleromatis SB3432 (taxid 861365)	Klebsiella	k141_10451	106573	107433	4648	30479.6
T1327A_13112006_D1_D2	1	fosA	inactivation	Fosfomycin	Klebsiella pneumoniae subsp. pneumoniae 1084 (taxid 1193292)	Klebsiella	k141_8148	136105	136517	0	0
T1327A_13112006_D1_D2	1	mef(A)	efflux	Macrolide	Streptococcus (taxid 1301)	Streptococcus	k141_25004	1107	2324	675	3127.92
T1327A_13112006_D1_D2	1	mef(A)	efflux	Macrolide	Streptococcus mitis B6 (taxid 365659)	Streptococcus	k141_6639	10721	11938	696	3225.23
T1327A_13112006_D1_D2	1	msr(D)	target protection	Macrolide	Clostridium kluyveri (taxid 1534)	Clostridium	k141_37150	1	1118	812	4099.63
T1327A_13112006_D1_D2	1	oqxA10	efflux	Phenicol/Quinolone	Klebsiella pneumoniae subsp. pneumoniae 1084 (taxid 1193292)	Klebsiella	k141_20016	43286	44461	5244	25169.1
T1327A_13112006_D1_D2	1	oqxB	efflux	Phenicol/Quinolone	Klebsiella pneumoniae subsp. pneumoniae 1084 (taxid 1193292)	Klebsiella	k141_20016	44485	47637	0	0
T1327A_13112006_D1_D2	1	oqxB19	efflux	Phenicol/Quinolone	Klebsiella pneumoniae subsp. pneumoniae 1084 (taxid 1193292)	Klebsiella	k141_20016	44485	47637	0	0
T1327A_13112006_D1_D2	1	patA	efflux	Fluoroquinolone	Streptococcus mitis B6 (taxid 365659)	Streptococcus	k141_18844	1847	3541	925	3079.43
T1327A_13112006_D1_D2	1	patB	efflux	Fluoroquinolone	Streptococcus mitis B6 (taxid 365659)	Streptococcus	k141_18844	67	1833	971	3100.78
T1327A_13112006_D1_D2	1	patB	efflux	Fluoroquinolone	Streptococcus mitis B6 (taxid 365659)	Streptococcus	k141_7985	1942	3708	1192	3806.52
T1327A_13112006_D1_D2	1	patB	efflux	Fluoroquinolone	Streptococcus mitis B6 (taxid 365659)	Streptococcus	k141_7996	1001	2767	165	526.909
T1327A_13112006_D1_D2	1	tetA(46)	efflux	Tetracycline	Streptococcus sp. HSISM1 (taxid 1316408)	Streptococcus	k141_26441	11671	13395	131	428.525
T1327A_13112006_D1_D2	1	tetB(46)	efflux	Tetracycline	Streptococcus sp. HSISM1 (taxid 1316408)	Streptococcus	k141_26441	9940	11669	124	404.454
T1327B_13112006_D1_D2	1	FosA6	inactivation	Fosfomycin	Klebsiella pneumoniae (taxid 573)	Klebsiella	k141_28785	386	798	0	0
T1327B_13112006_D1_D2	1	RlmA(II)	target alteration	Macrolide/Lincosamide	Streptococcus mitis (taxid 28037)	Streptococcus	k141_3743	273	1121	126	3191.38
T1327B_13112006_D1_D2	1	RlmA(II)	target alteration	Macrolide/Lincosamide	Streptococcus mitis B6 (taxid 365659)	Streptococcus	k141_242	2025	2873	301	7623.85
T1327B_13112006_D1_D2	1	RlmA(II)	target alteration	Macrolide/Lincosamide	Streptococcus mitis B6 (taxid 365659)	Streptococcus	k141_26903	995	1843	687	17400.6
T1327B_13112006_D1_D2	1	RlmA(II)	target alteration	Macrolide/Lincosamide	Streptococcus mitis B6 (taxid 365659)	Streptococcus	k141_28056	377	1225	756	19148.3
T1327B_13112006_D1_D2	1	RlmA(II)	target alteration	Macrolide/Lincosamide	Streptococcus mitis B6 (taxid 365659)	Streptococcus	k141_33089	3	727	29	860.326
T1327B_13112006_D1_D2	1	RlmA(II)	target alteration	Macrolide/Lincosamide	Streptococcus mitis B6 (taxid 365659)	Streptococcus	k141_9237	313	1161	672	17020.7
T1327B_13112006_D1_D2	1	RlmA(II)	target alteration	Macrolide/Lincosamide	Streptococcus mitis B6 (taxid 365659)	Streptococcus	k141_9239	313	1161	353	8940.92
T1327B_13112006_D1_D2	1	RlmA(II)	target alteration	Macrolide/Lincosamide	Streptococcus pneumoniae (taxid 1313)	Streptococcus	k141_6418	483	1331	981	24847.1
T1327B_13112006_D1_D2	1	aph(3')-IIc	inactivation	Aminoglycoside	Stenotrophomonas maltophilia JV3 (taxid 868597)	Stenotrophomonas	k141_19944	1930	2733	0	0
T1327B_13112006_D1_D2	1	aph(3')-IIc	inactivation	Aminoglycoside	Stenotrophomonas maltophilia JV3 (taxid 868597)	Stenotrophomonas	k141_19944	1954	2733	0	0
T1327B_13112006_D1_D2	1	blaSHV-178	inactivation	Beta-Lactam	Klebsiella (taxid 570)	Klebsiella	k141_95	126	986	19	474.524
T1327B_13112006_D1_D2	1	catP	inactivation	Chloramphenicol	Streptococcus pneumoniae Hungary19A-6 (taxid 487214)	Streptococcus	k141_5544	13369	14089	506	15094.6
T1327B_13112006_D1_D2	1	fosA	inactivation	Fosfomycin	Klebsiella pneumoniae (taxid 573)	Klebsiella	k141_28785	386	798	0	0
T1327B_13112006_D1_D2	1	mef(A)	efflux	Macrolide	Streptococcus sp. HSISM1 (taxid 1316408)	Streptococcus	k141_27756	2206	3423	7164	126435
T1327B_13112006_D1_D2	1	msr(D)	target protection	Macrolide	Streptococcus sp. HSISM1 (taxid 1316408)	Streptococcus	k141_27756	623	2086	8663	127183
T1327B_13112006_D1_D2	1	patA	efflux	Fluoroquinolone	Streptococcus mitis B6 (taxid 365659)	Streptococcus	k141_13792	1	1414	91	1383.26
T1327B_13112006_D1_D2	1	patA	efflux	Fluoroquinolone	Streptococcus mitis B6 (taxid 365659)	Streptococcus	k141_20843	1	1632	1079	14209.2
T1327B_13112006_D1_D2	1	patA	efflux	Fluoroquinolone	Streptococcus mitis B6 (taxid 365659)	Streptococcus	k141_23882	1	1577	357	4865.37
T1327B_13112006_D1_D2	1	patA	efflux	Fluoroquinolone	Streptococcus mitis B6 (taxid 365659)	Streptococcus	k141_622	568	2262	897	11373.2
T1327B_13112006_D1_D2	1	patB	efflux	Fluoroquinolone	Streptococcus mitis B6 (taxid 365659)	Streptococcus	k141_13792	1428	3194	225	2736.5
T1327B_13112006_D1_D2	1	patB	efflux	Fluoroquinolone	Streptococcus mitis B6 (taxid 365659)	Streptococcus	k141_26989	1	1472	1476	21551.5
T1327B_13112006_D1_D2	1	patB	efflux	Fluoroquinolone	Streptococcus mitis B6 (taxid 365659)	Streptococcus	k141_29275	1	1746	1414	17404.3
T1327B_13112006_D1_D2	1	patB	efflux	Fluoroquinolone	Streptococcus mitis B6 (taxid 365659)	Streptococcus	k141_29477	1	1746	1045	12862.5
T1327B_13112006_D1_D2	1	patB	efflux	Fluoroquinolone	Streptococcus mitis B6 (taxid 365659)	Streptococcus	k141_7435	265	2031	403	4901.37
T1327B_13112006_D1_D2	1	tet(M)	target protection	Tetracycline	Streptococcus sp. HSISM1 (taxid 1316408)	Streptococcus	k141_6972	12368	14287	0	0
T1327B_13112006_D1_D2	1	tet(O)	target protection	Tetracycline	Streptococcus sp. HSISM1 (taxid 1316408)	Streptococcus	k141_6972	12368	14287	0	0
T1327B_13112006_D1_D2	1	tetA(46)	efflux	Tetracycline	Streptococcus sp. LPB0220 (taxid 2610896)	Streptococcus	k141_27037	11671	13395	6747	84057.6
T1327B_13112006_D1_D2	1	tetB(46)	efflux	Tetracycline	Streptococcus sp. LPB0220 (taxid 2610896)	Streptococcus	k141_27037	9940	11669	6554	81417
T1327C_13112006_D1_D2	1	FosA6	inactivation	Fosfomycin	Klebsiella pneumoniae JM45 (taxid 1380908)	Klebsiella	k141_3478	13977	14389	0	0
T1327C_13112006_D1_D2	1	RlmA(II)	target alteration	Macrolide/Lincosamide	Streptococcus mitis B6 (taxid 365659)	Streptococcus	k141_10440	1336	2184	155	1007.81
T1327C_13112006_D1_D2	1	RlmA(II)	target alteration	Macrolide/Lincosamide	Streptococcus mitis B6 (taxid 365659)	Streptococcus	k141_2178	67	915	43	279.587
T1327C_13112006_D1_D2	1	RlmA(II)	target alteration	Macrolide/Lincosamide	Streptococcus mitis B6 (taxid 365659)	Streptococcus	k141_5605	113	961	171	1111.85
T1327C_13112006_D1_D2	1	RlmA(II)	target alteration	Macrolide/Lincosamide	Streptococcus pneumoniae (taxid 1313)	Streptococcus	k141_3120	113	961	68	442.137
T1327C_13112006_D1_D2	1	RlmA(II)	target alteration	Macrolide/Lincosamide	Streptococcus pseudopneumoniae IS7493 (taxid 1054460)	Streptococcus	k141_9235	560	1408	128	832.259
T1327C_13112006_D1_D2	1	RlmA(II)	target alteration	Macrolide/Lincosamide	Streptococcus sp. 116-D4 (taxid 2598453)	Streptococcus	k141_15937	624	1472	403	2620.31
T1327C_13112006_D1_D2	1	RlmA(II)	target alteration	Macrolide/Lincosamide	Streptococcus sp. oral taxon 431 (taxid 712633)	Streptococcus	k141_17876	18999	19847	360	2340.73
T1327C_13112006_D1_D2	1	ampC	inactivation	Beta-Lactam	Klebsiella pneumoniae subsp. rhinoscleromatis SB3432 (taxid 861365)	Klebsiella	k141_5275	124674	125807	0	0
T1327C_13112006_D1_D2	1	ampH	inactivation	Beta-Lactam	Escherichia coli APEC O1 (taxid 405955)	Escherichia	k141_4474	10636	11793	152	724.36
T1327C_13112006_D1_D2	1	bacA	target alteration	Peptide	Escherichia coli JJ1887 (taxid 1355101)	Escherichia	k141_5263	146113	146932	126	848.263
T1327C_13112006_D1_D2	1	bacA	target alteration	Peptide	Klebsiella pneumoniae subsp. pneumoniae 1084 (taxid 1193292)	Klebsiella	k141_13331	45744	46565	5142	34532.9
T1327C_13112006_D1_D2	1	blaEC-5	inactivation	Beta-Lactam	Klebsiella pneumoniae subsp. rhinoscleromatis SB3432 (taxid 861365)	Klebsiella	k141_5275	124674	125807	0	0
T1327C_13112006_D1_D2	1	blaSHV-178	inactivation	Beta-Lactam	Klebsiella pneumoniae subsp. rhinoscleromatis SB3432 (taxid 861365)	Klebsiella	k141_9919	106573	107433	4160	26671
T1327C_13112006_D1_D2	1	eptA	efflux	Peptide	Klebsiella pneumoniae subsp. rhinoscleromatis SB3432 (taxid 861365)	Klebsiella	k141_5275	166092	167735	198	664.464
T1327C_13112006_D1_D2	1	fosA	inactivation	Fosfomycin	Klebsiella pneumoniae JM45 (taxid 1380908)	Klebsiella	k141_3478	13977	14389	0	0
T1327C_13112006_D1_D2	1	kdpE	efflux	Aminoglycoside	Escherichia coli O104:H4 (taxid 1038927)	Escherichia	k141_13658	22374	23046	113	927.157
T1327C_13112006_D1_D2	1	mef(A)	efflux	Macrolide	Streptococcus (taxid 1301)	Streptococcus	k141_8395	977	2194	1420	6433.42
T1327C_13112006_D1_D2	1	mef(A)	efflux	Macrolide	Streptococcus dysgalactiae subsp. dysgalactiae (taxid 99822)	Streptococcus	k141_8391	5733	6950	319	1445.25
T1327C_13112006_D1_D2	1	msr(D)	target protection	Macrolide	Firmicutes (taxid 1239)	Firmicutes	k141_16673	1	1118	1101	5434.73
T1327C_13112006_D1_D2	1	oqxA10	efflux	Phenicol/Quinolone	Klebsiella pneumoniae subsp. pneumoniae 1084 (taxid 1193292)	Klebsiella	k141_16578	210592	211767	4881	22904.2
T1327C_13112006_D1_D2	1	oqxB	efflux	Phenicol/Quinolone	Klebsiella pneumoniae subsp. pneumoniae 1084 (taxid 1193292)	Klebsiella	k141_16578	207416	210568	0	0
T1327C_13112006_D1_D2	1	oqxB19	efflux	Phenicol/Quinolone	Klebsiella pneumoniae subsp. pneumoniae 1084 (taxid 1193292)	Klebsiella	k141_16578	207416	210568	0	0
T1327C_13112006_D1_D2	1	patA	efflux	Fluoroquinolone	Streptococcus sp. ChDC B345 (taxid 1433513)	Streptococcus	k141_16631	16471	18165	258	839.751
T1327C_13112006_D1_D2	1	patB	efflux	Fluoroquinolone	Streptococcus mitis B6 (taxid 365659)	Streptococcus	k141_6589	742	2508	606	1892.02
T1327C_13112006_D1_D2	1	patB	efflux	Fluoroquinolone	Streptococcus mitis B6 (taxid 365659)	Streptococcus	k141_7146	1180	2946	507	1582.93
T1327C_13112006_D1_D2	1	patB	efflux	Fluoroquinolone	Streptococcus sp. ChDC B345 (taxid 1433513)	Streptococcus	k141_16631	18179	19448	114	495.322
T1327C_13112006_D1_D2	1	tet(M)	target protection	Tetracycline	Enterococcus sp. HSIEG1 (taxid 1316414)	Enterococcus	k141_18017	1227	2804	0	0
T1327C_13112006_D1_D2	1	tet(O)	target protection	Tetracycline	Enterococcus sp. HSIEG1 (taxid 1316414)	Enterococcus	k141_18017	1227	2804	0	0
T1327C_13112006_D1_D2	1	tetA(46)	efflux	Tetracycline	Streptococcus sp. HSISM1 (taxid 1316408)	Streptococcus	k141_15403	11671	13395	909	2907.17
T1327C_13112006_D1_D2	1	tetB(46)	efflux	Tetracycline	Streptococcus sp. HSISM1 (taxid 1316408)	Streptococcus	k141_15403	9940	11669	902	2876.44
T1327C_13112006_D1_D2	1	ugd	efflux	Peptide	Escherichia coli (taxid 562)	Escherichia	k141_13676	2219	3385	172	813.344
T1329A_06112006_D1_D2	1	AAC(6')-Ie-APH(2'')-Ia	inactivation	Aminoglycoside	Streptococcus mitis B6 (taxid 365659)	Streptococcus	k141_6193	11034	12473	39	1094.81
T1329A_06112006_D1_D2	1	RlmA(II)	target alteration	Macrolide/Lincosamide	Streptococcus mitis B6 (taxid 365659)	Streptococcus	k141_2408	595	1443	106	5049.48
T1329A_06112006_D1_D2	1	RlmA(II)	target alteration	Macrolide/Lincosamide	Streptococcus mitis B6 (taxid 365659)	Streptococcus	k141_5731	27655	28503	1936	92224.4
T1329A_06112006_D1_D2	1	aph(2'')-Ih	inactivation	Aminoglycoside	Streptococcus mitis B6 (taxid 365659)	Streptococcus	k141_6193	11047	11843	0	0
T1329A_06112006_D1_D2	1	arnA	efflux	Peptide	Pseudomonas sp. MYb193 (taxid 1827300)	Pseudomonas	k141_8574	70556	72519	1115	22945.2
T1329A_06112006_D1_D2	1	catA7	inactivation	Chloramphenicol	Staphylococcus epidermidis (taxid 1282)	Staphylococcus	k141_9337	3027	3674	138	8616.11
T1329A_06112006_D1_D2	1	catP	inactivation	Chloramphenicol	Streptococcus mitis B6 (taxid 365659)	Streptococcus	k141_1599	2479	3199	64	3590.74
T1329A_06112006_D1_D2	1	erm(B)	target alteration	MLS	Streptococcus mitis B6 (taxid 365659)	Streptococcus	k141_344	4296	5058	4	212.052
T1329A_06112006_D1_D2	1	erm(B)	target alteration	MLS	Streptococcus mitis B6 (taxid 365659)	Streptococcus	k141_344	4321	5066	0	0
T1329A_06112006_D1_D2	1	mef(A)	efflux	Macrolide	Streptococcus mitis B6 (taxid 365659)	Streptococcus	k141_4169	118913	120130	1662	55166.7
T1329A_06112006_D1_D2	1	msr(D)	target protection	Macrolide	Streptococcus mitis B6 (taxid 365659)	Streptococcus	k141_4169	117330	118793	2213	61104.5
T1329A_06112006_D1_D2	1	patA	efflux	Fluoroquinolone	Streptococcus mitis B6 (taxid 365659)	Streptococcus	k141_5731	47036	48730	2930	69870
T1329A_06112006_D1_D2	1	patB	efflux	Fluoroquinolone	Streptococcus mitis B6 (taxid 365659)	Streptococcus	k141_5731	48744	50510	2995	68508.2
T1329A_06112006_D1_D2	1	tet(M)	target protection	Tetracycline	Streptococcus mitis B6 (taxid 365659)	Streptococcus	k141_8201	9871	11790	0	0
T1329A_06112006_D1_D2	1	tet(O)	target protection	Tetracycline	Streptococcus mitis B6 (taxid 365659)	Streptococcus	k141_8201	9871	11790	0	0
T1329A_06112006_D1_D2	1	tetA(46)	efflux	Tetracycline	Streptococcus sp. HSISM1 (taxid 1316408)	Streptococcus	k141_3287	25289	27013	91	2132.26
T1329A_06112006_D1_D2	1	tetB(46)	efflux	Tetracycline	Streptococcus sp. HSISM1 (taxid 1316408)	Streptococcus	k141_3287	23558	25287	135	3154.1
T1329B_06112006_D1_D2	1	RlmA(II)	target alteration	Macrolide/Lincosamide	Streptococcus mitis B6 (taxid 365659)	Streptococcus	k141_30334	945	1793	502	6463.34
T1329B_06112006_D1_D2	1	RlmA(II)	target alteration	Macrolide/Lincosamide	Streptococcus pneumoniae (taxid 1313)	Streptococcus	k141_17330	1089	1937	1682	21656
T1329B_06112006_D1_D2	1	RlmA(II)	target alteration	Macrolide/Lincosamide	Streptococcus sp. oral taxon 431 (taxid 712633)	Streptococcus	k141_1847	1	801	24	327.544
T1329B_06112006_D1_D2	1	arnA	efflux	Peptide	Pseudomonas sp. MYb193 (taxid 1827300)	Pseudomonas	k141_15941	6249	8212	5426	30179.2
T1329B_06112006_D1_D2	1	cfxA3	inactivation	Beta-Lactam	Prevotella melaninogenica (taxid 28132)	Prevotella	k141_6069	5941	6808	74	931.883
T1329B_06112006_D1_D2	1	macB	efflux	Macrolide	Neisseria subflava (taxid 28449)	Neisseria	k141_24799	8423	10360	12642	71258.2
T1329B_06112006_D1_D2	1	mef(A)	efflux	Macrolide	Streptococcus dysgalactiae (taxid 1334)	Streptococcus	k141_19589	1107	2324	1931	17323.7
T1329B_06112006_D1_D2	1	msr(D)	target protection	Macrolide	Streptococcus dysgalactiae (taxid 1334)	Streptococcus	k141_19589	2444	3907	2173	16216.8
T1329B_06112006_D1_D2	1	patA	efflux	Fluoroquinolone	Streptococcus mitis B6 (taxid 365659)	Streptococcus	k141_8305	1103	2797	2499	16106.5
T1329B_06112006_D1_D2	1	patA	efflux	Fluoroquinolone	Streptococcus mitis B6 (taxid 365659)	Streptococcus	k141_8323	1103	2797	730	4704.99
T1329B_06112006_D1_D2	1	penA	inactivation	Beta-Lactam	Neisseria subflava (taxid 28449)	Neisseria	k141_3236	41070	42818	12539	78319.6
T1329B_06112006_D1_D2	1	tet(M)	target protection	Tetracycline	Enterococcus sp. HSIEG1 (taxid 1316414)	Enterococcus	k141_31465	1	1608	0	0
T1329B_06112006_D1_D2	1	tet(M)	target protection	Tetracycline	Streptococcus (taxid 1301)	Streptococcus	k141_31462	1	1608	0	0
T1329B_06112006_D1_D2	1	tet(O)	target protection	Tetracycline	Enterococcus sp. HSIEG1 (taxid 1316414)	Enterococcus	k141_31465	1	1608	0	0
T1329B_06112006_D1_D2	1	tet(O)	target protection	Tetracycline	Streptococcus (taxid 1301)	Streptococcus	k141_31462	1	1608	0	0
T1329B_06112006_D1_D2	1	tetA(46)	efflux	Tetracycline	Streptococcus sp. HSISM1 (taxid 1316408)	Streptococcus	k141_8642	26088	27812	139	880.291
T1329B_06112006_D1_D2	1	tetB(46)	efflux	Tetracycline	Streptococcus sp. HSISM1 (taxid 1316408)	Streptococcus	k141_8642	24357	26086	138	871.431
T1337A_15112006_D1_D2	1	FosA5	inactivation	Fosfomycin	Klebsiella oxytoca (taxid 571)	Klebsiella	k141_90853	1	314	0	0
T1337A_15112006_D1_D2	1	RlmA(II)	target alteration	Macrolide/Lincosamide	Streptococcus mitis (taxid 28037)	Streptococcus	k141_109071	409	1257	135	2874.7
T1337A_15112006_D1_D2	1	RlmA(II)	target alteration	Macrolide/Lincosamide	Streptococcus mitis B6 (taxid 365659)	Streptococcus	k141_109079	1576	2172	103	3120.66
T1337A_15112006_D1_D2	1	RlmA(II)	target alteration	Macrolide/Lincosamide	Streptococcus mitis B6 (taxid 365659)	Streptococcus	k141_26577	2119	2901	272	6280.84
T1337A_15112006_D1_D2	1	RlmA(II)	target alteration	Macrolide/Lincosamide	Streptococcus mitis B6 (taxid 365659)	Streptococcus	k141_60013	122	962	313	6728.53
T1337A_15112006_D1_D2	1	RlmA(II)	target alteration	Macrolide/Lincosamide	Streptococcus mitis B6 (taxid 365659)	Streptococcus	k141_76720	122	970	1555	33112.3
T1337A_15112006_D1_D2	1	RlmA(II)	target alteration	Macrolide/Lincosamide	Streptococcus mitis B6 (taxid 365659)	Streptococcus	k141_96542	338	1186	71	1511.88
T1337A_15112006_D1_D2	1	RlmA(II)	target alteration	Macrolide/Lincosamide	Streptococcus pneumoniae (taxid 1313)	Streptococcus	k141_107795	277	1125	952	20272
T1337A_15112006_D1_D2	1	RlmA(II)	target alteration	Macrolide/Lincosamide	Streptococcus pneumoniae (taxid 1313)	Streptococcus	k141_29663	244	1092	344	7325.17
T1337A_15112006_D1_D2	1	RlmA(II)	target alteration	Macrolide/Lincosamide	Streptococcus sp. HSISM1 (taxid 1316408)	Streptococcus	k141_11657	277	1125	467	9944.35
T1337A_15112006_D1_D2	1	RlmA(II)	target alteration	Macrolide/Lincosamide	Streptococcus sp. oral taxon 431 (taxid 712633)	Streptococcus	k141_120830	3031	3879	139	2959.88
T1337A_15112006_D1_D2	1	RlmA(II)	target alteration	Macrolide/Lincosamide	Streptococcus sp. oral taxon 431 (taxid 712633)	Streptococcus	k141_24402	1569	2417	836	17801.9
T1337A_15112006_D1_D2	1	RlmA(II)	target alteration	Macrolide/Lincosamide	Streptococcus sp. oral taxon 431 (taxid 712633)	Streptococcus	k141_66406	4934	5782	86	1831.29
T1337A_15112006_D1_D2	1	RlmA(II)	target alteration	Macrolide/Lincosamide	Veillonella parvula HSIVP1 (taxid 1316254)	Veillonella	k141_134933	2313	3161	1606	34198.3
T1337A_15112006_D1_D2	1	blaCSP-1	inactivation	Beta-Lactam	Capnocytophaga sp. oral taxon 878 (taxid 1316596)	Capnocytophaga	k141_80090	13457	14329	0	0
T1337A_15112006_D1_D2	1	blaCSP-1	inactivation	Beta-Lactam	Capnocytophaga sp. oral taxon 878 (taxid 1316596)	Capnocytophaga	k141_80090	13469	14329	0	0
T1337A_15112006_D1_D2	1	fosA	inactivation	Fosfomycin	Klebsiella oxytoca (taxid 571)	Klebsiella	k141_90853	1	314	0	0
T1337A_15112006_D1_D2	1	macB	efflux	Macrolide	Neisseria subflava (taxid 28449)	Neisseria	k141_44126	241043	242980	226	2106.85
T1337A_15112006_D1_D2	1	mef(A)	efflux	Macrolide	Streptococcus pneumoniae (taxid 1313)	Streptococcus	k141_121647	3549	4766	1619	24022.1
T1337A_15112006_D1_D2	1	mef(E)	efflux	Macrolide	Streptococcus pneumoniae (taxid 1313)	Streptococcus	k141_124973	1177	2332	300	4690.23
T1337A_15112006_D1_D2	1	mef(E)	efflux	Macrolide	Streptococcus salivarius (taxid 1304)	Streptococcus	k141_53008	2039	3191	21	329.171
T1337A_15112006_D1_D2	1	msr(D)	target protection	Macrolide	Streptococcus pneumoniae (taxid 1313)	Streptococcus	k141_121647	1966	3429	1943	23981.9
T1337A_15112006_D1_D2	1	patA	efflux	Fluoroquinolone	Streptococcus mitis B6 (taxid 365659)	Streptococcus	k141_112569	2286	3980	1905	20306.6
T1337A_15112006_D1_D2	1	patA	efflux	Fluoroquinolone	Streptococcus mitis B6 (taxid 365659)	Streptococcus	k141_60131	109	1803	507	5404.43
T1337A_15112006_D1_D2	1	patA	efflux	Fluoroquinolone	Streptococcus mitis B6 (taxid 365659)	Streptococcus	k141_76210	104	1573	588	7227.88
T1337A_15112006_D1_D2	1	patA	efflux	Fluoroquinolone	Streptococcus mitis B6 (taxid 365659)	Streptococcus	k141_95803	109	1402	1704	23797.2
T1337A_15112006_D1_D2	1	patB	efflux	Fluoroquinolone	Streptococcus mitis B6 (taxid 365659)	Streptococcus	k141_110146	404	1969	339	3911.48
T1337A_15112006_D1_D2	1	patB	efflux	Fluoroquinolone	Streptococcus mitis B6 (taxid 365659)	Streptococcus	k141_112569	506	2272	396	4049.11
T1337A_15112006_D1_D2	1	patB	efflux	Fluoroquinolone	Streptococcus mitis B6 (taxid 365659)	Streptococcus	k141_116143	215	1981	3008	30756.9
T1337A_15112006_D1_D2	1	patB	efflux	Fluoroquinolone	Streptococcus mitis B6 (taxid 365659)	Streptococcus	k141_133160	2	1258	352	5060.67
T1337A_15112006_D1_D2	1	penA	inactivation	Beta-Lactam	Neisseria subflava (taxid 28449)	Neisseria	k141_26735	129793	131541	239	2468.95
T1337A_15112006_D1_D2	1	tet(32)	target protection	Tetracycline	Anaerococcus mediterraneensis (taxid 1870984)	Anaerococcus	k141_97174	8943	10862	172	1618.49
T1337A_15112006_D1_D2	1	tet(M)	target protection	Tetracycline	Leuconostoc mesenteroides subsp. mesenteroides (taxid 33967)	Leuconostoc	k141_22124	35653	37572	0	0
T1337A_15112006_D1_D2	1	tet(O)	target protection	Tetracycline	Leuconostoc mesenteroides subsp. mesenteroides (taxid 33967)	Leuconostoc	k141_22124	35653	37572	0	0
T1337A_15112006_D1_D2	1	tet(O)	target protection	Tetracycline	Streptococcus pneumoniae (taxid 1313)	Streptococcus	k141_75943	8450	10369	126	1185.63
T1337A_15112006_D1_D2	1	tet(Q)	target protection	Tetracycline	Porphyromonas gingivalis (taxid 837)	Porphyromonas	k141_95377	289	2214	0	0
T1337A_15112006_D1_D2	1	tet(Q)	target protection	Tetracycline	Porphyromonas gingivalis (taxid 837)	Porphyromonas	k141_95377	289	2262	56	512.526
T1337A_15112006_D1_D2	1	tetA(46)	efflux	Tetracycline	Streptococcus australis (taxid 113107)	Streptococcus	k141_44519	1	1607	166	1866.46
T1337A_15112006_D1_D2	1	tetA(46)	efflux	Tetracycline	Streptococcus sp. HSISM1 (taxid 1316408)	Streptococcus	k141_14071	3442	5166	186	1948.19
T1337A_15112006_D1_D2	1	tetA(60)	efflux	Tetracycline	Terrabacteria group (taxid 1783272)	Terrabacteria	k141_122225	183	1884	70	743.103
T1337A_15112006_D1_D2	1	tetA(60)	efflux	Tetracycline	Terrabacteria group (taxid 1783272)	Terrabacteria	k141_87305	201	1940	50	519.189
T1337A_15112006_D1_D2	1	tetB(46)	efflux	Tetracycline	Streptococcus australis (taxid 113107)	Streptococcus	k141_44519	1609	3338	234	2443.86
T1337A_15112006_D1_D2	1	tetB(46)	efflux	Tetracycline	Streptococcus sp. HSISM1 (taxid 1316408)	Streptococcus	k141_14071	1711	3440	154	1608.35
T1337A_15112006_D1_D2	1	tetB(60)	efflux	Tetracycline	Bacillus sp. FJAT-25496 (taxid 1742359)	Bacillus	k141_137613	475	2214	291	3021.68
T1337A_15112006_D1_D2	1	tetB(60)	efflux	Tetracycline	Homo sapiens (taxid 9606)	Homo	k141_83953	475	1714	61	889.025
T1337B_15112006_D1_D2	1	RlmA(II)	target alteration	Macrolide/Lincosamide	Streptococcus mitis (taxid 28037)	Streptococcus	k141_71504	277	1125	809	21701.4
T1337B_15112006_D1_D2	1	RlmA(II)	target alteration	Macrolide/Lincosamide	Streptococcus mitis (taxid 28037)	Streptococcus	k141_99129	429	1277	214	5740.54
T1337B_15112006_D1_D2	1	RlmA(II)	target alteration	Macrolide/Lincosamide	Streptococcus mitis B6 (taxid 365659)	Streptococcus	k141_109420	298	1146	227	6089.27
T1337B_15112006_D1_D2	1	RlmA(II)	target alteration	Macrolide/Lincosamide	Streptococcus mitis B6 (taxid 365659)	Streptococcus	k141_13542	122	970	82	2199.65
T1337B_15112006_D1_D2	1	RlmA(II)	target alteration	Macrolide/Lincosamide	Streptococcus mitis B6 (taxid 365659)	Streptococcus	k141_18114	1	760	52	1558.46
T1337B_15112006_D1_D2	1	RlmA(II)	target alteration	Macrolide/Lincosamide	Streptococcus mitis B6 (taxid 365659)	Streptococcus	k141_62926	925	1773	564	15129.3
T1337B_15112006_D1_D2	1	RlmA(II)	target alteration	Macrolide/Lincosamide	Streptococcus oralis subsp. tigurinus (taxid 1077464)	Streptococcus	k141_110723	1111	1865	63	1900.66
T1337B_15112006_D1_D2	1	RlmA(II)	target alteration	Macrolide/Lincosamide	Streptococcus pneumoniae (taxid 1313)	Streptococcus	k141_108867	277	1125	1237	33182.5
T1337B_15112006_D1_D2	1	RlmA(II)	target alteration	Macrolide/Lincosamide	Streptococcus sp. 116-D4 (taxid 2598453)	Streptococcus	k141_43224	6763	7383	772	28324.4
T1337B_15112006_D1_D2	1	RlmA(II)	target alteration	Macrolide/Lincosamide	Streptococcus sp. LPB0220 (taxid 2610896)	Streptococcus	k141_101531	326	1093	84	2491.26
T1337B_15112006_D1_D2	1	RlmA(II)	target alteration	Macrolide/Lincosamide	Streptococcus sp. oral taxon 431 (taxid 712633)	Streptococcus	k141_41406	2	683	35	1169.11
T1337B_15112006_D1_D2	1	RlmA(II)	target alteration	Macrolide/Lincosamide	Streptococcus sp. oral taxon 431 (taxid 712633)	Streptococcus	k141_91109	1321	2169	206	5525.95
T1337B_15112006_D1_D2	1	ampC	inactivation	Beta-Lactam	Escherichia coli O127:H6 (taxid 168807)	Escherichia	k141_59511	63322	64455	0	0
T1337B_15112006_D1_D2	1	ampH	inactivation	Beta-Lactam	Escherichia coli UM146 (taxid 869729)	Escherichia	k141_39906	131174	132331	107	2103.71
T1337B_15112006_D1_D2	1	bacA	target alteration	Peptide	Escherichia coli O127:H6 str. E2348/69 (taxid 574521)	Escherichia	k141_6634	316124	316943	107	2971.91
T1337B_15112006_D1_D2	1	blaEC-5	inactivation	Beta-Lactam	Escherichia coli O127:H6 (taxid 168807)	Escherichia	k141_59511	63322	64455	0	0
T1337B_15112006_D1_D2	1	eptA	efflux	Peptide	Escherichia coli O127:H6 (taxid 168807)	Escherichia	k141_59511	120359	122002	183	2533.66
T1337B_15112006_D1_D2	1	kdpE	efflux	Aminoglycoside	Escherichia coli O127:H6 (taxid 168807)	Escherichia	k141_21043	136884	137556	70	2369.54
T1337B_15112006_D1_D2	1	macB	efflux	Macrolide	Neisseria subflava (taxid 28449)	Neisseria	k141_4728	1078	3015	545	6400.33
T1337B_15112006_D1_D2	1	mef(A)	efflux	Macrolide	Streptococcus mitis B6 (taxid 365659)	Streptococcus	k141_108395	5398	6615	1456	27214.9
T1337B_15112006_D1_D2	1	mef(E)	efflux	Macrolide	Streptococcus salivarius (taxid 1304)	Streptococcus	k141_33359	1900	3052	33	651.623
T1337B_15112006_D1_D2	1	msr(D)	target protection	Macrolide	Streptococcus mitis B6 (taxid 365659)	Streptococcus	k141_108395	3815	5278	1754	27272.2
T1337B_15112006_D1_D2	1	patA	efflux	Fluoroquinolone	Streptococcus mitis B6 (taxid 365659)	Streptococcus	k141_20682	138	1496	881	14757.5
T1337B_15112006_D1_D2	1	patA	efflux	Fluoroquinolone	Streptococcus mitis B6 (taxid 365659)	Streptococcus	k141_91485	3497	4839	478	8102.34
T1337B_15112006_D1_D2	1	patA	efflux	Fluoroquinolone	Streptococcus mitis B6 (taxid 365659)	Streptococcus	k141_95515	423	2117	635	8526.99
T1337B_15112006_D1_D2	1	patB	efflux	Fluoroquinolone	Streptococcus mitis B6 (taxid 365659)	Streptococcus	k141_47582	22	1788	1900	24473.6
T1337B_15112006_D1_D2	1	patB	efflux	Fluoroquinolone	Streptococcus mitis B6 (taxid 365659)	Streptococcus	k141_91485	1717	3483	1033	13305.9
T1337B_15112006_D1_D2	1	penA	inactivation	Beta-Lactam	Neisseria subflava (taxid 28449)	Neisseria	k141_15339	1104	2609	374	5652.89
T1337B_15112006_D1_D2	1	penA	inactivation	Beta-Lactam	Neisseria subflava (taxid 28449)	Neisseria	k141_54494	23	1528	233	3521.72
T1337B_15112006_D1_D2	1	tet(32)	target protection	Tetracycline	Streptococcus anginosus (taxid 1328)	Streptococcus	k141_6185	1008	2927	121	1434.32
T1337B_15112006_D1_D2	1	tet(B)	efflux	Tetracycline	Pasteurellaceae (taxid 712)	Pasteurellaceae	k141_63670	194	1399	23	434.186
T1337B_15112006_D1_D2	1	tet(O)	target protection	Tetracycline	Streptococcus pneumoniae (taxid 1313)	Streptococcus	k141_24638	595	2514	53	628.255
T1337B_15112006_D1_D2	1	tet(Q)	target protection	Tetracycline	Prevotella intermedia ATCC 25611 = DSM 20706 (taxid 1122984)	Prevotella	k141_76288	3959	5884	0	0
T1337B_15112006_D1_D2	1	tet(Q)	target protection	Tetracycline	Prevotella intermedia ATCC 25611 = DSM 20706 (taxid 1122984)	Prevotella	k141_76288	3959	5932	18	207.53
T1337B_15112006_D1_D2	1	tetA(46)	efflux	Tetracycline	Streptococcus sp. HSISM1 (taxid 1316408)	Streptococcus	k141_14420	2017	3741	228	3008.38
T1337B_15112006_D1_D2	1	tetB(46)	efflux	Tetracycline	Streptococcus australis (taxid 113107)	Streptococcus	k141_53752	1	1476	94	1449.68
T1337B_15112006_D1_D2	1	tetB(46)	efflux	Tetracycline	Streptococcus sp. HSISM1 (taxid 1316408)	Streptococcus	k141_14420	286	2015	222	2920.74
T1337B_15112006_D1_D2	1	tetB(60)	efflux	Tetracycline	Terrabacteria group (taxid 1783272)	Terrabacteria	k141_69912	761	2500	95	1242.68
T1337B_15112006_D1_D2	1	ugd	efflux	Peptide	Escherichia coli O127:H6 (taxid 168807)	Escherichia	k141_3028	356567	357733	95	1853.36
T1338A_05012007_D1_D2	1	RlmA(II)	target alteration	Macrolide/Lincosamide	Streptococcus australis (taxid 113107)	Streptococcus	k141_116470	1	630	23	848.67
T1338A_05012007_D1_D2	1	RlmA(II)	target alteration	Macrolide/Lincosamide	Streptococcus mitis (taxid 28037)	Streptococcus	k141_60932	291	1139	180	4926.5
T1338A_05012007_D1_D2	1	RlmA(II)	target alteration	Macrolide/Lincosamide	Streptococcus mitis B6 (taxid 365659)	Streptococcus	k141_108253	291	1139	119	3256.96
T1338A_05012007_D1_D2	1	RlmA(II)	target alteration	Macrolide/Lincosamide	Streptococcus mitis B6 (taxid 365659)	Streptococcus	k141_146647	1	780	52	1549.27
T1338A_05012007_D1_D2	1	RlmA(II)	target alteration	Macrolide/Lincosamide	Streptococcus mitis B6 (taxid 365659)	Streptococcus	k141_168325	78	795	28	906.359
T1338A_05012007_D1_D2	1	RlmA(II)	target alteration	Macrolide/Lincosamide	Streptococcus oralis subsp. dentisani (taxid 1458253)	Streptococcus	k141_99232	189	941	21	648.131
T1338A_05012007_D1_D2	1	RlmA(II)	target alteration	Macrolide/Lincosamide	Streptococcus oralis subsp. tigurinus (taxid 1077464)	Streptococcus	k141_101834	5	744	43	1350.47
T1338A_05012007_D1_D2	1	RlmA(II)	target alteration	Macrolide/Lincosamide	Streptococcus pneumoniae (taxid 1313)	Streptococcus	k141_108255	1	678	31	1062.76
T1338A_05012007_D1_D2	1	RlmA(II)	target alteration	Macrolide/Lincosamide	Streptococcus pneumoniae (taxid 1313)	Streptococcus	k141_116002	281	875	34	1328.48
T1338A_05012007_D1_D2	1	RlmA(II)	target alteration	Macrolide/Lincosamide	Streptococcus pneumoniae (taxid 1313)	Streptococcus	k141_138114	967	1815	471	12891
T1338A_05012007_D1_D2	1	RlmA(II)	target alteration	Macrolide/Lincosamide	Streptococcus pneumoniae (taxid 1313)	Streptococcus	k141_163263	179	1027	862	23592.4
T1338A_05012007_D1_D2	1	RlmA(II)	target alteration	Macrolide/Lincosamide	Streptococcus pneumoniae (taxid 1313)	Streptococcus	k141_58656	441	1289	462	12644.7
T1338A_05012007_D1_D2	1	RlmA(II)	target alteration	Macrolide/Lincosamide	Streptococcus pneumoniae Hungary19A-6 (taxid 487214)	Streptococcus	k141_56160	802	1650	98	2682.2
T1338A_05012007_D1_D2	1	RlmA(II)	target alteration	Macrolide/Lincosamide	Streptococcus sp. oral taxon 431 (taxid 712633)	Streptococcus	k141_61314	191	1039	215	5884.43
T1338A_05012007_D1_D2	1	RlmA(II)	target alteration	Macrolide/Lincosamide	Streptococcus sp. oral taxon 431 (taxid 712633)	Streptococcus	k141_69868	145	987	47	1295.53
T1338A_05012007_D1_D2	1	RlmA(II)	target alteration	Macrolide/Lincosamide	Streptococcus sp. oral taxon 431 (taxid 712633)	Streptococcus	k141_80331	966	1760	92	2689.24
T1338A_05012007_D1_D2	1	blaROB-1	inactivation	Beta-Lactam	Actinobacillus pleuropneumoniae serovar 7 str. AP76 (taxid 537457)	Actinobacillus	k141_175834	3739	4656	51	1290.81
T1338A_05012007_D1_D2	1	blaTEM-1	inactivation	Beta-Lactam	Haemophilus influenzae 10810 (taxid 862964)	Haemophilus	k141_51540	37378	38238	319	8609.02
T1338A_05012007_D1_D2	1	catA16	inactivation	Chloramphenicol	Streptococcus salivarius (taxid 1304)	Streptococcus	k141_36543	2932	3591	52	1831.38
T1338A_05012007_D1_D2	1	cfxA3	inactivation	Beta-Lactam	Prevotella intermedia ATCC 25611 = DSM 20706 (taxid 1122984)	Prevotella	k141_26139	7729	8694	941	22632
T1338A_05012007_D1_D2	1	lsa(C)	target protection	Lincosamide/Streptogramin	Streptococcus equi subsp. zooepidemicus (taxid 40041)	Streptococcus	k141_47949	128	1606	41	643.829
T1338A_05012007_D1_D2	1	macA	efflux	Macrolide	Neisseria meningitidis M0579 (taxid 935590)	Neisseria	k141_119749	4866	6041	86	1698.72
T1338A_05012007_D1_D2	1	macB	efflux	Macrolide	Neisseria meningitidis M0579 (taxid 935590)	Neisseria	k141_119749	2864	4798	146	1752.1
T1338A_05012007_D1_D2	1	mef(A)	efflux	Macrolide	Streptococcus sp. FDAARGOS_192 (taxid 1839799)	Streptococcus	k141_76747	2554	3771	2641	50366.2
T1338A_05012007_D1_D2	1	mef(E)	efflux	Macrolide	Streptococcus pneumoniae SPNA45 (taxid 869309)	Streptococcus	k141_150363	1173	2349	50	986.789
T1338A_05012007_D1_D2	1	msr(D)	target protection	Macrolide	Streptococcus sp. FDAARGOS_192 (taxid 1839799)	Streptococcus	k141_76747	3891	5354	3243	51447.5
T1338A_05012007_D1_D2	1	patA	efflux	Fluoroquinolone	Streptococcus mitis B6 (taxid 365659)	Streptococcus	k141_126496	1	1218	1055	20119.8
T1338A_05012007_D1_D2	1	patA	efflux	Fluoroquinolone	Streptococcus mitis B6 (taxid 365659)	Streptococcus	k141_162861	1	1262	516	9497.21
T1338A_05012007_D1_D2	1	patA	efflux	Fluoroquinolone	Streptococcus sp. oral taxon 431 (taxid 712633)	Streptococcus	k141_120549	775	2100	50	875.821
T1338A_05012007_D1_D2	1	patB	efflux	Fluoroquinolone	Streptococcus mitis B6 (taxid 365659)	Streptococcus	k141_146424	193	1959	606	7964.22
T1338A_05012007_D1_D2	1	patB	efflux	Fluoroquinolone	Streptococcus sp. oral taxon 431 (taxid 712633)	Streptococcus	k141_5629	1	1245	119	2220.18
T1338A_05012007_D1_D2	1	penA	inactivation	Beta-Lactam	Neisseria subflava (taxid 28449)	Neisseria	k141_82281	1852	3600	1689	22425.9
T1338A_05012007_D1_D2	1	tet(32)	target protection	Tetracycline	Streptococcus anginosus (taxid 1328)	Streptococcus	k141_56900	1001	2920	45	544.251
T1338A_05012007_D1_D2	1	tet(M)	target protection	Tetracycline	Enterococcus faecalis (taxid 1351)	Enterococcus	k141_40449	3990	5715	0	0
T1338A_05012007_D1_D2	1	tet(M)	target protection	Tetracycline	Enterococcus sp. HSIEG1 (taxid 1316414)	Enterococcus	k141_58431	1	1434	0	0
T1338A_05012007_D1_D2	1	tet(O)	target protection	Tetracycline	Enterococcus faecalis (taxid 1351)	Enterococcus	k141_40449	3990	5715	0	0
T1338A_05012007_D1_D2	1	tet(O)	target protection	Tetracycline	Enterococcus sp. HSIEG1 (taxid 1316414)	Enterococcus	k141_58431	1	1432	0	0
T1338A_05012007_D1_D2	1	tet(O)	target protection	Tetracycline	Enterococcus sp. HSIEG1 (taxid 1316414)	Enterococcus	k141_58431	1	1434	0	0
T1338A_05012007_D1_D2	1	tet(Q)	target protection	Tetracycline	Bacteroides uniformis (taxid 820)	Bacteroides	k141_170975	392	2353	6	71.0125
T1338A_05012007_D1_D2	1	tet(Q)	target protection	Tetracycline	Bacteroides uniformis (taxid 820)	Bacteroides	k141_170975	428	2401	33	388.194
T1338A_05012007_D1_D2	1	tet(W)	target protection	Tetracycline	Lachnospiraceae bacterium GAM79 (taxid 2109691)	Lachnospiraceae	k141_77996	1107	3026	68	822.423
T1338A_05012007_D1_D2	1	tetA(60)	efflux	Tetracycline	Streptococcus gordonii (taxid 1302)	Streptococcus	k141_133074	29817	31556	423	5645.5
T1338A_05012007_D1_D2	1	tetB(46)	efflux	Tetracycline	Streptococcus australis (taxid 113107)	Streptococcus	k141_128022	603	2332	255	3423
T1338A_05012007_D1_D2	1	tetB(60)	efflux	Tetracycline	Streptococcus gordonii (taxid 1302)	Streptococcus	k141_133074	28081	29820	350	4671.22
T1338B_05012007_D1_D2	1	FosA2	inactivation	Fosfomycin	Lelliottia sp. WB101 (taxid 2153385)	Lelliottia	k141_13447	5212	5613	44	1694.43
T1338B_05012007_D1_D2	1	RlmA(II)	target alteration	Macrolide/Lincosamide	Streptococcus mitis (taxid 28037)	Streptococcus	k141_25336	222	1070	135	2458.4
[truncated: 23,544 more rows]

## Sheet: S7 IS_all TP
Table S7: List of Insertion seqeunces identified at all time points.
[truncated: 409,870+ more rows]

## Sheet: S8 Tn916_ARG
Table S8: Contigs carrying ARG/s and Tn916 within 7kb.
[truncated: 210 more rows]

[truncated: 7 more sheets: S9 Heritability, S10 Metadata_all TP, S11 Environmental, S12 DAA caries, S13 TPM_T1, S14 TPM_T2, S15 TPM_T3]
